# Supplementary material
Source: publisher figshare collection journal article supplement (https://tandf.figshare.com/ndownloader/files/40903997)
Supplement: Supplementary file 1 [file 40903997]

## Sheet: File 1 Geochemical data
		Hines et al. (2023). Supplemental dat
		Australian Journal of Earth Sciences, 70(6), https://doi.org/10.1080/08120099.2023.2209649
		Supplemental data File 1. Geochemical Data.
Project_Code	SampleID	UNIT	Tenement	East_MGA	North_MGA	RL	Prospect	Sample_Depth_Width	Lithology	Lith_Code_Insitu	Lith_Code_Subcrop	Lith_Code_Float	Lith_Description	Type_Sampling	Lith1_Code	BATCH	Ag_ppm	Al_%	As_ppm	Ba_ppm	Be_ME-MS61_ppm	Bi_ME-MS61_ppm	Ca_ME-MS61_%	Cd_ME-MS61_ppm	Ce_ME-MS61_ppm	Co_ME-MS61_ppm	Cr_ME-MS61_ppm	Cs_ME-MS61_ppm	Cu_ME-MS61_ppm	Fe_ME-MS61_%	Ga_ME-MS61_ppm	Ge_ME-MS61_ppm	Hf_ME-MS61_ppm	In_ME-MS61_ppm	K_ME-MS61_%	La_ME-MS61_ppm	Li_ME-MS61_ppm	Mg_ME-MS61_%	Mn_ME-MS61_ppm	Mo_ME-MS61_ppm	Na_ME-MS61_%	Nb_ME-MS61_ppm	Ni_ME-MS61_ppm	P_ME-MS61_ppm	Pb_ME-MS61_ppm	Rb_ME-MS61_ppm	Re_ME-MS61_ppm	S_ME-MS61_%	Sb_ME-MS61_ppm
MIRE	68923	Dorchap Peg	EL5315	523924	5949230	1116	EAGLE DYKE	10	PEG	PEG			Coarse F/Spar/Qtz/SPOG? As PEG (No Tourmaline) - pockets / zones of strong Mn staininig - poss associat with with strong areas of spodumene?	CHIP	PEG	OR17005807	0.01	7.87	15.7	40	29.9	0.92	0.01	0.08	2.61	9.1	4	48.2	4.8	0.52	17	0.15	0.9	0.012	3.21	1.4	4350	0.02	1160	0.3	0.76	34.2	7.7	610	19.4	780			0.19
MCRE	68924	Dorchap Peg	EL006486	520159	5950872	632	MIRE	5	PEG	PEG			Tourmaline bearing coarse PEG	GRAB	PEG	OR17005807	0.05	6.55	7.7	10	1.75	0.27	0.07	0.05	2.7	2.4	5	11.6	3.6	0.38	12.6	0.17	1		3.42	3.1	14.8	0.02	280	0.4	2.89	3.9	2.2	920	19.8	323			0.2
MCRE	68925	Dorchap Peg	EL006486	520069	5951155	692	MIRE	5	PEG	PEG			m width very coarse PEG - F/spar, Qtz and Mica.	GRAB	PEG	OR17005807	0.01	5.88	12.5	20	4.62	0.33	0.04	0.14	1.68	7.9	2	4.38	1.9	0.43	16.2	0.17	0.3	0.007	1.13	2.6	27.3	0.01	980	0.19	5.05	8.6	2.8	1520	14.4	127			0.05
MCRE	68926	Dorchap Peg	EL006486	525970	5944603	1140	REGIONAL	20	PEG	PEG			70% Qtz, minor K-spar, Mica and NO TOURMALINE	CHIP	PEG	OR17028462	0.13	10.25	14.9	140	38.9	0.2	0.08		1.27	1	2	138	2.6	0.56	28.5	0.15	0.4		6.42	0.6	97.1	0.06	111	0.08	1.36	44.5	2.5	1260	19.8	1780			0.98
MCRE	68927	Dorchap Peg	EL006486	524504	5942813	1165	REGIONAL	14	PEG	PEG			Course PEG - Predom shattered Qtx/Mica groundmass with >0.5m shattered K/spar Megacrysts. Mica makes up 20-30% of PEG and 50% Qtz - 20% Fspar. NO TOURMALINE	CHIP	PEG	OR17028462	0.18	8.73	49.4	100	7.11	1.15	0.18	0.17	3.45	4	2	30.1	13.5	1.04	33.9	0.13	1.3	0.024	3.11	2.1	270	0.06	629	0.2	1.44	69.9	2.1	2990	42.3	730			0.16
MCRE	68928	Dorchap Peg	EL006486	524340	5942688	1187	REGIONAL	17	PEG	PEG			Very coarse PEG, variable composition across strike, abundant book mica > 30mm, zones of coarse K-Spar in pockets. Zones of granitic texture. No tourmaline visible.	CHIP	PEG	OR17028462	0.17	7.82	19.4	20	4.08	0.74	0.09	0.75	0.99	1	2	19.65	3.6	0.93	25	0.12	0.6	0.025	3.6	0.6	196	0.02	1650	0.14	2.28	40	1	2820	14.6	700			0.1
MCRE	68929	Dorchap Peg	EL006486	526812	5944854	938	REGIONAL	4	PEG	PEG			Med grained PEG, Mica rich. F/Spar - Qtz and minor Mn staines. Minor large F/Spar megacrysts <40mm. NO TOURMALINE.	CHIP	PEG	OR17028462	0.18	8.69	23	150	49.6	0.52	0.09	0.05	6.3	2.4	6	69.8	3.5	0.81	27.9	0.1	6		2.55	3.6	77.2	0.06	1190	0.1	3.58	74.4	2.7	1810	25.2	810			0.1
MIRE	68930	Dorchap Peg	EL5315	523944	5949218	1109	EAGLE DYKE		PEG	PEG			UPHILL FROM SITE 608488, ON SAME PEGMATITE OUTCROP. OUTCROP STRIKES ABOUT 286° GRID AZI. GRAB SAMPLE TAKEN FROM RANDOM CHIPS ACROSS OUTCROP TO FILL AROUND10Kg BAG. OUTCROP APPROX 4m WIDE AT THIS POINT. FELDSPAR WEATHERED TO KAOLIN, Mn STAINS ON FRACTURE	GRAB	PEG	OR17028462	0.23	7.76	16.5	40	74.6	0.57	0.04	0.29	3.99	1.2	3	49.5	1.7	0.68	21.7	0.1	1.1	0.055	2.18	1.9	1260	0.03	661	0.13	2.62	65.1	3.6	870	13.5	620			0.11
MIRE	68932	Dorchap Peg	EL5315	526501	5948360	922	HODGKIN DYKES		PEG	PEG			PEGMATITE AND META-PSAMMITES IN FACE WITHIN OLD OPEN CUT. SCHISTS ON WALLROCK CONTAIN PEGMATITE STRINGERS AND ASSOCIATED SILICA FLOODING. PEG/DYKE ZONE ABOUT 2m IN WIDTH. OPEN CUT STRIKES 282° GRID AZI AND IS AROUND 3.2m WIDE.	CHIP	PEG	OR17028462	0.12	8.13	14.2	60	45.8	0.59	0.21		3.44	0.8	4	48.2	11.6	0.58	23.5	0.1	0.8		2.68	1.6	66.2	0.02	193	0.42	2.72	63.9	2.1	1860	10.2	710			0.09
MIRE	68933	Dorchap Peg	EL5315	524593	5950425	991	FERGUSSONS		PEG	PEG			OUTCROP ON ROADSIDE (SEE PHOTO). APPROX. 2.5m WIDE AND STRIKING 219.6° GRID AZI. MUSCOVITE RICH, Mn? OXIDISED STAINS, SLIGHT SUGARY GREEN MINERALS, TEXTURE/GREISEN.	GRAB	PEG	OR17028462	0.16	6.95	4.1	20	43.7	0.45	0.09		0.93	0.5	2	34.7	1.1	0.49	19.9	0.1	1		2.31		930		612	0.1	3.48	72	0.8	1460	11.7	690			0.09
MIRE	68937	Dorchap Peg	EL5315	527430	5953361	635	BHP28		PEG			PEG	SPOIL HEAP FROM EXCAVATED PEGMATITE DYKE WITHIN OLD ADIT. NOTES ON ADIT IN FIELD REPORT. GREISENISED PEGMATITE, OXIDISED HALOES WITHIN GREISEN, POSSIBLY OXIDISED SN02	GRAB	PEG	OR17028462		7.84	11.5	20	4.62	0.04	0.02		0.61	1.3	1	55.5	1.5	0.47	19.85	0.05	2.8		1.38	1	93.9	0.02	136	0.11	3.55	82.6	5	400	16.6	438			0.16
MIRE	68936	Dorchap Peg	EL5315	527434	5953366	640	BHP28		PEG	PEG			PEGMATITE OUTCROP APPROX. 1.8m WIDE. THIS OUTCROP IS PROBABLY DYKE SEEN IN LEFT WALL OF ADIT BELOW. MICA, FELDSPAR (KAOLIN), OXIDISED CASSITERITE? (BLEBS), NO OUTCROP VISIBLE IN ROAD ABOVE SITE, ALONG STRIKE.	CHIP	PEG	OR17028462	0.15	8.3	8.1	30	16.1	0.35	0.02		1.22	1	2	102	0.9	0.44	26.4	0.12	3.5		2.51	2.6	57.5	0.01	345	0.09	4.11	108	2.6	600	33.5	840			0.09
MIRE	68938	Dorchap Peg	EL5315	526237	5954441	829	BLAIRS DYKES		PEG_SN			PEG_SN	BOULDERS OF GREISENISED PEGMATITE, POSSIBLY THROWN OUT FROM OLD SHAFT SUNK UP HILL FROM THIS SITE. MUSCOVITE RICH MATRIX, COARSE CASSITERITE BLEBS AND WITHIN LAYERS THAT HAVE GREISEN. ONE SPECIMEN HAD TWINNED RUTILE NEEDLES ON META-SCHIST BEDDING PLANE.	GRAB	PEG	OR17028462	0.56	7.3	13.3	30	85.5	3.79		4.02	0.4	2.8	2	98	1.8	0.51	40.1	0.07	1.5		3.3		55.9	0.02	213	0.31	0.54	246	1.6	150	6.8	1310			0.12
MIRE	68941	Dorchap Peg	EL5315	524813	5959400	946	SPRINGTIME LEASES		PEG			PEG	2m DEEP PIT EXPOSING PEGMATITE DYKE WHICH IS AROUND 2.5m IN THICKNESS. PEG ON STRIKE WITH OUTCROP FROM SITE 608499. MUSCOVITE, STRONG GREISEN, NO VISIBLE SNO2	GRAB	PEG	OR17028462	0.19	8.18	13.2	20	91.8	0.68	0.09	0.1	1.39	0.8	3	55.6	1.1	0.36	33.1	0.07	1.4	0.037	2.36	0.7	124	0.02	114	0.08	3.12	153	1.4	1120	25.1	890			0.12
MIRE	68942	Dorchap Peg	EL5315	523746	5953848	577	GOSPORT		PEG_SN			PEG_SN	FLOAT FROM MULLOCK DUMP OF SHAFT. COARSE MUSCOVITE, SERICITE ALT, GREISEN, SILICA ALT. META-SEDS, COARSE (`10mm) CASSITERITE BLEBS.	GRAB	PEG	OR17028462	0.12	7.84	39.1	30	142	0.18	0.05		0.36	0.8	1	112.5	2.9	0.38	35.8	0.1	1.5		2.16		114.5	0.01	196	0.08	2.87	88.4	1	910	13.9	1000			0.07
MIRE	68943	Dorchap Peg	EL5315	523716	5953071	700	GOSPORT		PEG	PEG			LARGE SILICA RICH PEGMATITE. MASS OF STRINGERS INTRUDED INTO PSAMMITE. MINOR GREISEN. PEGMATITE NOT TOO COARSE. FELDSPARS 0mm IN SIZE. POSSIBLE SN02. OUTCROP APPROX. 4m THICK HERE. SAME PEG AS SITE 608503.	CHIP	PEG	OR17028462	0.16	7.78	36.4	40	152.5	0.44	0.02		2.08	1.5	4	61.4	1.2	0.69	18.25	0.1	1.4		1.75	1	5230	0.05	517	0.12	2.39	85	2.1	690	9.7	630			0.1
MIRE	68944	Dorchap Peg	EL5315	523694	5953087	708	GOSPORT		PEG	PEG			LARGE OUTCROP SAME DESCRIPTION AS SITE 608504. OUTCROP STRIKES ACROSS HILL TO SITE 608503.	CHIP	PEG	OR17028462	0.18	7.58	5.1	20	104.5	0.41	0.06		0.46	0.9	1	52.3	1	0.31	19.95	0.1	2.6		2.23		960	0.01	229		3.64	86.5	0.9	910	12.5	700			0.07
MIRE	68945	Dorchap Peg	EL5315	524226	5959573	930	WILSON TRACK		PEG		PEG		KNOLL OR 'BLOB' OF PEGMATITE SUBCROPPING OUT GROUND. SILICA RICH-MUSCOVITE. LITTLE FEOX STAINING. NO VISIBLE MINERALISATION. OUTCROP APPROX 3m WIDE	CHIP	PEG	OR17028462	0.1	7.16	14.6	30	5.84	0.39	0.03		2.59	0.7	2	28.2	1.2	0.41	18	0.09	1.7		1.47	1.8	43.4	0.02	204	0.11	4.51	62.2	1.6	790	12.3	500			0.1
MIRE	68946	Dorchap Peg	EL5315	524278	5959479	931	WILSON TRACK		PEG			PEG	PEG FLOAT SEEN IN BULLDOZED WINDROWS AT TRACK JUNCTION. PROBABLE STRIKE WITH PEGMATITE SEEN AT SITE 608506. QUARTZ HAS SUGARY TEXTURE	CHIP	PEG	OR17028462	0.11	7.61	78.9	50	13.65	3.51	0.09		6.14	0.8	2	23.5	0.6	0.42	24	0.1	1.9		1.42	6.4	41.3	0.02	176	0.08	3.83	91.4	1.5	1120	19.7	356			0.17
MIRE	68947	Dorchap Peg	EL5315	524235	5959794	891	WILSON TRACK		PEG	PEG			DYKE SEEN AT SMALL RISE IN WILSONS TRACK. OUTCROP STRIKES OFF HILL TO THE WEST AROUND 301° GRID AZI. OUTCROP TRACED TO GPS POINTS 81-2, 81-3, 81-4, 81-5 OUTCROP APPROX 3m WIDE	GRAB	PEG	OR17028462	0.12	8.5	15.8	30	4.92	0.48	0.13		1.01	0.5	2	45.4	1.1	0.47	26.9	0.09	2.1		2.67	0.6	65.9	0.01	441	0.05	3.9	90	0.7	2160	16.1	740		0.01	0.14
MIRE	68948	Dorchap Peg	EL5315	525563	5959619	852	SPRINGTIME LEASES		PEG	PEG			SMALL NARROW TRENCH/CUT ABOUT 15m LONG WITH A POSSIBLE COLLAPSED UNDERLIE SHAFT AT THE SOUTHERN END. WORKINGS AVERAGE 1.5-2m WIDE, MINING OUT PEG/GREISEN ZONE TO AROUND 3m IN DEPTH. MULLOCK SHOWS GREISEN, FELDSPAR, SERICITE (GREENISH), RARE SNO2 IN VUGS	CHIP	PEG	OR17028462	0.09	7.85	11.8	30	11.75	0.19	0.02		3.42	3	3	46.3	6.5	0.59	25	0.09	1.5		1.79	2.3	48	0.03	106	0.09	2.1	66.3	16.3	730	11.6	830			0.4
MIRE	68949	Dorchap Peg	EL5315	525570	5959587	851	SPRINGTIME LEASES		PEG			PEG	SITE OF DEEP SHAFT APPROX. 20m DEEP, SUNK ON SOUTHERLY STRIKE CONTINUATION OF PEGMATITE FROM SITE 608518. MULLOCK CONTAINS GREISEN PEG, COARSE GRAINED FELDSPAR, SERICITE/MUSCOVITE, COARSE SNO2 DISSEMINATED IN GREISEN.	GRAB	PEG	OR17028462	0.07	7.99	3.9	60	43.6	0.2	0.01		8.27	1.3	2	105.5	2	0.48	34.8	0.12	1		3.14	11.9	81.3	0.02	136	0.12	0.85	109	4	480	8.5	1650			0.09
MIRE	68951	Dorchap Peg	EL5315	526147	5954165	819	BLAIRS DYKES		PEG	PEG			DEEPER COSTEAN SUNK INTO PEG. OUTCROP ABOUT 2m THICK. SAMPLE TAKEN ACROSS EXPOSURE. PARTLY WEATHERED SCHISTS ON DYKE CONTACT. DYKE SEEMS TO PINCH OUT IN A S.E STRIKE FROM THIS SITE.	CHIP	PEG	OR17028462	0.05	7.52	6.9	20	112.5	0.28	0.04		0.52	0.2	2	28.3	0.5	0.37	18.15	0.06	1.1		2.09		2190		244	0.09	3.54	54.5	0.6	720	37.5	540			0.09
MIRE	68952	Dorchap Peg	EL5315	526104	5954207	821	BLAIRS DYKES		PEG_SN			PEG_SN	BOULDERS OF PEG BULLDOZED TO WEST SIDE OF TRACK. VISIBLE COARSE SNO2 WITH MUSCOVITE GREISEN (SAMPLED).	GRAB	PEG	OR17028462	0.01	8.06	36.2	60	133.5	0.11	0.06	0.05	1.37	1	2	47.4	2.2	0.45	32	0.08	3.6		1.4	0.9	57.6	0.01	181	0.06	4	157.5	2.1	810	21.2	740			0.9
MIRE	68953	Dorchap Peg	EL5315	524206	5949133	1123	EAGLE DYKE		PEG		PEG		SUB-OUTCROP OF PEG EXPOSED ON A SMALL HAIRPIN CORNER OF OLD FOREST TRACK. PEG IS IN STRIKE FROM RYAN EAGLES SPODUMENE OUTCROP. DYKE ABOUT 2m THICK	CHIP	PEG	OR17028462	0.05	8.64	34.5	180	35.2	0.43	0.15		16.15	0.8	6	72.8	0.9	0.66	24.3	0.12	2.2		3.53	7.6	98.3	0.09	309		3.08	65.8	2.1	1510	20.1	940			0.06
MIRE	68954	Dorchap Peg	EL5315	525722	5947731	1018	SCRUBBY CREEK		PEG		PEG		DYKE EXPOSED IN SMALL HUMP IN TRACK. LOCATION POSSIBLY THE 50ft DYKE AS SHOWN ON WHITELAWS MITTA MITTA MAP. DYKE LOOKS APPROX. 4-5m WIDE. SAMPLED RANDOM CHIPS ACROSS EXPOSURES OF DYKE IN ROAD. GREISEN, FELDSPAR, COARSE MUSCOVITE, STRIKE UNKNOWN, VERY DE	GRAB	PEG	OR17028462	0.04	7.86	15.8	60	5.45	0.6	0.13		1.6	1	2	28	13.4	0.73	22.2	0.08	1.5		1.73	1	5.7	0.02	282	0.12	4.04	77.2	1.5	1790	10.9	560			0.09
MCRE	68955	Dorchap Peg	EL006486	523554	5948187	1087	SCRUBBY CREEK		PEG		PEG		PROMINANT, LARGE 2.5-3m WIDE DYKE STRIKING ACROSS TRACK AT 277° (GRID AZI). LENGTH OF OUTCROP UNKNOWN, NOT TRACED DUE TO TIME/UNDERGROWTH. NO VISIBLE SNO2 MINERALISATION. MANGANESE ON FRACTURES	CHIP	PEG	OR17028462	0.07	8.29	3.8	30	103.5	0.63	0.12		1.1	0.3	2	35.3	1.5	0.49	19.85	0.07	0.8	0.015	2.41	0.5	135.5	0.02	290	0.06	3.59	67.1	0.5	1200	26	460			0.09
MIRE	68956	Dorchap Peg	EL5315	523938	5949229	1104	EAGLE DYKE	10	PEG	PEG			10M CHIP SAMPLE ACROSS DYKE IN ROAD CUTTING	CHIP	PEG	OR17072934	0.34	7.3	10.3	40	47.9	0.3	0.01	0.44	2.2	12.4	1	43.7	4.2	0.58	18.9		0.8		1.66	1	4430	0.02	1840	0.21	0.87	45.2	7.9	690	18.3	470			0.21
MIRE	68957	Dorchap Peg	EL5315	520003	5950993	591	MT ELMO TRACK		PEG	PEG			MICROGRANITIC' DYKEEXPOED HIGH UP ROAD CUT. 40-50% QTZ, 40% FELDSPAR (MILKY WHITE), 5% BIOTITE. OXIDISED SURFACE. OUTCROP CONTINUES THROUGH ROAD STRIKING 290DEG MAG.	GRAB	PEG	OR17072934	0.11	7.65	11.2	70	2.75	0.66	0.05	0.14	8.18	3.5	4	16.1	3.8	0.68	18.65		1.9	0.033	3.72	5	40.8	0.05	705	0.13	2.21	18.6	3.3	860	43.7	385			0.26
MCRE	68958	Dorchap Peg	EL006486	520114	5950983	615	MT ELMO TRACK	3.5	PEG	PEG			HOST ROCK CORDIERITE SCHISTS EXPOSED IN ROAD. PEG/DYKE APPROX 3-4m WIDE EXPOSED. FELDSPAR/MICA RICH (-/+ BIOTITE). FEOX VUGS. TOURMALINE PRESENT. OUTCROP STRIKES 296° MAG AZI	CHIP	PEG	AD19134696	0.1	4.99	9	40	1.32	0.81	6.59		4.36	1.4	6	6.51	13.6	1.27	9.56		0.5	0.2	3.46	2.4	12	4.51	445	0.4	1.06	5.8	3.1	750	36.3	273		0.01	0.19
MCRE	68959	Dorchap Peg	EL006486	520072	5951152	693	MT ELMO TRACK		PEG	PEG			LARGE PEGMATITE ON ROAD BEND. QZ CORE WITHIN PEGMATITE. FELDS 40%/QTZ 40%, 10% BIOTITE, MINOR TOURMALINE, WEATHERED FEOX STAINS	CHIP	PEG	AD19134696	0.03	8.31	8.2	30	3.08	0.58	0.06		1.97	4	4	11.5	5.6	0.56	21	0.05	1	0.028	3.87	1.7	18.9	0.04	647	0.59	2.88	21.7	3.8	1110	19.2	366			0.12
MCRE	68960	Dorchap Peg	EL006486	520872	5950756	961	MT ELMO TRACK		PEG	PEG			PEGMATITE APPROX 2-3M WIDE ON ROADSIDE AT SPOON DRAIN. FELDSPAR APPROX 60%, BIOTITE 5% (OXIDISED BLOCKS) AND HALOS. PEGMATITE WIDENS TO 4-5M UPSLOPE FOLLOWING OUTCROP. ????????. BEARING OF 166° MAG. HOST ROCK MICA SCHISTS / CORDIERITE SCHISTS.		PEG	OR17072934	0.76	7.21	89.4	30	5.54	2.09	0.08	0.3	1.48	0.5	2	31.3	5	0.75	25.5		2.3	0.221	2.27	0.7	29.5	0.01	663	0.14	3.76	262	1.3	2360	108.5	600			3.49
MIRE	68961	Dorchap Peg	EL5315	521382	5950369	1079	MT ELMO TRACK		PEG		PEG		PEGMATITE BOULDERS - PARTLY IN SUBCROP IN AND ON N SIDE OF ROAD. FELDSPAR 50%, QTZ 40%. COARSE MUSCOVITE 10-15%. BIOTITE (PARTLY OXIDISED). OUTCROP BEARING UNKNOWN.	GRAB	PEG	AD19134696	0.01	7.99	111.5	30	54.2	0.57	0.05		0.87	0.4	3	36.5	4.8	0.52	24.9		2.5		2.22		17.2	0.02	386	0.49	3.69	83.6	1.8	1070	20.5	570			0.2
MIRE	68962	Dorchap Peg	EL5315	521552	5950232	1112	MT ELMO TRACK		PEG	PEG			LARGE OUTCROP OF PEGMATITE ADJACENT TO TRACK. >5M IN WIDTH - SOME UP TO 10M ????????????????????????			OR17072934	0.22	7.51	35.7	50	4.06	0.47	0.16		4.88	0.8	4	33.2	4.3	0.89	25.1		1.4		1.78	2.4	48.1	0.03	601	0.14	3.18	87.9	2.2	1930	28.4	570			0.22
MIRE	68963	Dorchap Peg	EL5315	521594	5950181	1111	MT ELMO TRACK	2	PEG	PEG			PEG OUTCROP STRIKING APPROX 310° MAG. SEEMS TO OFFSHOOT FROM MAIN / LARGE OUTCROP OF 608541. APPROX 2M WIDE	CHIP	PEG	AD19134696	0.03	6.43	95.9	160	3.35	0.36	0.16		12.8	0.6	10	33.1	8.4	0.9	18.25		1.7	0.019	2.28	6.2	48.2	0.11	519	0.7	2.47	58.7	3.1	1610	20.1	421			0.29
MIRE	68964	Dorchap Peg	EL5315	522557	5948682	1114	MT ELMO TRACK		PEG	PEG			OUTCROP APPROX 6-6M WIDE EXPOSED ON SMALL SPUR AT EDGE OF TRACK. ZONED PEGMATITE WITH QTZ CORE, LARGE CRYSTALINE FELDSPAR AND MUSCOVITE. NO TOURMALINE SEEN.		PEG	OR17072934	0.12	7.82	20.3	40	9.29	0.86	0.17	0.26	0.69	0.8	2	57.4	1.8	0.66	23.7		0.7	0.005	3.72		33.3	0.01	368	0.1	2.54	69	1.6	2260	28.6	820			0.16
MCRE	68965	Quartz blow	EL006486	526674	5945640	970	DORCHAP RANGE TRACK		Qtz		QTZ		SMALL QTZ VEIN EXPOSED IN ROADSIDE ~ 1M WIDE. CRYSTALINE - SUB OPAQUE 'BUCK' / MOSAIC QTZ VEIN. HOST ROCKS - ?????? SHALES, METAMORPHIC ??????? ???????????		L1	OR17072934	0.02	0.2	2.2	10	0.42	0.01		0.02	3.06	0.6	3	0.76	3	0.77	0.64		0.1		0.03	2.5	33.8	0.01	107	0.22	0.02	1.4	2	30	4.8	7			0.1
MCRE	68966	Dorchap Peg	EL006486	526057	5945425	1017	DORCHAP RANGE TRACK		PEG				60% PLAG????, 30% QTZ, MICA (ALT. SERICITE). FEOX STAINS ON FRACTURES. OUTCROP TRUE WIDTH AT ROADSIDE >5M. HOST ROCK - SHALES WITH SLIGHT MICA ALT. POSSIBLE SN02 OR MANGANESE BLOTCHES WITHIN PEG.		PEG	OR17072934	0.14	7.38	9.1	20	9.25	0.65	0.06	0.14	0.94	0.4	2	41	10.4	0.6	22.9		2.9		2.73		118	0.01	512	0.93	2.68	70.1	1.3	1660	17.6	860			0.11
MCRE	68967	Dorchap Peg	EL006486	526063	5945396	1026	DORCHAP RANGE TRACK	5	PEG	PEG			ALONG STRIKE ON PEGMATITE OUTCROP AS 608545. FELDSPA, LESS QTZ, MICA, (FEOX) ALT BIOTITE?	CHIP	PEG	AD19134696	0.03	8.17	2.7	30	2.76	0.81	0.07	0.65	0.61	1.3	3	34.6	7.1	0.65	20.2		0.3	0.019	4.55		56.5	0.01	1580	0.84	2.27	41.1	2.4	2390	20.8	1020			0.14
MCRE	68968	Dorchap Peg	EL006486	526051	5945443	1016	DORCHAP RANGE TRACK	5	PEG	PEG			NORTH CONTINUATION (STRIKE) OF PEG AS SEEN AT 608545. MULTIPLE ZONATIONS WITHIN PEG. COARSE MUSCOVITE, FELDSPAR. FEOX STAINED BIOTITE, MICROGRANITIC IN PARTS. HOST ROCKS SHALES WITH LOCALISED CORDIERITE SCHIST.	CHIP	PEG	AD19134696	0.05	8.93	1.5	10	97.8	0.28	0.18	0.02	0.69	0.4	3	107.5	3.6	0.5	29.8		2.9	0.012	2.63		140	0.05	293	0.65	4.72	134.5	2.3	2740	18.2	1300	0.002		0.16
MCRE	68969	Dorchap Peg	EL006486	525873	5945414	1027	DORCHAP RANGE TRACK		PEG				OUTCROP PARALLEL TO 608547. OUTCROP ABOUT 3M WIDE. MEDIUM GRAINED MUSCOVITE, FELDSPAR, BIOTITE. HOST ROCK SHALES, LOCAL CORDIERITE SCHISTS.		PEG	OR17072934	0.09	7.05	41.1	40	6.98	0.32	0.04	0.3	1.1	0.5	1	34	4.6	0.47	21.3		2.9	0.011	1.89		16	0.01	447	0.14	4.1	80.2	1.5	1580	24.2	490			0.1
MCRE	68970	Dorchap Peg	EL006486	524447	5946803	999	DORCHAP RANGE TRACK	0.8	PEG	PEG			COARSE GRAINED FELDSPAR (50%), QTZ (25%), MICA (COARSE FLAKES). PEGMATITE ~2M WIDE. PEG IS INTERBEDDED WITH WHAT LOOKS LIKE A DOLERITE DYKE. STRIKE OF OUTCROP 298° MAG. OUTCROP CONT IN ROAD TO SE BUT NARROWS TO M WIDE. HOST ROCK - INTERBEDDED MICA SCH	CHIP	PEG	AD19134696	0.07	8.33	10.6	80	3.59	1.79	0.09		3.5	0.8	8	34.1	18.5	0.8	23.7	0.05	2.2	0.007	2.67	1.6	20.9	0.06	558	0.98	3.76	53.9	4.4	1590	18.1	520			0.17
MIRE	68971	Dorchap Peg	EL5315	524294	5947175	991	DORCHAP RANGE TRACK		PEG				COARSE GRAINED PEG. MUSOVITE, FELDSPAR, STRIKING 295° MAG.		PEG	OR17072934	0.16	7.07	7.9	30	11.75	0.29	0.16	0.08	0.57	0.8	2	42	1.8	0.59	27.8		1.1	0.009	1.84		36.4	0.01	446	0.08	3.16	114.5	1.6	2080	18.3	630			0.1
MIRE	68973	Dorchap Peg	EL5315	524009	5947520	1025	DORCHAP RANGE TRACK		PEG				FELDSPAR 60%, QTZ 30%, MED GRAINED MUSCOVITE 10%. ???? OF FELDSPAR.		PEG	OR17072934	0.07	8.4	43.4	90	10.5	0.48	0.08	0.04	2.29	0.7	2	36.2	4.5	0.8	24.8	0.05	1.5		2.51	1.1	22.7	0.01	209	0.12	3.67	73.3	2.3	2020	20.5	650			0.14
MIRE	68974	Dorchap Peg	EL5315	517804	5949513	657	BOWMAN NO. 2		PEG				PEG WITH VARYING CRYSTAL SIZES. FELDSPAR 60%, QTZ 30%, MED/COARSE MUSCOVITE 10-15%. TOURMALINE CRYSTALS COMMON. PEG STRIKES ???? AT 276° MAG, ~3M WIDE. HOST ROCK CORDIERITE SCHISTS / MICACEOUS SHALES.		PEG	OR17072934	0.09	7.35	7.9	20	1.81	1.68	0.12	0.09	7.15	0.7	2	11.6	7.8	0.68	17.75	0.05	1.4	0.034	2.18	3.4	28	0.05	638	0.08	2.98	13	2	740	18.2	249			0.13
MIRE	68975	Dorchap Peg	EL5315	517674	5949458	677	BOWMAN NO. 2	4	GRN	GRN			GRANITE (WITH PEGMATITIC ZONES) OF LARGE OUTCROP ~4M WIDE ON INSIDE BEND OF TRACK. HOST ROCK CORDIERITE SCHISTS WITH LOCALISED MICA SCHISTS. MED GRAINED FELDSPATHIC OUTCROP, TOURMALINE CRYSTALS TO 5MM SIZE. COMMON SIZES, ESPECIALLY IN COARSER GRAINED OU	CHIP	GRN	AD19134696	0.05	7.11	4.4	40	1.88	0.9	0.08	0.04	3.69	0.7	6	9.72	6.8	0.88	17.05		1.2	0.035	2.58	1.8	25.1	0.05	548	1.17	2.68	15.1	4	480	18.9	246			0.2
MIRE		Dorchap Peg	EL5315	517672	5949657	705	BOWMAN NO. 2	2	GRN	GRN			SMALL OUTCROP OF ~2M WIDE 'GRANITE' MICROGRANITE. FELDSPAR / QTZ, MED GRAINED MUSCOVITE. TOURMALINE CRYSTALS ARE VISABLE.			AD19134696	0.05	6.36	8.4	10	0.96	1.74	0.07		2.7	1.1	4	11.5	5.9	0.53	14.25	0.05	0.7	0.036	3.51	1.7	9.6	0.02	122	0.72	1.87	10.7	2.8	610	18.2	347			0.3
MIRE	68977	Dorchap Peg	EL5315	516842	5951113	1031	BOWMAN NO. 2						KNOLL' OF GRANITE BOULDERS IN SITU. K-SPAR RICH GRANITE 60%, QTZ 30%, MED GRAINED TOURMALINE CRYSTALS VERY COMMON AND PATCHY THROUGHOUT MATRIX. KNOLL FORMS A SMALL SADDLE. POSSIBLE GRANITE PLUG/INTRUSION AT THIS POINT.		GRN	OR17072934	0.05	7.71	21.1	10	2.7	1.22	0.1	0.05	3.23	0.5	1	20.5	4.5	0.63	17.55		1	0.026	2.82	1.5	19.4	0.03	466	0.12	3.09	13.1	1.2	1010	18.1	316			0.2
MIRE	68978	Dorchap Peg	EL5315	516285	5950977	1069	BOWMAN NO. 2						50% QTZ, 40% FELDSPAR, VARIABLE AMOUNTS OF MICA, BIOTITE, SMALL CRYSTALS OF TOURMALINE. ONE ROCK MAY HAVE OXIDISED CASSITERITE OR TOURMALINE?? (SAMPLED).		GRN	OR17072934	0.07	7.35	83.6	10	1.29	1.35	0.1	0.07	3.37	0.4	1	15.95	4.4	0.67	16.35		1.1	0.033	2.83	1.6	25.3	0.03	426	0.12	2.89	9.4	1	950	19.6	288			0.19
MIRE	68979	Dorchap Peg	EL5315	515071	5950900	1093	ESKDALE SPUR TRACK						MED/COARSE GRANITE OUTCROP, 6-10M WIDE AT THIS POINT. K-SPAR 20%, FELDSPAR 30%, QTZ 40%, MICA (MUSCOVITE). SMALL CRYSTALS OF TOURMALINE. K-SPAR OXIDISED ON SURFACE. GRANITE OUTCROP DOES NOT EXTEND ACROSS TRACK ALONG STRIKE.		GRN	OR17072934	0.68	7.48	183	60	1.44	2.99	0.07	0.06	2.17	0.6	3	11.15	4.3	1.01	15.55	0.05	0.5	0.03	4.47	1	9.2	0.05	227	0.11	2.02	10.2	1.8	1010	68.7	401			0.21
MIRE	68981	Dorchap Peg	EL5315	515337	5949541	1085	ESKDALE SPUR TRACK	6	GRN	GRN			COARSER PEG AT THIS LOCATION COMPARED TO 608563. CRYSTALS OF WHITE QTZ (5-10CM DIAMETER) LRG MUSCOVITE FLAKES FELDSPAR. MINOR ZONATIONS OF SMALLER TOURMALINE CRYSTALS ADJACENT TO QTZ RICH AREAS AT PEG. RANDOM GARNET? NOTED, CRYSTAL FORM/HABIT, BUT ALTER	CHIP	PEG	AD19134696	0.02	8	14.2	40	3.57	0.35	0.11		2.5	0.4	5	53.3	5.8	0.69	22.3		2.2	0.015	2.7	1.3	42.4	0.03	609	0.45	3.11	42	2	1670	15.2	710			0.17
MIRE	68982	Dorchap Peg	EL5315	515356	5949484	1081	ESKDALE SPUR TRACK						ALONG STRIKE TO SOUTH OF SITE 608564. VERY COARSE MUSCOVITE IN OUTCROP (SAMPLED). COARSE FELDSPAR. MINOR VUGS OF FEOX AFTER ???? SULPHIDE WITHIN FELDSPAR RICH PART OF OUTCROP.		PEG	OR17072934	0.07	7.91	35.3	100	5.79	0.25	0.17		6.64	0.6	7	186	8.3	0.94	23.8	0.06	1.7	0.018	3.33	3.2	117.5	0.08	376	0.11	2.88	45	1.7	1920	17.8	1150			0.16
UNK	68983	Dorchap Peg	OUT	515277	5946737	1105	ESKDALE SPUR TRACK	8	GRN	GRN			UNDIFFERENTIATED GRANITE OUTCROP ALONG ROAD. VERY WIDE >8M . FELDSPAR/QTZ/TOURMALINE.	CHIP	GRN	AD19134696	0.03	5.22	22.3		0.67	0.75	0.11		2.73	0.5	6	5.75	7.5	0.78	11.4		0.8	0.023	2.08	1.3	13	0.02	155	1.15	2.12	9.9	3.7	660	12.7	166.5			0.15
MCRE	68984	Dorchap Peg	EL006486	517332	5944239	1046	ESKDALE SPUR TRACK						OUTCROP SUB-PARALLEL TO TRACK. GRANITE TO PEGMATITIC TEXTURE. FELDSPAR, GRANITE, BIOTITE?, TOURMALINE.		PEG	OR17072934	0.03	7.7	2.8	270	1.32	2	0.18	0.03	14.85	2.2	5	4.81	6.6	0.83	15.25	0.06	0.9	0.024	4.27	8.2	18.3	0.14	123	0.1	1.02	4.3	3.8	480	51.4	171			0.2
MCRE	68985	Dorchap Peg	EL006486	518467	5942804	1037	ESKDALE SPUR TRACK						GRANITIC/PERMATITIC OUTCROP CUTS ACROSS ROAD ~3M WIDE. FELDSPAR/QTZ/BIOTITE.		GRN	OR17072934	0.05	7.09	3	360	1.45	1.51	0.3	0.27	12.4	2.4	2	4.42	7.7	0.53	14.35	0.13	0.5	0.015	3.81	6.2	16.3	0.08	92	0.07	1.02	3.3	2	460	113.5	161.5		0.01	0.1
MCRE	68986	Dorchap Peg	EL006486	522756	5941617	1146	ESKDALE SPUR TRACK								GRN	OR17072934	0.05	6.89	28.9	30	1.67	2.56	0.12	0.19	5.17	0.4	2	33.3	13.5	0.58	19.25	0.08	1.1	0.046	3.05	2.4	14	0.04	171	0.06	2.3	16.6	1	690	85.2	295		0.01	0.13
MCRE	68987	Granofels	EL006486	523961	5941348	1214	POWERLINE								GRN	OR17072934	0.28	7.83	67.5	90	1.6	3.54	0.05	0.06	3.82	0.6	2	8.54	12.7	0.95	19.85		1.1	0.064	2.39	1.7	13.8	0.07	273	0.13	2.1	13.4	1.6	960	33.3	233			0.22
MCRE	68988	Dorchap Peg	EL006486	524351	5942668	1199	POWERLINE	5	PEG	PEG			ALONG STRIKE IN OUTCROP FROM SAMPLE 68987 (TAGGED), K-SPAR, MUSCOVITE, FEOX, TOURMALINE, QTZ. OUTCROP 4-6m WIDE	CHIP	PEG	AD19134696	0.03	7.79	25.1	60	3.31	0.44	0.27	0.59	1.39	0.6	5	24.3	5.3	1.12	23.3		0.9	0.028	2.04	0.6	150	0.03	1180	1.04	3.24	42.2	3.6	3610	16.9	460			0.23
MCRE	68989	Dorchap Peg	EL006486	524350	5942655	1206	POWERLINE	5	PEG	PEG			FELDSPAR 60%, QTZ 30%, MED GRAINED MUSCOVITE. FELDSPAR ALT ORANGE-CREAM COLOURS IN PATCHES, +/- TOURMALINE, +/- SPODUMENE? RANDOM FEOX VUGS AFTER SULPHIDES	CHIP	PEG	AD19134696	0.04	7.48	7.2	20	3.19	1.76	0.07	0.21	0.82	0.3	6	10.9	11.3	0.77	21.1	0.05	0.7	0.026	2.08		40.9	0.02	584	0.53	3.65	29.8	2	2090	63.7	384			0.15
MCRE	68990	Granofels	EL006486	524034	5941479	1216	POWERLINE								PEG	OR17072934	0.31	7.12	17.3	50	1.19	6.64	0.1	0.06	1.66	0.3	1	11.4	14.4	0.71	16.8	0.05	0.7	0.06	3.8	0.7	7.8	0.03	238	0.14	2.43	15.1	0.9	1030	52.4	344			0.19
MCRE	68991	Dorchap Peg	EL006486	520563	5941755	1306	LITTLE SNOWY TRACK	6	GRN	GRN			MASSIVE GRANITIC-PEGMATITIC OUTCROP AT TRACK JUNCTION. TOURMALINE PRESENT?	CHIP	GRN	AD19134696	0.03	7.07	2.3	50	0.49	1.07	0.1	0.05	2.28	0.6	4	5.5	4.7	0.69	12.9		1	0.015	3.64	1	4.1	0.03	318	0.77	2.61	5.2	2.8	1190	17.7	222	0.002		0.11
MIRE	68992	Dorchap Peg	EL5315	526530	5948360	933	SCRUBBY SPUR TRACK		PEG	PEG			SAMPLES WERE TAKEN FROM PEGMATITE DOWNHILL TO THE WEST OF THIS SPOT IN FIRST SAMPLING CAMPAIGN (JAN 2017). THIS SAMPLE TAKEN AT PEGMATITE/ALT SANDSTONE BOULDERS FROM OUTCROP AT EDGE OF TRACK	CHIP	PEG	AD19134696		7.83	1.8	20	14.05	0.2	0.11		0.64	0.4	4	30	10.7	0.44	24.1		0.9		1.78		15.3	0.01	162	0.53	3.81	96.6	2.5	1150	9	570			0.17
MCRE	68993	Dorchap Peg	EL006486	527685	5946778	846	TRAPPERS GAP ROAD								PEG	OR17072934	0.08	6.15	50.9	10	4.3	0.24	0.09	0.09	1.05	0.4	1	23.2	3.5	0.47	18.45		0.7		1.56		62.5	0.01	476	0.08	3.02	34.9	0.9	1770	12.3	520			0.09
MCRE	68994	Dorchap Peg	EL006486	527697	5946787	849	TRAPPERS GAP ROAD								PEG	OR17072934	0.02	7.69	2.1	20	11.05	0.97	0.17	0.49	0.85	0.5	1	25	10.6	0.42	22.4		1.6		1.81		74.2	0.01	830	0.07	4.24	101.5	0.9	1960	12	620			0.08
MCRE	68995	Dorchap Peg	EL006486	527688	5946763	876	TRAPPERS GAP ROAD	10	PEG	PEG			QTZ RICH, FELDSPAR, COARSE MUSCOVITE. NEARBY CONTACT WITH HOST SCHISTS, INCLUSIONS OF PEG WITHIN SCHIST BOULDERS. OXIDISED SURFACE	CHIP	PEG	AD19134696		8.01	13.6	100	11.15	0.27	0.22		6.44	0.6	9	128	4.5	0.9	35.7	0.05	1.2		3.31	3.6	328	0.1	301	0.54	0.91	77.3	3	1310	7.7	1390			0.18
MCRE	68996	Dorchap Peg	EL006486	527669	5946782	871	TRAPPERS GAP ROAD								PEG	OR17072934	0.03	7.09	9.4	30	3.93	0.86	0.15		3.36	0.3	3	53.4	2.2	0.37	18.25		1.4		2.95	1.5	63.1	0.02	419	0.09	4.11	39.2	1.5	2020	19.5	910			0.09
MCRE	68997	Dorchap Peg	EL006486	527678	5946769	866	TRAPPERS GAP ROAD	10	PEG	PEG			MED CRYSTALLINE PEGMATITE ON TOP OF OUTCROP (PHOTO). SIMILAR LITHOLOGY AS OF SITE 608579. RANDOM BIOTITE? HALOES. PARTLY OXIDISED FELDSPAR MATRIX. COARSE GRAINED GREISSEN MUSCOVITE	CHIP	PEG	AD19134696	0.03	8.11	4.9	40	17	0.41	0.16		0.94	0.5	5	34	6.6	0.52	22	0.05	1	0.013	1.48	0.5	47.8	0.02	364	0.65	4.71	75.9	3	1450	8.3	520			0.14
MCRE	68998	Dorchap Peg	EL006486	524332	5946473	1116	SHORTCUT TRACK	3	PEG	PEG			FINE GRAINED FELDSPATHIC MATRIX,APPROX 3m WIDE (INFERRED). LENGTH OF OUTCROP NOT VISIBLE.MINOR QZ, PARTLY FOLIATED BIOTITE.		PEG	AD19134696	0.04	8.09	9.1	30	6.45	0.87	0.07		1.87	0.7	4	33.7	4.4	0.51	21.4	0.05	1.5	0.008	2.6	0.9	16.9	0.01	323	0.68	3.24	49.2	4.4	1330	19.5	580	0.002		0.18
MCRE	68999	Dorchap Peg	EL006486	524341	5946458	1116	SHORTCUT TRACK		PEG	PEG	PEG		SUB-OUTCROP OF PEG /FELSIC DYKE EXPOSED AT SLIGHT RISE IN TRACK. SAMPLE TAKEN FROM EDGE OF TRACK. MED-COARSE GRAINED PEG, MUSCOVITE, FEOX ALT (AFTER BIOTITE OR MANGANESE?), NO TOURMALINE VISIBLE	GRAB	PEG	AD19134696	0.02	8.28	12.1	30	5.25	0.22	0.05	0.5	0.58	0.8	5	20.1	4.3	0.55	22.4	0.05	1	0.014	2.59		25.9	0.01	612	0.59	3.62	80.5	4	2190	15.8	530			0.16
MCRE	69000	Dorchap Peg	EL006486	523464	5946713	947	SHORTCUT TRACK		PEG	PEG		PEG	OUTCROP NOT SEEN. FLOAT/BOULDERS BULLDOZED OUT FROM TRACK. MED-GRAINED PEG, COARSE MUSCOVITE, WEATHERED FEOX, MANGANESE STAINING/SNO2?	GRAB	PEG	AD19134696	0.02	8.76	18.5	60	7.17	0.3	0.22	0.32	1.95	1.5	4	18.6	6.1	0.86	26.5		1.7	0.005	1.64	1.1	38.9	0.02	986	0.77	3.9	112.5	4.9	3430	13.8	411			0.15
MIRE	69001	Dorchap Peg	EL5315	522945	5946657	906	SHORTCUT TRACK		PEG	PEG			SAME LITHOLOGY AS SITE 608585. MINOR ZONATION OF COARSE FELDSPAR WITH CRYSTALS OF TOURMALINE, FEOX STAINING, ORANGE-CREAM ALTERATION, KAOLIN ALT.	CHIP	PEG	AD19134696	0.01	7.67	48.4	20	2.68	0.98	0.04		1.07	0.9	3	15.6	7.3	0.73	21.8	0.06	0.5	0.019	2.08	0.6	19	0.02	827	0.66	3.06	33.2	3.7	790	9.7	421			0.19
MIRE	69002	Dorchap Peg	EL5315	521912	5946819	656	SHORTCUT TRACK	2	PEG	PEG			LOCATED JUST UPTRACK FROM LITTLE SNOWY CK. BULLDOZED DYKE >2m WIDE. EXTENT ALONG STRIKE UNKNOWN. FELSIC, COARSE MUSCOVITE, MN OR BIOTITE? SIMILAR TO 608586	GRAB	PEG	AD19134696	0.02	8.51	6.5	20	2.89	1.27	0.04		2.22	0.7	3	16.95	9	0.5	21.3		0.8	0.026	4.05	1.1	24.8	0.03	329	0.37	2.89	29.1	1.7	950	24	470			0.28
MCRE	69003	Dorchap Peg	EL006486	521232	5943655	1077	LITTLE SNOWY TRACK									OR17072934	0.11	7.33	62.4	40	1.28	0.97	0.11	0.12	2.25	0.4	2	16.45	4.4	0.81	16.8		0.9	0.03	2.94	1	14	0.03	704	0.09	2.94	14.4	0.9	960	15.5	343			0.12
MCRE	69004	Dorchap Peg	EL006486	521227	5943636	1075	LITTLE SNOWY TRACK		PEG			PEG	RANDOM PEGMATITIC BOULDERS THROUGHOUT TRACK, EVIDENTLY BULLDOZED FROM OUTCROP AS SEEN AT 608590. COARSE MUSCOVITE, FELDSPAR, SERICITIC GROUNDMASS	GRAB	PEG	AD19134696	0.07	7.71	30.8	90	1.97	0.91	0.08	0.02	2.38	1.4	6	21.6	6.6	0.75	17.2		0.8	0.035	4.16	1	15.4	0.02	787	0.87	2.28	32.8	4	980	14.1	510			0.16
MCRE	69005	Dorchap Peg	EL006486	520777	5942753	1150	LITTLE SNOWY TRACK								GRN	OR17072934	0.08	6.97	42.2	10	2.42	0.9	0.11	0.08	1.76	0.5	2	10.9	5	0.95	17.6		0.6	0.025	2.7	0.8	20	0.04	341	0.14	2.73	20.6	1.2	1020	19.6	298			0.13
MIRE	69006	Dorchap Peg	EL5315	523803	5952620	692	GOSPORT								PEG	OR17072934	0.08	9.09	31.1	50	21.2	0.24	0.05	0.07	4.86	1.1	3	106.5	1.2	0.43	32.2		1.6	0.065	2.8	2.6	292	0.03	137	0.1	3.86	104	2	880	17.1	1235			0.1
MIRE	69007	Dorchap Peg	EL5315	523818	5952615	695	GOSPORT								PEG	OR17072934	0.04	8.19	6.4	40	37.8	0.19	0.01	0.02	0.38	0.4	1	68.2	1	0.33	19.25		1.9		3.18		1060	0.01	145	0.08	2.91	55.9	1.2	400	8	1150			0.18
MIRE	69008	Dorchap Peg	EL5315	523855	5952607	705	GOSPORT								PEG	OR17072934	0.05	8.31	4.3	10	3.4	0.14	0.05	0.13	0.65	0.4	1	47.5	1	0.42	17		0.5		4.38		102		327	0.11	3.42	53.8	0.7	1430	16.4	1210			0.11
MIRE	69009	Dorchap Peg	EL5315	523868	5952608	709	GOSPORT								PEG	OR17072934	0.15	7.49	30.8	20	3.73	1.18	0.03	0.51	1.49	1.1	1	22.4	1.6	0.5	22.8		1.3		1.8	1	113.5		886	0.09	3.87	71.3	0.7	1270	8	500			0.08
MIRE	69010	Dorchap Peg	EL5315	523830	5952598	703	GOSPORT								PEG	OR17072934	0.07	6.66	3.1	10	5.4	0.26	0.01		0.2	0.8	1	28.1	1.1	0.36	12.15		0.4		1.77		5940	0.01	308	0.08	1.9	36.1	1.4	350	7.4	620			0.18
SRE	69011	Dorchap Peg	EL006300	514514	5966117	674	STEELS TRACK								GRN	OR17072934	0.02	8.03	2.1	220	0.86	0.79	0.11		6.67	0.8	4	4.08	6	0.64	14.25		0.9	0.009	4.7	3.4	18.8	0.03	111	0.17	1.04	2.6	2.5	670	53	192.5			0.07
SRE	69012	Dorchap Peg	EL006300	514211	5965995	743	STEELS TRACK								GRN	OR17072934	0.02	7.29	61.3	40	0.81	1.66	0.16	0.08	3.28	0.7	2	3.01	5	0.65	13.9		0.7	0.01	3.61	1.8	9.8	0.03	298	0.11	2.06	2.9	1.6	850	41.4	172.5			0.11
UNK	69013	Dorchap Peg	OUT	513177	5965971	979	STEELS TRACK								GRN	OR17072934	0.07	7.81	12.7	90	0.61	2.35	0.19	0.03	3.3	0.9	2	9.7	3.1	0.72	16		0.4	0.051	4.55	1.8	27.6	0.06	144	0.14	1.82	8.5	1.3	790	45.6	251			0.07
UNK	69014	Dorchap Peg	OUT	511056	5965533	856	ESKDALE SPUR TRACK								GRN	OR17072934	0.06	7.62	5.5	90	0.89	1.24	0.16	0.05	3.1	1	2	6.34	3.9	0.64	13.95		1.1	0.011	3.98	2	11.9	0.04	273	0.09	2.48	3.5	1.4	910	31.9	259			0.05
UNK	69015	Dorchap Peg	OUT	510972	5964366	954	ESKDALE SPUR TRACK								GRN	OR17072934	0.03	7.43	6.1	20	1.11	0.56	0.12	0.18	2.25	0.3	2	13.45	1.4	0.85	16.05		1.1	0.019	3.15	1	23.1	0.04	1070	0.09	2.88	7.5	0.7	1020	19	268			0.09
MIRE	69016	Dorchap Peg	EL5315	511279	5958632	1043	FLUERTYS TRACK									OR17072934	0.14	7.37	32.1		1.14	0.44	0.09	0.15	2.96	0.4	2	40.7	3.6	1.17	16.15		1.2	0.016	2.62	1.2	40.5	0.04	897	0.19	3.15	6.7	1.1	1370	12.1	326			0.4
MIRE	69017	Dorchap Peg	EL5315	511459	5957021	1232	ESKDALE SPUR TRACK								GRN	OR17072934	0.06	6.77	9.4	10	1.93	0.65	0.1	0.08	2.15	0.4	2	13.5	4.3	0.8	14.55		0.7	0.016	2.98	1	22.8	0.04	494	0.21	2.69	9.1	1.3	1110	21.3	266			0.15
MIRE	69018	Dorchap Peg	EL5315	533710	5942208	1115	HOLLOW TRACK								PEG	OR17072934	0.14	5.66	4.8	30	5.16	0.12	0.09	0.66	0.54	0.5	1	25.6	4.2	0.43	24.2	0.14	0.5		1.9	0.5	90.8	0.01	673	0.11	3.02	54.1	1.8	1840	7.6	600			0.11
MIRE	69019	Dorchap Peg	EL5315	533705	5942224	1114	HOLLOW TRACK								PEG-SN	OR17072934	0.12	5.77	4.3	10	4.33	0.16	0.13	0.04	0.27	0.3	1	34.7	1	0.4	19.2	0.05	0.4		2.13		60.1		505	0.07	3.64	44.7	0.8	1930	7.1	750			0.1
MIRE	69020	Dorchap Peg	EL5315	533732	5942188	1113	HOLLOW TRACK		PEG			PEG	PEG FLOAT FROM THE COLLAR OF A LARGE MINE SHAFT (20FT DEEP). BOULDERY PEGMATITE. FELSIC, SUGARY TEXTURE, GREEN (SERICITE)MICA. RANDOM SPOTTED BIOTITE.	GRAB	PEG	AD19134696	0.09	8.63	3.4	20	26.5	1	0.14	0.34	0.74	0.7	3	35.5	3.2	0.46	22	0.05	2.2	0.029	2.33	0.8	50.4	0.01	300	0.51	4.13	87.6	2.8	2000	13	770			0.15
MIRE	69021	Dorchap Peg	EL5315	533000	5940583	1253	HOLLOW TRACK								PEG	OR17072934	0.09	6.24	5.3	20	2.87	0.2	0.08	0.37	1.63	0.6	2	15.5	54.1	0.74	16.7		1.1	0.018	2.26	0.7	31.7	0.02	1430	0.24	3.4	12.7	1.1	1620	11.9	369		0.01	0.11
MIRE	69022	Dorchap Peg	EL5315	532872	5940550	1266	HOLLOW TRACK	4	PEG	PEG			OUTCROP APPROX 4m WIDE STRIKING AROUND 280° MAG AZI. CLASSIC PEGMATITE TEXTURES. FELSIC ALT HALO, CENTRAL DARK OPAQUE QTZ CORE, SUB GRANITIC TEXTURES AT DYKE FRINGES.	CHIP	LI	AD19134696	0.08	6.79	63.7	10	1.25	0.67	0.05	0.07	1.81	0.7	7	12.65	14.4	0.77	19.35		1	0.052	3	0.8	16.2	0.03	572	0.66	2.39	19.2	3.3	1240	12.7	402			0.28
MIRE	69023	Dorchap Peg	EL5315	532738	5940429	1287	HOLLOW TRACK								GRN	OR17072934	0.13	6.07	15.7	10	1.68	0.79	0.08	0.04	2.79	0.6	1	15.05	5.6	0.85	18.2	0.06	1.2	0.046	1.9	1.2	29.1	0.04	227	0.2	2.75	12	4.6	1090	14.2	238			0.34
MCRE	69024	Mt Wills Granite	EL006486	532862	5939695	1334	HOLLOW TRACK								GRN	OR17072934	0.04	6.9	2.7	140	1.77	1.04	0.22	0.1	22.5	2.1	5	13.7	24.5	1.37	19.2	0.15	1.7	0.072	3.87	10.9	31.9	0.14	194	0.23	1.6	12	3.2	690	67.8	283		0.01	0.11
MCRE	69025	Mt Wills Granite	EL006486	531218	5938232	1313	HOLLOW TRACK									OR17072934	0.07	6.95	86.6	40	0.69	2.55	0.44	0.18	4.91	0.9	1	8.43	2.7	0.52	15.8	0.09	0.5	0.012	3	2.4	26.8	0.05	101	0.06	2.53	3.3	1.6	700	68.5	150		0.01	0.08
MCRE	69026	Dorchap Peg	EL006486	538532	5936145	718	SNOWY LOG ROAD									OR17072934	0.01	7.19	5.1	160	1.77	4.08	0.14	0.12	24.8	1.8	5	14.8	20.3	1.18	19.85	0.14	1.9	0.058	3.99	12.6	7.8	0.15	167	0.16	1.6	12.7	2.6	750	51	300		0.01	0.17
UNK	69027	Mt Wills Granite	OUT	537397	5933683	983										OR17072934	0.03	7.33	4.4	140	0.88	1.17	0.13	0.11	32.8	3.8	8	4.62	9.4	1.42	20.3	0.14	2.4	0.061	2.95	15.7	4.3	0.16	150	0.21	2.31	11.9	3.6	790	60	197.5		0.01	0.23
SRE	69028	Dorchap Peg	EL006300	519040	5957802	356										OR17072934	0.07	7.2	37	70	1.5	0.46	0.17	0.07	4	0.5	1	17.5	1.9	0.6	13.75	0.06	0.7	0.013	3.96	2.3	49.9	0.04	344	0.13	2.68	5.8	1.1	1000	44.4	264		0.02	0.07
SRE	69029	Dorchap Peg	EL006300	519094	5957534	375	DIGGERS CREEK TRACK	4	PEG	PEG			TOURMALINE RICH PEGMATITE. PARTLY WEATHERED	GRAB	PEG	AD19134696	0.05	7.69	37.2	10	1.35	3.42	0.13	0.11	3.44	0.5	4	9.36	5.5	0.82	17.55	0.05	1.3	0.025	3.58	1.6	16.6	0.03	1170	0.78	2.66	11.8	3	790	26.6	286			0.17
SRE	69030	Dorchap Peg	EL006300	521429	5955833	447										OR17072934	0.05	7.37	41.6	20	3.79	0.66	0.07	0.09	2.17	0.8	2	16.25	4.7	0.88	16.4	0.07	1.1	0.017	3.76	1.1	18.2	0.02	877	0.19	2.83	9.8	2.2	1350	19.9	460			0.13
SRE	69031	Dorchap Peg	EL006300	521578	5955811	459	DIGGERS CREEK TRACK	3	GRN	GRN			ROCK CHIPS SHOW OUTCROP TO BE MORE GRANITIC IN COMPOSITION. MINOR PEG ZONES, NO TOURMALINE SEEN, SLIGHTLY SERICITIC, APPROX 3m WIDE STRIKING 280° MAG AZI	CHIP	GRN	AD19134696	0.07	7.14	19.4	10	2.47	0.99	0.07	0.08	3.35	0.7	4	11.3	4.5	0.65	18.05	0.05	1.1	0.033	2.6	2.9	13.5	0.02	735	0.74	3.06	13.5	3.2	770	12.5	351			0.15
MIRE	69032	Dorchap Peg	EL5315	522949	5955544	474										OR17072934	0.31	6.18	9.3	580	10.7	1.69	0.12	0.13	0.67	0.3	2	32.8	2.3	0.71	22.2	0.06	1.2		2.1		99.1		785	0.1	3.37	61.8	0.8	2840	49.6	650			0.2
MIRE	69033	Dorchap Peg	EL5315	523111	5955466	483	DIGGERS CREEK TRACK	5	GRN	GRN			GRANITE/PEGMATITE OUTCROP WITH SIMILAR LITHOLOGY AS SITE 608636. OUTCROP 5m WIDE. FEOX STAINED, MANGANESE STAINING	CHIP	GRN	AD19134696	0.09	8.13	40.5	20	6.09	1.33	0.06	0.95	1.14	0.3	4	41.8	3.3	0.92	34.2	0.05	3.5	0.034	2.2	0.5	560	0.01	1270	0.41	3.05	87.8	3.2	3710	7.4	780			0.2
MIRE	69034	Dorchap Peg	EL5315	524084	5949111	1150	EAGLE DYKE		PEG.	PEG.					PEG	OR17072934	0.03	6.45	30.1	30	97.4	0.13	0.08		0.28	0.2	2	69.7	1.7	0.49	19.25	0.08	1		2.98		130	0.01	254	0.1	3.06	57.4	1	1120	36.9	920			0.16
MIRE	69035	Dorchap Peg	EL5315	524094	5949119	1147	EAGLE DYKE		PEG.	PEG.					PEG	OR17072934	0.15	7.28	76.8	40	86	1.18	0.06	0.23	0.23	0.3	1	55.7	5.1	0.51	14.6	0.06	0.2	0.021	4.97		271	0.01	211	0.11	2.41	48.5	0.9	1260	48.4	1160			0.16
MIRE	69036	Dorchap Peg	EL5315	524062	5949148	1163	EAGLE DYKE	5	PEG.	PEG.					PEG	OR17072934	0.02	5.05	21.3	10	71.3	0.25	0.01	0.13	0.1	0.4	1	37.4	1.7	0.39	13.3	0.1	0.9		1.68		3670		197	0.11	2.54	54.4	1.4	900	9.9	490			0.33
MIRE	69037	Dorchap Peg	EL5315	524075	5949153	1162	EAGLE DYKE		PEG.	PEG.					PEG	OR17072934	0.01	7.64	4.7	10	74.3	0.38	0.03	0.15	0.4	0.2	1	49.2	1.4	0.45	15.1	0.06	1.6		2.69		176.5		115	0.09	3.77	48.6	0.7	900	13.9	710			0.3
MIRE	69038	Dorchap Peg	EL5315	524006	5949174	1159	EAGLE DYKE		PEG.	PEG.					PEG	OR17072934	0.09	6.99	50.5	90	35.3	0.23	0.11	0.04	0.46	0.6	2	34.8	2.6	0.61	13.3	0.05	0.4		2.76		211	0.01	289	0.1	2.99	53.4	1.8	1390	23.2	560			0.18
MIRE	69039	Dorchap Peg	EL5315	524250	5949112	1122	EAGLE DYKE		PEG.	PEG.			Width of Outcrop ~6m. Pegmatite with more or less granitic textured Groundmass. Feox staining: Zonations of felsic "sugary" Textured Groundmass and secritic alteration	GRAB	PEG	AD19134696	0.03	7.86	7.4	20	8.92	0.1	0.02		0.37	0.2	2	49.3	2.7	0.33	14.85		0.9		2.64		347		83	0.42	3.3	40.8	2.4	1990	6.5	630			0.2
MIRE	69040	Dorchap Peg	EL5315	524275	5949107	1118	EAGLE DYKE		PEG.	PEG.			Same as site 608643	GRAB	PEG	AD19134696	0.03	7.14	7.5	30	61.4	0.22	0.05		0.33	0.2	3	27.3	2	0.24	18.9	0.05	2		1.71		116.5		82	0.34	5.19	72.7	1.6	1570	12.8	411			0.12
MIRE	69041	Dorchap Peg	EL5315	524265	5949114	1121	EAGLE DYKE		PEG.	PEG.			Similar to site 608644	GRAB	PEG	AD19134696	0.03	8.5	7.9	20	65.4	0.3	0.06		0.34	0.3	4	55.8	3.2	0.39	23.1	0.05	1.9	0.03	2.5		58.5	0.01	81	0.5	4.51	87.7	1.7	1290	16.5	710			0.12
SRE	69042	Dorchap Peg	EL006300	520274	5956785	459	SRE	5	PEG.	PEG.			Fine grained Peg/ Micro granite- adjacent fine tourm,qtz,Fspar,Mica. No Biotite. Needle tourmaline 2-5% (40m x m dyke Iisolated o/c) Sampled E- W	GRAB	PEG	OR18002104	0.1	7.39	44.5	10	1.61	0.7	0.19	0.09	3.01	0.5	2	20.9	2.7	1.04	13.65	0.16	0.8	0.016	2.99	1.7	11.4	0.04	308	0.2	3.38	7.9	1.9	1060	22.6	254			0.13
SRE	69043	Dorchap Peg	EL006300	520474	5956927	525	SD3	4	PEG.	PEG.			Fine to medium grained PEG- qtz/ Fspar/Mica+Minor tourmaline (BLK)	GRAB	PEG	OR18002104	0.1	7.14	15	10	2.53	0.65	0.17	0.22	2.08	0.5	4	10.85	3.7	1.16	16.05	0.17	1.2	0.016	2.35	0.9	15.9	0.03	1420	0.28	3.8	13.8	1.5	1170	20.5	240			0.1
SRE	69044	Dorchap Peg	EL006300	520463	5957044	554	SD3?	2	PEG.	PEG.			MED grained PEG/Granite-No biotite , granite texture-Fspar/QTZ=50:50 large 8mm rods of black tourmaline (One shows a core of Elbite? Or appatite-Apple green) very minor Mica.	GRAB	PEG	OR18002104	0.13	6.53	97.8	10	1.54	0.88	0.17	0.18	1.64	0.4	9	13.4	0.9	0.92	14.05	0.22	1		3.18	0.7	16.1	0.03	405	0.7	3.68	7.2	1.1	1250	23.6	306			0.06
SRE	69045	Dorchap Peg	EL006300	520464	5957252	666	SD3?	5	PEG.	PEG.			PEG-fine (Apilitic texture) equal parts QTZ/FSPAR/Mica -trace tourmaline -5-6m wide	GRAB	PEG	OR18002104	0.07	5.83	32.5	10	2.84	1.03	0.07	0.45	0.83	0.6	3	24.9	1.4	1.07	16.25	0.23	1.5	0.006	2.81		31.5	0.02	2370	0.21	3.69	15	1.2	1380	15.2	412			0.1
SRE	69046	Dorchap Peg	EL006300	520465	5957371	688		6	PEG.	PEG.			Med Peg coarse tourmaline (BLACK) Approx 6m wide Unkown strike	GRAB	PEG	OR18002104	0.04	7.35	44.1	20	4.71	0.25	0.16	0.19	3.27	3.4	4	24.3	5.6	1.15	21.4	0.2	0.9		2.21	3.1	84.8	0.04	805	0.34	3.24	32.3	2.1	750	15.9	412			0.13
SRE	69047	Dorchap Peg	EL006300	520469	5957409	670		10	PEG.	PEG.			Fine to Med Peg equal parts QTZ/Fspar/MICA - large >50mm fine black tourmaline	GRAB	PEG	OR18002104	0.06	6.2	47.5	20	2.01	0.96	0.12	0.18	3.23	1.3	3	12.1	2.5	0.98	15.6	0.18	1.5	0.008	2.96	2.5	16	0.03	688	0.21	3.34	13.2	2.3	880	18.7	291			0.08
MCRE	69048	Dorchap Peg	EL006486	523346	5948524	1171	EAGLE WEST	5	PEG.	PEG.			Aplitic to med grained Peg. Fspar-Mica-QTZ-(slight sericities/gresson on miccas) Minor Mn stains/coating. 40% fine mica. Sampled W - E (5m)	GRAB	PEG	OR18002104	0.04	6.69	47.2	10	3.47	0.59	0.33	2.11	0.77	0.3	2	34.8	1	0.57	22.2	0.25	1.6		3.47		27.3	0.01	1190	0.19	3.25	40.2	1	3280	14	910			0.1
MCRE	69049	Dorchap Peg	EL006486	523329	5948546	1175	EAGLE WEST	8	PEG.	PEG.			Aplitic Peg with veins/Clots of coarse QTZ/mica/Fspar. Predom fine sugar texture 50% Fspar, 40%Mica and mm QTZ Pherocrysts. Crossed by clots and joint fills of coarse Peg. Some area of intense Mn staining	GRAB	PEG	OR18002104	0.03	7.33	26.5	30	4.27	1.17	0.18	0.8	1.26	0.3	4	40.6	0.5	0.6	24.7	0.21	3.8		2.08	0.6	28.8	0.01	1000	0.32	4.15	50.2	1	2220	12.3	610			0.11
MCRE	69050	Dorchap Peg	EL006486	523295	5948570	1164	EAGLE WEST	6	PEG.	PEG.			PEG-Fine-Med grain, GPS=west Contact see sample description *tace ASP.? (P.gey sulphide ) on w-wall contact	CHIP	PEG	OR18002104	0.47	8.44	1825	60	5.22	5.73	0.37	0.87	1.45	0.8	2	55.9	1.7	0.94	26.7	0.17	1.4		3	0.8	38.4	0.03	1030	0.37	3.05	51.9	1.2	3240	16.7	780	0.005	0.02	0.35
MCRE	69051	Dorchap Peg	EL006486	523282	5948595	1155	EAGLE WEST	6	PEG.	PEG.			Peg-fine apltic Peg with minor coarse Peg Zones/Joint fills.	GRAB	PEG	OR18002104	0.04	7.97	163.5	20	4.85	1.19	0.3	0.37	1.02	0.5	3	42.1	1.2	0.78	24.8	0.21	1.8		1.89	0.5	35.4	0.01	755	0.26	3.99	51.4	1.4	2550	11	570			0.22
MIRE	69052	Dorchap Peg	EL5315	524066	5949152	1550	EAGLE DYKE	5	PEG.	PEG.			Med. Grained PED, no Tourmaline, aplitic texture - mod - Lt. weathered. Sampled W - E (5m).	CHIP	PEG	OR18015087	0.06	7.26	22.2	20	87.1	0.27	0.03	0.17	0.68	0.6	3	48.2	9.4	0.51	15.8	0.06	1.2		2.74		850	0.01	166	0.1	3.45	64.8	2.4	850	14.7	740		0.01	0.26
SRE	69053	Dorchap Peg	EL006300	517813	5964584	550	SD11	7	PEG	PEG			Variable Grain size granite peg- minor coarse zones, abundant coarse tourmaline majority granite textured. 80% Fspar 10-15% qtz- 2-5%- TOURM = 312DEGREE GRID STRIKE -V. STEEP DIP SAMPLE 7M TOWARDS 212 DEGREE GRID.	CHIP	PEG	OR18015087	0.05	7.29	12.5	20	1.01	0.91	0.14	0.06	6.16	0.6	7	10.15	4.5	0.73	15.9		0.9	0.007	3.16	3.4	14.7	0.06	330	0.33	2.25	10.3	2	760	24.3	233		0.01	0.09
SRE	69054	Dorchap Peg	EL006300	517816	5964567	548	SD11	7	PEG	PEG			GRANITE TEXT-FINE W MEDIUM AS ABOVE- MORE TOURMALINE X-STALS. 70% Fspar , 20%QTZ % TOURMALINE	CHIP	PEG	OR18015087	0.08	7.14	2.9	10	0.89	1.39	0.14	0.08	3.81	0.5	4	10	3.7	0.68	12.7		0.9	0.007	3.19	1.9	29.2	0.04	526	0.14	2.61	5.9	1.2	820	25.5	218		0.01	0.06
SRE	69055	Dorchap Peg	EL006300	517956	5964533	484	SD11	5	PEG	PEG			STEEP SDIP- 111DEGREE GRID STRIKE. GENERALLY FINE-MED GRAIN TEXTURED PEG	CHIP	PEG	OR18015087	0.05	7.34	4	10	0.97	0.68	0.12	0.14	2.68	0.4	5	8.51	7.2	0.73	15.9	0.05	1.1	0.012	3	1.2	11.6	0.04	829	0.21	3.05	13.5	1.2	870	18.7	271			0.29
SRE	69056	Dorchap Peg	EL006300	517648	5964711	607	SD11	3	PEG	PEG			SEE SAMPLE- PEG-FINE GRANITIC WITH FINE DISSEM TOURMALINE	CHIP	PEG	OR18015087	0.04	7.09	3.4	20	0.51	1.93	0.16	0.06	8.36	0.8	3	8.57	4.1	1.12	17.4	0.08	0.8	0.019	2.37	3.8	9.1	0.06	715	0.22	2.55	9.2	2.2	560	22.7	167.5			0.07
SRE	69057	Dorchap Peg	EL006300	517320	5964858	640	SD11?	8	PEG	PEG			PEG - granitic, aplitic in part, fine tourmaline, trace Mn stains.	CHIP	PEG	OR18015087	0.01	7.64	18.9	50	1.33	0.67	0.13	0.11	4.82	1	3	10.15	3.2	0.84	17.15	0.09	1.2	0.007	3.17	2.6	9.7	0.05	718	0.09	2.99	8.9	2.5	1010	17.5	254			0.12
MIRE	69058	Dorchap Peg	EL5315	524670	5948529	807	SD6	5	PEG	PEG			Fspar- MICA-Qtz-SOME ZONES OF STRONG qtz ABUNDANT Mn COATINGS , PREDOM. Aplitic ground mass, up tp 20% mica- some showing P.green greisen alteration western contact with seds, sharp contact @ 142 degree vert.	CHIP	PEG	OR18015087	0.01	7.68	4.2	30	4.35	0.39	0.12	0.13	1.82	0.4	4	31.8	4.2	0.79	23.9	0.12	4.4		1.72	0.8	146.5	0.02	1520	0.27	4	93.8	0.8	2770	17.9	470		0.01	0.07
MIRE	69059	Dorchap Peg	EL5315	524677	5948518	806	SD6	5	PEG	PEG			Medium-Fine ground mass Predom mica- Qtz- abundant Mn coating	CHIP	PEG	OR18015087	0.01	7.7	101	30	4.07	1.79	0.14	0.26	0.91	0.2	4	21.2	3.6	0.9	27	0.12	1.5		2.27		192.5	0.01	1270	0.18	3.4	55.7	0.8	3330	17.7	560		0.01	0.14
MIRE	69060	Dorchap Peg	EL5315	524681	5948515	863	SD6	1.5	PEG	PEG			medium grained- Fspar/ Mica/Qtz abundant Mn coating/stain poss pale pink (Weath) spodumen X-tal (10x5mm) two strong cleavages. Eastern contact- poss parallel or continuation 2m E- but poor outcrop-may be float?	CHIP	PEG	OR18015087	0.01	7.56	26.4	30	4.73	0.51	0.08	0.12	1.07	0.2	5	22.2	4.4	0.7	20.2	0.14	1.9		1.79	0.5	81.6	0.01	508	0.21	4.34	32.1	0.9	1830	15.4	421			0.15
MIRE	69061	Dorchap Peg	EL5315	524684	5948567	835	SD6	2	PEG	PEG			Massive PEG Block O/C . Granite/ equigranular med x-stals- Fspar/Mica/Qtz- minor Mn Films on Musc flakes. Some pockets of 20cm x 30cm fspar xstals, Mn predom. On partings & Mica.	CHIP	PEG	OR18015087	0.01	7.38	27.6	40	16.1	0.22	0.19	0.11	0.72	0.2	2	22.3	3.7	0.82	25.9	0.14	1.3		2.62		58.7	0.02	875	0.68	3.42	84.4	0.8	3410	25.2	610			0.13
MIRE	69062	Dorchap Peg	EL5315	524684	5948573	842	SD6	5	PEG	PEG			Fine grained- equigranular, predom Fspar Rich 0% Qtz in place, some Very rich Qtz Areas - Approx 80% Silica- mainly in core of Dyke *Poss central zoning Qtz Core.	CHIP	PEG	OR18015087	0.01	6.82	12.9	40	5.64	0.49	0.19	0.18	1.14	0.5	3	16.95	5.5	1	23.8	0.15	1		2.13	0.5	160.5	0.01	1230	0.15	3.82	67.4	1.6	3740	30.5	500		0.01	0.11
MIRE	69063	Dorchap Peg	EL5315	524671	5948572	840	SD6	5	PEG	PEG			Med. Grain Peg- more silica/ Qtz rich ~ 50% - some large Fspar zones, Groundmass 80% Fspar -Var. Mica	CHIP	PEG	OR18015087	0.01	7.48	9.4	20	18.4	0.28	0.22	0.16	0.82	0.2	3	17	5.6	0.76	24.1	0.14	2		1.39		69	0.01	827	0.23	3.93	83.2	0.6	3230	33.1	402			0.09
MIRE	69064	Dorchap Peg	EL5315	524668	5948568	839	SD6	5	PEG	PEG			Predom. Coaurse qtz/fspar megacrysts in a fspar gmass, pockets of more aplitic - Mn rich fine PEG (fspar dom). Zones of intense mica, no griesen alt. Large sub-horiz. Qtz Vns <70mm thick, large book mica (40 - 50mm x 5mm).	CHIP	PEG	OR18015087	0.01	7.32	7.9	30	6.53	0.38	0.18	0.11	1.84	0.3	3	23.4	2.1	0.74	23.8	0.13	1.9		1.93	0.8	227	0.01	881	0.17	4.12	74.7	0.9	4350	21.9	540		0.02	0.08
MIRE	69065	Dorchap Peg	EL5315	524668	5948571	851	SD6	2	PEG	PEG			As for 608668 -> W-Wall of dyke contact	CHIP	PEG	OR18015087	0.01	7.17	19.4	30	5.36	0.75	0.08	0.26	0.57	0.3	5	18.9	2.8	0.94	28.7	0.12	0.6		2.03		224	0.01	1000	0.21	2.88	83	1.2	3940	12.5	560			0.1
MIRE	69066	Dorchap Peg	EL5315	525380	5948940	949	SD5A	10	PEG	PEG			Eagle like aplitic peg- No Tourmaline, Predom Aphinitic Fspar Groundmass Minor Qtz Megacrysts , 10-15% Mica, often as Narrow zones 0mm Wide	CHIP	PEG	OR18015087	0.01	7.94	4.5	30	101.5	0.17	0.11	0.07	1.74	0.7	2	26.8	6.8	0.6	20.2	0.13	1.7		1.95	1.3	110.5	0.01	349	0.13	3.75	88.7	1.9	1690	17.1	500		0.01	0.12
MIRE	69067	Dorchap Peg	EL5315	525425	5948910	930	SD5A	15	PEG	PEG			Aplitic- Predom Fspar G-mass, Fine Mica Minor zones of coarse Fspar Crystals, Minor QTZ SE-NW Strike-steep Dip	CHIP	PEG	OR18015087	0.01	7.03	1.8	20	59.5	0.13	0.08	0.07	1.3	0.3	1	23.5	3.1	0.38	20.2	0.13	1.2		1.57	0.7	36.4	0.01	135	0.05	4.22	77	1.2	1190	13.7	440			0.08
MIRE	69068	Dorchap Peg	EL5315	525392	5948933	949	SD5A		PEG	PEG			Complex PEG - dark layered bands with wave like layering - wrigalitic texture - this style of material only in an isolated outcrop.	GRAB	PEG	OR18015087	0.02	7.82	3.1	10	72.8	0.4	0.14	0.14	1.52	0.2	4	22.5	2.8	0.51	28.7	0.12	2		1.34	0.8	141.5		667	0.27	4.36	80.4	0.6	1820	9.6	450
MIRE	69069	Dorchap Peg	EL5315	525439	5949066	925	SD5	8	PEG	PEG			Aplitic Fspar Groundmass, fine Dissem Mica- minor Qtz crystals- V. minor Coarse Mica- full width- Minor Fe staining Assoc. with mica clots.	CHIP	PEG	OR18015087	0.04	7.29	7	50	77.9	0.42	0.07	0.06	1.06	0.3	3	15.3	4.4	0.39	15.5	0.11	0.6		1.73	0.6	90.2	0.01	85	0.14	4.47	48.8	0.9	1280	14.5	326		0.01	0.29
MIRE	69070	Dorchap Peg	EL5315	525444	5949074	920	SD5	9	PEG	PEG			See Lith 608673 Total Width 17m+ 3m S/C =20m 17m 100% OC (3m float? - not sampled)	CHIP	PEG	OR18015087	0.04	7.3	2.1	40	133.5	0.72	0.07	0.09	0.8	0.5	4	18.85	5.7	0.54	19.3	0.13	0.8		2.13		125	0.01	165	0.15	3.46	69.8	1.1	1500	16.8	431		0.01	0.27
MIRE	69071	Dorchap Peg	EL5315	521822	5956508	562	SD1A	8	PEG	PEG				CHIP	PEG	OR18015087	0.04	7.19	35.9	20	4.54	1.05	0.06	0.27	1.47	0.4	2	23	5.5	0.85	19.1	0.13	0.8	0.007	3.07	0.6	45.2	0.02	892	0.17	2.94	32.9	1.3	1240	11.4	520			0.16
MIRE	69072	Dorchap Peg	EL5315	521801	5956546	554	SD1A	3	PEG	PEG			Peg-fine/apilitic Fspar, Mica massive, Minor Qtz, centre of the dyke medium Fspar and Mica Xstals, Coating/ Stains Mn Looks Good,	CHIP	PEG	OR18015087	0.02	7.52	3.3	130	5.77	0.77	0.06	0.23	3.4	0.6	3	19.6	2.7	0.74	22.2	0.13	1.7		2.05	1.6	17.9	0.03	672	0.09	4.12	64.5	2	1270	15.7	490			0.4
MIRE	69073	Dorchap Peg	EL5315	521663	5956679	577	SD1 AREA	4	PEG	PEG			Med -> Fine Peg, abundant fine Qtz x-Stals -Minor course 0mm mica books, microgranitic -> aplitic txture, shows 2-5% tourmaline (BLH) x-Stals.	CHIP	PEG	OR18015087	0.03	7.19	2.5		3.33	0.16	0.07	0.09	1.56	0.7	5	26.1	4.3	0.84	30.4	0.14	0.6	0.021	2.05	1.1	38.7	0.05	442	0.41	2.26	34.9	1.5	550	7.5	449			0.05
MIRE	69074	Dorchap Peg	EL5315	521509	5956653	516	SDI	5	PEG	PEG			Margins are aplitic, fine Fspar-Minor Qtz crystals, moves into core of more Qtz/Silica- viens/ zones of coarse mica (0mm)- Some Qtz viens	CHIP	PEG	OR18015087	0.03	7.83	18	40	21.8	1.3	0.05	0.37	2.12	0.6	4	17.6	1.9	0.75	19.65	0.14	1		2.75	1.2	54.7	0.03	1390	0.12	3.28	31.1	2.4	1100	17	412			0.08
MIRE	69075	Dorchap Peg	EL5315	521510	5956649	514	SDI	6.5	PEG	PEG			Med/Coarse Peg, Fspar/ Qtz Rich Minor Clots of Coarse Mica and Large Fspar/Qtz - Minor tournmaline and some Mn staining.	CHIP	PEG	OR18015087	0.04	7.28	44.8	20	14.6	0.98	0.06	0.33	2.58	0.3	4	21.5	3	0.89	17.15	0.14	0.6	0.007	2.95	1.1	49	0.03	1490	0.19	2.92	13.8	1.4	1150	15.3	412			0.12
MIRE	69076	Dorchap Peg	EL5315	521440	5956680	522	SD1	5	PEG	PEG			PEG - No Tourm.	CHIP	PEG	OR18015087	0.06	8.03	40	70	16.05	1.49	0.11	0.47	6.99	0.8	4	44.9	2.4	1	19.2	0.14	1.2		3.96	3.4	122.5	0.08	1380	0.15	2.69	26.8	2.2	1860	19.9	590			0.15
MIRE	69078	Omeo Metamorphics	EL5315	521444	5956683	519	SD1	11	SED	SED			Highly micaceous dark schistose siltstone wedge b/ween two dyke bars. No veining.	CHIP	SED	OR18015087	0.01	7.08	15.6	510	2.63	0.54	0.31	0.05	88.8	8.2	52	64.6	10.6	3.55	21.3	0.22	3.4	0.068	2.84	44	480	1.03	369	0.11	0.56	15.3	19.2	550	27.1	257
MIRE	69079	Dorchap Peg	EL5315	521452	5956690	522	SD1	5	PEG	PEG			PEG - No Tourm.	CHIP	PEG	OR18015087	0.06	7.43	44.1	20	6.55	2.95	0.12	0.31	1.95	0.3	4	25.7	1.4	0.78	20	0.17	0.5	0.038	2.13	0.9	98.9	0.05	845	0.32	3.43	24.4	0.7	1660	14	346			0.13
MCRE	69080	Dorchap Peg	EL006486	524498	5942809	1165	POWER LINE 1	10	PEG	PEG			PEG - (Previous XRD Spodumene identification) - Variable aplitic to medium crystaline, predom. F-spar/mica, ~20% qtz phenocrysts, no tourmalline. Fe stained mica bands. Strike 152 Grid, approx. 90 dip.	CHIP	PEG	OR18015087	0.07	7.36	23.2	130	3.67	5.25	0.22	0.21	3.43	1	4	24.1	14.3	1.06	24.3	0.13	0.8	0.044	2.76	1.8	64.9	0.03	1280	1.41	2.22	49.4	1.5	3560	50.3	570			0.08
MCRE	69081	Dorchap Peg	EL006486	524512	5942810	1170	POWER LINE 1	6.5	PEG	PEG			Med - Coarse PEG, large mica flakes, increased qtz. No Tourmaline. ~30% Qtz / 40% Mica / 20 - 30 % Fspar.	CHIP	PEG	OR18015087	0.03	6.9	7	40	3.18	0.82	0.23	0.11	2.11	0.7	6	11.7	8.5	0.88	20.6	0.13	0.6	0.025	2.04	1	18.2	0.02	801	0.25	2.88	37.2	2	2710	22.6	403		0.01
MCRE	69082	Dorchap Peg	EL006486	524487	5942841	1165	POWER LINE 1	5	PEG	PEG			Predom. Fine - aplitic PEG, abundant mica, minor clots of qtz (Solid up to 200mm), minor large (cm) fspar xstals,	CHIP	PEG	OR18015087	0.02	6.4	33.1	70	51.4	0.75	0.32	0.52	1.25	0.7	2	25.8	5.3	0.82	20.9	0.14	1.2	0.007	2.2	0.6	97.7	0.07	796	0.1	2.57	43.8	1.4	3740	22.7	550
MCRE	69083	Dorchap Peg	EL006486	524477	5942839	1166	POWER LINE 1	5	PEG	PEG			Medium PEG, more mica, large fspar clots up to 0.3m, gmass fspar dominated, minor Mn stains - aplitic margins (chilled)	CHIP	PEG	OR18015087	0.02	7.52	32	30	3.89	2.57	0.16	0.42	1.55	0.5	2	24.6	8.3	0.71	21.5	0.13	0.6	0.009	3.52	0.8	29.2	0.02	313	0.12	2.63	45.5	1.4	2400	22.7	840			0.07
MCRE	69084	Dorchap Peg	EL006486	524440	5942883	1137	POWER LINE 1	5	PEG	PEG			Predom fspar gmass, zones of coarse mica, overall med. Crystaline. No Tourm.	CHIP	PEG	OR18015087	0.04	6.95	9.7	40	2.97	1.56	0.18	0.1	0.65	0.1	3	12	7.5	0.75	23.6	0.13	0.4	0.058	1.85		19	0.03	235	0.42	2.68	37.2	0.6	1750	16.3	403			0.08
MCRE	69085	Dorchap Peg	EL006486	524438	5942879	1136	POWER LINE 1	5	PEG	PEG			PEG - fine aplitic to medium, musc. Rich, abundant Fe on Mica, some late Qtz veining < 20mm.	CHIP	PEG	OR18015087	0.07	7	5.3	30	2.73	9.08	0.39	0.05	1.42	0.2	4	15.1	14.5	0.88	22	0.13	0.6	0.021	1.63	0.7	14.8	0.03	353	0.41	2.97	42	1.2	2860	13.1	364		0.01	0.12
MCRE	69086	Dorchap Peg	EL006486	524435	5942874	1139	POWER LINE 1	6	PEG	PEG			PEG - fine fspar gmass, abundant fine qtz phenocrysts, aplitic towards contact - Random large (<0.2m) qtz/book mice inclusions.	CHIP	PEG	OR18015087	0.05	6.15	3.7	30	3.81	0.76	0.1	0.04	0.7	0.2	6	15.45	8.9	0.77	19.65	0.1	0.7	0.02	2.12		15.7	0.02	147	0.3	2.3	51.3	1.5	1390	13	470			0.09
MCRE	69087	Dorchap Peg	EL006486	524377	5942907	1107	POWER LINE 1	5	PEG	PEG			PEG - Aplitic contact, common large (0cm) qtz Xstals and large fspar clots, consistant aphanitic gmass, small zones of strong Mn.	CHIP	PEG	OR18015087	0.04	7.15	101.5	30	14.65	1.59	0.26	2.02	0.86	0.3	1	12.85	6.6	0.85	22.8		2.9	0.023	1.7		54.9	0.01	989	0.11	3.3	53.2	1.5	3190	23.6	490		0.01	0.07
MCRE	69088	Dorchap Peg	EL006486	524375	5942903	1106	POWER LINE 1	5	PEG	PEG			PEG - 50% Qtz, 40% Fspar + mica, fine gmass. Significantly Qtz Ricj (Zoning?)	CHIP	PEG	OR18015087	0.03	6.67	28.5	30	3.17	0.95	0.15	0.17	0.68	0.3	1	12.9	9	0.87	22.2	0.07	0.8	0.01	2.25		46.8	0.02	339	0.12	2.87	43.4	1.2	2070	26.5	490			0.09
MCRE	69089	Dorchap Peg	EL006486	524340	5942914	1085	POWER LINE 1	5	PEG	PEG			PEG - med - fine texture, less qtz clots that @ 608692 ~20% coarse qtz clots, abudant fspar laths, Fe stains, some Mn stains in aplitic gmass.	CHIP	PEG	OR18015087	0.05	7.78	5.6	140	16.5	4.46	0.18	0.19	12.7	0.3	12	21.6	3.5	0.93	24.9	0.08	1.2	0.011	2.42	6.4	124.5	0.16	357	0.29	2.93	52.8	1.3	2500	23.7	520		0.01	0.09
MCRE	69090	Dorchap Peg	EL006486	524340	5942918	1089	POWER LINE 1	2	PEG	PEG			PEG as at 608693 - E-Wall at sample end.	CHIP	PEG	OR18015087	0.03	7.62	4.9	30	8.31	1.43	0.25	0.12	1.33	0.4	3	10.8	10.2	0.7	22.4	0.09	1.4		1.41	0.6	32.7	0.02	290	0.14	4.28	94	1.2	2250	12.9	386			0.12
MCRE	69091	Dorchap Peg	EL006486	524347	5942690	1175	POWER LINE 2	5	PEG	PEG			PEG - Coarse blocks of Fspar / qtz up to 0.2m (angular) - Fspar rich gmass, minor qtz phenocrysts < 5mm, mica predom as coarse books < 30mm. Minor Mn stains. No tourmaline.	CHIP	PEG	OR18015087	0.09	7.53	26.3	30	4.98	1.09	0.09	0.84	1.94	2.8	5	13.95	4.6	1.21	21.4	0.09	0.6	0.014	2.49	1.5	620	0.04	1720	0.19	2.33	31.9	2.8	2310	13.5	520			0.07
MCRE	69092	Dorchap Peg	EL006486	524344	5942685	1179	POWER LINE 2	5	PEG	PEG			PEG - Generally coarse, abundant blocky fspar and large qtz angular blocks, g-mass med Xstaline. Mn surface coats common, minor large book mica < 60mm, ~30% total qtz as megacrysts. No tourmaline.	CHIP	PEG	OR18015087	0.03	7.34	25.3	30	3.49	0.51	0.11	1.21	1.08	0.5	2	21.7	3.5	0.88	22.3	0.05	1		2.98	0.5	114	0.01	940	0.15	2.9	39.4	2	2990	16	630			0.12
MCRE	69093	Dorchap Peg	EL006486	524346	5942645	1210	POWER LINE 2	5	PEG	PEG			Fine - Med. Granitic textured fspar gmass and qtz phenocrysts, abundant dissem. Fine mica - minor // contacts SED inclusions at dyke margin - rare coarse (0mm) qtz/fspar blocks - v. large (300 x 50mm) Fspar xstals. No tourmaline.	CHIP	PEG	OR18015087	0.06	7.97	24	30	4.3	1.25	0.11	0.22	1.32	0.5	2	18.4	8.7	0.97	26.5	0.06	0.9	0.005	2.35	0.6	34.8	0.02	789	0.16	3.21	47.2	2.3	2430	30.7	500			0.12
MCRE	69094	Dorchap Peg	EL006486	524351	5942643	1208	POWER LINE 2	5	PEG	PEG			Med. Granitic texture, Fspar gmass, abundant fine dissem. Mica, minor Fe stains on weathered surfaces assoc. with mica (as in 608697).	CHIP	PEG	OR18015087	0.05	7.33	17.9	20	3.7	1.96	0.07	0.24	1.63	0.3	3	13.55	9.4	0.62	23.2	0.05	0.7	0.017	1.97	0.7	30.8	0.02	677	0.28	3.56	36.6	2	1600	35.9	395			0.07
MCRE	69095	Dorchap Peg	EL006486	524363	5942595	1216	POWER LINE 2	2	PEG	PEG			Sharpe SED / PEG contact - very steep - PEG lens out at Sth End of dyke - sharpe SED contacts on E and W sides, 2m wide, granitic textured, minor qtz/Fspar clots.	CHIP	PEG	OR18015087	0.02	8.19	9.6	50	4.71	1.2	0.09	0.11	1.02	0.3	4	16.6	5.1	0.8	29	0.06	0.8	0.025	2.12		40.1	0.04	600	0.15	2.6	60	1.4	1200	33.4	356			0.06
MCRE	69096	Dorchap Peg	EL006486	524358	5942610	1217	POWER LINE 2	4	PEG	PEG			Med Xstaline, granitic textured, fspar gmass dom.	CHIP	PEG	OR18015087	0.05	8.04	7.8	30	4.49	1.09	0.2	0.15	1.52	0.2	5	18.2	4	0.64	24	0.06	1.1		3.13	0.7	31.7	0.02	730	0.17	3.5	40.9	1.7	2420	25.8	560			0.08
MCRE	69097	Dorchap Peg	EL006486	524309	5942801	1127	POWER LINE 2	7	PEG	PEG			Med Xstaline granitic textured, abundant mica throughout, Fe/Mn stained, 5 -8mm common qtz phenocrysts. V. minor coarse (<40mm) Fspar laths / blocks. No tourmaline.	CHIP	PEG	OR18015087	0.02	7.59	11.6	20	19.9	1.01	0.09	1.41	1.07	0.3	3	24.6	3.2	0.68	27.9	0.07	1.4		2.41	0.5	98	0.01	1230	0.13	3.51	71.7	1	2530	20.6	650			0.11
MCRE	69098	Dorchap Peg	EL006486	524324	5942763	1155	POWER LINE 2	3	PEG	PEG			Med granitic PEG, large Fspar clots, disseminated mica, minor qtz phenocrysts, minor Mn stains. Diffuse W contact (prob not full extent of dyke) - lens out?	CHIP	PEG	OR18015087	0.02	7.52	27.8	20	4.17	0.65	0.19	0.23	1.15	0.3	4	13.15	2.4	0.88	23.3	0.06	0.8		2.05	0.6	32.4	0.02	1050	0.28	3.37	39.2	0.6	3520	16	460			0.06
MIRE	69099	Dorchap Peg	EL5315	527138	5955076	798	SD8	4	PEG	PEG			OUTCROP LIMITED TO 'BLOB' OF PEGMATITE ALONG RIDGELINE. 60% PLAGIOCLASE, MED MUSCOVITE FLAKES, 40% MED QTZ (CRYSTALS). NO TOURMALINE. 4m WIDE PEG AT SITE.	CHIP	PEG	OR18025458	0.01	6.14	4.1	20	34.8	0.09	0.05	0.09	1.65	0.5	4	43.8	1.4	0.46	21.4	0.07	2.7		1.66	0.7	71.5	0.01	189	0.3	4	92.8	1.5	1030	15.9	550		0.01	0.11
MIRE	69100	Dorchap Peg	EL5315	527130	5955084	784	SD8	3.2	PEG	PEG			SANDSTONE RICH PART OF PEGMATITE. 30% PLAGIOCLASE GROUNDMASS WITHIN OXIDISED SANDSTONE HOST ROCK. OUTCROP 3.2m WIDE HERE. BOULDERY OUTCROP	CHIP	PEG	OR18025458	0.02	7.61	6.3	40	4.99	0.13	0.07	0.09	3.32	0.9	5	40.4	1.6	0.62	20.1		2.7		1.36	1.8	121	0.03	225	0.26	4.3	90.8	2.1	1230	13.6	480		0.01	0.12
MIRE	69101	Dorchap Peg	EL5315	527612	5954914	619	SD7	2	PEG	PEG			BLOB'OF PEG OUTCROPPING SUB-PARALLEL TO DRAINAGE LINE. OUTCROP 2 TO 3m WIDE. 60% FELDSPAR/30% MED CRYSTALLINE QTZ, MED MUSCOVITE, MINOR Mn STAINING	CHIP	PEG	OR18025458	0.01	7.76	6.3	50	12.9	0.29	0.33	0.18	1.63	0.4	4	56.8	1.8	0.55	23.6		1.9		2.58	0.7	39.8	0.02	612	0.26	3.61	84.7	0.9	2730	13.1	800		0.01	0.2
MIRE	69102	Dorchap Peg	EL5315	527252	5955072	752	SD7	5	PEG	PEG			LARGE WIDE PEGMATITE 'BLOB' STICKING OUT OF RIDGE. PEG INTERPRETED TO PINCH AND SWELL ALONG STRIKE. MED CRYSTALLINE PLAGIOCLASE GROUNDMASS (70%), MED-COARSE MUSCOVITE DISSEMINATED FLAKES, <30% QTZ, Mn STAINING ON FRACTURES	CHIP	PEG	OR18025458	0.02	8.74	29.8	40	3.65	0.42	0.14	0.18	0.58	0.3	1	130	1	0.36	20.8		0.7		5.56		52.6	0.01	342	0.1	2.67	38.4	0.9	2020	20.3	1920		0.01	0.19
MIRE	69103	Dorchap Peg	EL5315	527216	5955094	760	SD7	5	PEG	PEG			LARGE OUTCROP POSSIBLY ALONG STRIKE FROM 608706. QTZ RICH PEG (70% QTZ, 25% FELDSPAR), FINE-MED CRYSTALLINE MICA WITHIN QTZ FRACTURES. FEOX ALT ALONG FRACTURES IN QTZ	CHIP	PEG	OR18025458	0.02	5.75	2.2	30	16.65	0.35	0.07	0.09	0.99	0.6	2	60.4	2.7	0.63	12.55		0.5		2.13	0.5	53.5	0.01	228	0.13	2.45	30.2	2	1350	12.9	730		0.01	0.22
MIRE	69104	Dorchap Peg	EL5315	527205	5955104	765	SD7	5	PEG	PEG			FINE FELDSPATHIC GROUNDMASS WITH MINOR VERY FINE FEOX SPOTS AND MED GRAINED QTZ STRINGERS. FINE MICA.	CHIP	PEG	OR18025458	0.01	7.87	3.9	40	3.56	0.41	0.03	0.12	1.03	0.6	3	83.5	0.7	0.41	17.9	0.05	1		3.34	0.7	59.6	0.01	141	0.23	3.15	40.4	1.7	890	16.8	1050		0.01	0.18
SRE	69105	Dorchap Peg	EL006300	520957	5957551	772		3	PEG	PEG			BOULDER FIELD OF PEG EXPOSED ON NW SIDE OF SLOPE. 60% PLAG FINE-MED GROUNDMASS. VERY RARE TOURMALINE.	CHIP	PEG	OR18025458	0.05	7.06	16.9	20	2.72	4.31	0.05	0.13	3.23	1.3	3	23.9	3.5	0.73	15.5	0.05	1.2	0.009	3.04	2	35.6	0.02	908	0.27	2.72	18.8	1.3	1080	13.7	570		0.01	0.09
SRE	69106	Dorchap Peg	EL006300	520940	5957989	620	SD2	10	PEG	PEG			VERY LARGE PEG AS SEEN ON WHITELAWS B37 MAP. FINE GRAINED 55%PLAGIO/50% QTZ. EVEN TEXTURED GROUNDMASS. FINE TOURMALINE CRYSTALS THROUGHOUT GROUNDMASS	CHIP	PEG	OR18025458	0.03	5.94	52.6	10	2.34	0.46	0.06	0.21	1.54	0.4	4	16.3	2.3	0.62	14.7	0.08	1.1		2.87	0.8	17.8	0.03	952	0.27	2.82	11.6	2.8	1220	11.3	333		0.01	0.06
SRE	69107	Dorchap Peg	EL006300	520948	5957988	621	SD2	10.6	PEG	PEG			SAME ROCKTYPE AS 608711. SOME PARTS OF THIS INTERVAL INCLUDE PART OF THE SOLID QTZ CORE OF PEGMATITE WITH TOURMALINE	CHIP	PEG	OR18025458	0.03	7.16	65.3	20	1.92	0.61	0.06	0.17	2.66	0.8	3	16.95	2.4	0.84	14.7	0.06	1.3		2.98	1.7	18.8	0.03	925	0.22	2.82	11.4	4.8	1260	11.7	353		0.01	0.09
SRE	69108	Dorchap Peg	EL006300	520894	5958027	616	SD2	5.1	PEG	PEG			NEAR END OF PEG OUTCROP. PARTLY OBSCURED BY SOIL CREEP. PARTLY APHANITIC TEXTURE 50/50 FELDSPAR/QTZ. RARE/SPARSE FINE TOURMALINE. PATCHY FEOX ALTERATION HALOES IN GROUNDMASS	CHIP	PEG	OR18025458	0.05	6.69	51.1	10	3.23	0.62	0.08	0.18	1.91	0.3	2	15.45	3.1	0.76	16.25	0.06	1.2	0.014	2.7	1	23.5	0.02	1360	0.11	3.22	25.8	0.9	1350	16.2	373			0.11
MCRE	69109	Dorchap Peg	EL006486	526795	5944884	918	POWERLINE 3	3	PEG	PEG			60%FSPAR, 30% QTZ, COARSE (5mm) SILVERY MICA. NO TOURMALINE.	CHIP	PEG	OR18025458	0.04	7.82	14.9	30	4.32	0.52	0.04	0.15	1.96	0.7	4	25.7	2.3	0.44	20.6		1.6		2.4	1	43	0.02	311	0.22	3.33	72.3	1.7	1370	13.8	680		0.01	0.06
MCRE	69110	Dorchap Peg	EL006486	526031	5944492	1158	POWERLINE 3	3.3	PEG	PEG			60% QTZ, 40% FSPAR -DISSEM. 4mm MICA - SIMILAR TO 608713. NO TOURMALINE.	CHIP	PEG	OR18025458	0.01	6.15	5.1	30	52.7	0.31	0.1	0.14	0.64	0.3	2	80.5	2.2	0.34	23.6	0.07	1.3		2.08		87.8	0.03	125	0.12	2.49	75.8	1.6	960	10.9	930			0.07
MCRE	69112	Dorchap Peg	EL006486	525918	5944649	1122	POWERLINE 3	5.1	PEG	PEG			50% QTZ - MASSIVE QTZ RICH ZONE, EDGE OF O/C SHOWS PEGMATITE TEXTURE - KAOLINE / FELDSPAR. SOME >5mm COARSE MICA. NO TOURMALINE.	CHIP	PEG	OR18025458	0.01	2.05	1.9	10	24.3	0.05	0.02	0.07	0.32	0.3	6	23.4	0.8	0.59	6.67		0.3		0.55		29.7		153	0.49	0.56	16.6	1	230	3	281			0.09
MCRE	69113	Dorchap Peg	EL006486	525912	5944648	1126	POWERLINE 3	5.5	PEG	PEG			50% QTZ - MASSIVE QTZ RICH ZONE, EDGE OF O/C SHOWS PEGMATITE TEXTURE - KAOLINE / FELDSPAR. SOME >5mm COARSE MICA. NO TOURMALINE.	CHIP	PEG	OR18025458	0.02	3.57	2.4	20	72.9	0.07	0.03	0.07	0.61	0.4	4	46.1	1.7	0.61	12.6		0.6		0.81		45.8	0.01	152	0.29	1.21	52.9	1.6	470	6.1	520		0.01	0.14
MCRE	69114	Dorchap Peg	EL006486	525874	5944690	1097	POWERLINE 3	5.1	PEG	PEG			MORE MICA (MARGIN ZONE) OF PEG, FELDSPATHIC GMASS WITH 5-10mm MICA FLAKES. NO TOURMALINE	CHIP	PEG	OR18025458	0.02	6.27	2.8	50	8.68	0.36	0.08	0.22	0.68	0.4	1	81.5	2.2	0.27	29.1	0.17	2.7		1.95		15.5	0.03	112		5.95	137.5	1.5	930	18.4	810		0.01	0.14
MCRE	69115	Dorchap Peg	EL006486	525956	5944632	1140	POWERLINE 3	7.4	PEG	PEG			MORE MICA (MARGIN ZONE) OF PEG, FELDSPATHIC GMASS WITH 5-10mm MICA FLAKES. NO TOURMALINE	CHIP	PEG	OR18025458	0.01	4.79	2.1	10	142	0.11	0.06	0.11	0.53	0.4	5	62	0.6	0.52	12.9	0.06	0.4		1.46		22.9	0.01	129	0.35	1.72	44.1	1.5	750	10	650		0.01	0.2
MCRE	69116	Dorchap Peg	EL006486	525948	5944625	1142	POWERLINE 3	9	PEG	PEG			QTZ RICH PEG, DISSEM 3mm MICA, KAOLIN / FSAP.	CHIP	PEG	OR18025458	0.03	4.39	4.9	30	33.7	6.86	0.02	0.15	1.83	0.4	4	49	2	0.61	14.85	0.06	0.4		1.93	0.9	29.9	0.02	145	0.21	0.34	55.1	1.2	270	7.5	620			0.59
SRE	69117	Dorchap Peg	EL006300	520679	5957905	626	SD2B	7	PEG	PEG			60% fspar, 35% qtzas 2mm equigranular xstals, 2-5mm tourmaline throughout groundmass, patchy FeOx (After biotite?).	CHIP	PEG	OR18025458	0.06	7.16	18.5	50	2.13	0.79	0.1	0.15	5.04	13.7	4	22.8	1.1	0.52	14.7	0.09	1.3	0.006	2.91	2	17.6	0.03	810	0.12	2.79	7.4	3.9	890	17.2	316		0.01	0.07
SRE	69118	Dorchap Peg	EL006300	520686	5957901	633	SD2B	3.3	PEG	PEG			SIMILAR GRANITIC TEXTURE TO 608721, GROUNDMASS OXIDISED BY 3mm HALOS (AFTER TOURMALINE?), 3mm MICA FLAKES DISSEM. IN GMAS.	CHIP	PEG	OR18025458	0.06	7.81	9.6	70	2.47	0.61	0.22	0.11	9.13	37.4	3	21	1.9	0.63	16.2	0.1	1.1	0.02	3.01	2.6	25.6	0.05	1010	0.09	2.88	13.8	7.6	860	18.9	324		0.01	0.14
SRE	69119	Dorchap Peg	EL006300	521217	5956068	457		5	GRN	GRN			GRANITE SUBCROP, SIMILAR GRANITIC TEXT THROUGHOUT. DISSEM 1mm TOURMALINE IN GMASS, MINOR QTZ	CHIP	GRN	OR18025458	0.02	6.01	24.9	10	3.88	0.76	0.07	0.11	3.12	0.9	3	54	2.5	0.98	17.75	0.11	1.5		2.71	1.9	23.7	0.03	790	0.12	2.97	10.5	2.5	940	13.3	395		0.01	0.22
MIRE	69120	Dorchap Peg	EL5315	521184	5956191	465		15	PEG	PEG			LARGE SUB-CROPPING BOULDERS, PEG / GRN - POSS ZONATION (STH END MORE PEG TEXTURE, COARSE MICA, MINOR TOURMALINE - NTH END IS GRANITIC, FINE EQUIGRANULAR WITH FSAPR GMASS, PATCHY OXIDISED GARNET UP TO 2mm.	CHIP	PEG	OR18025458	0.09	6.12	41.1		4.01	1.96	0.06	0.36	1.51	0.3	4	34.4	1.6	0.87	19.65	0.09	1.5		2.25	0.6	96.5	0.02	2170	0.27	3.71	19.4	0.7	1190	9.2	357			0.28
SRE	69121	Dorchap Peg	EL006300	521052	5956138	433		8.3	GRN	GRN			GRANITIC TEXTURED, FSPAR 60%, QTZ 40%. GMASS EQUIGRANULAR TEXTURE, DISSEM. TOURMALINE 2mm LATHS	CHIP	GRN	OR18025458	0.07	5.74	44.6		2	0.76	0.08	0.23	1.42	0.3	4	17.3	2	0.82	16.15	0.09	0.9	0.015	2.66	0.6	26.6	0.02	800	0.27	3.17	13	0.9	1330	12.7	351			0.09
MIRE	69122	Dorchap Peg	EL5315	523099	5953083	701	GOSPORT GROUP	4.2	PEG	PEG			FELDSPATHIC PEG, FEOX HALOW WIHTIN GMASS - Mn? SnO2? PLATY TEXTURED SILICIOUS FELDSPAR? - SPODUMENT?	CHIP	PEG	OR18025458	0.04	6.22	5	30	72.1	0.39	0.05	0.19	0.52	1.3	5	62.4	0.3	0.54	19	0.1	1.4		2.86		1210	0.01	281	0.31	3.38	63.6	1	960	11.1	880			0.1
MIRE	69123	Dorchap Peg	EL5315	523712	5953064	708	GOSPORT GROUP	3	PEG	PEG			FELSIC - SILICIOUS GMASS. FSPAR FINE XSTALINE / PLATY. MUSCOVITE RAE IN FLAKES, LAOLINISED INPLACES. BROWN / BLACK VUGGY MIN IN PATCHES - SnO2?	CHIP	PEG	OR18025458	0.02	6.76	50.2	50	88.5	1.46	0.03	0.15	2.27	0.6	4	73	1	0.95	20.8	0.12	1.1		2.41	1.1	3510	0.03	196	0.15	2.41	90.5	1.6	2120	14.9	740		0.01	0.13
MIRE	69124	Dorchap Peg	EL5315	523733	5953069	690	GOSPORT GROUP	2	PEG	PEG			FELSIC - SILICIOUS GMASS. FSPAR FINE XSTALINE / PLATY. MUSCOVITE RAE IN FLAKES, LAOLINISED INPLACES. BROWN / BLACK VUGGY MIN IN PATCHES - SnO2?	CHIP	PEG	OR18025458	0.02	8.08	27.2	40	70.8	0.56	0.05	0.15	1.33	0.6	3	58.4	2.4	0.67	27.6	0.09	1.2		2.04	0.8	53.1	0.01	174	0.1	4.2	92.1	2.5	1180	18.2	610		0.01	0.08
MIRE	69125	Dorchap Peg	EL5315	523783	5953015	708	GOSPORT GROUP	3	PEG	PEG			FINE GRANULAR FSPAR / QTZ ~ 50:50 AS GMASS. MICA FLAKES DISSEM - 5 - 8mm. PATCHY FeOx HALOS AFTER SULPHIDE?	CHIP	PEG	OR18025458	0.04	7.92	57.3	70	9.69	3.84	0.03	0.2	10.15	0.7	8	29.1	2.8	0.57	25.6	0.13	1.9		1.9	16.6	56.2	0.05	265	0.25	3.72	90.3	2.5	1180	16.1	500		0.01	0.11
MIRE	69126	Dorchap Peg	EL5315	523857	5952821	673	GOSPORT GROUP		PEG	PEG			PEG FLOAT - POSS OFFSET FROM PEG AT 608731. PLAG RICH GMASS. Mn STAINING ON FRACS - SAME AS 69127 SAMPLE	CHIP	PEG	OR18025458	0.05	7.01	24	10	25	0.37	0.04	0.19	0.52	0.3	4	75.6	2	0.61	22.1	0.09	2.4		2.49		940		173	0.23	3.97	81.6	0.9	1450	27.6	980		0.01	0.08
MIRE	69127	Dorchap Peg	EL5315	523856	5952818	670	GOSPORT GROUP	2.8	PEG	PEG			QTZ-FELSIC RICH PEG, BROWN SnO2, RARE ASP?, STRIKE APPROX 137 GRID	CHIP	PEG	OR18025458	0.03	6.81	25	10	22.6	0.39	0.05	0.13	0.62	0.2	3	55.9	1.2	0.41	21.8	0.1	1.7		2.52		397		137	0.23	3.67	78.4	0.8	1410	8.4	930		0.01	0.07
MIRE	69128	Dorchap Peg	EL5315	523827	5952605	700	GOSPORT #3	5	PEG	PEG			FINE FELSIC - SILICIOUS GMASS, APLITIC PEG, RED/BROWN SPOTS - POSS LITHOPHILLITE	CHIP	PEG	OR18025458	0.02	7.59	2.6	10	8.08	0.29	0.02	0.07	0.88	0.5	2	60.1	0.8	0.33	25.5	0.09	4.7		2.19	0.7	710		117	0.09	3.73	68.8	1.3	610	9.6	940		0.01	0.12
MIRE	69129	Dorchap Peg	EL5315	523827	5952605	700	GOSPORT #3	4.8	PEG	PEG			FINE FELSIC - SILICIOUS GMASS, APLITIC PEG, RED/BROWN SPOTS - POSS LITHOPHILLITE	CHIP	PEG	OR18025458	0.01	7.88	4.5	10	5.08	0.38	0.02	0.08	0.78	0.7	3	41.7	1.5	0.79	17.05	0.09	0.6		1.83	0.6	4460	0.01	317	0.09	2.52	60.8	2	660	5.8	710		0.01	0.19
MIRE	69130	Dorchap Peg	EL5315	523895	5952818	688	GOSPORT	4.8	PEG	PEG			FELSIC SILICA GROUNDMASS, FINE AND SUGAR TEXTURE. FINE MUSCOVITE mm. APALITIC. DISTINCT BROWN PATCHY MINERAL FORMING FINE AGGREGATES (LiMnPO4?) SEE HANDSPECIMEN	CHIP	PEG	OR18025458	0.02	6.43	20.6	40	38	0.15	0.04	0.23	0.71	0.5	4	51.1		0.42	19.85	0.08	2.9		2.08		122.5	0.01	254	0.21	3.69	73.7	1	1480	20.7	530			0.08
MIRE	69131	Dorchap Peg	EL5315	524644	5950390	980	FERGUSSONS	4.5	PEG	PEG			Plagioclase rich, med-coarse grained groundmass, disseminated sericitic muscovite, Rare SnO2. Partly Greissenised	CHIP	PEG	OR18025458	0.03	8.33	4.6	10	40.5	0.3	0.08	0.13	0.38	0.6	3	65	0.5	0.44	18.55	0.09	0.9		5.34		680	0.01	376	0.16	2.77	76.8	2	1850	32.5	1520		0.01	0.1
MIRE	69132	Dorchap Peg	EL5315	524648	5950393	980	FERGUSSONS	3.7	PEG	PEG			Muscovite rich, standard plagioclase-qtz PEG. FeOx	CHIP	PEG	OR18025458	0.04	8.26	2.4	20	156.5	0.19	0.06	0.11	0.56	0.4	3	58.4	0.2	0.36	19.55	0.1	0.6		4.14		380	0.01	336	0.11	2.77	45.2	1.2	1320	26.4	1080		0.01	0.07
MIRE	69133	Dorchap Peg	EL5315	524611	5950421	994	FERGUSSONS	5.6	PEG_SN	PEG_SN			SnO2 seen in numerous chips as fine aggregates. Brownish tin bandings or Mn stainings. Feldspar partly Kaolinised, Sericitic alteration. Greissen. Handspecimen possibly shows tabular-striated crystals of Spodumene	CHIP	PEG	OR18025458	0.03	6.51	11.9	20	42.9	0.38	0.05	0.18	1.22	1.2	2	40.1	0.9	0.47	19.85	0.08	1.4		2.01	0.7	2440	0.01	555	0.2	3.18	72.8	2.5	880	14.1	600		0.01	0.11
MIRE	69134	Dorchap Peg	EL5315	524569	5950432	978	FERGUSSONS	3.7	PEG	PEG			Greissenised Plagioclase. Fine granular sugary textured groundmass. Fine spotty Sno2?. Shimmering muscovite.	CHIP	PEG	OR18025458	0.03	6.7	13.9	10	13.05	0.29	0.06	0.18	0.88	0.9	2	32.1	1.1	1.02	19.7	0.1	0.8		2.09		880	0.01	1650	0.14	3.52	81.8	2	2110	11.4	520		0.01	0.15
MCRE	69135	Dorchap Peg	EL006486	526070	5945392	1030	TRAPPERS GAP	6.5	PEG	PEG			Equigranular 'classic' PEG mineralogy, oxidised, plagioclase, 4mm muscovite flakes. Looks granitic in composition	CHIP	PEG	OR18025458	0.01	7.71	22.2	20	3.57	0.59	0.04	0.45	1.15	0.9	4	30.7	3.4	0.88	24.9	0.1	0.6		3.24	0.6	33	0.01	1390	0.82	2.14	56.9	2	1420	13.3	800		0.01	0.08
MCRE	69136	Dorchap Peg	EL006486	526063	5945392	1030	TRAPPERS GAP	7.9	PEG	PEG			Equigranular 'classic' PEG mineralogy, oxidised, plagioclase, 4mm muscovite flakes. Looks granitic in composition	CHIP	PEG	OR18025458	0.02	8.32	9.3	10	3.98	0.62	0.05	0.42	1.27	1.1	4	28.4	1.6	0.98	25	0.11	0.9		2.94	0.7	36.5	0.01	879	0.51	3.16	51.7	2.1	1830	12.1	720		0.01	0.08
MCRE	69137	Dorchap Peg	EL006486	526055	5945390	1030	TRAPPERS GAP	8.2	PEG	PEG			Equigranular 'classic' PEG mineralogy, oxidised, plagioclase, 4mm muscovite flakes. Looks granitic in composition	CHIP	PEG	OR18025458	0.02	7.93	3.6	10	4.45	1.51	0.04	0.35	0.74	0.4	3	34.5	0.8	0.67	25.3	0.11	0.9		2.84		61.4	0.01	602	0.27	2.97	70.8	0.9	1990	9	820			0.06
MCRE	69138	Dorchap Peg	EL006486	526047	5945388	1030	TRAPPERS GAP	9	PEG	PEG			Granitic texture. Tourmaline? Or Cassiterite?, Crystals poorly formed.	CHIP	PEG	OR18025458	0.02	7.29	8.7	20	4.43	0.29	0.03	1.09	1.22	0.6	2	27.1	2.2	0.66	24.3	0.11	1.7		1.9	0.7	105	0.01	1220	0.15	3.29	60.6	1.6	2090	10	560		0.01	0.17
MCRE	69139	Dorchap Peg	EL006486	526062	5945430	1020	TRAPPERS GAP	4.9	PEG	PEG			Exposure of PEG in bend of road cut. Centre and West side of outcrop more likely looking for Spodumene. Hand specimen shows partly greissenised felsic (plagioclase) groundmass, Patchy coarse muscovite, Brown spotty zonations of SnO2 or Manganese?	CHIP	PEG	OR18025458	0.02	7.57	34.9	30	12.5	2.96	0.06	0.17	1.49	0.6	1	25.7	9.5	0.82	23.2	0.1	2.5		1.83	0.8	31.2	0.02	605	0.31	4.09	100.5	1.5	1670	12.4	590		0.01	0.13
MCRE	69140	Dorchap Peg	EL006486	526063	5945452	1017	TRAPPERS GAP	10	PEG	PEG			Large PEG continued along strike below road from site 608738. Here, PEG widens out into a large mass. 69140 sample: Fine ground apilitic textured PEG. Coarse muscovite zones associated with rare spotty cassiterite or Mn/Tourmaline?. Partly greissenised	CHIP	PEG	OR18025458		6.58	2.3	30	16.75	0.28	0.05	0.1	0.74	0.2	3	18.95	1.6	0.45	20.4	0.08	3.6		0.77		80.7		217	0.19	5.41	127	3.7	2260	11.1	286		0.01
MCRE	69141	Dorchap Peg	EL006486	526053	5945452	1017	TRAPPERS GAP	7.8	PEG	PEG			69141: Coarse grained plagioclase pegmatite, 60% plagioclase/25% qtz.	CHIP	PEG	OR18025458	0.01	7.06	6.6	60	8.01	0.24	0.04	0.26	2.15	0.5	5	27.9	2	0.71	22.2	0.09	2.5		1.62	1.1	85.4	0.02	295	0.26	4.57	90.2	1.3	2050	13.2	520		0.01	0.08
MCRE	69142	Dorchap Peg	EL006486	526046	5945450	1017	TRAPPERS GAP	7.8	PEG	PEG			69142: Similar litho to 69141, Fine spotty Sno2? Or Mn? Oxidised	CHIP	PEG	OR18025458	0.03	7.45	3	10	8.13	0.55	0.03	0.22	0.57	0.4	3	34	0.2	0.57	22	0.09	2.2		2.33		69.6		360	0.21	3.62	81.1	0.9	2170	9.9	710		0.01	0.06
MIRE	69143	Dorchap Peg	EL5315	525736	5947728	1021	SCRUBBY SPUR	1.5	PEG	PEG			Outcrop 1.5-2m wide. Pegmatite exposed on ridge. Grab sample from outcrop. Plagioclase rich PEG, no visible mineralisation	GRAB	PEG	OR18025458		7.58	5.2	70	6.44	0.32	0.22	0.2	1.08	0.4	2	56.7	6.8	0.64	32.2	0.11	1		2.11	0.6	6.6	0.02	202	0.08	3.4	75.4	0.9	1880	12.9	820		0.01	0.07
MIRE	69144	Dorchap Peg	EL5315	523631	5952658	634	GOSPORT	7.1	PEG	PEG			Large outcrop inside bend of Diggers Ck. Strike does not extend far. Thickest part of outcrop at this point. Silica rich pegmatite. Hand specimen shows sandstone rich-silicified rock with zones of coarser qtz-muscovite. No visible mineralisation	CHIP	PEG	OR18034880	0.06	7.51	29.9	10	2.88	0.67	0.08	0.15	1.12	0.2	2	34.9	2	0.53	19.35	0.07	2.1	0.029	1.71	0.5	25.3	0.01	774	0.15	3.81	67.1	0.5	1180	12.4	550		0.01	0.12
MIRE	69145	Dorchap Peg	EL5315	523626	5952666	642	GOSPORT	3	PEG	PEG			Outcrop PEG cuts out just up hill from this sample point. Similar to sample 69144, more silicified sandstone. Minor plagioclase	CHIP	PEG	OR18034880	0.16	7.36	67.4	30	3.35	1.18	0.16	0.17	1.8	0.7	3	36.6	5.4	0.89	19.7		1.2	0.04	1.91	0.9	24.9	0.03	373	0.19	3.25	63.8	1.9	1510	24.3	610			0.19
MIRE	69146	Dorchap Peg	EL5315	526513	5948169	952	SCRUBBY SPUR	6.7	PEG	PEG			Plagioclase 50%/qtz 35%, Fine equigranular groundmass, very siliceous in parts. Partly greissenised/kaolinised	CHIP	PEG	OR18034880	0.02	6.56	2.6	50	3.07	0.31	0.13	0.04	0.39	0.2	4	38.5	14.6	0.54	13.7		0.8		2.72		12.5	0.01	226	0.21	3.95	44.3	1.2	1700	12.3	830			0.08
MIRE	69147	Dorchap Peg	EL5315	526454	5948192	940	SCRUBBY SPUR	4.7	PEG_SN	PEG_SN			Fine grained plagioclase groundmass (apalitic), fine muscovite, Brecciated/Fractured with coarse SnO2-FEOX	CHIP	PEG	OR18034880	0.01	7.2	2.2	60	16.45	1.63	0.16	0.02	0.65	0.5	1	26.6	9.5	0.6	16.2		0.7		2.32		21.5	0.02	263	0.12	3.6	54.7	1	1500	11.5	640			0.1
MIRE	69148	Dorchap Peg	EL5315	526440	5948221	927	SCRUBBY SPUR	6.5	PEG_SN	PEG_SN			Along strike from site 608744. Dyke face wide here. Distinct Kaolinised Plagioclase, apalitic groundmass. Fine grained muscovite. Rare >1mm coarse patches of SnO2 aggregates. Rare Mn on fractures	CHIP	PEG	OR18034880	0.03	7.21	4.1	60	4.46	1.4	0.13	0.09	1.74	1.6	5	27	23.4	0.74	15.9		1	0.017	2.3	1.8	19.6	0.01	472	0.42	3.6	61.8	1.5	1250	9.2	660		0.01	0.09
MIRE	69149	Dorchap Peg	EL5315	526402	5948269	894	SCRUBBY SPUR	5.1	PEG_SN	PEG_SN			Small open cut working at PEG escarpment. Dyke gets very wide here. Again like site 608745.This sample is more oxidised, coarser muscovite. Possible enrichment of SnO2 along Easterly dipping Joints in upper face.	CHIP	PEG	OR18034880	0.02	6.23	5.8	60	18.25	0.56	0.1	0.07	1.24	0.6	4	45.5	30.9	0.7	18.4	0.08	1.5	0.013	1.9	1.5	19.5	0.01	422	0.3	2.98	61	0.8	1480	9.2	710			0.12
MIRE	69150	Dorchap Peg	EL5315	526402	5948263	894	SCRUBBY SPUR	4.9	PEG	PEG			Sth end of outcrop in face of open cut. White-sugary felsic PEG (apalitic). Likely looking for spodumene?	CHIP	PEG	OR18034880	0.08	7.1	8	100	16.75	0.87	0.25	0.05	1.3	1	2	25.5	59.2	0.99	15		1	0.05	1.76	0.9	13.9	0.01	889	0.37	3.59	61.6	1	2620	13.3	540		0.01	0.1
MIRE	69151	Dorchap Peg	EL5315	526022	5947775	985	SCRUBBY SPUR	3	PEG	PEG			Small PEG, offshoot from Whitelaw's (1915)50 ft dyke, as marked on historic Bowonga Lease plan. Qtz-muscovite rich PEG, slightly greissenised. No pronounced mineralisation	CHIP	PEG	OR18034880	0.01	6.99	1.6	40	22.2	0.51	0.15	0.19	0.72	0.2	4	24.1	3.7	0.53	12.4		0.6	0.012	1.92		254	0.01	544	0.24	4.58	43.3	1.1	1820	8.9	410			0.09
MIRE	69152	Dorchap Peg	EL5315	526013	5947790	993	SCRUBBY SPUR	2.8	PEG	PEG			There is an old cut (possible collapsed start of an adit), 20m up hill from this outcrop. Highly siliceous PEG. Oxidised med-coarse qtz-muscovite PEG. No outstanding mineralisation.	CHIP	PEG	OR18034880	0.01	7.62	1.7	120	79.3	0.32	0.19		0.54	0.3	1	19.7	9	0.59	16.8	0.06	0.6		1.69		31.5	0.02	167	0.11	4.01	50.6	0.8	1820	10.5	409			0.05
MIRE	69153	Dorchap Peg	EL5315	525979	5947778	1002	SCRUBBY SPUR	7.1	PEG	PEG			Exposed PEG across hillside, Location of Whitelaw's (1915) 50 ft dyke. Feldspathic (partially kaolinised), fine groundmass (apalitic), Localised sericitic muscovite 'greissen'	CHIP	PEG	OR18034880	0.02	7.43	4.2	170	9.36	0.53	0.19	0.13	1.96	0.3	4	23.8	15.2	0.78	13.45	0.05	0.4	0.026	2.21	1	490	0.04	542	0.3	3.36	40.7	1.2	1510	9.3	410			0.13
MIRE	69154	Dorchap Peg	EL5315	525985	5947778	1002	SCRUBBY SPUR	4.2	PEG	PEG			Fine grained (aplitic), minor Kaolin	CHIP	PEG	OR18034880	0.01	7.4	2.5	80	11.35	2.09	0.1		0.55	0.2	3	25.6	8.4	0.49	10.45		0.2	0.007	2.51		251	0.01	290	0.24	3.81	21.7	1.7	780	10.8	470			0.06
MIRE	69155	Dorchap Peg	EL5315	525990	5947778	1002	SCRUBBY SPUR	4.5	PEG	PEG			Same litho as 69154, with patchy coarse muscovite flakes	CHIP	PEG	OR18034880	0.02	7.39	1.1	130	45.5	0.82	0.16	0.04	0.48	0.1	2	25.2	8.4	0.39	13.4		0.8		2.65		73.2	0.01	142	0.14	4.05	44.7	0.6	1290	13.9	530
MIRE	69156	Dorchap Peg	EL5315	525986	5947768	997	SCRUBBY SPUR	3	PEG	PEG			End of PEG outcrop. Scree hides any outcrop further downhill. Smooth face of outcrop. Bouldery. Sth end of 50ft dyke. Massive Felsic-silica rich PEG, Rare FEOX after sulphide or SnO2.	CHIP	PEG	OR18034880	0.02	6.98	1.1	80	3.47	0.39	0.05	0.13	0.18	0.1	3	22.2	6.3	0.43	7.03	0.06	0.1	0.018	2.82		285	0.01	328	0.24	3.49	24	1.1	880	11.9	500		0.01	0.11
MIRE	69157	Dorchap Peg	EL5315	525992	5947772	1000	SCRUBBY SPUR	7.1	PEG	PEG			Muscovite rich part of PEG. Felsic-aplite groundmass	CHIP	PEG	OR18034880	0.01	7.13	1.3	110	12.25	0.58	0.15		0.69	0.2	2	19.7	7.8	0.56	12.6	0.05	0.4	0.04	2.2		146	0.02	324	0.16	4.18	44.5	0.8	1520	11.6	438			0.11
MIRE	69158	Dorchap Peg	EL5315	525999	5947774	1000	SCRUBBY SPUR	5	PEG	PEG			Feldspathic 'greissen', Mn richer (SnO2?) at left side of this sample interval. Sample ends at Sedimentary boundary	CHIP	PEG	OR18034880	0.02	7.55	1.5	110	42	0.73	0.13	0.03	0.71	0.2	3	26.3	10.7	0.52	13.1	0.05	0.6	0.017	2.48		140.5	0.01	409	0.22	4.26	57	0.4	1750	10.1	560		0.01	0.12
MIRE	69159	Dorchap Peg	EL5315	525995	5947775	1000	SCRUBBY SPUR		PEG	PEG			Fine grained aplite groundmass. Random patches SnO2 adjacent greissen zones of PEG. Coarser muscovite, qtz. One hand specimen shows FEOX haloe against felsic boundary.	GRAB	PEG	OR18034880	0.01	7.64	1	30	13.95	1.1	0.16	0.12	0.79	0.2	3	15.75	11.8	0.54	15.1		0.8	0.042	1.3		181.5	0.01	613	0.23	5.21	87.3	0.7	2100	14.9	311			0.06
MIRE	69160	Dorchap Peg	EL5315	525377	5947598	1048	SCRUBBY SPUR	1.5	PEG_SN	PEG_SN			Small PEG running north-south in strike. Approx 1-1.5m wide. Clearly bounded either side by N-S trending shales-meta seds. 40% qtz, Coarse muscovite flakes, 50% plagioclase. FEOX patches (after sulphides), rare sericite, minor Kaolinisation. Patchy coar	GRAB	PEG	OR18034880		7.54	2.6	40	4.75	0.59	0.24	0.19	1.13	0.6	3	26.8	4.1	0.52	19.65	0.05	3		1.57	0.5	8.7	0.01	708	0.17	4.05	84.9	1.5	2780	17.3	510			0.06
MIRE	69161	Dorchap Peg	EL5315	524073	5954623	545	GOSPORT	2	PEG	PEG			Possibly Mcleods Dyke along strike from a shaft. Shaft is 266° GN from this point and 71m away. Shaft is 3m deep with small crosscut off side. Dyke probably m wide. Small boulder field at site rather than exposed true outcrop. Grab sample. Granitic lo	GRAB	PEG	OR18034880	0.01	6.3	11.2	40	79.9	0.27	0.04	0.08	0.74	0.3	1	91.5	3.3	0.4	20.5	0.05	2		1.48		11.4	0.01	199	0.11	4.62	74.4	1.8	760	17.9	620			0.17
MIRE	69162	Dorchap Peg	EL5315	523404	5954446	583	GOSPORT	7	PEG_SN	PEG_SN			Boulder outcrop-subcrop running sub-parallel to small gully. True outcrop at site 6-8m wide. Blackberries made sampling nearly impossible. SnO2 visible, heavy samples. Partially greissenised PEG, Fine-Med crystallised kaolinsed Plagioclase, patchy FEOX,	GRAB	PEG	OR18034880	0.01	5.64	1.4	10	152	0.4	0.03	0.02	0.41	1.5	3	47	1.6	0.39	15.9		0.9		2.25		3430	0.01	387	0.26	2.76	96.9	0.9	610	12.4	750			0.21
MIRE	69163	Dorchap Peg	EL5315	523444	5954410	571	GOSPORT	7	PEG	PEG			Boulder outcrop, subcrop. Outcrop weathered on west side to FEOX staining, Coarse plagioclase groundmass, partially kaolinsed <30% qtz/Muscovite	CHIP	PEG	OR18034880	0.06	7.01	112.5	120	95.8	0.65	0.04	0.04	0.82	0.6	3	27.6	14.2	0.69	15.95		0.9	0.014	1.97	0.6	860	0.03	117	0.23	3.27	70.9	1.9	870	20	410			0.24
MIRE	69164	Dorchap Peg	EL5315	523404	5954446	583	GOSPORT	7	PEG	PEG			Less oxidised (east end of outcrop), greissenised fine ground felsic-mica groundmass, highly siliceous	CHIP	PEG	OR18034880	0.04	7.11	32.1	30	47.8	0.24	0.04		0.28	0.2	3	61	3.1	0.3	12.35	0.05	0.8	0.023	3.56		93.1	0.01	67	0.18	3.3	49.2	0.9	850	17.4	840			0.15
MIRE	69165	Dorchap Peg	EL5315	523540	5953419	614	GOSPORT	2	GRN	GRN			Old BHP37 referenced dyke. Boulder outcrop at side of small gully. Traceable up hill, but is only about 1m wide in places. Subcrop where sampled 2-3m wide at best. Boulder field. Pegmatite looks more granitic in texture, silicified sandstone	GRAB	GRN	OR18034880	0.02	6.56	63.7	30	5.48	1.56	0.09	0.09	5.99	0.2	2	37.3	3.6	0.47	17.7	0.05	1.9	0.042	2.48	2.9	24.3	0.02	216	0.12	3.38	67.8	1	1290	17.2	610		0.01	0.15
MIRE	69166	Dorchap Peg	EL5315	523704	5952430	646	GOSPORT	5.5	PEG	PEG			True width of outcrop partially obscure by surface soil. True width about 5.5m. Plagioclase rich PEG, partly Kaolinised, Slight aplitic texture	CHIP	PEG	OR18034880	0.02	7.51	10.5	30	42.2	0.65	0.03	0.09	0.45	0.2	3	62.4	1.3	0.46	17.05		1.5	0.09	2.53		810	0.02	125	0.27	3.42	83.3	1	610	13.7	880			0.1
MIRE	69167	Dorchap Peg	EL5315	523707	5952428	649	GOSPORT	3.4	PEG	PEG			Aplitic texture, sugary plagioclase-qtz matrix. Partly kaolinised. Patchy aggregates of SnO2? Or Mn. No strong muscovite visible	CHIP	PEG	OR18034880	0.02	6.65	4.7	10	44.5	0.44	0.03		0.24	0.1	3	56.6	1.1	0.36	16.4		1.6	0.021	2.42		1190		129	0.25	3.25	74	0.4	1450	6.9	950			0.12
MIRE	69168	Dorchap Peg	EL5315	523736	5952339	661	GOSPORT	3.3	PEG	PEG			Sample ends at a QTZ filled joint (fault or shear?), sandstone rich rock face. Fine feldspathic (plagioclase) aplitic texture, qtz rich (60%). No strong muscovite, partly kaolinised	CHIP	PEG	OR18034880	0.07	7.99	8.1	30	18.4	0.96	0.09	0.09	2.37	0.7	4	42.7	1.5	0.63	15.5		1.3	0.017	3.19	1.1	480	0.03	375	0.27	3.03	76.1	1.4	1810	18.5	860			0.12
MIRE	69169	Dorchap Peg	EL5315	523738	5952343	661	GOSPORT	5.6	PEG	PEG			Mn Rich in fractures of PEG. Sandstone rich PEG, Plagioclase (Partly kaolinised), Qtz, very fine muscovite, crystals all mm, patchy Mn, Fe (or Sno2?) on sandstone rich PEG (see handspecimen)	CHIP	PEG	OR18034880	0.12	7.47	2.3	70	51.3	1.14	0.17	0.19	0.71	0.7	1	37	1.3	0.52	17.9		1		2.87	0.5	283	0.01	385	0.11	3.49	66.6	0.9	1870	17.9	780			0.13
MIRE	69170	Dorchap Peg	EL5315	523728	5952356	661	GOSPORT	4.4	PEG	PEG			Plagioclase rich PEG (25% qtz), Fine muscovite, oxidised groundmass (red colour)	CHIP	PEG	OR18034880	0.04	8.09	88	60	11.85	0.87	0.2	0.1	1.26	0.5	3	34.8	1.3	0.65	20.9		0.7		3.41	0.9	420	0.03	253	0.22	2.47	62.7	1.3	1380	20.5	830			0.11
MIRE	69171	Dorchap Peg	EL5315	523719	5952370	661	GOSPORT	6	PEG	PEG			PEG intruded (stringers) within altered Sandstone, Plagioclase rich groundmass (2mm crystals), Pervassive mica groundmass. Small injected qtz stringers, heavily oxidised	CHIP	PEG	OR18034880	0.12	7.6	54.6	100	11	1.19	0.21	0.28	0.66	0.2	2	37.6	1.7	0.54	19.65		0.8	0.023	3.81		168	0.01	513	0.35	2.69	58.1	0.6	2480	19.9	920		0.01	0.09
MIRE	69172	Dorchap Peg	EL5315	523718	5952382	662	GOSPORT	4.6	PEG	PEG			Outcrop-subcrop, northern edge of PEG outcrop. Strong sandstone with silica alteration from PEG intrusion. Qtz 50% groundmass, patchy plagioclase with preferential Kaolin alteration, rare Manganese on fractures	CHIP	PEG	OR18034880	0.07	7.19	29.1	100	41	0.84	0.22	0.17	7.02	0.3	6	44.2	1.2	0.49	20.8		1.7	0.047	2.43	3.8	240	0.06	197	0.24	3.56	66.7	1.4	2220	16.3	660			0.18
MIRE	69173	Dorchap Peg	EL5315	523843	5952533	694	GOSPORT #3	4.5	PEG	PEG			Deep trench-cut approx 3.5m deep X 10m long x 1.5m wide sunk approx sub parallel to PEG strike. PEG is only present as subcrop along strike to SW. Heavily kaolinised plagioclase (relict crystals), minor Mn or SnO2.	CHIP	PEG	OR18034880	0.06	7.29	27.1	30	21.4	0.63	0.04	0.24	7.35	1.8	2	58.4	1.9	0.59	21.1	0.06	1.8	0.045	2.74	14.1	770	0.01	781	0.15	2.68	71.5	2.4	1230	14.7	900			0.14
MIRE	69174	Dorchap Peg	EL5315	523843	5952533	694	GOSPORT #3	4.5	PEG	PEG			PEG with multiple joints at angle around 30° SW. Highly Mn along fractures. End of sample ends in sediments. Rich SnO2?-spodumene?, greissen looks controlled by joint sets (photo), plagioclase alterated to patchy Kaolin	CHIP	PEG	OR18034880	0.11	6.76	10.6	20	23.7	0.44	0.03	0.33	1.01	3.9	3	43.2	0.9	0.49	17.85		1.8	0.024	2.47	2.5	1730		840	0.26	3.27	87.7	1.3	1300	48	760			0.12
MIRE	69175	Dorchap Peg	EL5315	523855	5952533	699	GOSPORT #3	4.5	PEG	PEG			K-Spar? Or oxidised Ca-rich plagioclase groundmass, biotite, Fe or Mn, Sno2 patches preferentially within kaolinised plagioclase parts (see handspecimen)	CHIP	PEG	OR18034880	0.06	6.79	5.6	30	6.12	0.49	0.02	0.2	1.46	7.7	2	49.2	1.1	0.35	18.35	0.05	1.6	0.011	2.69	5.6	2600	0.01	640	0.16	2.06	70.8	2.3	840	10.4	860			0.07
MIRE	69176	Dorchap Peg	EL5315	523855	5952533	699	GOSPORT #3	4.5	PEG	PEG			Crystalline qtz with SnO2 in partially kaolinised plagioclase. Mica-sericitic	CHIP	PEG	OR18034880	0.03	7.33	19.9	40	57.9	0.56	0.1	0.33	11.65	3.3	6	55.3	1.2	0.78	20.7	0.06	2.5		1.92	18	620	0.03	661	0.21	2.96	89.9	1.3	1550	9.4	710			0.1
MIRE	69177	Dorchap Peg	EL5315	523739	5951987	693	GOSPORT	2	PEG	PEG			Small PEG striking about E-W. Width approx 2m. Grab sample. Sedimentary boundary either Side. Aplitic Plagioclase groundmass with crystalline qtz, muscovite patches, partly sericitised	GRAB	PEG	OR18034880	0.04	7.77	2.4	20	7.19	0.54	0.09	0.09	0.39	0.2	2	51.7	1.1	0.4	20.9		0.6	0.023	3.37		74.9		380	0.1	3.07	68.1	0.9	1640	16.2	1050			0.1
MCRE	69178	Dorchap Peg	EL006486	527377	5946859	882	TRAPPERS GAP	6.9	PEG	PEG			Location of 25ft dyke on Bowonga Tin lease plan, 2 types of PEG textures. 1-equigranular Qtz-Plag-muscovite PEG, minor FEOX staining, no mineralisation visible. 2- Aplitic plagioclase rich PEG, rare FEOX stains after sulphides or cassiterite	CHIP	PEG	OR18034880	0.02	7.36	6.3	50	7.57	0.46	0.1	0.89	0.99	0.4	3	62.3	3.2	0.68	21.6	0.05	1.5	0.034	3.15	0.6	30.2	0.01	386	0.29	2.61	59.8	1.1	1720	31.8	1050		0.01	0.19
MCRE	69179	Dorchap Peg	EL006486	527382	5946852	885	TRAPPERS GAP	6	PEG	PEG			Med grained PEG. Qtz-Plag (50:50%), Minor Mn Oxide staining in fractures. Adjacent sediments partly silicified	CHIP	PEG	OR18034880	0.01	7.69	4.3	80	7.55	0.55	0.18	0.19	1.86	0.7	3	33.4	2.3	0.49	23.9		2.1		1.56	1	35.7	0.01	683	0.25	3.36	82.6	2.1	2910	11.4	610			0.08
MCRE	69180	Dorchap Peg	EL006486	527361	5946865	883	TRAPPERS GAP		PEG	PEG			Outcrop partly subcropping showing piles of small boulders. Further west from here, PEG gets thin and is just traceable to roadside. PEG looks sub-granitic, biotite. Hand specimen from roadside shows kaolinised plagioclase	GRAB	PEG	OR18034880	0.02	6.85	2.5	30	7.59	0.45	0.07	0.11	0.59	0.2	3	63	3.4	0.5	19.65		1.7		2.07		26.4	0.01	317	0.2	3.84	57.7	0.9	1370	14.5	740			0.1
MCRE	69181	Dorchap Peg	EL006486	527692	5946775	863	TRAPPERS GAP	6.5	PEG	PEG			Silica rich med-crystalline PEG, no pronounced mineralisation	CHIP	PEG	OR18034880	0.08	7.58	31.5	30	5.82	4.58	0.1	0.24	0.73	0.3	2	36	5.1	0.58	19.15		0.7	0.081	2.48		37.7	0.01	602	0.17	3.38	68.3	1.3	1820	18.1	820			0.13
MCRE	69182	Dorchap Peg	EL006486	527689	5946772	868	TRAPPERS GAP	5.3	PEG	PEG			Two broad zonations of PEG. Sth side of outcrop, coarse muscovite-qtz; middle to Nth side of PEG (end of this sample), aplitic texture with minor FEOX/Mn staining. Highly siliceous (see handspecimens)	CHIP	PEG	OR18034880	0.1	6.71	5.8	30	33	0.4	0.09	0.02	1.66	0.3	3	59.8	3	0.43	17.65	0.05	1.1	0.01	1.6	0.8	60.6	0.02	169	0.32	3.81	52.2	2.3	1240	15.1	610			0.11
MCRE	69183	Dorchap Peg	EL006486	527604	5946779	867	TRAPPERS GAP	6.3	PEG	PEG			50:50% Plag-qtz groundmass. Fine muscovite haloes (mm), No strong mineralisation, Patchy very fine oxidised spots (after sulphides?)	CHIP	PEG	OR18034880	0.03	6.81	3.2	50	11.45	0.71	0.1	0.13	0.52	0.3	3	110	4.2	0.44	16.45		0.9	0.045	3.78		54.6	0.01	378	0.25	2.72	35	1.3	1690	15.3	1240			0.08
MCRE	69184	Dorchap Peg	EL006486	527692	5946765	861	TRAPPERS GAP		PEG	PEG			Plagioclase rich PEG, 60% plag, 40% qtz, no large muscovite flakes (mm), Groundmass nearly aplitic in texture	GRAB	PEG	OR18034880	0.03	7.11	15.3	30	16.1	0.15	0.11	0.07	1.17	1.1	4	73.4	6.5	0.69	23.2	0.05	1.9	0.054	1.55	0.6	36	0.01	352	0.21	3.53	70.4	1.9	1400	8.7	680			0.11
MIRE	69185	Dorchap Peg	EL5315	530191	5943814	803	RODDA SPUR	1.5	PEG		PEG		Coarse muscovite blades/flakes, silica rich PEG, No visible mineralisation. Sub-Crop	GRAB	PEG	OR18034880	0.02	7.32	2.5	10	47.5	0.15	0.02	0.04	0.66	0.7	1	35.4	1.7	0.44	18.75		1.2	0.04	2	0.8	50.6	0.01	129	0.12	3.3	67	2.4	640	19.4	620			0.09
MIRE	69186	Dorchap Peg	EL5315	529969	5943565	745	RODDA SPUR	1	PEG		PEG		Equal Qtz-Plag, Med muscovite flakes mm. FEOX from weathering, no visible mineralisation	GRAB	PEG	OR18034880	0.05	7.2	22	60	5.85	0.9	0.04	0.03	0.62	0.4	3	24.9	5.6	0.52	25.4		1		1.88		24.4	0.02	198	0.26	3.39	68.8	1.8	910	22.3	560			0.05
MIRE	69187	Dorchap Peg	EL5315	529031	5942917	738	RODDA SPUR	5	PEG	PEG			Pegmatite with more granitic textures. Equal Qtz-Plag, 3-5mm crystals. Rare fine tourmaline, random rare >5mm muscovite flakes. Possible striated spodumene or qtz (see circled area on hand specimen)	GRAB	PEG	OR18034880	0.05	7.68	13.5	40	5.59	0.99	0.23	0.16	1.32	0.2	3	18.75	7.5	0.59	24.3		0.7	0.051	2.64	0.6	84.3	0.02	293	0.42	2.7	51.3	1	3400	19.7	510			0.12
MCRE	69188	Dorchap Peg	EL006486	523413	5946734	915	SHORTCUT	3.3	PEG	PEG			PEG traced downhill. Sinuous widths of 1-3m along strike. Multiple zones within pegmatite. Crystals between 3-10mm in size. Large flakey muscovite, White plag, vitreous qtz, Manganese staining	CHIP	PEG	OR18034880	0.02	7.41	36.9	20	7.52	2.3	0.05	0.23	1.76	0.5	4	51.1	5.2	0.72	23.9		1.9		2.68	0.7	21.4	0.02	1240	0.26	3	60.5	2	1690	12.9	640			0.08
MIRE	69189	Dorchap Peg	EL5315	515354	5949502	1082	ESKDALE SPUR	5.4	PEG	PEG			Very coarse PEG, Muscovite flakes often >10mm in size. 50:50% Plag:Qtz, Weathering stains	CHIP	PEG	OR18034880	0.01	6.21	7.4	20	13	0.12	0.11	0.05	2.15	0.3	1	47.9	3	0.55	20.1		2.1	0.033	1.39	1	34.9	0.03	521	0.08	2.97	46.7	1.4	1220	14.7	440			0.06
MIRE	69190	Dorchap Peg	EL5315	515362	5949496	1080	ESKDALE SPUR	3.9	PEG	PEG			Coarse muscovite, Plag 65%:25% Qtz groundmass, PEG crystals >5mm in size. Heavily iron stained, Rare patchy SnO2?	CHIP	PEG	OR18034880	0.01	5.84	4	10	48.3	0.42	0.05	0.24	0.34	0.3	3	255	0.6	0.44	24.1		1.2	0.024	3.58		30.7		522	0.28	2.44	50.3	0.7	1950	23.2	1760			0.12
MIRE	69191	Dorchap Peg	EL5315	515366	5949496	1080	ESKDALE SPUR	2.2	PEG_SN	PEG_SN			Patcy FEOX-Manganese, Coarse >10mm muscovite flakes, Plag rich groundmass (Partly kaolinised), Rare cassiterite, Patch of greissen?	CHIP	PEG	OR18034880	0.02	7.79	8.5	20	9.65	1.48	0.09	0.3	1.02	0.4	3	114.5	22	0.68	29.6	0.11	1.8	0.052	1.82	0.5	21.1	0.03	458	0.24	3.12	76.1	1.2	1390	16.8	840			0.13
MIRE	69192	Dorchap Peg	EL5315	515335	5949551	1082	ESKDALE SPUR	4.6	PEG	PEG			Bouldery outcrop, PEG with 5-10cm feldspar crystals, same lithology as 69190, 69189	CHIP	PEG	OR18034880	0.03	6.19	7.1	10	14.7	0.68	0.07	0.26	0.6	0.2	4	116.5	3.8	0.76	30.4		2.1		1.97		239	0.01	766	0.22	2.64	87.2	1.1	2100	4.9	1010			0.27
MIRE	69193	Dorchap Peg	EL5315	515348	5949528	1082	ESKDALE SPUR	6	PEG	PEG			Sliver of Schist/Shale within PEG exposed here (Photo), West end of outcrop, siliceous sandstone, aplilitic. Centre and East end of outcrop, coarse muscovite flakes, patchy kaolinised Plag, Clear crystalline qtz, heavy specimens, oxidised outcrop. Rare	CHIP	PEG	OR18034880	0.01	7.34	19	30	3.15	2.44	0.07	0.17	1.4	0.5	2	21.7	4.2	0.75	18.2		1.6	0.042	1.82	0.7	26.9	0.03	572	0.15	3.59	19.8	2.1	1220	16.2	374			0.13
MIRE	69197	Dorchap Peg	EL5315	515201	5950133	1036	ESKDALE SPUR	8.3	PEG	PEG			Sub-granitic PEG. K-spar rich groundmass, 5mm crystals, 30% Qtz. Rare tourmaline in crystallised zones where muscovite flakes have developed. FEOX groundmass, rare Mn in fractures	CHIP	PEG	OR18034880	0.04	7.14	14.5	10	2.15	1.24	0.06	0.35	1.59	0.1	2	18.45	2.6	0.83	18.15		1.8	0.027	3	0.6	25.7	0.01	2390	0.24	3.26	19.4	0.7	1170	10.9	500			0.07
MIRE	69198	Dorchap Peg	EL5315	515239	5950089	1047	ESKDALE SPUR		GRN	GRN			Boulder field on top of outcrop. PEG-GRN boundary not completed to sth due to no mineralisation visible. Further STH, outcrop becomes GRN and full of tourmaline.	GRAB	GRN	OR18034880	0.11	7.61	91	20	1.59	7.22	0.06	0.11	2.31	0.2	4	10.4	7.1	0.86	17.3		0.7	0.029	3.31	1.1	11.3	0.02	784	0.29	2.91	15.5	0.8	1020	25.1	384		0.01	1.95
MIRE	69199	Dorchap Peg	EL5315	515303	5949614	1080	ESKDALE SPUR	4	PEG	PEG			Boulder field outcrop approx 4m wide. Granite (aplitic) abuts PEG immediately to SE. PEG litho: >10mm muscovite flakes, Minor Mn staining	GRAB	PEG	OR18034880	0.01	6.48	5.4	10	3	0.48	0.04	0.16	1.78	0.3	5	30.6	4.7	0.73	23.2		2	0.018	2.02	0.8	25.5	0.03	656	0.29	2.55	78.8	2.7	700	9.3	500			0.09
MIRE	69200	Dorchap Peg	EL5315	515319	5949588	1080	ESKDALE SPUR		GRN	GRN			Plag rich granite, 1mm crystals, equigranular textures, patchy FEOX haloes (See handspecimen). This granite seems to from intrusion at edge of NW striking coarse PEG	GRAB	GRN	OR18034880	0.03	6.63	12.7	10	3.41	1.21	0.03	0.14	0.73	0.2	1	47.1	5.7	0.61	22.9		1.9		3.11		15.1	0.01	937	0.13	2.72	79.7	1.3	980	11.3	770			0.12
MIRE	69201	Dorchap Peg	EL5315	515326	5949556	1079	ESKDALE SPUR		PEG	PEG			Boulder field of PEG below intruded adjacent GRN. 10mm muscovite flakes, 40% Qtz: Plag. Random coarse 5mm tourmaline crystals.	GRAB	PEG	OR18034880		7.96	17.2	20	7.4	0.77	0.07	0.29	1.78	0.2	4	98.7	1.4	0.86	27.9		2.8		2.43	0.8	44.3	0.03	1230	0.25	2.44	64.9	2.4	1010	11.2	780			0.09
MIRE	69202	Dorchap Peg	EL5315	524246	5959264	878		1.4	PEG	PEG				CHIP	PEG	AD18185887		8.22969	0.01				0.157233					33.7		0.482619					2.26631		70	0.0603064	309.789			87				626		0.01
MIRE	69203	Dorchap Peg	EL5315	524280	5959243	893		2	PEG	PEG			Fine fspar rich g.mass, some large fspar xstals, some zonesof 100mm+ clots of quartz and musc, poss 0 mm wide petalite xstals w fspar v. minor. Dyke m wide	CHIP	PEG	AD18185887		8.17677	0.02				0.0214408					24.7		0.580541					1.87614		40	0.0180919	154.895			78				562		0.01
MIRE	69204	Dorchap Peg	EL5315	524182	5959091	800		1	PEG	PEG			Peg fine fspar gmass, 30% large fspar xstals up to 100X 40mm, minor20% blue clots of quartz xstals - shart contacts w spotted pelitic schists, ? Poss 1x petalite xstal 80X 20 mm HELI target 393 -SEDS found 1m wide in gully HT 394 SED O/C	CHIP	PEG	AD18185887		7.91215	0.01				0.221555					58.1		0.622508					2.54026		20	0.0301532	697.026			63				971		0.01
SRE	69233	Dorchap Peg	EL006300	522817	5957374	750		10	PEG	PEG			60% O/C with rest S?C predom PAG, minor flat sediment inclusions, minor float on steep N slope. Zones pf fine to aplitic text PEG pronounced apple green weathering layer - abundant fine mica	CHIP	PEG	AD18185887		7.85922	0.01	69.9			0.171527		8.4		10	70.5		0.720431	28.3		3.2		3.17948	4.4	240	0.0482451	774.473			73				916
SRE	69234	Dorchap Peg	EL006300	522805	5957371	748		10	PEG	PEG			60% PEG 40% SED BAR - flat inclusion in dyke and vars (vert?) F-spar rich, minor coarse book mica, some green weathering nature. Predom fine xtaline nature	CHIP		AD18185887		7.56814	0.01				0.150086					123.5		1.07015					2.60667		370	0.199011	619.579			49				773		0.01
SRE	69235	Dorchap Peg	EL006300	522801	5957363	748		3.5	PEG	PEG			PEG Med-fine nearly aplitic f-spar-qtz-mica, minor zone coarse as veins of pegmatite with aplite. Some green weathering features (v. pronounced)	CHIP		AD18185887		6.98598	0.01				0.128645					58.8		1.18207					2.97194		180	0.108551	1084.26			55				834		0.01
SRE	69236	Dorchap Peg	EL006300	522782	5957396	711		5	PEG	PEG				CHIP		AD18185887		8.30908					0.0786164					44.6		0.412674					4.69866		80	0.0120613	154.895			46				1120		0.01
SRE		Dorchap Peg	EL006300	522778	5957381	723			PEG	PEG			SW PEG split 1m wide nose of SW dyke split. Predom coarse/med xtaline peg - clots of mica 150mm dia, sharp sed contact. (Fspar dom coarse xtals 30-40% qtz w minor book mica) No vis petalite.	CHIP	PEG			0
SRE	69237	Dorchap Peg	EL006300	522810	5957555	654		2.5	PEG	PEG			Med xtaline peg poss translucent petalite - v minor. Some apple to chlorite coloured green/blue weathering halo to surface. Fspar dom gmass, 10mm qtz xtals - v minor translucent highly cleaved petalite. Sediment contact sharp on W-side diffuse under scr	CHIP	PEG	AD18185887	0.02	7.27706	0.01	147	50.6	0.61	0.13		15.6	0.4	10	185	2.9	0.86032	33.8	0.08	3.2		3.9	7.4	213	0.15	328	0.14	1.56	97.1	1.7	2630	14.5	1055		0.01	0.33
SRE	69238	Dorchap Peg	EL006300	522754	5957644	599		10	PEG	PEG			Massive outcrop of Peg, irreg zones of coarse fspar + Petalite (?) 200 x 300 mm zones Surrounded by mgr fspar/ qtz mass, green surface weathering layer. Blocky fol shows some fine gr fspar/qtz blocks to contacts	CHIP	PEG	AD18185887		7.64753	0.01				0.0571755					32.6		0.979226					2.97194		100	0.0180919	1161.71			56				762		0.01
SRE	69239	Dorchap Peg	EL006300	522832	5957591	639		7	PEG	PEG			Fgr-mgr fspar/qtz gmass - minor fine musc, lines of fine Mn stains. V minor clots of fspar - heavily cleaved. Less than 10% peg. 100% OC	CHIP	PEG	AD18185887		7.40937	0.01				0.0500286					24.2		0.748409					2.7312		100	0.0301532	1239.16			40				540		0.01
MIRE	69240	Dorchap Peg	EL5135	524482	5957927	893		5	PEG	PEG			Coarse xtaline Peg showing large petalite xtals up to 300X 600 mm. Lenticular outcrop up to 15 x 5 m. Petalite random but clustered in distribution. Dom xtal ditrection poss + to dyke strike. Groundmass quartz/ fspar dom, v minor qtz in gmass mostly sil	CHIP	PEG	AD18185887	0.02	6.99	1.6	30	77	0.19	0.07		0.39	0.2	1	70.4	1.7	0.39	22.9	0.09	1.4		2.36		1660	0.01	149	0.11	3.49	90.8	0.9	1000	13.5	894		0.01	0.1
MIRE	69241	Dorchap Peg	EL5315	524438	5957969	897		1.5	PEG	PEG			PEG strong foliation along 330G strike - elongate fspar in foln but most vis petalite (+100 x 10mm) is 90 to foln direction and not rotated. Petalite xtals alos in clusters, O/C shows less than 10% petlaite . Xtals loo to dip appr 70 S internally (irre	CHIP	PEG	AD18185887		8.38846	0.01				0.0714694					61.3		0.461635					2.68969		2890	0.0120613	232.342			77				662		0.01
MIRE	69242	Dorchap Peg	EL5315	524425	5958006	900		2.5	PEG	PEG	PEG		Med - coarse Peg more mica than main dyke @ESKII site. Some coarse PET up to 60 x 30 mm Poss O/C or S/C as 2.5 m SC. Quartz appears in clusters. No strong foliation in PEG. 2.5 m wide O/C sample @ 220G	CHIP	PEG	AD18185887		8.17677	0.01				0.0214408					39.7		0.419668					2.24971		2180	0.0120613	154.895			84				613
MIRE	69243	Dorchap Peg	EL5315	524441	5957990	902		1.5	PEG	PEG			PEG coarse, fspar dominant with minor fine gmass zones with no large xtals, zones/ clots are mica rich. Poss minor petalite xtals poorly cleaved. 3m sample at 180	CHIP	PEG	AD18185887		8.67954	0.01				0.157233					33.2		0.370707					2.29952		230	0.0120613	232.342			78				653		0.01
MIRE	69244	Dorchap Peg	EL5315	524421	5957977	900		1.5	PEG	PEG			PEG coarse-med fspar dom, minor fine muscovite, no vis petalite. 1.5m o/C includes S/C prob IS)	CHIP	PEG	AD18185887		8.38846	0.01				0.0714694					33.8		0.489613					2.55687		270	0.0301532	154.895			71				541		0.01
MIRE	69245	Dorchap Peg	EL5315	524488	5957916	897		2.5	PEG	PEG			Coarse PEG, well foliated. 100% O/C	CHIP	PEG	AD18185887	0.03	7.42	3	20	127	1.19	0.07		0.31	0.3	6	53.9	1	0.34	21.9	0.16	2.4		2.84		1550	0.02	169	0.17	3.28	128	2.3	830	19.7	800		0.01	0.1
MIRE	69246	Dorchap Peg	EL5315	524533	5957877	935		2.5	PEG	PEG			generally fine- medium gmass, core of 8 x 2.5 O/C shows large quartz core running // to strike. PEG B appears to show some silica floodingwith weathered pink fspars. The dyke is strongly foliated esp // to quartz core zone - // elongate felspar xtals. W	CHIP	PEG	AD18185887		8.07092	0.01				0.0571755					61		0.482619					2.83912		260	0.0603064	309.789			79				956
MIRE	69247	Dorchap Peg	EL5315	524515	5957905	930		3	PEG	PEG			E-side clear sediment contact - vertical. Predominant fine-med gmass, some coarse xtals of fspar, minor muscovite. Visible petalite less than 30mm wide - looks minor in O/C 8x3m O/C	CHIP	PEG	AD18185887		8.22969	0.01				0.121498					44.6		0.447646					2.49045		240	0.0482451	232.342			88				792		0.01
MIRE	69248	Dorchap Peg	EL5315	524566	5957830	928		1	PEG	PEG	PEG		Fragmented silica rich PEG - coarse petalite up to 150 x 40mm 1m wide O/C. 100%O/C	CHIP	PEG	AD18185887		8.44139	0.01				0.107204					26.4		0.279779					1.85124		50	0.0120613	77.4473			89				549		0.01
MIRE	69249	Dorchap Peg	EL5315	524544	5957843	922		2	PEG	PEG			Predominantly coarse petalite xtals up to 30 x 50m (minotr in PEG) Abundant qtz veins up to 50 x 1000mm showing undulose dip. PEG A shows more mica and less silica flood than PEG B to the E. TW greater than 2m contactsunder cover 100% O/C. Float 1m up	CHIP		AD18185887		8.22969					0.0500286					41.2		0.342729					4.04284		220	0.0120613	154.895			50				739		0.01
MIRE	69250	Dorchap Peg	EL5315	524566	5957801	918			PEG	PEG			Strongly foliated PEG at dyke margins - // to strike - centre of dyke is coarse crystalline fspar in a silica rich gmass - v minor v coarse petalite on e SIDE UP TO 80 X 150 MM. 5.5 +tw E side under cover. Sampled at 090	CHIP		AD18185887		8.1503	0.01				0.0285878					28.6		0.349724					2.63158		2290		232.342			50				623		0.01
MIRE	69252	Dorchap Peg	EL5315	524496	5957891	908		8	PEG	PEG			70 % Outcrop, sample 8m at 220° strike	CHIP	PEG	AD18185887	0.04	7.31	5.6	20	79.9	0.47	0.08		1	0.3	2	45.2	1.2	0.31	20.7	0.16	2.5		2.13	0.5	2030	0.02	126	0.05	3.89	92	0.9	1040	19.2	698			0.12
MIRE	69253	Dorchap Peg	EL5315	524493	5957907	908		1	PEG	PEG			Highly foliated fine-med crystalised PEG, mod silica flooding, clean sediment contact on W side. W contact taken as structural measurement.	CHIP	PEG	AD18185887		8.33554	0.01				0.100057					51.5		0.398685					2.34103		880	0.0301532	154.895			85				666		0.01
MIRE	69254	Dorchap Peg	EL5315	524476	5957921	886		3	PEG	PEG			Coarse PEG, strong Petalite crystals-Probable sediment lens with variable amonts of PEG A Outcrop and this island-mod silica rich (see sketch on paper log)	CHIP	PEG	AD18185887		7.96507					0.0929102					40		0.356718					2.7727		600	0.0120613	154.895			78				732
MIRE	69251	Dorchap Peg	EL5315	524503	5957925	896		1.5	PEG	PEG			PEG B. Normal coarse PEG. Minor clustered Petalite up to 100 X 20mm crystals, minor QTZ veining and less silica flood than to the SE where it narrows considerally. West contact has sediment contact (see structural reading)	CHIP	PEG	AD18185887		8.12384	0.01				0.128645					38.4		0.398685					2.45725		200	0.0603064	232.342			75				657		0.01
MIRE	69255	Dorchap Peg	EL5315	524454	5957986	911		4	PEG	PEG			PEG B - strongly foliated and silicified fgr. G.mass - esp. W side. ~60% O/C - rest soil. 6m TW (approx). 4m sampled.	CHIP		AD18185887		8.17677	0.02				0.0714694					27.7		0.391691					1.87614		120	0.0120613	154.895			79				496		0.01
MIRE	69256	Dorchap Peg	EL5315	524474	5957962	906		3	PEG	PEG			PEG as for 608854. Less foliated, more massive dyke. Sample Line 3m TW towards 220G	CHIP		AD18185887		8.362	0.01				0.0929102					34		0.46863					2.09198		120	0.0120613	232.342			97				643		0.01
MIRE	69257	Dorchap Peg	EL5315	524388	5958032	887		5	PEG	PEG			Coarse PEG B - appears silicified and more micas. Mod - Stgly foliated (Esp NE Wall) contact against sediment. Prominent X-faulting, no obvious offsets but occurs @ strike changes. V. minor coarse petalite. Sample Line 5m @ 220 (Petalite up to 100x40	CHIP		AD18185887		8.17677	0.01				0.121498					29.4		0.426663					1.84294		100	0.0120613	619.579			91				541		0.01
MIRE	69258	Dorchap Peg	EL5315	524625	5957895	959		2.5	PEG	PEG			Coarse f/spar, mica, qtz. Areas of coarse PETALITE up to 50 x 100mm, minor aplite grainmass. Qtz as veins and groundmass-possible chilled margin. 100% outcrop in small depression/pit (2.5m X 4m). PEG D	CHIP	PEG	AD18209622		8.83832					0.0214408					69.9		0.608519					5.82766		40	0.0301532	309.789			54				1610		0.01
MIRE	69259	Dorchap Peg	EL5315	524655	5957857	966		1.5	PEG	PEG			Fine aplitic groundmass as zones (up to 200mm x 300mm clots), with remaining qtz rich groundmass. Med muscovite. No visible PET, Minor qtz veining. 2 X 1.5m Outcrop. PEG D	CHIP	PEG	AD18209622		8.65308	0.01				0.00714694					73.3		0.538575					4.19226		40	0.0301532	309.789			62				1365		0.01
MIRE	69260	Dorchap Peg	EL5315	523167	5957451	681		2.5	PEG	PEG			Strongly foliated PEG, chilled margins/contacts-aplitic texture. Qtz (massive) near margins, F-Spar dominant, minor mica, qtz as veins and large clots up to 300mm x 200mm.	CHIP	PEG	AD18209622		6.8272					0.0714694					41.5		0.517591					3.11307		50	0.0180919	232.342			71				988		0.01
MIRE	69261	Dorchap Peg	EL5315	523158	5957460	670		6	PEG	PEG			Coarse PEG with possible PET 50 x 100mm. Appears feldspar dominant.	CHIP	PEG	AD18209622		8.5737					0.100057					44		0.440652					4.65715		40	0.0482451	464.684			48				1340		0.11
MIRE	69262	Dorchap Peg	EL5315	523148	5957638	611		8	PEG	PEG			Medium x-taline PEG, f/spar rich g/mass with abundant mica in zone-these appear as closts within a highly variable crystal size PEG, some foliation to strike. Some large f/spar crystals, possible qtz core on sample section line @ 8m. Mark in dyke (see s	CHIP	PEG	AD18209622		8.49431	0.01									52.3		0.909282					3.62776		220	0.0482451	619.579			61				954		0.01
MIRE	69263	Dorchap Peg	EL5315	523147	5957630	612		8	PEG	PEG			Same PEG lithology as site 608867, Possible coarser mica. No VISIBLE PET	CHIP	PEG	AD18209622		8.28261										35.1		0.818354					2.92213		270	0.0180919	774.473			78				737		0.01
SRE	69264	Dorchap Peg	EL006300	522772	5957142	811		3	PEG	PEG			Fine mica rich PEG, minor coarse QTZ/F/spar, Mn staining. 3m true width, appears dipping steeply	CHIP	PEG	AD18209622		8.362	0.01									60.2		0.720431					2.31612		110	0.0120613	619.579			138				965
SRE	69265	Dorchap Peg	EL006300	522776	5957197	811		2	PEG	PEG			Generally fine g/mass with long stringers of f/spar parallel to strike and dip of PEG, up to 30mm wide. Possible PET 20 X 80mm, well exposed overhang with no moss. LOW PRIORITY TARGET (see field note sketch)	CHIP	PEG	AD18209622		8.38846	0.01									36.1		1.06316					2.7561		80	0.0180919	542.131			80				760
SRE	69266	Dorchap Peg	EL006300	522855	5957200	835			GRN	GRN			Microgranite, QTZ/F/spar, 2% fine schorl tourmaline needles. Grab geochemical sample taken from 4m wide pipelike outcrop, possible intrusion explains quartzite at site 608870 site	GRAB	GRN	AD18209622		7.51522										23.9		0.881304					2.39084		40	0.0120613	2168.53			63				498
MIRE	69267	Dorchap Peg	EL5315	523221	5957141	830		2.2	PEG	PEG			fine grain g/mass, mica (fine) and v minor coarse QTZ. No visible PET, mossy outcrop.	CHIP	PEG	AD18209622		8.78539	0.01									28.4		0.580541					3.12967		50	0.0180919	619.579			78				799
MIRE	69268	Dorchap Peg	EL5315	523415	5957801	585		1.7	PEG	PEG			Exposed PEG on SE wall of old collapsed shaft sunk for tin. (see sketch map on back of field notes). Silica rich greissen matrix, blebby fine cassiterite or Mn. 1-5mm plagioclase crystals, fine sericite. S0 taken off corderite schists exposed in wall of	CHIP	PEG	AD18209622		9.44694	0.01									59.1		1.6507					3.13797		360	0.289471	1239.16			65				816		0.01
MIRE	69269	Dorchap Peg	EL5315	523267	5957872	560		6.5	PEG		PEG		Subcropping PEG. Boulder scree downhill. Previous sampling here grab "ESK36" evident on site. Outcrop strikes approx at 320° GRID. (Sketch). Majority of outcrop is silica rich PEG, small interzones of 5-10mm plagioclase. Manganese staining on fracture	CHIP	PEG	AD18209622		8.362										25.6		0.811359					2.64818		60	0.0120613	929.368			77				766
MIRE	69270	Dorchap Peg	EL5315	523240	5957882	540		3	PEG		PEG		PEG subcropping downhill and along strike from 608876. Crystals 5-10cm, plagioclase-muscovite-qtz. Possible SN? Or Mn.	GRAB	PEG	AD18209622		8.07092					0.0500286					31.2		0.629503					3.76889		80	0.0482451	542.131			71				809		0.01
MIRE	69271	Dorchap Peg	EL5315	523132	5957749	576		4.7	PEG	PEG			Coarser grained PEG, Plagioclase (albite) 5-10mm crystals, silica groundmass and 5-10mm muscovite flakes. 'Core of PEG'. PEG crosses into ravine below forming a waterfall rockface. PEG outcrop not visible up other side due to scree slope and blackberrie	CHIP	PEG	AD18209622		8.52077	0.01									58.9		0.699447					3.51984		330	0.0180919	929.368			75				956
MIRE	69272	Dorchap Peg	EL5315	523127	5957748	576		4	PEG	PEG			Sediment-silca-PEG 'wall rock zone'. 3mm Qtz groundmass, albite, random 5-10mm crystals. Muscovite, FEOX surface staining	CHIP	PEG	AD18209622		7.99153	0.01									31.7		0.867315					2.64818		430	0.0301532	1084.26			78				772
SRE	69273	Dorchap Peg	EL006300	521614	5957293	644		3.6	PEG	PEG			This site originally seen from Camerons helicopter work, marked as BIG WHITE. PEG outcrop across blackberry covered gully creating a waterfall. Outcrop approx 35m long x 8m wide. Boundary not properly traced in GPX file due to density of undergrowth. Sm	CHIP	PEG	AD18209622		7.85922	0.01									16.3		0.629503					3.07986		30	0.0180919	697.026			20				395		0.01
SRE	69274	Dorchap Peg	EL006300	521614	5957289	642		4	PEG	PEG			Lower sample taken from waterfall PEG	CHIP	PEG	AD18209622		7.91215	0.02									16.8		0.692453					2.98854		30	0.0180919	1006.82			20				413		0.01
MIRE	69275	Dorchap Peg	EL5315	524925	5959248	893		2.5	PEG	PEG			Open adit at southerly end of PEG outcrop. Adit approx 100m long with blocked off side tunnel and winze. Good structural data available from this adit, PEG shows complexity of formation within host schist rock, controlled by joints/faults. Sample taken	CHIP	PEG	AD18209622		8.81185	0.01				0.0214408					31.8		0.258796					3.56965		40		387.237			29				813
MIRE	69276	Dorchap Peg	EL5315	524906	5959288	918		3.5	PEG	PEG			QTZ rich PEG boulder along strike of adit workings to the south. Outcrops are sinuous along this general strike up to top of hill. 5-15cm plagioclase (albite?), crystals rich on last 1m of outcrop on east side. (See sketch of adjacent outcrops) and GPX	CHIP	PEG	AD18209622		6.16565	0.01									42.6		0.398685					2.96364		70		154.895			37				722		0.01
MIRE	69277	Dorchap Peg	EL5315	523695	5957386	665		3	PEG	PEG			Sample taken across BOONES D5. Scree slope below is where HG lithium grab sample came from	CHIP	PEG	AD18209622		8.65308	0.01									29.2		0.321746					3.22099		720		154.895			70				955		0.01
MIRE	69278	Dorchap Peg	EL5315	524559	5958569	934	DORCHAP	1.5	PEG	PEG	PEG		quartz muscovite with minor feldspar	Chip		AD18242156		8.09738	0.01		6		0.271584					41.7		0.650486					2.69799		120	0.0783983	774.473			69		2500		767		0.01
SRE	69279	Dorchap Peg	EL006300	521488	5957789	803	DORCHAP	2	PEG	PEG	PEG		quartz feldspar muscovite	Chip		AD18242156		7.56814	0.01				0.0786164					16.4		0.972232					2.49045		70	0.0422144	1394.05			44		1200		413		0.01
MIRE	69280	Aplite	EL5315	524244	5959659	907	DORCHAP	3	APL	APL	APL		predominantly quartz and muscovite	Chip		AD18242156		8.52077	0.01		9		0.0786164					18.2		0.321746					0.87996		60	0.0180919	77.4473			70		1100		253
MIRE	69281	Dorchap Peg	EL5315	524408	5958222	943	DORCHAP	10	PEG	PEG	PEG		feldspar, quartz and muscovite	Chip		AD18242156		8.94417	0.01		33		0.0929102					46.8		0.286773					4.19226		130		232.342			69		1500		1100
MIRE	69282	Dorchap Peg	EL5315	524413	5958225	936	DORCHAP	2	PEG	PEG	PEG		contains petallite?	Chip		AD18242156		8.5737			42		0.200114					27.5		0.349724					2.43234		110		387.237			66		2100		663
MIRE	69283	Dorchap Peg	EL5315	524429	5958191	959	DORCHAP	2	APL	APL	PEG			Chip		AD18242156		8.75893	0.01		120		0.178674					34.1		0.356718					2.31612		110		154.895			110		2000		637		0.01
MIRE	69284	Dorchap Peg	E5315	524446	5958187	951	DORCHAP	3	PEG	PEG	PEG		large feldspars	Chip		AD18242156		7.88568	0.01		6		0.150086					27.3		0.489613					1.98406		150		154.895			96		1500		546		0.01
MIRE	69285	Dorchap Peg	EL5315	524427	5958171	942	DORCHAP	1	PEG	PEG	PEG		Abundant feldspar	Chip		AD18242156		8.25615			12		0.0214408					38		0.461635					2.93043		90		154.895			89		800		789
MIRE	69286	Aplite	EL5315	524415	5958181	938	DORCHAP	1	PEG	PEG	APL		Pegmatite and Aplites close to sediment contact	Chip		AD18242156		8.70601	0.01		163		0.178674					28.2		0.32874					0.888262		80		619.579			96		2100		328		0.01
SRE	69287	Aplite	EL006300	522402	5960308	568	DORCHAP	1	APL	APL	APL		quartz muscovite with rare feldspar	Chip		AD18242156		9.05001	0.01		103		0.121498					29.9		0.489613					1.86784		90	0.0422144	387.237			73		2200		625
SRE	69288	Dorchap Peg	EL006300	522398	5960348	556	DORCHAP	2	PEG	PEG	SA		Muscovite Quartz Feldspar	Chip		AD18242156		7.5946	0.01		210		0.228702					48.7		0.650486					3.51154		130	0.0603064	387.237			70		1700		714		0.01
SRE	69289	Dorchap Peg	EL006300	522426	5960344	558	DORCHAP	1	PEG	PEG	PEG		Pink "flaky" feldspar- Petallite? Muscovite and Quartz	Chip		AD18242156		8.33554	0.01		14		0.150086					16.5		0.559558					1.95086		80	0.0120613	697.026			301		2400		398
SRE	69290	Dorchap Peg	EL006300	522798	5957838	552	DORCHAP	60	PEG	PEG	PEG		quartz muscovite, k-feldspar and plagiolcase with tourmaline, potentially actinolite	Chip		AD18242156		7.5946	0.01		23		0.0929102					27.1		0.657481					2.68139		130	0.0120613	851.921			66		2200		684
SRE	69291	Dorchap Peg	EL006300	522777	5957852	542	DORCHAP	60	PEG	PEG	PEG		quartz feldspar muscovite	Chip		AD18242156		8.44139	0.01		26		0.0571755					51.5		0.720431					3.79379		150	0.0120613	851.921			79		2100		1115
SRE	69292	Dorchap Peg	EL006300	522818	5957828	569	DORCHAP	60	PEG	PEG	PEG		an increase in feldspar, maybe Petalite	Chip		AD18242156		9.79095	0.01		10		0.0500286					129		0.342729					9.3392		50		154.895			25		3300		2050
SRE	69293	Dorchap Peg	EL006300	522898	5957548	699	DORCHAP	3	PEG		PEG		Major muscovite, minor qtz & petalite	Chip		AD18242156		8.09738	0.02		5		0.0571755					20		0.496608					2.39084		70	0.0120613	309.789			81		1000		578
SRE	69294	Dorchap Peg	EL006300	519059	5955743	556	DORCHAP	10	PEG	PEG			zoned pegmatite with tourmaline, qtz, muscovite, fspar to 25mm	Chip		AD18242156		7.99153	0.01				0.100057					11.2		0.811359					2.7395		80	0.0904595	309.789			23		500		246
SRE	69295	Dorchap Peg	EL006300	519159	5955624	572	DORCHAP	3	PEG	PEG			zoned pegmatite with tourmaline, qtz, muscovite, fspar to 70mm, mixed sample some very muscovite poor all feldspar quartz, some fine grained aplite, sample is a bit of everything	Chip		AD18242156		10.0556					0.142939					118.5		0.839337					3.77719		120	0.0904595	1471.5			26		1000		1415
SRE	69296	Dorchap Peg	EL006300	519458	5955383	642	DORCHAP	3	GRN_M	GRN_M			tourmaline altered granite, slight greisenisation	Chip		AD18242156		8.54723	0.01				0.328759					18		0.818354					4.24207		70	0.102521	309.789			10		1500		397		0.12
SRE	69297	Dorchap Peg	EL006300	519437	5955281	652	DORCHAP	20	PEG	PEG			pegmatite, minor tourmaline large feldspars > 30mm	Chip		AD18242156		8.73247	0.01				0.0929102					51.6		0.608519					5.71144		70	0.0723676	232.342			17		1600		617
SRE	69298	Dorchap Peg	EL006300	519443	5955304	649	DORCHAP	20	PEG	PEG			coarse feldspar, quartz, minor muscovite, tourmaline	Chip		AD18242156		7.70045	0.01		20		0.100057					19.5		0.622508					3.24589		50	0.0603064	929.368			23		1300		371
MIRE	69299	Aplite	EL5315	523744	5953851	574	DORCHAP		APL	APL			Fine grained aplite with mm cassiterite	Grab		AD18242156		7.98	5.7	10	138	0.07	0.09		0.43	0.1	1	132.5	1.1	0.27	45.2	0.18	3		2.18		150		103	0.06	2.98	102	0.6	1060	12.2	1285			0.09
MIRE	69300	Dorchap Peg	EL5315	523707	5953090	688	DORCHAP		PEG	PEG			qtzy, fspar, very weathered with iron oxides	Grab		AD18242156		8.99709	0.01		87		0.0428816					57.7		0.412674					3.80209		3450	0.0120613	774.473			51		600		1135
MIRE	69301	Dorchap Peg	EL5315	523718	5953080	691	DORCHAP		PEG	PEG			qtzy, fspar, very weathered with iron oxides	Grab		AD18242156	0.04	7.53	11.3	30	156.5	0.88	0.01	0.05	0.56	3.6	5	48.9	1.3	0.61	16.65	0.23	1		2.34		4890	0.02	1040	0.31	2.71	98.1	3.4	410	15.9	777			0.12
MIRE	69302	Dorchap Peg	EL5315	523856	5952820	667	DORCHAP		PEG	PEG			fine qtz, fspar, weathered	Grab		AD18242156		8.67954	0.01		17		0.0214408					59.8		0.370707					2.42404		1890		154.895			83		500		1020
MIRE	69303	Dorchap Peg	EL5315	523860	5952822	671	DORCHAP		PEG	PEG			fine grained aplitic specimen	Grab		AD18242156		8.70601			56		0.0428816					58.3		0.342729					2.7395		300		77.4473			87		1800		1045		0.01
SRE	69304	Dorchap Peg	EL006300	520709	5957582	0	DORCHAP	5	PEG	PEG			Dominantly quartz and feldspar, minor muscovite, common tourmaline	Chip		AD18242156		8.62662					0.0786164					13		0.867315					3.55305		60	0.0180919	1626.39			13		1500		372
SRE	69305	Dorchap Peg	EL006300	520708	5957513	0	DORCHAP	3	PEG	PEG			Quartz, feldspar, muscovite	Chip		AD18242156		9.26171	0.02		6		0.107204					18.1		0.832342					3.17948		60	0.0723676	1239.16			20		1500		395
SRE	69306	Dorchap Peg	EL006300	520711	5957387	0	DORCHAP	15	PEG	PEG			Quartz, feldspar, muscovite, minor tourmaline	Chip		AD18242156		8.04446	0.02				0.150086					13.5		0.790376					2.67309		70	0.0301532	1471.5			17		1200		262
SRE	69307	Dorchap Peg	EL006300	520709	5957471	0	DORCHAP	25	PEG	PEG			Quartz, feldspar, muscovite	Chip		AD18242156		8.09738	0.01				0.0786164					28		0.587536					5.23825		70	0.0180919	464.684			13		1500		506
SRE	69308	Dorchap Peg	EL006300	520638	5956928	0	DORCHAP	2	PEG	PEG			Quartz, feldspar, plumose muscovite, minor tourmaline	Chip		AD18242156		7.83276	0.01				0.0786164					12.9		0.783381					3.74398		60	0.0422144	232.342			29		1100		374		0.01
SRE	69309	Dorchap Peg	EL006300	519266	5955646	539	DORCHAP	20	PEG	PEG			Muscovite, Quartz, Feldspar, minor tourmaline	Grab		AD18242156		7.72691					0.150086					13.4		0.650486					3.76058		60	0.0301532	232.342			15		900		298		0.08
SRE	69310	Dorchap Peg	EL006300	519230	5955614	546	DORCHAP	5	PEG	PEG			Muscovite, quartz, feldspar	Chip		AD18242156		6.98598	0.01		5		0.121498					17.1		0.699447					2.7229		80	0.0603064	697.026			17		1100		313
SRE	69311	Dorchap Peg	EL006300	519198	5955619	568	DORCHAP	6	PEG	PEG			Muscovite. Quartz, Feldspar, minor tourmaline	Grab		AD18242156		7.0389	0.01				0.100057					18.1		0.643492					4.88129		60	0.0603064	1006.82			11		1400		449
MIRE	69312	Dorchap Peg	EL5315	523974	5959985	742	DORCHAP	2	PEG	PEG			Quartz, feldspar, muscovite	Grab		AD18242156		8.81185	0.01		34		0.192967					31.4		0.349724					2.47385		130	0.0120613	232.342			57		2100		659		0.02
SRE	69313	Dorchap Peg	EL006300	523943	5960016	717	DORCHAP	7	PEG	PEG			Quartz, feldspar, muscovite, chloritised muscovite	Grab		AD18242156		8.41492			39		0.107204					30.7		0.440652					2.7478		700	0.0120613	387.237			86		1900		653
SRE	69314	Dorchap Peg	EL006300	523016	5962146	629	DORCHAP	10	PEG	PEG			Quartz, feldspar, muscovite, possible petalite	Grab		AD18242156		8.25615	0.01		5		0.0214408					118		0.440652					5.81106		140	0.0301532	542.131			52		1900		2260
SRE	69315	Dorchap Peg	EL006300	523055	5962136	657	DORCHAP	3	PEG	PEG			Quartz, feldspar, muscovite, possible petalite	Grab		AD18242156		8.362			5		0.121498					71.4		0.566552					3.66927		140	0.0301532	1006.82			70		2800		1410
SRE	69316	Dorchap Peg	EL006300	523152	5962000	699	DORCHAP	7	PEG	PEG			Quartz, feldspar, muscovite	Grab		AD18242156		9.47341	0.01		8		0.128645					53.4		0.321746					1.95916		50	0.0301532	309.789			76		2500		681
SRE	69317	Dorchap Peg	EL006300	522050	5953356	837	DORCHAP	3	PEG	PEG			Quartz, Fledspar, Muscovite	Chip		AD18242156		8.70601	0.02				0.0428816					25.5		0.748409					3.58625		60	0.0422144	542.131			75		2000		792
MIRE	69318	Dorchap Peg	EL5315	521787	5952972	776	DORCHAP	2	PEG	PEG			Quartz, Fledspar, Muscovite	Chip		AD18242156		8.1503	0.01		26		0.0500286					29.2		0.769392					3.37041		150	0.0120613	774.473			52		2000		768
SRE	69319	Dorchap Peg	EL006300	521414	5953086	754	DORCHAP	4	PEG	PEG			Quartz, Fledspar, Muscovite	Grab		AD18242156		6.88013	0.02		5		0.100057					22.2		0.769392					2.68139		520	0.0422144	1006.82			62		4400		638
SRE	69320	Dorchap Peg	EL006300	521759	5953115	742	DORCHAP	8	PEG	PEG			Quartz, Fledspar, Muscovite	Chip		AD18242156		8.44139	0.01		81		0.25729					27.8		0.510597					3.55305		200	0.0482451	309.789			54		2800		534
MIRE	69321	Dorchap Peg	EL5315	524669	5950366	988	DORCHAP		PEG	PEG			highly weathered just quartz and muscovite visible	Grab		AD18254372	0.08	7.24	50	50	48.7	0.25	0.19	0.15	1.18	0.8	5	30.4	3	0.68	14.25	0.05	0.8		2.11	0.6	306	0.06	337	0.25	3.69	43.2	1.1	1150	18.7	430		0.01	0.15
SRE	69322	Dorchap Peg	EL006300	518809	5955464	0	DORCHAP	20	PEG	PEG			Large dome, apx 50-60 m wide, and at least 40m long. Two samples collected 69322 from east side, 69323 from west side. Dominantly comprised of mediumgrained pegmatitie (5-15 mm diameter), although there are 200mm wide zones of 30mm diamter crystals. Thes	Grab		AD18254372	0.08	6.8	4.8	10	1.48	1.53	0.17	0.08	2.13	0.2	3	11.55	2.5	0.48	13.7	0.05	0.6	0.012	3.38	1	24.1	0.04	473	0.99	2.84	8.3	0.7	970	22.3	301			0.08
SRE	69323	Dorchap Peg	EL006300	518787	5955458	0	DORCHAP	20	PEG	PEG			Large dome, apx 50-60 m wide, and at least 40m long. Two samples collected 69322 from east side, 69323 from west side. Dominantly comprised of mediumgrained pegmatitie (5-15 mm diameter), although there are 200mm wide zones of 30mm diamter crystals. Thes	Chip		AD18254372	0.08	6.8	6.9	10	1.59	1.3	0.14	0.13	2.29	0.1	3	13.7	3	0.58	15.25	0.07	1.1	0.022	3.31	1	35.5	0.03	709	0.19	2.81	14.6	0.3	1010	20.4	333			0.06
SRE	69324	Dorchap Peg	EL006300	518845	5955248	0	DORCHAP	9	PEG	PEG			Common tourmaline, muscovite, quartz, feldspar. Dyke comprised of a mix of coarse grained crystals (20-25 mm) and fine grained crystals (3-5mm). Zones of larger crystals are comprised dominantly of quartz, some muscovite.	Chip		AD18254372	0.08	6.76	8.7	20	1.39	0.5	0.14	0.06	1.68	0.3	3	6.81	2.8	0.43	13.65	0.07	0.7	0.013	2.76	0.8	13.4	0.02	191	0.18	3.23	8.5	1.3	980	17.2	252			0.08
SRE	69325	Dorchap Peg	EL006300	518859	5955215	0	DORCHAP	16	PEG	PEG			Good sediment contact 331/NE/78. Dominantly fine grained (3-15 mm) with a few intervals of coarser grained material (crystals 20-30mm) up to 300mm thick. Abundant tourmaline, common muscovite, quartz, feldspar.	Chip		AD18254372	0.06	7.06	24.3	20	1.48	0.59	0.1	0.03	1.62	0.2	3	10.25	3.1	0.57	15.45	0.06	0.5	0.021	4.12	0.8	22.9	0.03	205	0.18	2.48	12.7	0.8	1040	21.1	380			0.07
SRE	69326	Dorchap Peg	EL5315	523790	5953831	552	DORCHAP		PEG_SN			PEG_SN	med grained qtz, musc, fspar pegmatite	Grab		AD18242156		8.44139			242		0.0214408					158		0.447646					2.86402		170	0.0301532	309.789			279		800		1705
MIRE	69327	Dorchap Peg	EL5315	523887	5952556	713	DORCHAP		PEG	PEG			Very coarse petalite with finer quartz and minor muscovite, sample is mostly >30 mm petalite with some adjoining aplite	Grab		AD18254372	0.05	7.97	1.1	10	6.65	0.22	0.02		0.18	0.7	2	90.7	1.4	0.23	14.35	0.08	0.4		4.61		86.2		196	0.13	2.3	25.5	0.7	1640	37.3	950			0.1
MIRE	69328	Dorchap Peg	EL5315	523888	5952558	713	DORCHAP		PEG	PEG			From within 1m of 69327 but the finer aplite mostly in sample some medium petalite	Grab		AD18254372	0.05	7.8	1.1	10	16	0.34	0.06		0.63	0.4	3	53.5	1	0.33	17.2	0.05	2.2		2.6		122.5		130	0.15	3.91	66.2	0.8	1120	12.3	600			0.11
MIRE	69329	Dorchap Peg	EL5315	523901	5952545	710	DORCHAP		PEG	PEG			>30 mm grained petalite with qtz and minor muscovite	Grab		AD18254372	0.05	8.63	0.6	10	6.51	0.04	0.03	0.15	0.09	0.1	3	205	1	0.24	15.9	0.08	0.5		4.82		167		119	0.12	1.77	23.8	0.6	2690	33.4	1390			0.14
MIRE	69330	Dorchap Peg	EL5315	523903	5952542	711	DORCHAP		PEG	PEG			>30mm petalite with quartz and minor muscovite	Grab		AD18254372	0.04	8.09	5.4	20	8.29	0.25	0.03	0.05	0.29	0.2	3	118	0.9	0.41	14.7	0.09	0.6		5.25		620		425	0.18	2.36	32.1	0.5	1850	21.5	1670			0.11
MIRE	69331	Dorchap Peg	EL5315	523896	5952543	709	DORCHAP		PEG			PEG	>70 mm petalite, minor quartz and muscovite	Grab		AD18254372	0.03	8.71	1.6	20	12.5	0.1	0.04	0.08	0.36	0.2	3	181	1.3	0.26	16.85	0.05	1.1		5.73		147		181	0.13	2.56	57.3	0.8	2780	32.2	1820			0.08
MIRE	69332	Dorchap Peg	EL5315	523898	5952540	709	DORCHAP		PEG	PEG			>30mm petalite in minor aplite component	Grab		AD18254372	0.06	8.75	0.3	10	26.1	0.15	0.02	0.05	0.08	0.2	4	425	0.8	0.33	16.9	0.07	0.2		5.03		264		124	0.17	1.42	12.3	0.5	2590	59.9	1810			0.13
MIRE	69333	Dorchap Peg	EL5315	523907	5952522	702	DORCHAP		PEG	PEG			medium grained petalite in dominantly aplitic rock with qtz, muscovite	Grab		AD18254372	0.08	7.72	1	20	114.5	0.29	0.07	0.08	0.43	0.1	3	114.5	1	0.24	19.7	0.08	1		2.65		116		154	0.13	4.48	71.8	0.6	1400	23.6	1010			0.07
MIRE	69334	Dorchap Peg	EL5315	523854	5952607	709	DORCHAP		PEG	PEG			from workings coarse petalite in predominantly fine grained aplite sample	Grab		AD18254372	0.01	7.73	11.3	10	5.52	0.07	0.01		1.06	0.5	4	84.8	1.8	0.56	31.2	0.1	0.3		5.03	1	166.5		133	0.27	0.84	96.3	1.2	700	14	1810			0.08
MIRE	69335	Dorchap Peg	EL5315	524713	5959197	861	DORCHAP	10	PEG	PEG			3x1.2m outcrop. Dominantly quartz. Minor muscovite. Feldspars appear weathered. Some pink coloured feldspar - either oxidation/weathering or K-feldspar? Homogenous, fine grained ~2 mm diameter. Dominantly white coloured with flecks of yellow from weather	Grab		AD18254372	0.03	7.97	2.3	20	5.98	0.99	0.06		0.68	0.3	3	109.5	2.1	0.37	26.9	0.07	2		3.35	0.5	53.5	0.01	220	0.12	3.11	80.5	1	1270	20.4	990			0.1
SRE	69336	Dorchap Peg	EL006300	518876	5955091	0	DORCHAP	11	PEG	PEG			Dominantly fine to medium grained (3-15 mm), with intervals up to 30 cm wide comprised of crystals up to 30 cm long. Abundnant tourmaline, muscoviye, quartz, feldspar. Dike trends ~348deg	Grab		AD18254372	0.05	6.96	17.6	30	0.79	0.65	0.17	0.02	3.17	0.3	4	5.78	2	0.6	12.65	0.08	0.3	0.013	3.42	1.5	11.1	0.05	124	0.17	2.89	6	0.9	720	27.2	224			0.2
SRE	69337	Dorchap Peg	EL006300	518787	5954958	0	DORCHAP	20	PEG	PEG			Dominantly fien to medium grained. Common muscovite, common tourmaline, quartz, feldspar. Plomose muscovite appears reltively common at this locality	Grab		AD18254372	0.06	7.22	1.7	10	1.66	1.24	0.18	0.08	2.47	0.3	3	16.65	2.2	0.51	16.15	0.08	0.9	0.02	3.09	1.2	38	0.03	532	0.13	2.9	10.8	0.8	920	23.9	281			0.07
SRE	69338	Dorchap Peg	EL006300	518796	5954939	0	DORCHAP	11	PEG	PEG			Dominantly fien to medium grained. Common muscovite, common tourmaline, quartz, feldspar. Plomose muscovite appears reltively common at this locality	Grab		AD18254372	0.03	7.43	8.6	30	1.99	1.19	0.1	0.13	1.67	0.5	3	11.9	1.5	0.68	17.55	0.07	1	0.029	3.63	0.8	27.1	0.03	1240	0.14	2.46	15.1	0.8	790	19.6	352			0.06
MIRE	69339	Dorchap Peg	EL5315	519667	5952951	661	DORCHAP		PEG_GRAN	PEG_GRAN			fine grained highly weathered aplitic looking qtz, musc, fspar	Grab		AD18254372	0.03	7.03	2.2	10	2.36	1.07	0.11	0.23	2.93	0.4	5	15.1	1.7	1.06	15.95	0.07	1.2	0.016	1.97	1.2	33.6	0.02	1930	0.21	3.6	22.4	1.3	780	11.4	246			0.08
SRE	69340	Dorchap Peg	EL006300	520152	5953663	704	DORCHAP		PEG_GRAN	PEG_GRAN			fine grained highly weathered aplitic looking qtz, musc, fspar	Grab		AD18254372	0.03	7.75	18.3	10	3.82	1.11	0.12	0.12	1.91	0.3	4	24	2.4	0.62	16.6	0.06	1.1	0.006	3.2	0.8	26.2	0.02	803	0.17	3.65	15.4	0.9	1250	14.2	392			0.08
SRE	69341	Dorchap Peg	EL006300	524165	5960006	878	DORCHAP		PEG	PEG			muscovite, albite, qtz	Grab		AD18254372	0.03	7.68	9.3	20	3.28	0.78	0.08		0.39	0.3	3	74.4	1.2	0.35	21.1	0.08	1.2		5.16		31.6	0.01	151	0.42	2.3	53	1.7	1710	22.5	1540			0.12
SRE	69342	Dorchap Peg	EL006300	520071	5953585	762	DORCHAP		PEG_GRAN	PEG_GRAN			fine grained highly weathered aplitic looking qtz, musc, fspar	Grab		AD18254372	0.03	7.29	4.2	10	3.93	0.95	0.04	0.1	0.91	0.5	4	15.5	3	0.52	16.2	0.07	0.6	0.021	3.6		15.3	0.01	963	0.2	3.2	20.5	0.9	1580	14.7	480			0.06
MIRE	69343	Dorchap Peg	EL5315	524193	5959603	903	DORCHAP		PEG	PEG			weathered albite, muscovite, qtz	Grab		AD18254372	0.01	7.84	7.8	20	6.08	0.35	0.07		2.4	0.9	4	27.5	1.2	0.42	22.1	0.06	1.4		1.65	2.1	32.7	0.02	151	0.13	4.18	64.8	2.8	1150	23	411			0.09
SRE	69344	Dorchap Peg	EL006300	518736	5955941	0	DORCHAP	1	PEG	PEG			Sample collected from 2m below the surface in old mine workings. Very soft altered pegmatite. Possible petalite ?Orange brown to red brown colour. Very micaceous. Abundant muscovite upto 40mm, common quartz, Feldspars tend to be quite weathered. Average	Grab		AD18254372	0.01	8.59	5.3	170	2.33	3.11	0.02		3.16	1.2	3	19.1	3.3	0.41	15.4	0.08	1.4	0.009	4.88	2.2	15.5	0.02	51	0.15	1.16	9.4	2.1	1170	40.1	422			0.06
MIRE	69345	Dorchap Peg	EL5315	524220	5949139	1125	DORCHAP		PEG	PEG			weathered albite, muscovite, qtz	Grab		AD18254372	0.03	7.85	40.3	260	16.15	0.56	0.31	0.03	3.22	2.3	4	27.4	1.3	0.56	23.2	0.07	3.3	0.007	2.17	1.6	110.5	0.03	519	0.15	3.17	46.4	5.3	3480	16.3	480			0.08
MIRE	69346	Dorchap Peg	EL5315	524176	5949170	1131	DORCHAP		PEG	PEG			weathered albite, muscovite, qtz, possible petalite	Grab		AD18254372	0.01	6.74	40.6	90	54.8	0.46	0.01		1.66	0.3	6	50.5	0.9	0.5	15.85	0.08	1.2		5.28	0.8	141	0.03	97	0.2	0.6	64.8	1.8	1080	25.5	1100			0.08
MIRE	69347	Dorchap Peg	EL5315	524089	5949211	1120	DORCHAP		PEG	PEG			weathered albite, muscovite, qtz	Grab		AD18254372	0.01	7.72	11	50	10.5	0.05	0.16		1.57	0.7	3	56.7	0.8	0.33	18.3	0.14	2.1		4.73	0.7	97.7	0.01	388	0.12	3.04	45.1	1.3	1880	23.7	1110			0.06
MIRE	69348	Dorchap Peg	EL5315	524829	5959178	837	DORCHAP	2	PEG			PEG	Slumped mass of pegmatite, approx 6x2m long. Crystals upto 5 cm long, although more typically 1-1.5 cm diameter. Comprised of quartz feldspar and muscovite	Grab		AD18254372	0.02	7.72	1.6	20	91.7	0.11	0.15		0.43	0.2	3	56.2	0.7	0.37	15.55	0.05	0.9		5		81.1		619	0.12	2.76	65.3	0.9	2260	51.3	1060			0.15
MIRE	69349	Dorchap Peg	EL5315	525132	5958960	740	DORCHAP	3	PEG	PEG			Almost pure quartz. Common possible cassiderite in vugs and crystals up to 3.5 cm.	Grab		AD18254372	0.02	0.67	22.7	60	0.48	0.08	0.02	0.02	7.55	1.8	10	1.21	8.1	0.67	2.4	0.06	0.2	0.005	0.29	6.4	12.3	0.06	80	0.31	0.02	1.5	4.3	150	2.1	28.9			2.02
MIRE	69350	Dorchap Peg	EL5315	525693	5958774	607	DORCHAP	4	PEG	PEG			69350 and 69451 are from the same outcrop. Outcrop has two promenent points. Sample 69350 is from the uphill, northwestern point and sample 69451 is from the downhill southeastern point. Outcrop strikes at 310 deg and is 4m wide and 15 m long. Sample 693	Grab		AD18254372	0.01	7.36	9.8	30	3.91	0.13	0.11		0.59	0.3	4	46.8	1.4	0.58	20.3	0.06	1.4		3.02		62.2	0.01	447	0.17	3.29	64.7	0.9	1790	21.7	790			0.08
MIRE	69351	Dorchap Peg	EL5315	525683	5958766	602	DORCHAP	4	PEG	PEG			69350 and 69451 are from the same outcrop. Outcrop has two promenent points. Sample 69350 is from the uphill, northwestern point and sample 69451 is from the downhill southeastern point. Outcrop strikes at 310 deg and is 4m wide and 15 m long. Sample 694	Grab		AD18254372	0.06	7.74	4.8	20	3.98	0.66	0.1	0.03	0.48	0.5	3	50.8	3	0.44	19.35	0.06	0.6		3.92		56.3	0.01	271	0.14	3.3	41.1	1.8	1550	24.3	980			0.11
MIRE	69352	Dorchap Peg	EL5315	525773	5958770	598	DORCHAP	7	PEG	PEG			Large dyke - approx 30x15m. Strike 328 deg. Samples 69452 and 69453 from the either end of the outcrop. Sample 69452 from the northwest side and 69453 from the southeast side. Sample 69452 grainsize is dominantly 5-20 mm, comprised of feldspar, quartz a	Grab		AD18254372	0.03	6.59	15.4	40	3.04	1.74	0.14	0.72	1.77	0.8	5	34.5	1.9	0.88	20.5	0.05	1.1		2.73	1	75.4	0.02	1500	0.27	2.3	65.1	3.2	1620	11	780			0.12
MIRE	69353	Dorchap Peg	EL5315	525784	5958761	591	DORCHAP	8	PEG	PEG			Large dyke - approx 30x15m. Strike 328 deg. Samples 69452 and 69453 from the either end of the outcrop. Sample 69452 from the northwest side and 69453 from the southeast side. Sample 69453 dominantly fine-grained 2-3 mm diameter although some feldspars r	Grab		AD18254372	0.04	6.75	20.1	60	3.54	5.59	0.12	0.16	2.74	0.4	4	47.6	1.3	0.55	20.5	0.05	2.2		2.69	1.4	127.5	0.03	955	0.11	2.78	59.8	0.7	2010	11.4	840			0.18
MIRE	69354	Dorchap Peg	EL5315	524598	5958708	903	DORCHAP	1.5	PEG	PEG			Approximately 1.5x7 m. Striking 330deg. Ranges from a fine grained aplitic texture to 1cm diameter crystals. Occasional crystals to 4cm. Contains Quartz, feldspar and muscovite. Possible petalite. Pervasive weathering. Some unknown green mineralisation.	Grab		AD18254372	0.04	7.43	25.7	20	4.91	1.49	0.16	0.19	0.57	0.2	5	51.6	1.3	0.78	24.8	0.05	1		3.31		43.7	0.01	739	0.22	2.87	41.3	0.9	2160	9.7	890			0.14
MCRE	69355	Dorchap Peg	EL006486	523292	5948652	1133	DORCHAP	10	PEG	PEG			lowermost, southern face of major outcrop. Variable grainsize from 2-100 mm diameter. Dominantly between 3 and 20mm. Common muscoviye, quartz, feldspar. Some plumerose muscovite. Striking ~330deg. Sediment contact 346/NE/76	Grab		AD18254372	0.04	7.33	3.3	30	61.6	0.47	0.27		0.93	0.6	5	28.9	1	0.43	17.45	0.05	0.7		2.66	0.6	246	0.01	690	0.15	3.16	52	2.2	1980	15.7	580			0.09
MCRE	69356	Dorchap Peg	EL006486	523313	5948662	1137	DORCHAP	20	PEG	PEG			Northern major face of lower outcrop near workings. Variable grainsize, feldspars up to 30 cm long. Crystal size ranges from 2-300mm, typically around 20 mm. Contains muscovite, quartz, feldspar. Possible petalite, but likely weathered feldspar.	Grab		AD18254372	0.04	7.55	23.1	10	3.49	0.69	0.15	0.84	1.55	0.2	3	45.2	1	0.6	24.8	0.06	1.2	0.007	3.5	0.7	50.8	0.01	747	0.12	2.81	41.3	0.3	2180	8.2	960			0.16
MCRE	69357	Dorchap Peg	EL006486	523319	5948656	1143	DORCHAP	9	PEG	PEG			Dominantly 1-2cm diameter crystals. Quartz, felspar and muscovite present	Grab		AD18254372	0.05	7.14	49.5	10	3.51	1.88	0.07	0.66	0.45	0.2	6	48	1.3	0.66	20.4	0.07	0.6	0.026	3.22		36.7	0.01	669	0.17	3.13	24.9	2	2170	9.9	870			0.17
MCRE	69358	Dorchap Peg	EL006486	523325	5948650	1147	DORCHAP	5	PEG	PEG			Variable grainsize from 2-150mm, typically 1-2cm diameter or 2-3 mm (bimodal distribution). Contains quartz, feldspar and muscovite. Quartz and feldspar occur as isolated crystals up to 20 cm long within the groundmass	Grab		AD18254372	0.04	7.1	32.7	20	3.76	0.72	0.08	1.55	0.49	0.2	4	49	1.2	0.63	22.9	0.07	0.6	0.007	3.76		44.2	0.01	933	0.13	2.44	34.8	0.3	2240	11.2	990			0.11
SRE	69359	Dorchap Peg	EL006300	521829	5959814	435	DORCHAP	5	PEG	PEG			7x5 m dyke. Crystals 3mm to 40mm diameter. Commonly 10 mm diameter. Muscovite, quartz, feldspar. Pervasively weathered.	Grab		AD18254372	0.07	7.72	26.2	30	143	0.72	0.11	0.21	1.25	0.6	3	25.9	1.2	0.47	22.7	0.09	2.1	0.016	2.73	1.4	51.5	0.01	289	0.13	3.68	25.5	1.5	1920	13	700			0.15
SRE	69360	Dorchap Peg	EL006300	521294	5959973	475	DORCHAP	1	PEG		PEG		Subcropping pegmatite. 7x1m. Typically 10mm crystals, ranging up to 150 mm. Pervasive weathering. Muscovite, quartz, feldspar, tourmaline, minor plumerose muscovite.	Grab		AD18254372	0.06	7.53	64.5	40	107.5	1.21	0.06	0.31	0.88	0.6	4	32.2	1	0.86	24.4	0.08	1	0.007	3.83	0.5	68.5	0.01	729	0.2	2.46	27.4	1.1	2320	15.1	920			0.14
SRE	69361	Dorchap Peg	EL006300	521850	5959806	429	DORCHAP	10	PEG	PEG			Grainsze commonly 1-2cm diameter. Some quartz and feldspar crystals up to 5 cm. Muscovite, abundant quartz, feldspar. Moderately to well weathered.	Grab		AD18254372	0.05	7.22	14.2	10	37.9	1.19	0.08		2.5	0.4	3	16.65	3.2	0.51	20.8	0.08	0.8	0.015	2.72	1.3	11.6	0.02	611	0.12	3.24	35.9	0.7	2120	12.2	367			0.07
SRE	69362	Dorchap Peg	EL006300	523004	5960032	598	DORCHAP	1.5	PEG	PEG			4.5x1.5m dyke. Dominantly aplitic but contains a 1 m wide vein of pegmatite, with feldspar and muscovite up to 30 mm. Very pale white groundmass in fresh faces.	Grab		AD18254372		7.61	1.8	20	125	0.1	0.05		0.51	0.3	3	36.8	0.6	0.41	23.8	0.06	1.6		2.93		272	0.01	170	0.15	2.67	87.1	2.6	620	14.8	700			0.05
SRE	69363	Dorchap Peg	EL006300	522992	5960042	590	DORCHAP	4	PEG	PEG			8x4m dyke. Dominantly aplite. 1-3 mm crystals. 50 cm thick veins of pegmatite with feldspar and muscovite up to 30 mm diameter. Cnatins feldspar, quartz, muscovite	Grab		AD18254372	0.08	7.45	11.8	80	89.6	0.64	0.16		1.47	0.3	3	26.4	1.8	0.33	22.3	0.06	2	0.005	2.32	0.7	182.5	0.03	132	0.16	4.13	74.5	1	1170	18.6	570	0.002		0.09
SRE	69364	Dorchap Peg	EL006300	523041	5960014	621	DORCHAP	1.5	PEG	PEG			4x1.5m dyke. Dominantly fine grained but with 50 cm veins of pegmatite upto 30mm. Muscovite, quartz, feldspar. Upper part of dyke is pegmatite, 1-3 cm grainsize with abundnant muscovite.	Grab		AD18254372		7.83	3.1	40	69.9	0.41	0.25	0.23	1.4	0.6	3	22.7	2.1	0.41	24.5	0.06	1.7		1.84	0.7	47.3	0.02	485	0.12	3.88	84.9	1	2210	23.6	450			0.07
MIRE	69365	Dorchap Peg	EL5315	523016	5959997	618	DORCHAP	5	PEG	PEG			5x10m long dyke. Sediment contact 320/SW/67 on south side of dyke. Aplitic to fine grained. 2-3 mm diameter quartz, feldspar and muscovite. Occasional quartz and feldspar to 15mm	Grab		AD18254372	0.02	7.87	6.8	80	76.1	0.91	0.17		5.09	0.4	7	17.15	1.2	0.44	20.9	0.07	1.6	0.008	2.02	2.5	88.1	0.06	239	0.11	4.17	70.9	1.9	1430	16.3	421			0.07
MIRE	69366	Dorchap Peg	EL5315	523036	5959996	627	DORCHAP	6	PEG	PEG			6x14 m dyke. Sediment contact on north side 315/SW/78. Fine grained, dominantly 3-5 mm, with 30 cm thick veins of pegmatite up to 15 mm and some intervals of quartz and feldspar to 30 mm. Muscovite, feldspar and quartz.	Grab		AD18254372	0.01	7.69	0.9	20	65.6	0.5	0.18	0.61	1.31	0.3	4	18.4	0.5	0.44	21.9	0.07	1.4		2.26	0.6	61.6	0.01	530	0.14	4.18	69.9	0.5	2140	16.9	490			0.07
SRE	69367	Dorchap Peg	EL006300	522981	5959993	619	DORCHAP	5	PEG	PEG			5x11m dyke. Sediment contacts on both sides 325/SW/60. Flow structures within dyke. Variable grainsize from 3-40mm. Tyoically 10-15mm. Rafted block of sediment in middle of dyke. Quartz, feldspar, muscovite.	Grab		AD18254372	0.03	7.9	59.9	80	9.2	0.89	0.29	0.09	2.42	1.4	3	19.05	2.7	0.48	25.6	0.07	1.4	0.014	2.09	1.2	58.9	0.03	571	0.12	4.03	53	2	2730	17.6	393			0.08
SRE	69368	Dorchap Peg	EL006300	522792	5960363	530	DORCHAP	6	PEG	PEG			6x8m dyke. Varibale grainsize 2-40mm, typicallt 2-5 mm. Quartz, muscovite, fledspar. Moderately well weathered. Dyke appears to continue 10m down stream where there is another 4x4 outcrop on a similar strike	Grab		AD18254372	0.04	8.13	21.9	40	30.2	0.49	0.1	0.38	1.79	1	3	27.7	1.4	0.68	26.7	0.09	1.3	0.02	2.86	1.1	183	0.02	1010	0.15	3.53	61.4	0.9	2220	12.7	570			0.09
SRE	69369	Dorchap Peg	EL006300	522836	5960447	491	DORCHAP	5	PEG	PEG			8x5m dyke. Another 4x1m dyke 6m along strike. Striking 328deg. Crystals from 3mm to 40mm. Typically 10-20 mm. Muscovite, quartz, feldspar. 20 cm thick quartz veins present.	Grab		AD18254372	0.04	7.78	31.9	20	5.36	0.94	0.06		1.14	0.7	2	23.4	1.9	0.48	21.9	0.07	1	0.007	2.96	0.6	40.6	0.01	575	0.1	3.51	33.7	1.2	1270	12.1	520			0.08
SRE	69370	Dorchap Peg	EL006300	522646	5960707	476	DORCHAP	4	PEG	PEG			1x18m dyke. Striking 327. 10-40mm size crystals. Some finegrained 2-3mm sized crystal on edge of dyke. Quartz, feldspar. Minor muscovite.	Grab		AD18254372	0.04	7.86	13.3	30	47	0.52	0.1	0.16	1.09	0.6	3	25.6	4.1	0.51	20.3	0.06	1		2.74	0.5	51.4	0.01	478	0.69	4.11	62.5	4.3	1770	24.4	530			0.09
SRE	69371	Dorchap Peg	EL006300	522614	5960660	478	DORCHAP	1	PEG	PEG			13-4m dyke. 3-20mm crystals. Occasional to rare quartz veins 20mm wide. Quartz, feldspar and muscovite.	Grab		AD18254372	0.01	7.56	48.2	40	7.76	0.38	0.06		1.43	0.8	2	22.2	2.4	0.55	22.7	0.07	1		2.87	1.3	79.1	0.01	456	0.24	3.25	30.5	2.2	1320	16.4	500			0.11
SRE	69372	Dorchap Peg	EL006300	522613	5960749	456	DORCHAP	3	PEG	PEG			3x4m dyke. 5-10mm grainsize. Muscovite, quartz, feldspar. Moderately to well weathered.	Grab		AD18254372	0.03	7.39	131	20	8	0.94	0.04	0.24	1.03	0.4	4	23.9	2.7	0.81	26.4	0.07	2.7		2.21		90.2	0.01	1110	0.23	3.26	52.2	2.3	1510	13.9	440			0.13
SRE	69373	Dorchap Peg	EL006300	522604	5960612	484	DORCHAP	7	PEG	PEG			7x12m dyke striking 318deg. Smaller 0.5-1m dykes running adjacent. Crystals typically 3-10 mm. Moderately weathered. Muscovite, quartz, feldspar.	Grab		AD18254372	0.06	7.89	61.2	50	5.08	0.74	0.14	0.07	3.16	0.3	6	19.75	2.2	0.53	24.4	0.07	1.3	0.006	2.17	1.5	96.2	0.03	726	0.18	4.03	37.2	2.1	1770	12.7	385			0.08
SRE	69374	Dorchap Peg	EL006300	522609	5960570	488	DORCHAP	8	PEG		PEG		12x8m dyke. 3-10mm crystals. Mostly subcropping. Moderately weathered. Quartz, feldspar, muscovite.	Grab		AD18254372	0.04	7.46	37.6	40	6.9	0.51	0.22	0.2	1.51	0.9	4	22.5	2.8	0.52	20.4	0.08	1	0.009	3	0.8	42.3	0.01	729	0.22	3.35	32.9	1.6	2430	22.6	403			0.07
SRE	69375	Dorchap Peg	EL006300	522601	5960356	545	DORCHAP	9	PEG	PEG			9x12m dyke. Sediment contact 327/SW/77. Variable grainsize, 3-25mm. Commonly 10-15mm. Muscovite, quartz, feldspar. Pegmaitie veins 10-50cm wide with abundnat muscovite up to 35 mm. Moderately weathered.	Grab		AD18254372	0.04	7.86	17.2	100	64	0.41	0.34		9.63	0.8	8	57.2	2.3	0.34	23.8	0.07	3.1		1.54	4.6	76.9	0.06	232	0.19	4.57	79.8	2.8	2730	27.7	402			0.05
MCRE	69376	Dorchap Peg	EL006486	523124	5948195	1036	DORCHAP	7	PEG	PEG			Large dyke across stream gully. Top centre of outcrop. 7x50m. Striking 318 deg. Crystals up to 300m long, commonly 20-50mm. Quartz, muscovite, feldspar. Possible petalite. Some 10 cm thick quartz veins. Moderately weathered. Sediment contact uphill 322/S	Chip		AD18262530	0.04	7.92	6.2	10	4.11	1.01	0.23	1.99	0.8	0.3	4	41.3	1.6	0.62	19.75		0.7	0.047	3.86		72.2	0.03	1010	0.29	3.34	29.4	1.3	3050	13.8	900	0.002	0.01	0.06
MCRE	69377	Dorchap Peg	EL006486	523129	5948214	1040	DORCHAP	7	PEG	PEG			Large dyke across stream gully. Top southeast end of outcrop. 7x50m. Striking 318 deg. Crystals up to 300m long, commonly 20-50mm. Quartz, muscovite, feldspar. Possible petalite. Quartz veins at base 1-50cm thick, commonly 10cm thick. Moderately weathere	Chip		AD18262530	0.04	8.28	5	10	4.54	0.85	0.14	0.17	0.68	0.3	3	33.6	1.6	0.72	24.7	0.07	0.5	0.105	3.37		107	0.02	1480	0.19	3.37	46.2	1.2	3110	14.5	780			0.07
MCRE	69378	Dorchap Peg	EL006486	523129	5948214	1025	DORCHAP	7	PEG	PEG			Large dyke across stream gully. 7x50m. Striking 318 deg. Crystals up to 300m long, commonly 20-50mm. Quartz, muscovite, feldspar. Possible petalite. Some 10 cm thick quartz veins. Moderately weathered. Sediment contact	Chip		AD18262530	0.04	6.73	9.4	60	3.43	1.3	0.17	0.12	6.1	0.8	6	57.2	1.4	0.79	14.5	0.09	1.2	0.098	3.94	3.1	134.5	0.13	356	0.29	2.3	17.1	1.9	1940	18.2	750			0.06
MCRE	69379	Dorchap Peg	EL006486	523110	5948211	1033	DORCHAP	7	PEG	PEG			Large dyke across stream gully. Northwest end of outcrop.7x50m. Striking 318 deg. Crystals up to 300m long, commonly 20-50mm. Quartz, muscovite, feldspar. Possible petalite up to 250mm. Some 10 cm thick quartz veins. Moderately weathered.	Chip		AD18262530	0.02	8.22	15.7	40	4.98	0.43	0.35	0.11	0.6	0.3	3	45.9	1.2	0.62	24.3	0.09	1	0.053	3.72		54.9	0.01	969	0.19	3.04	55.5	1.1	3520	14.2	860	0.002		0.06
SRE	69380	Dorchap Peg	EL006300	518963	5953195	507	DORCHAP	8	PEG		PEG		12x8 m dyke, continues ~30m uphill. Apparent strike of 280deg. Largely subcropping. Homogenous grainsize 2-5mm. Quartz, feldspar, tourmaline, muscovite. Moderately to well weathered. Tourmaline 3x15 mm.	Chip		AD18262530	0.04	7.22	15.9	10	1.1	1.36	0.18	0.08	4.39	0.5	4	7.2	0.9	0.65	15.9	0.1	1.1	0.063	2.65	2.1	13	0.05	552	0.18	2.87	11	1.3	700	24.3	207	0.002		0.08
SRE	69381	Dorchap Peg	EL006300	519421	5953348	699	DORCHAP	8	PEG	PEG			8x10 m dyke. Sediment contact on southside 335/SW/74. Outcrop strike 332 deg. Crystal size typically 2-10mm. Rare pegmatitie veins with crystals to 25 mm. Common tourmaline, quartz, muscovite, feldspar. Possible petalite? Red mineral of fresher surfaces	Chip		AD18262530	0.07	7.76	5.9	10	3.1	1.02	0.09	0.27	3.27	1	5	24.4	4.9	0.99	18	0.1	1.9	0.033	2.65	1.4	20.5	0.03	2320	0.22	3.29	14.2	1.9	920	15.8	335	0.002		0.17
SRE	69382	Dorchap Peg	EL006300	519598	5953354	722	DORCHAP	4	PEG	PEG			8x4m dyke. Tyically 10-20mm crystal size. Some tourmaline to 70mm long. Some minor intervals of 2-5mm crystal sizes. Abundant large tourmaline, muscovite, feldspar, quartz,. Moderately to strongly weathered.	Chip		AD18262530	0.04	7.66	5.8	10	3.43	0.7	0.07	0.08	2.2	2.1	5	16.05	4.3	0.95	18.35	0.08	1.1	0.033	3.2	1.1	23.5	0.04	1220	0.23	2.93	18.9	2	1080	16	354	0.002		0.08
SRE	69383	Dorchap Peg	EL006300	519794	5953450	747	DORCHAP	5	PEG	PEG			7x5m dyke. Grainsize typically 10mm, but ranges from 5-30mm. Contains tourmaline, muscovite, quartz, feldspar. Modertaely to pervasively weathered.	Chip		AD18262530	0.04	7.39	2.1	30	4.03	1.33	0.06	0.07	4.64	3.6	6	9.49	3.3	0.83	18.35	0.08	1.3	0.024	1.83	2.5	23.5	0.03	908	0.22	3.39	17.5	2.8	920	13.9	254	0.002		0.05
SRE	69384	Dorchap Peg	EL006300	520037	5953462	804	DORCHAP	5	PEG	PEG			5x30m dyke, lateral extent may coninue. Striking 328 deg. Sediment contacts on both sides. South side has a large 80x80 sediment outcrop. Sediment contact =314/SW/80. Grainsize commonly 10-20mm. Minor trmaline, abundnant muscovite, dominant quartz, felds	Chip		AD18262530	0.03	8.38	5.7	20	14.3	0.49	0.05		1.75	0.5	2	27.9	2.9	0.52	22.2	0.08	1	0.01	2.52	1	24.8	0.02	783	0.17	3.86	63.8	1.3	1330	16.4	510	0.002
SRE	69385	Dorchap Peg	EL006300	520064	5953493	792	DORCHAP	8	PEG	PEG			8x20m dyke. Striking 336 deg. Pegmatite - crystals commonly 20-50 mm, ranging from 5-200mm. Muscovite abundant, feldspar, quartz. Moderately to well weathered.	Chip		AD18262530	0.03	7.8	14.4	20	4.22	1.16	0.03		0.78	0.8	3	17.35	6.6	0.52	23.8	0.07	0.5	0.026	3.78		22.5	0.02	380	0.19	2.48	48.1	1.4	1420	14.6	610	0.002		0.06
SRE	69386	Dorchap Peg	EL006300	520112	5953518	795	DORCHAP	5	PEG	PEG			60x5m dyke striking ~340 deg. Grainsize typically 20-25mm, ranging from 5-300 mm. minor tourmaline, common muscovite, quartz, feldspar. Well weathered.	Chip		AD18262530	0.03	8.18	35.9	20	4.42	0.93	0.06	0.38	1.5	1.9	4	19.15	7.4	1	22.5	0.07	1.4	0.027	3.05	1	35.9	0.02	2920	0.59	3.13	29.6	4.1	1330	13.2	470	0.002		0.07
SRE	69387	Dorchap Peg	EL006300	520237	5953532	796	DORCHAP	7	PEG	PEG			20x7m dyke. Variable grainsize mm - 100mm. Typically 1-15mm with a bimodal dustribution around 1mm and 10-15mm. Minor tourmaline, quartz, feldspar, muscovite. Moderately weathered.	Chip		AD18262530	0.03	7.59	8.3	30	3.9	1.15	0.1	0.06	1.47	0.5	3	14.7	3	0.56	19.35	0.07	1.1	0.018	2.61	0.6	24.1	0.03	573	0.22	3.74	27.1	1.5	1410	15.9	346		0.01	0.1
SRE	69388	Dorchap Peg	EL006300	520235	5953559	786	DORCHAP	4	PEG	PEG			10x4m dyke. Old workings at top - trench and quarry. Grainsize 10-50mm, typically 10-20mm. Feldspar, quartz, muscovite. Strongly weathered. Sediment contact 345/NE/56	Chip		AD18262530	0.03	8	32.1	30	3.54	0.95	0.09	0.12	2.06	0.6	5	13.3	6.4	0.83	20.2	0.09	1.5	0.02	2.65	1	29.8	0.04	910	0.3	3.66	20.9	1.6	1110	17.4	355	0.002	0.01	0.16
SRE	69389	Dorchap Peg	EL006300	520233	5953601	768	DORCHAP	15	PEG	PEG			35+x15m dyke. Bottom bulge of same dyke sampled at 69389. Old workings at top - trench and quarry. Grainsize 5-150mm, typically 10-20mm. Tourmaline, feldspar, quartz, muscovite. Moderately to well weathered	Chip		AD18262530	0.02	7.62	7	10	4.37	0.76	0.04		1.21	0.4	3	18.6	3.9	0.56	20.4	0.08	1.3	0.02	2.38	0.5	33.4	0.02	802	0.2	3.47	32.3	1.3	900	11	480	0.002		0.07
SRE	69390	Dorchap Peg	EL006300	520247	5953621	762	DORCHAP	15	PEG	PEG			35+x15m dyke. Bottom bulge of same dyke sampled at 69389. Old workings at top - trench and quarry. Grainsize 5-150mm, typically 10-20mm. Tourmaline, feldspar, quartz, muscovite. Moderately to well weathered. Sediment contact 350/E/52 and 020/E/50	Chip		AD18262530	0.09	7.68	10	10	4.32	10	0.05	0.21	2.21	0.6	3	35.9	2.7	0.82	23.3	0.09	2	0.016	2.45	1	61.4	0.02	1900	0.15	3.08	34.2	1.4	1010	10.8	430			0.22
SRE	69391	Dorchap Peg	EL006300	520126	5953455	832	DORCHAP	6	PEG		PEG		8x6m dyke. Dominantly subcropping. Grainsize 1-40mm, commonly 10-25mm. Quartz, feldspar, muscovite. Strongly weathered.	Chip		AD18262530	0.04	7.61	42.7	10	4.27	0.63	0.05	0.41	1.33	0.3	4	18.55	3.3	1.03	17.55	0.09	2.5	0.01	3.25	0.5	27.1	0.01	3620	0.28	3.48	17.1	1.3	1410	11.7	510	0.002		0.07
SRE	69392	Dorchap Peg	EL006300	522155	5969033	382	DORCHAP	2	PEG	PEG			5x2 m granite outcrop located directly above an additional granite outcrop 30 m north (457). Inferred to be the same deposit, with central part of granite subcropping. Quartz (5 mm), feldspar (20 mm), tourmaline (2.5 mm long laths). Sharp non-conformable	Chip		AD18262530	0.03	7.32	2.2	620	2.03	0.2	1.51	0.02	66.2	5.8	5	3.52	4.1	2.29	17.05	0.19	3	0.035	3.46	35.2	30.6	0.43	492	0.76	1.99	17.9	3.7	550	24.6	183		0.01	0.11
SRE	69393	Dorchap Peg	EL006300	522138	5969024	372	DORCHAP	4	PEG	PEG			7x4 m granite outcrop located directly beneath an additional granite outcrop 30 m south (456). Inferred to be the same deposit, with central part of granite subcropping. Quartz (5 mm), feldspar (20 mm), pyroxene/tourmaline (2.5 mm long laths). Sharp non-	Chip		AD18262530	0.01	7.37	1.8	570	1.82	0.09	1.76	0.03	71.2	6.2	4	3.24	2.7	2.43	16.45	0.19	3.1	0.044	3.09	36.9	31.9	0.56	536	0.49	2.06	16.6	2.6	620	19.4	160.5	0.002	0.01	0.1
SRE	69394	Dorchap Peg	EL006300	521490	5969488	335	DORCHAP	2	PEG	PEG			1x2 m pegmatite boulders distributed over 40 m^2 area. Samples collected from five lithologically similar outcrops in this area. Intergranular coarse grained pegmatites. Predominantly quartz + feldspar, minor tourmaline laths (5 mm).	Chip		AD18262530		7.58	53.5	100	6.11	0.26	0.04		2.98	1.3	6	95.3	2.3	0.51	26.8		4.4		1.66	1.8	29	0.04	365	0.15	3.34	93.8	2.2	790	20.5	890		0.01	0.14
SRE	69395	Dorchap Peg	EL006300	521517	5969455	327	DORCHAP	1	PEG	PEG			1x1 m muscovite rich pegmatite boulders. Boulders dominated by coarse muscovite books (30 mm), in a fine siliceous matrix.	Chip		AD18262530		14.55	90.5	310	193.5	0.25			0.02	0.8	2	791	1.6	0.34	68.7	0.14	2		7.53		123	0.11	644	0.1	0.45	54.7	2	380	7.5	5700			0.1
ERE	69396	Banimboola Quartz Monzodiorite	EL006277	538499	5948111	399	DORCHAP	20	DIR_C	DIR_C			>30x20m mass of Diorite beside Omeo highway. Approximately 40-45% pyroxene. Quartz and plagioclase. Moderately fresh outcrop sampled over 10x10m area. 2-5mm crystal size	Chip		AD18262530	0.04	8.47	3.4	630	1.58	0.15	5.1	0.09	46.8	29.8	120	4.98	66.1	5.92	18.35	0.19	1.2	0.057	1.48	24.3	25	3.25	1060	0.65	2.04	7	50.9	840	11.9	82.5		0.01	0.27
SRE	69397	Dorchap Peg	EL006300	519472	5966697	235	DORCHAP		PEG_GRAN	PEG_GRAN			10 x 3 m fine grained granite, generally phaneritic (some porphyritic). Mica (5 mm), feldspar matrix, quartz.	Chip		AD18262530	0.14	7.46	12.3	70	10.35	1.31	0.09	0.73	4.43	7.1	4	32.6	6.2	0.73	18.65	0.1	1.4	0.01	2.92	3.8	62.6	0.03	2050	0.22	3.15	36.5	3.1	1560	14.8	560	0.003		0.1
SRE	69398	Dorchap Peg	EL006300	519133	5969488	295	DORCHAP	3	PEG_GRAN	PEG_GRAN			5 x 10 m area exposed. Boulders generally less than 1 x 1 m. Pervasively weathered, fine to medium grained phaneritic. Feldspar, quartz, petalite. Some 100 mm petalite veins noted (possibly feldspar).	Chip		AD18262530	0.07	8.28	19.4	20	4.72	0.45	0.11	1.72	1.42	0.9	3	20.5	0.7	0.8	26.1	0.09	0.7	0.009	1.95	1.9	57.7	0.01	2310	0.17	3.89	31.2	1.4	2430	8.8	500	0.002		0.08
SRE	69399	Dorchap Peg	EL006300	519124	5967255	310	DORCHAP	10	PEG_GRAN	PEG_GRAN			Large subcrop (40m x 10m), with exposed boulders up to 2 x 2 m. Pervasively weathered, medium grained phaneritic. Feldspar, quartz, mica, small tourmaline laths).	Chip		AD18262530	0.05	8.12	10.2	20	4.7	1.05	0.06	0.05	2.01	0.4	4	35.6	1.5	0.8	24.5	0.1	1.4	0.014	3.64	0.9	109	0.03	1920	0.23	2.57	30.2	1.4	1260	14.3	670			0.06
SRE	69400	Dorchap Peg	EL006300	519064	5967347	322	DORCHAP	2	PEG_GRAN	PEG_GRAN			Boulders (3 x 2 m) outcropping over very large area. Generally subcropping. Texture is variable, with some porphyritic (2 mm tourmaine needles in silicic matrix). Some phaneritic with coarse petalite, feldspar. Quartz veins (10 cm thick present. Occasion	Chip		AD18262530	0.07	7.85	3.3	10	3.92	1.41	0.15	0.03	1.94	0.4	4	24	3.2	0.68	18.55	0.09	1.3	0.015	2.99	0.9	39.7	0.05	986	0.23	3.38	18.7	1.1	1330	14.5	490			0.07
SRE	69401	Dorchap Peg	EL006300	519112	5967360	318	DORCHAP	2	PEG_GRAN	PEG_GRAN			Boulders (3 x 2 m) outcropping over very large area. Generally subcropping. Texture is variable, with some porphyritic (2 mm tourmaine needles in silicic matrix). Some phaneritic with feldspar. Quartz veins (10 cm thick present. Occasional sharp contacts	Chip		AD18262530	0.05	7.54	12.4	20	3.27	0.95	0.08	0.19	1.13	0.3	4	21.2	2.6	0.66	21.8	0.1	0.9	0.011	2.45	0.5	118	0.02	408	0.25	3.32	26.1	1.2	1800	11.1	470			0.05
SRE	69402	Dorchap Peg	EL006300	519059	5967395	331	DORCHAP	2	PEG_GRAN	PEG_GRAN			Pegmatite outcrop (20 x 2 m). Generally fine grained (quartz, mica), some coarse feldspar crystals. Tourmaline absent.	Chip		AD18262530	0.06	8.08	9.1	10	3.27	1.02	0.11	0.14	1.41	0.2	3	18.95	1.9	0.58	23.6	0.06	1.4	0.006	2.04	0.6	81	0.02	965	0.55	4.01	28.3	2.6	1840	11.3	470			0.05
SRE	69403	Dorchap Peg	EL006300	519029	5967440	334	DORCHAP	1	PEG_GRAN	PEG_GRAN			In situ subcrop with boulders (1 x 1 m) exposed. Phaneritic medium to coarse grained mica, feldspar, quartz. Sharp contact noted with meta-sedimentary rocks.	Chip		AD18262530	0.06	8.21	10.6	10	3.14	1.18	0.12	1.06	1.04	0.4	2	27.4	1.4	0.69	23	0.07	1	0.015	2.36	0.6	64.6	0.01	1060	0.16	4.19	26.6	0.9	2990	11.4	500			0.06
SRE	69404	Dorchap Peg	EL006300	519020	5967496	342	DORCHAP		PEG_GRAN	PEG_GRAN			Pegmatite outcrop (10 m) exposed. Phaneritic medium grained feldspar, quartz. Muscovite. Sharp contact with meta-sedimentary country rock noted.	Chip		AD18262530	0.05	7.54	49.6	20	3.83	0.76	0.12	0.18	4.21	0.4	4	31.3	1.1	0.71	24.7	0.08	1.7		2.08	2.8	108.5	0.05	1300	0.2	3.11	35.9	1	1510	11.2	530			0.05
SRE	69405	Dorchap Peg	EL006300	519021	5967514	350	DORCHAP		PEG_GRAN	PEG_GRAN			Coarse grained phaneritic, with feldspar, quartz, tourmaline (40 mm laths). Heavily weathered surface. Appears to have been sampled (fresh exposed faces).	Chip		AD18262530	0.07	6.92	11.7	20	2.88	3.17	0.04	0.04	1.65	0.3	4	15.55	1.8	0.64	16.25	0.07	1.1	0.015	2.8	1.9	29.2	0.02	619	0.19	3.18	20.3	1	1190	14.3	412		0.01	0.05
SRE	69406	Dorchap Peg	EL006300	518991	5967570	345	DORCHAP		PEG_GRAN	PEG_GRAN			Coarse grained phaneritic, with feldspar, quartz, tourmaline (40 mm laths). Heavily weathered surface. Appears to have been sampled (fresh exposed faces).	Chip		AD18262530	0.05	7.84	12.3	10	2.91	0.9	0.08	0.15	2.06	0.3	3	18.5	1	0.78	18.9	0.08	1.5	0.014	3.05	1.1	33.3	0.02	1770	0.16	3.41	16	1.1	1420	11.4	510			0.05
MIRE	69407	Dorchap Peg	EL5315	519752	5952014	722	DORCHAP	5	PEG	PEG			4x5m dyke. Grainsize dominantly 5-10mm. Tourmaline, muscovite, quartz, feldspar. Strongly weathered. Some plumerouse muscovite. Tourmailine typically as needles.	Chip		AD18262530	0.02	7.71	30.4	10	2.1	0.68	0.09	0.28	2.01	0.3	3	13.2	1.3	0.92	17.05	0.09	0.8	0.023	2.88	0.9	25.7	0.03	1720	0.17	3.18	13.5	1.1	870	15	324			0.06
MIRE	69408	Dorchap Peg	EL5315	519766	5952057	724	DORCHAP	7	PEG	PEG			13x7m dyke. Strike 310deg. Variable grainsize from 1-50 mm, commonly 5-10mm. Tourmaline, quartz, feldspar, muscovite. White fine grained material (1-2mm) has abundant tourmaile and garnet. Mderately to well weathered. Some tourmaline had a translucent co	Chip		AD18262530	0.05	8.29	3.7	20	2.74	2.56	0.1	0.07	2.34	0.7	5	16.35	2.2	0.72	19.15	0.1	1	0.029	3.41	1.2	17.4	0.03	493	0.26	3.36	27.8	1.3	1030	18	363			0.05
MIRE	69409	Dorchap Peg	EL5315	519824	5952123	732	DORCHAP	5	PEG	PEG			16x5m dyke. Striking 315 deg. Domianntly 5-10mm, ranging from 5-35 mm with rare feldspars up to 200mm. Tourmaline, quartz, feldspar, muscovite. Pervasively weathered.	Chip		AD18262530	0.03	7.68	1.8	10	4.22	1.39	0.09	0.1	1.39	0.3	3	10.3	3.9	0.75	16.55	0.09	0.7	0.015	3.45	0.7	18.9	0.03	1100	0.19	3	21.7	1.1	1370	20.1	363			0.05
MIRE	69410	Dorchap Peg	EL5315	519914	5952101	788	DORCHAP	8	PEG	PEG			5x8m dyke, striking 323 deg. Dominantly 1-3mm but with common 20-50cm wide veins of pegmatitie (30-40mm crystals). Abundnant fine needles of tourmaline, quartz, feldspar, muscovite and rare garnet. Modeerately to well weathered	Chip		AD18262530	0.03	7.35	43.9	20	2.12	0.77	0.11		1.61	0.4	12	11.1	5.4	0.71	16.9		1	0.026	2.92	0.7	8.5	0.03	377	0.34	3.17	19.8	4.9	1130	16.3	330		0.01	0.09
MIRE	69411	Dorchap Peg	EL5315	519727	5952722	758	DORCHAP	9	PEG	PEG			24x9m dyke, striking 310 deg. Variable grainsize 3-50mm, commonly 10-15 mm. Common tourmaline, muscovite, quartz, feldspar and occasional garnet. Strongly weathered.	Chip		AD18262530	0.05	7.72	14.6	10	2.39	0.42	0.05		4.14	0.9	4	17.65	3.8	0.59	15.4	0.05	0.8	0.015	4.21	1.3	20.4	0.02	493	0.19	2.77	12.2	1.4	1160	21.2	420			0.05
MIRE	69412	Dorchap Peg	EL5315	519730	5952733	755	DORCHAP	8	PEG	PEG			14X8 m dyke. Dominanly 10-20mm grainsize, but ranges from 5-250mm. Some large feldspars in places (250mm). Occasional muscovite rich pegmatite veins up to 30cm thick. Tourmaline, quartz, feldpsar, muscovite. Strongly weathered.	Chip		AD18262530	0.04	7.94	12.7	40	2.77	0.43	0.05	0.12	1.49	0.6	4	20.9	2.5	0.76	15.55		0.9	0.015	5.02	0.7	29.8	0.02	1230	0.26	2.53	13.8	1.3	1460	21.6	560			0.06
MIRE	69413	Dorchap Peg	EL5315	519136	5952749	507	DORCHAP	10	PEG	PEG			22x10 m dyke. Part of a cluster of three large dykes immediately adjacent to one another. Vaiable grainsize 3-60mm, commonly 5-15mm. Common tourmaline, quartz, muscovite, feldspar, occasional to common garnet in fine size fraction. Pervasively weathered.	Chip		AD18262530	0.04	7.48	6.8	10	1.02	1.24	0.17	0.05	4.93	0.6	4	8.02	1.8	0.57	15.55		0.9	0.03	3.41	2.5	14.5	0.04	383	0.2	2.61	9.4	1.1	590	30.3	247			0.07
MIRE	69414	Dorchap Peg	EL5315	519117	5952758	491	DORCHAP	20	PEG	PEG			35x20m dyke. Part of a cluster of three large dykes immediately adjacent to one another. Grainsize ranges from 3-70mm, but dominantly 5-15mm. Quartz, feldspar, muscovite. Abundant tourmaline, rare garnet. Strongly weathered	Chip		AD18262530	0.04	7.59	21	10	0.88	1.6	0.2	0.05	5.73	0.5	5	5.74	1.8	0.81	15.05		0.8	0.02	2.58	2.8	10.7	0.06	211	0.25	3.16	8.5	1.2	600	29.4	174.5			0.1
MIRE	69415	Dorchap Peg	EL5315	519132	5952789	498	DORCHAP	20	PEG	PEG			25x20m dyke. Striking 300deg. Part of a cluster of three large dykes immediately adjacent to one another. Grainsize ranges from 3-70mm, but dominantly 5-15mm. Quartz, feldspar, muscovite. Abundant tourmaline, rare garnet. Strongly weathered	Chip		AD18262530	0.05	7.71	22.7	20	1.04	2.74	0.2	0.02	4.17	0.4	5	6.55	2.1	0.69	16.75		0.7	0.041	3.05	2.1	16.5	0.06	157	0.19	2.71	17.5	1	660	26.8	219			0.1
MIRE	69416	Dorchap Peg	EL5315	519158	5952726	512	DORCHAP	20	PEG	PEG			25x20m dyke. Same dyke as 69415. Part of a cluster of three large dykes immediately adjacent to one another. Grainsize ranges from 3-70mm, but dominantly 5-15mm. Quartz, feldspar, muscovite. Abundant tourmaline, rare garnet. Strongly weathered	Chip		AD18262530	0.06	7.41	73.9	20	0.77	1.59	0.22	0.04	4.27	0.6	6	5.26	1.9	0.8	14.6		0.5	0.027	3.21	2.1	12.7	0.05	137	0.29	2.68	9.3	0.7	630	39.5	199			0.17
ERE	69417	Banimboola Quartz Monzodiorite	EL006277	537833	5947101	392	DORCHAP	30	DIR_C	DIR_C			>30x30m mass of Diorite in river bed. Approximately 40-45% pyroxene. Quartz and plagioclase. Fresh outcrop sampled in riverbed over 7x10m area. 2-5mm crystal size	Chip		AD18262530	0.04	7.59	7.6	730	1.29	0.26	4.68	0.09	45.6	25.3	83	6.17	62	5.09	16.5	0.09	1.2	0.044	1.95	24.1	29.9	2.6	884	0.8	1.97	7.1	32.7	570	15	84.3		0.01	0.51
SRE	69418	Dorchap Peg	EL006300	520451	5956637	434	DORCHAP	20	PEG	PEG			Large dyke approx 60x20m but likely larger? Sample collected from a 10x10m area. Crystals dominantly 3-12mm, but ranges from 2-40mm. Abundant fine needles of tourmaline, muscovite, feldspar, quartz. Pervasively weathered.	Chip		AD18262530	0.05	7.21	28.6	10	2.68	0.86	0.13	0.03	2.29	0.4	6	15.6	2.6	0.92	16.15		1	0.016	2.54	1	21.2	0.04	726	0.3	3	14.9	1.4	1030	16.2	308			0.13
SRE	69419	Dorchap Peg	EL006300	520442	5956676	453	DORCHAP	20	PEG	PEG			Large dyke approx 60x20m but likely larger? Sample collected from a 10x10m area. Crystals dominantly 3-12mm, but ranges from 2-40mm. Abundant fine needles of tourmaline, muscovite, feldspar, quartz. Pervasively weathered. Pegmatite veins upto 30cm wide a	Chip		AD18262530	0.05	7.12	35.3	10	1.82	0.48	0.12	0.08	2.04	0.3	5	18.75	1.6	0.72	13.95		0.9	0.014	3.39	1	20.6	0.03	515	0.22	2.89	10.3	1.1	1230	18.9	330			0.07
SRE	69420	Dorchap Peg	EL006300	520467	5956631	438	DORCHAP	20	PEG	PEG			Large dyke approx 60x20m but likely larger? Sample collected from a 10x10m area. Crystals dominantly 3-12mm, but ranges from 2-40mm. Abundant fine needles of tourmaline, muscovite, feldspar, quartz. Pervasively weathered.	Chip		AD18262530	0.03	7.39	19.6	10	2.4	0.96	0.15	0.02	2.04	0.3	7	14.15	2.3	0.93	14.6		0.8	0.013	3.17	0.9	15.5	0.03	451	0.34	3.14	8	0.9	1230	20.4	299			0.06
MIRE	69421	Dorchap Peg	EL5315	521705	5948821	967	DORCHAP	8	PEG	PEG			22 x 8 m dome, striking 295deg. Dominantly 1-5mm crystal size. 10-20cm thick veins of pegmatite (10-35mm diameter). Tourmaline present (mm), quartz, feldspar, muscovite. Moderately weathered.	Chip		AD18262530	0.03	7.71	103	20	6.97	0.86	0.09	0.1	1.79	0.3	4	22.7	3.6	0.68	18.35		1.1	0.026	2.85	1.1	18	0.03	908	0.18	3.31	26.5	1	1330	11.7	490			0.12
MIRE	69422	Dorchap Peg	EL5315	521674	5948747	1006	DORCHAP	12	PEG	PEG			6 x 12m outcrop, striking 325deg. Crystal size ranges from 2-60mm, typically 3-15 mm. Large feldspars 40-60mm. Quartz, feldspar, muscovite. Fine tourmaline needles and garnets mm in fine grained material.	Chip		AD18262530	0.02	8.06	23	30	4.32	1.49	0.04	0.12	4.04	0.7	8	25.7	5.3	1.12	22.6		2.6	0.028	2.3	1.9	23.9	0.03	2770	0.34	3.47	43.2	3.5	1240	11.9	450			0.08
MIRE	69423	Dorchap Peg	EL5315	521637	5948660	1031	DORCHAP	5	PEG	PEG			12x5m outcrop, striking 340deg. Dominantly fine grained (2-10mm), ranging upto 150mm. Veins of pegmatite upto 25cm wide with crystals 20-150mm. Contains uscovite, quartz, feldspar. Moderately to strongly weathered.	Chip		AD18262530	0.07	7.83	13.2	10	3.22	0.58	0.04	0.28	1.59	0.2	4	21.2	5.1	0.97	21.9		1.9	0.026	2.78	0.6	29.1	0.01	2240	0.24	3.27	33.3	1.1	1150	8.9	520			0.11
MIRE	69424	Dorchap Peg	EL5315	521345	5948275	875	DORCHAP	10	PEG	PEG			13x10m outcrop. Grainsize dominantly 10-25mm, ranging from 1-250mm. Muscovite, feldspar, quartz. Garnets (1mm) in fine grained fraction (1-3mm). Moderately to strongly weathered.	Chip		AD18262530	0.02	7.77	3.4	40	2.99	0.34	0.09	0.07	4.15	0.8	6	12.8	1.9	0.68	18.45		0.7	0.023	2.21	2.1	21.7	0.05	587	0.35	3.8	37.4	2.1	1100	13.9	326			0.07
MIRE	69425	Dorchap Peg	EL5315	521771	5947894	947	DORCHAP	32	PEG	PEG			11x32m outcrop, striking 320deg. Grainsize commonly 10-20mm, ranging from 2-170mm. Muscovite, feldspar, quartz, plumerose muscovite. Tourmaline common as fine needles mm wide. Possible cassiderite. Large amount of subcrop in surrounding area. Moderatel	Chip		AD18262530	0.06	7.39	14.7	40	2.42	1.21	0.04	0.06	1.3	0.3	5	16.8	2.8	0.74	15.55		0.7	0.027	4.39	0.6	22.3	0.03	593	0.28	2.44	15.2	1.3	1190	32.5	470			0.13
MIRE	69426	Dorchap Peg	EL5315	521965	5947831	919	DORCHAP	10	PEG	PEG			20x10m outcrop. Grainsize dominantly 10-15mm, ranging from 1-200mm. Contains muscovite, quartz, feldspar. Large tourmaline 19x70mm. Pervasively weathered. Slickenlines 030/E/78.	Chip		AD18262530	0.04	7.19	6.7	10	3.05	1.7	0.08	0.12	1.37	0.2	4	12.8	3.2	0.78	20.3		0.8	0.027	2.45	0.6	26.9	0.04	1020	0.25	2.86	30.1	1.5	1000	12.6	351			0.06
SRE	69427	Dorchap Peg	EL006300	520815	5955203	598	DORCHAP	14	PEG	PEG			12x14m outcrop. Grainsize dominantly 20-40mm, ranging from 10-200mm. Abundant muscovite to 90mm, feldspar to 200mm, quartz to 150mm. Minor tourmaline 1-5mm. Strongly to pervasively weathered.	Chip		AD18262530	0.02	8.12	4.2	50	2.99	0.92	0.04	0.02	3.8	1.1	8	19.05	3.5	0.59	19.4		1.2	0.027	3.97	2.4	25.3	0.02	461	0.26	3.11	33.6	3.5	1620	16.5	700			0.05
SRE	69428	Dorchap Peg	EL006300	519932	5954579	811	DORCHAP	4	PEG	PEG			25x4m outcrop, striking 312deg. Grainsize dominantly 20-30mm, ranges from 1-120mm. Common muscovite, quartz, feldspar. Pervasively weathered. Rare garnet mm, minor tourmaline <3mm in fine grained material.	Chip		AD18262530	0.02	7.88	16	20	6.15	1.16	0.09		0.79	0.4	8	10.15	8.7	0.69	18.8	0.05	0.9	0.019	3.22		18.2	0.03	384	0.31	3.23	42.8	2.8	1790	24.2	290			0.07
SRE	69429	Dorchap Peg	EL006300	519887	5954566	810	DORCHAP	7	PEG	PEG			20x 7m outcrop, striking 308 deg. Common muscovlite, quartz, feldspar. Minor fine needles of tourmaline (<3mm). Minor garnet mm. Grainsize varies between 1-140mm, commonly 2-20mm. Pervasively weathered.	Chip		AD18262530	0.03	7.88	38.9	30	6.51	0.46	0.09	0.1	1.17	0.5	3	14.85	4.1	0.7	18.6		2.5	0.014	2.41	0.5	19.4	0.02	1140	0.19	3.72	39.3	1.3	1520	16.2	358			0.07
SRE	69430	Dorchap Peg	EL006300	519804	5954601	818	DORCHAP	7	PEG	PEG			30+ x 7m outcrop, striking 323deg. Muscovite, feldspar, quartz. Common tourmaline. Densely banded quartz and tourmaline layers. Grainsize varies between 3-170mm, dominanly 10-20 mm. Strongly weathered	Chip		AD18262530	0.02	7.13	15.3	20	5.19	0.41	0.05	0.02	8.69	0.4	8	13.6	4.9	0.75	16.5		1.4	0.013	1.87	4.2	18.1	0.05	406	0.35	3.35	37.4	2	980	12.4	254			0.06
SRE	69431	Dorchap Peg	EL006300	519766	5954601	821	DORCHAP	10	PEG	PEG			Northwest end of dyke sampled at 69439. 40+ x 9m outcrop, striking 323deg. Muscovite, feldspar, quartz. Common tourmaline. Grainsize varies between 3-170mm, dominanly 10-20 mm. Strongly weathered	Chip		AD18262530	0.01	8.07	2.8	50	9.76	0.54	0.06		1.83	0.6	4	22.6	3.7	0.55	18.7		1.3	0.007	3.94	0.9	25	0.02	349	0.21	3	31.6	1.5	1770	22.8	530			0.1
SRE	69432	Dorchap Peg	EL006300	519626	5954651	835	DORCHAP	9	PEG	PEG			10x9m outcrop. Grainsize varies from 3-90mm, commonly 10-15mm. Contains common tourmaline, quartz, feldspar, muscovite. Possible cassiderite.	Chip		AD18262530	0.04	8.25	3.5	30	13.9	1.15	0.09	0.08	1.53	0.5	5	16.2	10.4	0.73	21.2		0.8	0.017	3.15	0.7	30.1	0.03	669	0.9	3.24	33.4	6.2	1830	20.5	360		0.01	0.06
SRE	69433	Dorchap Peg	EL006300	519603	5954665	840	DORCHAP	7	PEG	PEG			19x7m outcrop, striking 305deg. Grainsize ranges from 2-120mm, commonly 5-25mm. Contains quartz, feldspar, muscovite, minor tourmaline	Chip		AD18262530	0.02	7.5	8.1	20	5.62	0.52	0.08	0.21	1.13	0.3	4	12.9	4.4	0.69	19.05		0.9	0.014	2.37		27	0.03	1100	0.44	3.33	22.4	2.5	1550	15.1	280			0.06
SRE	69434	Dorchap Peg	EL006300	519527	5954680	843	DORCHAP	6	PEG	PEG			26 x 6m outcrop, striking 288deg. Grainsize ranges from 1-60mm, commonly 2-10mm. Conatins tourmaline, quartz, feldspar, muscovite. Minor garnet mm. Moderately to strongly weathered.	Chip		AD18262530	0.03	7.76	2.5	10	6.56	0.69	0.08	0.19	1	0.4	5	12.35	2.5	0.82	18.6		0.7	0.018	2.27		21.9	0.02	1430	0.31	3.68	18.9	1.6	1700	14.6	258
SRE	69435	Dorchap Peg	EL006300	519301	5954631	795	DORCHAP	5	PEG	PEG			10x5m dyke. Series of 30-50cm thick pegmatite veins beneath it exposed in subvertical rock face. Vein follow and run orthogonal to bedding. Bedding =320/NE/68. Dyke is dominanly fine grained 1-3mm, and contains muscovite, quartz, feldspar, tourmaline, ga	Chip		AD18262530	0.03	7.75	6.2	10	3.44	0.67	0.11	0.16	1.83	0.3	5	12.75	5.2	0.89	16.3		1.2	0.022	2.8	0.8	15.1	0.02	1200	0.34	3.61	19.2	1.7	1200	18.2	286			0.07
SRE	69436	Dorchap Peg	EL006300	519298	5954642	804	DORCHAP	9	PEG	PEG			12x9m outcrop. Grainsize ranges from mm-25mm, dominantly 1-3mm. Tourmaline, muscovite, feldspar, quartz. Minor garnet mm. Moderately to well weathered.	Chip		AD18262530	0.02	7.29	32.1	20	3.94	0.46	0.07	0.13	1.54	0.3	5	15.95	2.9	0.81	16.45		0.9	0.018	3.3	0.9	19.6	0.03	1060	0.29	2.95	23.5	1.1	1300	17.5	368		0.01	0.07
SRE	69437	Dorchap Peg	EL006300	519188	5954891	822	DORCHAP	5	PEG	PEG			15x5m outcrop, striking 326 deg. Grainsize ranges from mm - 200mm, dominantly 1-10mm. Abundant tourmaline, muscovite, feldspar, quartz. Strongly weathered.	Chip		AD18262530	0.05	7.12	15.9	20	4.73	0.75	0.07	0.19	1.69	0.3	4	12.55	3.4	0.85	15.85		1.1	0.013	2.95	0.7	22.1	0.02	1510	0.27	3.05	12.4	1.1	1240	11.7	342			0.08
UNK	69438	Yabba Granite	OUT	532397	5968979	735	DORCHAP	6	PEG_GRAN		PEG_GRAN		4x6m subcrop. 1-3mm grainsize - consistent. Quartz, feldspar, muscovite. Pervasively weathered	Chip		AD18262536	0.03	7.61	0.6	10	15.2	6.52	0.13		2.27	1.1	4	18.7	2.8	0.67	22		2.4	0.016	3.04	1	42.3	0.04	1260	0.16	3.22	19.5	1.7	680	16.7	490		0.01
UNK	69439	Yabba Granite	OUT	532369	5969029	742	DORCHAP	50-30	GRN_M	GRN_M			Large outcrop approx 50-30 m. Forms a large dome. 1-3mm grainsize. Quartz, felspar, muscovite. Pervasively weathered.	Chip		AD18262536	0.06	7.56	1.4	10	12.65	4.33	0.29	0.06	8.43	0.7	5	16.75	10.6	0.81	20.9		1.8	0.056	3.44	3.6	63.7	0.04	687	0.36	2.88	16	1.8	850	28	430		0.01	0.06
	69440	Dorchap Peg
SRE	69441	Dorchap Peg	EL006300	519671	5968148	359	DORCHAP	10	PEG_GRAN	PEG_GRAN			Coarse grained phaneritic. Large (40mm mica books) in loose boulders. Some rocks in area contain tourmaline (40mm laths). Coarse K-feldspar crystals.	Chip		AD18262536	0.07	7.83	52.3	20	4.65	1.92	0.14		1.27	0.5	3	51.5	1.3	0.56	27.3		1.2	0.028	3.21	0.6	54	0.01	792	0.14	2.93	59.5	1.1	1910	12.3	920		0.01	0.05
SRE	69442	Dorchap Peg	EL006300	519815	5967225	381	DORCHAP	1	PEG_GRAN	PEG_GRAN			Small (1 x 1 m) pegmatite/granite boulders. Fine to medium grained, pervasively weathered. Quartz, feldspar, mica.	Chip		AD18262536	0.07	8.04	19.4	30	2.42	0.68	0.16		2.27	1.2	3	28.2	1.8	0.51	23.5		1.6	0.018	2.63	1.5	28.5	0.01	518	0.15	3.73	58	1.4	1890	15.8	620
MCRE	69443	Dorchap Peg	EL006486	534256	5943452	988	DORCHAP	4	PEG		PEG		Subcrop sampled over 4 m area. Quartz veins 2-10 cm thick and forming approx 10% of material. Grainsize is dominantly 10-15mm. Contains quartz, feldspar, muscovite, petalite.	Chip		AD18262536	0.07	6.81	11.9	30	85.5	0.12	0.05		0.78	0.7	5	30.1	0.6	0.6	15.25		0.9		1.81	0.6	117	0.01	192	0.25	3.14	48.5	1.7	1040	15.5	570			0.08
MCRE	69444	Dorchap Peg	EL006486	534277	5943438	987	DORCHAP	5	PEG		PEG		3x5m subcrop. Grainsize 10-20 mm. Contains quartz, feldspar, muscovite. Possible minor petalite. Strongly weathered.	Chip		AD18262536	0.04	8.73	9.6	60	75	0.14	0.09		1.16	0.4	4	45	0.7	0.37	17.1		1		3.4	1.2	82.6	0.01	145	0.17	3.92	63.9	1.2	1560	18.1	1000			0.05
MCRE	69445	Dorchap Peg	EL006486	534217	5943476	990	DORCHAP	5	PEG		PEG		5x5 m subcrop. Large petalite crystals to 300mm, quartz, feldspar and muscovite typiclly 5-20mm. Moderately weathered	Chip		AD18262536	0.03	8.26	0.6	10	167.5	0.12	0.11	0.34	0.86	0.3	4	41.7	0.7	0.52	19.95	0.05	1.9		1.73		3040	0.01	463	0.26	4.11	121	1.1	2630	13.6	720			0.12
MIRE	69446	Dorchap Peg	EL5315	533700	5942224	1118	DORCHAP	6	PEG		PEG		5x6m subcrop. Abundant cassiderite, quartz, feldspar, muscovite to 40 mm in size. Some feldspars to 120mm. Possible petalite? Strong green weathering. Moderately to strongly weathered	Chip		AD18262536	0.03	8.09	7.2	10	4.09	0.44	0.24	0.56	0.33	0.3	3	25.1	1.6	0.59	25.6		0.3		2.61		67.5		1200	0.23	3.46	56.3	0.9	3270	10.6	810			0.1
MIRE	69447	Dorchap Peg	EL5315	533698	5942228	1118	DORCHAP	10	PEG			PEG	Mullock sampled between two shafts on north side of road, sampled over a 10m area. Quartz up to 400mm, feldspar to 300mm, muscovite to 20mm, cassiderite to 10mm. Minor possible petalite to 90mm. Moderately to strongly weathered.	Chip		AD18262536	0.05	8.74	2.4	40	17.5	0.21	0.15		1.48	0.6	4	51	1.4	0.51	23.9		1		3.19	1.2	62.9	0.01	566	0.21	3.24	60.8	1.6	2210	12.7	990			0.12
MIRE	69449	Dorchap Peg	EL5315	533720	5942200	1116	DORCHAP		PEG			PEG	Mullock sampled between two shafts on south side of road, sampled over a 5x5m area. Grainsize dominantly 10-20mm, ranging between 5-170mm. Quartz, feldspar, muscovite. Minor cassidurite. Possible petalite. Strongly weathered.	Chip		AD18262536	0.03	8.61	4.8	10	43.3	0.4	0.11	0.25	1.01	0.7	4	55.4	1	0.48	23.5		2.1		2.46	1.4	51		286	0.23	3.94	94.9	2.4	2170	11.3	980			0.06
MIRE	69448	Dorchap Peg	EL5315	533722	5942191	1114	DORCHAP		PEG			PEG	Mullock sampled on north side of southern-most shaft, sampled over a 5x5m area. Grainsize dominantly 10-20mm, ranging between 3-30mm. Quartz, feldspar, muscovite. abundant cassidurite. Strongly weathered.	Chip		AD18262536	0.05	8.14	0.8	10	13.95	0.33	0.08		0.45	0.4	6	55	0.9	0.44	18.65		1.9	0.008	3.47		67.3		178	0.42	3.34	66	1.8	1680	15.8	1170			0.08
MIRE	69450	Dorchap Peg	EL5315	533705	5942223	1118	DORCHAP		PEG	PEG			4x3m area of in situ rock sampled at top of shaft. Very weathered. Quartz, feldspar, muscovite, possible cassidurite. Grainsize consistently around 10mm	Chip		AD18262536	0.04	9.21	12.3	90	5.35	0.35	0.05	0.52	8.32	3.7	8	44.4	2.7	0.84	28.1	0.09	2	0.024	3.05	4.2	203	0.07	963	0.32	2.45	68.9	5.3	1250	12.1	1000		0.01	0.12
MIRE	69451	Dorchap Peg	EL5315	532990	5940578	1251	DORCHAP	1	PEG	PEG			1m wide dyke. Dominated by quartz. Abundant possible cassidurite, some feldspar, minor muscovite. Size ranges from 1-20mm, dominantly 3-10mm.	Chip		AD18262536	0.03	7.63	26.7	180	1.65	0.45	0.06		2.66	1.2	6	16.6	45.8	1.06	16.65		0.7	0.023	4.19	1.6	20.7	0.05	216	0.41	1.99	17.8	4.1	1770	17.5	520		0.01	0.18
SRE	69452	Dorchap Peg	EL006300	519549	5967870	331	DORCHAP	2	PEG_GRAN	PEG_GRAN			4m x 2m boulders, distributed over 30m x 10m area. Phaneritic, coarse grained K-feldspar crystals, mica.	Chip		AD18262536	0.06	8.19	7.9	30	2.11	0.65	0.06	0.06	1.14	0.5	4	34.9	2.2	0.68	22.8		1.3	0.012	3.8	0.5	22.5	0.01	710	0.24	3.17	44.4	1	2050	12.6	840		0.01	0.1
MIRE	69453	Dorchap Peg	EL5315	532887	5940546	1275	DORCHAP	12	PEG	PEG			10x12m dyke. Apparent strike of 335 deg. Grainsiz between 10-20mm. Quartz, feldspar, muscovite.	Chip		AD18262536	0.1	8.17	12.7	10	1.16	0.53	0.05	0.06	1.46	0.8	5	15	5.7	0.7	18	0.07	0.7	0.04	3.75	0.7	17.5	0.02	615	0.47	3.16	16	2.8	1350	14.1	490			0.11
MIRE	69454	Dorchap Peg	EL5315	533001	5940590	1255	DORCHAP	11	PEG	PEG			11m wide pegmatite dyke, striking 310deg. Dominant grainsize is 2-5mm, although feldspar get up to 400mm, quartz to 100mm, and muscovite to 30mm. Minor tourmaline <4mm. Strongly weathered	Chip		AD18262536	0.06	8.06	5.6	20	2.48	0.24	0.12	0.15	2.13	0.5	6	15.3	39.6	1.02	20.4		1.1	0.032	2.57	0.9	35.9	0.03	1530	0.69	3.43	19.6	2.1	1680	12.1	409			0.11
MIRE	69455	Dorchap Peg	EL5315	533020	5940574	1260	DORCHAP	6	PEG		PEG		6x6m subcrop sampled 30m uphill from road. Variable grainsize, 2-20mm, dominantly 2-6mm. Strongly weathered. Contains quartz, feldspar, muscovite.	Chip		AD18262536	0.14	8.76	5.9	40	3.19	0.33	0.13		1.27	0.5	3	33.1	49.1	0.84	24.5	0.06	1.7	0.026	3.28	0.6	33.7	0.03	1100	0.71	3.73	31.4	1	2030	12.8	590			0.12
MIRE	69456	Dorchap Peg	EL5315	532910	5940528	1277	DORCHAP	5	PEG	PEG			9x5m dyke striking 323deg. Common tourmaline, quartz, feldspar and muscovite present. Grainsize ranges from 3-50mm, typically 10-20mm. Strongly weathered,	Chip		AD18262536	0.1	7.2	35.7	10	1.06	4.4	0.06	0.07	2.31	0.7	4	13.6	8.3	0.68	18.05		0.7	0.066	3.12	1.1	20.8	0.02	507	0.34	2.66	25.9	2	1100	12.5	430			0.13
MIRE	69457	Dorchap Peg	EL5316	532864	5940527	1164	DORCHAP	3	PEG			PEG	3x3m float. Grainsize dominantly 6-7mm. Strongly weathered. Contains quartz, feldspar, muscovite.	Chip		AD18262536	0.11	8.54	37.6	20	1.45	0.34	0.05	0.3	1.77	0.6	3	16.65	9.2	0.67	21		1.1	0.05	4.08	0.8	19.6	0.02	615	0.34	3.21	26.3	1.9	1720	14.6	580			0.13
MIRE	69458	Dorchap Peg	EL5315	532860	5940551	1263	DORCHAP		PEG			PEG	Float - overburnden from road construction. Dominated by quartz and feldspar. Minor muscovite. Moderately to well weathered. Quartz up to 40mm, muscovite to 20mm, feldspar to 85mm.	Chip		AD18262536	0.08	8.66	48.9	40	1.42	0.57	0.02	0.03	1.8	1.4	4	15.55	19.5	0.67	20.8	0.05	0.6	0.064	4.79	0.8	21	0.04	351	0.34	2.42	18.3	3	1430	18	620			0.24
MIRE	69459	Dorchap Peg	EL5315	532873	5940483	1281	DORCHAP	7	PEG			PEG	Float sampled over a 6x7m area. Along strike from 50 cm wide outcrop cut by road striking 350deg. Strongly weathered 30-50cm boulders. Quartz, feldspar, muscovite. Grainsize aroun 5-10mm.	Chip		AD18262536	0.06	8.09	8	10	2.07	0.4	0.06	0.08	2.59	0.8	5	9.08	7.1	0.85	18.35		1.2	0.022	1.41	1.3	15.7	0.02	1220	0.47	4.33	22.5	3.5	1240	12.4	221		0.01	0.13
MIRE	69460	Dorchap Peg	EL5315	532735	5940417	1298	DORCHAP	40	PEG	PEG			20x40m dyke striking 342deg. Same as 69471. Sample collected over 10x10m area in middle of dyke length. Grainsize ranges from 3-40mm, dominantly 5-12mm. Common tourmaline, quartz, feldspar, muscovite. Strongly weathered	Chip		AD18262536	0.13	7.86	13.8	10	1.28	1.21	0.14	0.17	3.01	0.5	4	33.2	1.2	0.8	18.85	0.06	0.9	0.053	3.03	1.4	49.2	0.04	324	0.35	3.06	18.7	1.7	1490	16.2	393			0.49
UNK	69461	Yabba Granite	OUT	532373	5969073	730	DORCHAP	50-30	PEG_GRAN	PEG_GRAN			Same outcrop as 69439. Large outcrop approx 50-30 m. Forms a large dome. 1-3mm grainsize. Quartz, felspar, muscovite. Pervasively weathered.	Chip		AD18262536	0.01	7.86	1.3	20	9.05	3.81	0.25		11.75	0.3	4	17.05	1.8	0.83	21.5	0.06	1.9	0.064	3.51	4.8	79.8	0.04	459	0.23	2.81	14.5	0.9	750	29.3	460			0.71
UNK	69462	Yabba Granite	OUT	532383	5969105	713	DORCHAP	50-30	PEG_GRAN	PEG_GRAN			Same outcrop as 69439, 69461. Large outcrop approx 50-30 m. Forms a large dome. 1-3mm grainsize. Quartz, felspar, muscovite. 0cm thick veins of pegmatite with grainsize upto 20mm. strongly weathered.	Chip		AD18262536	0.03	8	2.4	10	9.15	3.68	0.21		11	0.7	4	26.3	2.1	0.98	23.4	0.05	1.8	0.077	3.54	4.6	156.5	0.05	670	0.21	2.66	16.3	1.3	610	26.6	480			0.33
UNK	69463	Yabba Granite	OUT	532446	5969345	646	DORCHAP	7	GRN_M		GRN_M		20x7m subcrop, striking 318deg. 2-5mm grainsize. Muscovite, feldspar, quartz, biotite/altered muscovite. Pervasively weathered	Chip		AD18262536	0.04	7.97	1.7	10	9.45	4.34	0.21		7.34	0.8	4	23.9	1.4	0.87	22.6	0.06	1.8	0.053	3.49	3.2	112.5	0.04	912	0.25	2.83	14.7	2.2	610	26.1	450			0.15
UNK	69464	Yabba Granite	OUT	532454	5969389	635	DORCHAP	15	PEG_GRAN	PEG_GRAN			20x15m outcrop, striking 308deg. Variable grainsize from 2-20mm. Dominantly 3-12mm. Feldspar, quartz, muscovite. Rare plumerose muscovite. Pervasively weathered	Chip		AD18262536	0.05	8.13	0.5	20	5.81	24.2	0.28		6.9	0.4	4	9.33	2.8	0.69	21.6	0.05	1.6	0.065	3.77	2.8	54.9	0.04	933	0.18	2.77	13.2	0.9	800	31.8	370			0.27
UNK	69465	Yabba Granite	OUT	532508	5969497	622	DORCHAP	13	PEG_GRAN	PEG_GRAN			20x13m outcrop. Striking 336deg. Grainsize varies from -20mm, commonly 4-6mm. Contains quartz, feldspar, muscovite, rare plumerose muscovite.	Chip		AD18262536	0.02	7.79	0.7	20	4.73	3.52	0.26		7.82	0.6	4	11.8	1.1	0.75	21.3		1.3	0.087	3.89	3.4	66.6	0.05	608	0.2	2.43	12.7	1.2	510	34	352			0.09
UNK	69466	Yabba Granite	OUT	532554	5969440	655	DORCHAP	60	PEG_GRAN	PEG_GRAN			Large granite dome approx 50x60m. Grainsize generally 4-5mm. Sample at base. Muscovite, biotite, feldspar, quartz. Moderately weathered	Chip		AD18262536	0.04	7.78	1.1		6.19	4.45	0.32	0.03	6.11	0.4	4	29.1	0.7	0.82	21		1.4	0.07	3.55	2.6	133.5	0.05	651	0.19	2.74	12.6	1	700	28	392			0.22
UNK	69467	Yabba Granite	OUT	532584	5969420	672	DORCHAP	60	PEG_GRAN	PEG_GRAN			Large granite dome approx 50x60m. Same outcrop as 69466. Grainsize generally 4-5mm. Sample at top. Muscovite, biotite, feldspar, quartz. 5-20cm thick pegmatite veins, forming ~5% of the rock. Moderately to strongly weathered	Chip		AD18262536	0.05	7.83	1.5	10	7.38	5.36	0.23		5.96	0.5	4	20.2	0.6	0.82	21	0.05	1	0.074	3.59	2.6	128.5	0.04	450	0.22	2.66	13	0.8	550	28.3	391			0.24
MCRE	69468	Dorchap Peg	EL006486	534249	5943476	977	DORCHAP	5	PEG		PEG		10x5 m subcrop. Large petalite crystals to 250mm, quartz, feldspar and muscovite typiclly 5-20mm. Rare cassidurite elbows. Moderately weathered	Chip		AD18262536	0.03	8.04	3.9	20	112	0.34	0.06		0.75	0.4	4	67.8	0.7	0.39	19.95		1.9		2.39		5390	0.01	300	0.21	2.96	79.5	1.3	1780	13.7	1160			0.1
MCRE	69469	Dorchap Peg	EL006486	534233	5943473	981	DORCHAP	4	PEG	PEG			8x4 m dyke. Large petalite crystals to 250mm, quartz, feldspar and muscovite typiclly 5-20mm. Moderately weathered	Chip		AD18262536		8.72	3.5	10	138	0.32	0.05	0.02	1.04	0.9	5	62.2	1	0.48	22.3		1.6		2.76	0.7	4390		218	0.31	3.56	81.9	2.9	1390	16.4	1240		0.01	0.12
MCRE	69470	Dorchap Peg	EL006486	534238	5943464	990	DORCHAP	10	PEG		PEG		subcrop sampled over a 10m area. Quartz to 80 mm, petalite to 250mm, muscovite to 20mm.	Chip		AD18262536	0.02	8.36	4.2	10	135	0.15	0.06		0.41	0.3	4	67.9	0.4	0.39	17.75	0.05	1.2		2.52		6430		162	0.19	2.72	67.9	0.8	1720	14.1	1160			0.11
MIRE	69471	Dorchap Peg	EL5315	532747	5940402	1307	DORCHAP	40	PEG	PEG			20x40m dyke striking 342deg. Sample collected over 10x10m area. Grainsize ranges from 2-40mm, dominantly 10-15mm. Common tourmaline, quartz, feldspar, muscovite and plumerose muscovite.	Chip		AD18262536	0.12	7.79	30		1.67	1.47	0.17	0.21	3.63	0.4	4	38.7	1.2	0.87	21.1		1.1	0.055	1.8	1.7	149.5	0.03	681	0.26	3.51	18.5	1.5	1450	12.1	290		0.01	0.49
MIRE	69472	Dorchap Peg	EL5315	532733	5940434	1284	DORCHAP	40	PEG	PEG			20x40m dyke striking 342deg. Same as 69471, 69460. Sample collected over 9x4m area in middle on north side of road cutting. Grainsize ranges from 1-20mm, dominantly 4-8mm. tourmaline, quartz, feldspar, muscovite. Strongly weathered. Sediment =048/SW/45	Chip		AD18262536	0.1	8.12	16.4	10	1.86	1.2	0.06	0.05	2.69	0.6	4	20.5	4.1	0.66	19.1		0.8	0.05	3.81	1.4	44.1	0.03	166	0.26	2.68	16.4	2.4	1440	17.3	430			0.23
MIRE	69473	Dorchap Peg	EL5315	532734	5940425	1286	DORCHAP	40	PEG	PEG			20x40m dyke striking 342deg. Same as 69471, 69460, 69472. Sample collected over 9x4m area in middle on north side of road cutting. Grainsize ranges from 1-20mm, dominantly 3-5mm. Abundnt tourmaline, quartz, feldspar, muscovite. pervasively weathered and	Chip		AD18262536	0.11	8.51	12.1	30	1.66	1.52	0.11		6.81	0.5	5	15.45	2.3	0.76	17.85		2	0.04	3.31	3.4	38.4	0.05	151	0.29	3.03	14.7	5	1650	20.5	347		0.01	0.31
MIRE	69474	Dorchap Peg	EL5315	532880	5940541	1264	DORCHAP	1	PEG	PEG			1m wide dyke exposed in road cutting. Exceptionally weathered soft. Quartz, felspar. Feldspars have deteriorated significantly. Iron oxides prevalenent. Grainsize generally 1-5mm. Strike and dip of dyke = 010/E/82. Strike and dip of sediment 320/NE/76	Chip		AD18262536	0.08	9.83	63.2	120	2.15	0.27	0.01	0.02	8.76	6.5	3	10.65	32.4	0.98	18.6		1	0.034	3.35	2.8	36.8	0.21	177	0.7	0.49	8.7	17.1	680	16.1	409		0.01	0.93
MCRE	69475	Dorchap Peg	EL006486	532799	5943289	1340	DORCHAP	5	PEG		PEG		5x5m subcrop. Pegmatite. Grainsize dominantly 20-100mm. Abundant quartz, feldspar, muscovite. Moderately to strongly weathered.	Chip		AD18278881	0.05	9.83	9	50	2.37	0.6	0.06	0.15	1.08	1.1	3	20.6	4	0.73	24	0.05	0.5	0.021	5.08	0.6	38	0.05	1480	0.26	3.14	32.2	2.4	1700	31.8	660			0.08
MIRE	69476	Dorchap Peg	EL5315	532755	5940258	1344	DORCHAP	40	PEG		PEG		40m long area of distributed subcrop and float on side of Hollow Way Road. Grainsize dominantly 4-6mm, but ranges from 1-160mm. Dominated by quartz and feldspar, some tourmaline and muscovite. Possible rare cassiderite	Chip		AD18278881	0.02	7.64	9.3	20	1.64	0.61	0.1	0.06	4	0.8	6	13.35	10	0.93	16.9	0.05	1.1	0.031	3.48	1.9	16.8	0.05	539	0.61	2.93	18.5	2.4	1360	16.9	407			0.11
MIRE	69477	Dorchap Peg	EL5315	532895	5940195	1366	DORCHAP	8	PEG	PEG			20x8m dyke sample across an 8 m area. Apparent strike 260deg. Abundant tourmaline, quartz, feldspar, some muscovite. Grainsize dominantly 3-5mm, ranging from 1-20mm. Gneiss immediately adjacent to dyke. Moderately to strongly weathered.	Chip		AD18278881	0.03	7.62	1.1	40	1.7	0.87	0.11		1.76	0.5	5	9.96	17.2	0.83	20.6		2	0.006	2.95	0.8	15.7	0.04	1250	0.53	3.22	22.8	1.6	1320	18.3	367			0.05
MIRE	69478	Dorchap Peg	EL5315	532903	5940205	1353	DORCHAP	8	PEG	PEG			20x8m dyke sample across an 8 m area. Same dyke as sample 69477. Apparent strike 260deg. tourmaline, quartz, feldspar, muscovite. Grainsize dominantly 10-15mm, ranging from 3-60mm. Gneiss immediately adjacent on east side. Moderately weathered.	Chip		AD18278881	0.03	9.63	4.1	30	2.23	0.48	0.11	0.1	1.34	0.4	3	19.15	10	0.66	24.2	0.06	2.1	0.036	4.52	0.6	16.5	0.03	1300	0.34	3.88	32.5	1.6	1860	28.5	580	0.002		0.06
MCRE	69479	Mt Wills Granite	EL006486	532853	5939699	1338	DORCHAP	1	PEG	PEG			1m dyke. Thin pegmatite dyke within a biotite-tourmaline granite.coarse grained veins approximately 1m wide in granite. Feldspars to 300mm, grainsize dominantly 20-30mm. Abundant tourmaline, feldspar, quartz, muscovite. Some plumerose muscovite. Dkye = 3	Chip		AD18278881	0.05	7.8	2.2	80	0.84	1.68	0.14	0.02	3.96	0.8	5	8.39	10.2	0.78	15.45	0.06	0.3	0.097	5.38	2.1	12.9	0.05	116	0.47	1.76	8.8	1.6	770	49.6	328			0.19
MCRE	69480	Mt Wills Granite	EL006486	532856	5939692	1339	DORCHAP	1	PEG	PEG			Grab sample from pegmatite in granite. Feldspars to 100mm, tourmaline 20mm, muscovite 20+mm. contains mica mineral, brown that forms rounded plates. Moderately to strongly weathered.	Grab		AD18278881	0.05	9.9	1.8	30	1.28	0.65	0.28	0.05	2.22	0.8	4	6.8	14.9	0.85	20.2	0.07	0.6	0.086	3.78	1.3	12.4	0.15	221	0.34	3.29	8	1.3	920	33.6	248		0.01	0.1
MCRE	69481	Dorchap Peg	EL006486	528575	5938694	1056	DORCHAP	6	PEG	PEG			3x6m dyke. Striking 345 deg. Feldspars up to 300mm, grainsize commonly between 10-100mm. Abundant tourmaline, quartz, feldspar, muscovite. Possible petalite. Moderately to strongly weathered.	Chip		AD18278881	0.03	7.46	77.2	30	0.89	0.63	0.07	0.04	1.87	0.6	5	9.23	11.1	0.77	15.3	0.08	0.5	0.025	4.01	1	19.1	0.04	210	0.43	2.41	14.5	2.4	1000	28.7	342		0.01	0.08
MCRE	69482	Dorchap Peg	EL006486	528263	5938609	1093	DORCHAP	20	PEG	PEG			20x20m dyke. Sample from 10x10 area. Abundant tourmaline, quartz, feldspar, muscovite. Grainsize dominantly 5-15mm, ranges from 3-400mm. 10 cm thick quartz veins making up 10% of the outcrop. Strongly weathered	Chip		AD18278881	0.03	8.04	52.8	30	1.24	0.6	0.12	0.02	2.52	0.6	5	13.9	5.9	0.73	17.55	0.06	0.5	0.029	3.52	1.2	18.5	0.05	343	0.45	2.69	18	1.5	860	25.2	304	0.003		0.06
MCRE	69483	Dorchap Peg	EL006486	528262	5938598	1095	DORCHAP	20	PEG		PEG		Subcrop sampled over 20m longdistance at roadside. Granitic pegmatitie. Quartz, feldspar, tourmaline, muscovite. Grainsize 5-100mm, dominantly 10-20mm. Strongly weathered	Chip		AD18278881	0.03	7.32	18.9	30	1.15	0.05	0.1		2.37	0.5	6	10.2	7.3	0.67	15.5	0.06	0.4	0.026	3.71	1.1	12.2	0.04	204	0.42	2.38	15.2	1.8	850	28.7	259			0.05
MCRE	69484	Dorchap Peg	EL006486	528234	5938603	1086	DORCHAP	4	PEG	PEG			Sample dyke as 69482 and 69483. Dyke sampled at northern end over 4m (near storm drain). Feldspars to 250mm. Grainsize 10-250mm, dominantly 10-25mm. Abundnat tourmaline, quartz, feldspar, muscovite. Strongly weathered	Chip		AD18278881	0.03	7.26	152	40	1.47	0.14	0.14	0.05	3.3	0.6	4	9.47	6.4	0.62	18.55	0.09	0.8	0.041	2.39	1.5	12.5	0.05	323	0.4	2.77	20.3	1.6	790	19	226	0.002		0.06
SRE	69485	Dorchap Peg	EL006300	521664	5960795	376	DORCHAP	1	GRN_M	GRN_M			Medium grained with K-feldspar, mica, quartz. Weathered. Boulders (generally 1x1 m exposed). Majority of deposit is subcropping.	Chip		AD18278881		7.79	10.3	40	59.2	2.64	0.12	0.05	1.99	1.9	4	30.3	5.1	0.75	23.6	0.07	1.6	0.023	2.77	1.1	59	0.02	1180	0.48	3.2	53.9	2.3	2060	14.1	550	0.002		0.08
SRE	69486	Dorchap Peg	EL006300	521720	5960788	392	DORCHAP	1	GRN_M	GRN_M			Medium grained with K-feldspar, mica, quartz. Weathered. Boulders (generally 1x1 m exposed). Majority of deposit is subcropping.	Chip		AD18278881	0.03	7.81	2.9	30	60.4	1.24	0.17	0.09	1.2	0.3	3	12.2	4.8	0.46	21.4	0.06	0.7	0.021	2.42	0.6	46.3	0.02	482	0.37	3.43	32.1	1.8	2650	17.1	400			0.06
SRE	69487	Dorchap Peg	EL006300	521730	5961290	447	DORCHAP	1	GRN_M	GRN_M			Medium grained with K-feldspar, mica, quartz. Weathered. Boulders (generally 1x1 m exposed). Majority of deposit is subcropping.	Chip		AD18278881	0.01	7.71	20.3	30	37.6	0.81	0.08	0.97	2.39	2	4	36.5	5.1	0.78	23.1	0.07	1.1	0.019	2.56	2.2	106.5	0.02	928	0.37	3.38	37.5	2.1	3070	16.2	530			0.08
SRE	69488	Dorchap Peg	EL006300	522094	5960822	531	DORCHAP	1	GRN_F	GRN_F			Fine grained aplitic, with K-feldspar, mica, quartz. Weathered. Boulders (generally 1x1 m exposed). Majority of deposit is subcropping.	Chip		AD18278881	0.02	8.05	3.7	30	133.5	0.45	0.26	0.14	2.71	2.1	4	21.5	6.1	0.58	23.2	0.09	0.8		2.23	1.6	97.2	0.02	295	0.36	3.38	45.6	3.6	2030	21.3	310			0.1
MIRE	69489	Dorchap Peg	EL5315	524739	5956913	782	DORCHAP	0.5	GRN_C	GRN_C			Coarse grained boulder (float) identified near stream.	Chip		AD18278881	0.01	8.39	13.2	40	5.49	0.06	0.03		0.89	0.4	3	21.7	6.8	0.51	25.5	0.09	1.7		1.55	0.6	22	0.02	122	0.31	4.23	58.6	3	840	19.6	460			0.4
MCRE	69490	Dorchap Peg	EL006486	529414	5949769	563	DORCHAP	6	PEG_GRAN	PEG_GRAN			Medium grained with K-feldspar, mica, quartz.	Chip		AD18278881		7.69	1.2	150	130.5	0.71	0.62		0.83	0.4	6	31.5	9.4	0.42	22.3	0.06	1.2		1.73	0.5	900	0.03	269	0.47	3.58	125.5	4	8590	74.4	520			0.08
MIRE	69491	Aplite	EL5315	534467	5940812	735	DORCHAP	1	APL	APL			Generally aplitic igneous rock. Some larger feldspar/quartz crystals.	Chip		AD18278881	0.01	7.63	4.4	90	13.9	0.24	0.31		4.33	1.9	7	56.7	9.3	0.8	22.4	0.09	1.6		2.11	2.2	23.8	0.15	317	0.55	2.39	51.1	6.4	2160	10.4	510			0.14
MIRE	69492	Dorchap Peg	EL5315	534240	5940703	770	DORCHAP	2	PEG_GRAN	PEG_GRAN			Medium grained with K-feldspar, mica, quartz.	Chip		AD18278881		8.51	4.5	30	3.87	1.08	0.38		1.7	1.9	4	20.2	8.6	0.88	21	0.08	1.3	0.026	1.42	1	16.7	0.23	364	0.3	4.13	66	5.4	2720	10.4	336		0.01	0.12
MIRE	69493	Dorchap Peg	EL5315	534014	5940653	793	DORCHAP	2	PEG_GRAN	PEG_GRAN			Medium grained with K-feldspar, mica, quartz.	Chip		AD18278881	1.96	7.76	45	190	3.98	1.45	1.14	0.29	5.02	1	5	26.6	49.2	0.72	21.2	0.08	1.8	0.08	1.44	2.5	24.3	0.03	654	0.49	3.91	60.8	3.1	6260	28.4	428		0.03	1.38
	69494	Dorchap Peg
MIRE	69495	Dorchap Peg	EL5315	534010	5940647	788	DORCHAP	2	PEG_GRAN	PEG_GRAN			Medium grained with K-feldspar, mica, quartz.	Chip		AD18278881	0.04	8.46	24.5	20	3.87	0.77	0.26	0.1	0.96	0.6	4	24.3	2.4	0.78	28.1	0.05	0.6	0.024	2.03	0.5	54.1	0.02	1320	0.17	3.36	83.4	2.5	3080	10.4	600			0.06
ERE	69496	Glen Wills Peg	EL006277	548145	5918634	1425	DORCHAP	16	PEG	PEG			Helitarget 463. 16m wide sample transect across dyke. Large dyke, approx 80x12m. Grainsize ranges from 10-300mm, commonly 30-100mm. Abundant quartz and muscovite. Common tourmaline (schorl) and feldspar. Minor blue phosphate minerals. Possible obligonite	Chip		AD18278881		7.73	323	20	2.65	0.38	0.47	0.04	2.89	0.3	5	96.8	4.9	0.85	33.4	0.07	1.5	0.06	1.98	1.3	133	0.07	544	0.32	2.67	175	2	3250	6.3	590		0.01	0.87
ERE	69497	Glen Wills Peg	EL006277	548141	5918664	1426	DORCHAP	14	PEG	PEG			Helitarget 463.14m wide sample transect across dyke. Large dyke, approx 80x12m. Grainsize ranges from 10-300mm, commonly 30-100mm. Abundant quartz and muscovite. Common tourmaline (schorl) and feldspar. Minor blue phosphate minerals. Cassiderite. Possibl	Chip		AD18278881		7.59	56.2	60	4.93	0.95	0.32		2.28	0.3	5	51.7	4.6	0.62	27.4	0.05	1.2	0.015	1.62	1	110	0.04	288	0.31	3.55	71.1	1.9	2610	4	590			0.63
ERE	69498	Glen Wills Peg	EL006277	548132	5918672	1429	DORCHAP	8	PEG	PEG			Helitarget 463. 8x8m sample area at top of dyke. Large dyke, approx 80x12m. Grainsize ranges from 10-300mm, commonly 30-100mm. Abundant quartz and muscovite. Common tourmaline (schorl) and feldspar. Cassiderite. Minor blue phosphate minerals. Possible o	Chip		AD18278881	0.02	7.43	92.4	20	2.36	0.72	0.23		1.7	0.3	4	34.4	10	0.66	23.8	0.06	1.3	0.03	1.43	0.8	10.9	0.05	534	0.4	3.93	43.6	1.8	1750	5.5	350			0.31
ERE	69499	Glen Wills Peg	EL006277	548134	5918603	1415	DORCHAP	14	PEG	PEG			Helitarget 463. Large dyke, approx 80x12m. Grainsize ranges from 1-35mm, commonly 5-15mm. Abundant quartz and muscovite. Common tourmaline (schorl) and feldspar. Muscovite forming large books 50mm thick x150mm long. moderately weathered	Chip		AD18278881		7.69	93.6	20	2.16	0.47	0.26	0.04	1.69	0.3	7	45.3	4.7	0.69	26.3		1.3	0.043	1.71	0.8	40.6	0.04	335	0.36	3.69	64.8	3	1750	5.8	389		0.01	0.46
ERE	69500	Glen Wills Peg	EL006277	547973	5918535	1399	DORCHAP	7	PEG	PEG			East side of outcrop. 7m wide transect. Grainsize ranges from 1-80mm, dominantly 3-15mm. Abundant quartz, muscovite, feldspar, common tourmaline (schorl), cassiderite. Moderately weathered. Quartz veins 2-10cm wide forming % of the outcrop. Sediment co	Chip		AD18278881		7.44	21.3	70	1.49	0.57	0.16	0.07	1.06	0.5	6	17.25	15.4	0.73	22.5	0.09	0.9	0.036	3.18	0.5	6.2	0.06	339	0.41	2.88	60.5	3.1	1580	8.4	490			0.1
ERE	69501	Glen Wills Peg	EL006277	547962	5918535	1394	DORCHAP	7	PEG	PEG			West side of outcrop. 7m wide transect. Grainsize ranges from 1-40mm, dominantly 3-15mm. Abundant quartz, muscovite, feldspar, common garnet, minor tourmaline (schorl), cassiderite. Moderately to strongtly weathered.	Chip		AD18278881		7.44	8.7	30	1.29	1.02	0.14	0.3	1	0.2	4	11.65	11.7	1.02	19.35	0.06	1.5	0.013	2.26	0.5	8.2	0.03	1900	0.44	3.75	46.6	2.5	1750	10.3	359		0.01	0.13
ERE	69502	Glen Wills Peg	EL006277	547980	5918567	1413	DORCHAP	6	PEG	PEG			Top of outcrop. Sampled across 6m transect. Moderately to strongly weathered. Grain size from 5-70mm, dominantly 5-20mm. Abundant quartz, muscovite, feldspar, common tourmaline (schorl).	Chip		AD18278881		7.14	845	30	1.11	7.97	0.14	0.29	1.82	0.4	5	18.45	6.8	0.9	25.8	0.08	1.5	0.03	2.52	0.7	25.2	0.04	1080	0.44	2.72	111.5	1.9	1470	8.2	520		0.02	0.34
ERE	69503	Glen Wills Peg	EL006277	547940	5918518	1391	DORCHAP	8	PEG	PEG			8m wide transect across top of outcrop. Grainsize variable: 1-100mm, commonly 5-20mm. Moderately to strongly weathered. Quartz, muscovite, feldspar, common garnet to 4mm, minor tourmaline (schorl) <3mm).	Chip		AD18278881	0.19	8.52	19.3	60	5.35	0.7	0.13	0.2	0.73	0.2	22	26.5	8.8	0.92	23.6	0.09	0.7	0.06	4.72		8.8	0.04	1120	20	2.59	41.2	81.9	2040	206	790	0.013	0.01	0.12
ERE	69504	Glen Wills Peg	EL006277	547855	5918460	1401	DORCHAP	9	PEG	PEG			Very large pegmatite dyke. Sample collected across 9m sample transect on the upper, west side of the dyke. Estimated 50x120m. Grain size varibale, ranging from 3-400mm, commonly 20-180mm. Large 400mm reasonably common petalite crystals. Quartz, feldspar,	Chip		AD18278881	0.03	7.91	98.3	10	1.7	0.56	0.2	0.03	3.42	0.2	4	29.1	5.9	0.81	18.7	0.08	1.4	0.023	3.07	1.5	12.7	0.05	242	0.44	3.33	21.2	2.2	1870	12.5	530			0.12
ERE	69505	Glen Wills Peg	EL006277	547853	5918469	1398	DORCHAP	9	PEG	PEG			Very large pegmatite dyke. Sample collected across 9m sample transect on the upper, east side of the dyke.Estimated 50x120m. Grain size varibale, ranging from 3-400mm, commonly 20-180mm. Large 400mm reasonably common petalite crystals. Quartz, feldspar,	Chip		AD18278881		8.01	52.9	10	2.51	0.58	0.22	0.1	4	0.2	5	24.3	12.6	1.12	22.6	0.07	2.5	0.026	1.52	1.7	12.4	0.06	785	0.38	3.84	55.4	2	1730	9.4	314		0.01	0.12
ERE	69506	Glen Wills Peg	EL006277	547858	5918484	1396	DORCHAP	2	PEG	PEG			Very large pegmatite dyke. Grab sample concentrated on petalite. Estimated 50x120m. Grain size varibale, ranging from 3-400mm, commonly 20-180mm. Large 400mm reasonably common petalite crystals. Quartz, feldspar, muscovite, tourmaline (schorl). Moderatel	Grab		AD18278881	0.01	9.13	4.7	80	1.14	0.44	0.05		0.27	0.6	3	38.3	5.4	0.38	13.2	0.1	0.1	0.007	7.53		3.9	0.01	93	0.32	2.05	20.1	2	2560	21.2	1280		0.01	0.08
ERE	69507	Glen Wills Peg	EL006277	547864	5918413	1363	DORCHAP	16	PEG	PEG			Very large pegmatite dyke. At lower end of dyke, sample transect across 16m. Estimated 50x120m. Grain size varibale, ranging from 3-400mm, commonly 20-180mm. Large 400mm reasonably common petalite crystals. Quartz, feldspar, muscovite, tourmaline (schorl	Chip		AD18278881	0.03	7.21	48	10	1.12	0.55	0.13	0.17	1.96	0.3	5	19.7	4.5	0.86	15.9	0.07	1.5	0.015	3.64	0.9	12.8	0.03	876	0.4	2.89	13.7	2	1590	13.8	520			0.11
ERE	69508	Glen Wills Peg	EL006277	547880	5918473	1380	DORCHAP	15	PEG	PEG			Very large pegmatite dyke. East side of dyke, mid-way down length, 15m wide transect. Estimated 50x120m. Grain size varibale, ranging from 3-400mm, commonly 20-180mm. Large 400mm reasonably common petalite crystals. Dominantly quartz and feldspar, minor	Chip		AD18278881	0.01	7.63	38.8	80	0.94	0.44	0.15	0.03	1.16	0.6	3	12.75	4.8	0.48	13.9	0.13	0.3	0.018	4.82	0.5	3.7	0.05	74	0.29	2.7	11.2	3.1	1740	17.1	540			0.09
ERE	69509	Glen Wills Peg	EL006277	547750	5918407	1368	DORCHAP	11	PEG	PEG			Sample transect across top of dyke 11m wide. Dyke approximately 11x80m. Grainsize ranges from 1-200mm, dominantly 3-30mm. Dominated by quartz and feldspar. Some muscovite, possible petalite. Common tourmaline (schorl) up to 8mm wide. Moderately weathered	Chip		AD18278881		7.45	23.4	50	0.97	1.91	0.2		1.78	1.8	4	10.25	8.8	0.66	17.6	0.1	0.8	0.053	3	0.8	3.1	0.08	154	0.31	3.06	16.5	2.2	1160	10.4	280			0.07
ERE	69510	Glen Wills Peg	EL006277	547631	5918416	1421	DORCHAP	0.3	PEG				Quartz vein 30 cm thick on lower eastern side of dyke in sediment immediately adjacent to dyke. Minor to common pyrite, usually as small cm clusters.	Grab		AD18278881	0.01	0.29	3.6		0.1	0.25	0.04	0.03	2.34	2.4	6	0.22	2.8	0.52	0.66	0.08	0.1	0.007	0.05	1.1	4	0.04	77	0.4	0.14	0.5	3	190	0.9	4.9		0.01
ERE	69511	Glen Wills Peg	EL006277	547610	5918412	1440	DORCHAP	12	PEG	PEG			12m wide transect across middle of dyke. Grainsize ranges from 1-100mm, dominantly 5-15mm. Quartz, feldspar, muscovite, abundant tourmaline (schorl). Moderately to strongly weathered	Chip		AD18278881	0.01	7.28	35.6	80	1.1	0.67	0.2		6.52	1.2	7	9.24	3.7	1	19.05	0.11	1.1	0.047	2.41	3.1	6.2	0.1	205	0.31	3.08	25.4	2.9	1210	11	271		0.01	0.32
ERE	69512	Glen Wills Peg	EL006277	547569	5918373	1452	DORCHAP	9	PEG	PEG			9x15m dyke. 9m wide transect sampled. Appears to have been previously sampled - looks like grab samples. Grainsize ranges from 0.5-90mm, dominantly 2-5mm. Quartz, feldspar, abundant muscovite, abundant tourmaline (schorl). Moderately to strongly weathere	Chip		AD18278881	0.01	7.33	5.3	40	0.76	0.14	0.18		3.08	0.3	4	18.2	2.1	0.62	18.8	0.08	1.3	0.044	2.57	1.6	5.7	0.06	115	0.27	3.05	26.8	2.6	1000	10	312	0.002		0.05
ERE	69513	Glen Wills Peg	EL006277	547558	5918365	1449	DORCHAP	8	PEG	PEG			10x20m dyke - extension of dyke sampled at 69512 to the west. Sampled across a 8m transect on west side of dyke. Grainsize ranges from 1-60mm, dominantly 2-5mm. Quartz, feldspar, muscovite, abundant tourmaline (schorl). Moderately to strongly weathered	Chip		AD18278881	0.06	7.06	33.2	10	0.98	0.86	0.2	0.11	2.56	0.3	6	15.65	2.4	0.76	15.4	0.06	1.4	0.033	2.7	1.3	12.7	0.04	287	0.29	3.29	10	1.2	1160	15.9	310			0.07
ERE	69514	Glen Wills Peg	EL006277	547267	5918421	1391	DORCHAP	14	PEG_GRAN	PEG_GRAN			14x50m dyke near track. Sample collected across 14m transect at the approximate middle of dyke. Granitic pegmatite. Grainsize ranges from 1-50mm, dominantly 2-5mm. Moderately to strongly weathered. Quartz, feldspar, muscovite, abundant tourmaline (schorl	Chip		AD18278881	0.06	7.13	53.5	10	0.71	1.23	0.16	0.11	2.48	0.3	5	13.65	2.7	0.77	16	0.09	0.8	0.043	3.05	1.2	13.4	0.05	161	0.28	2.94	15.7	1.2	1330	17.6	258		0.01	0.06
ERE	69515	Glen Wills Peg	EL006277	547278	5918708	1436	DORCHAP	5	PEG	PEG			5x5 m dyke above Knocker Track. Grainsize varies from 5-250mm, dominantly 10-35mm. Quartz, feldspar, muscovite. Abundant tourmaline mm diameter. Possible petalite. Quartz veins 10-20cm wide forming approximately 5% of the outcrop. Moderately to strong	Chip		AD18278881	0.03	7.17	17.2	80	2.62	0.47	0.21		2.83	0.9	43	246	2.8	0.69	16.75	0.08	0.9		3.63	1.5	167	0.07	321	0.49	2.46	23.3	20.6	2070	14.7	1070		0.01	1.69
UNK	69516	Mt Wills Granite	OUT	542039	5927649	1296	DORCHAP	5	PEG_GRAN	PEG_GRAN			5X10m dyke sampled across 5m transect. Dyke sectioned in road cut on Omeo Highway. May continue further up hill - abundant float boulders in surrounding area. Sediment contact on west side of dyke 326/SW/75. Moderately weathered. Grainsize varies from 1	Chip		AD18286818	0.01	8.3	12.2	90	5.15	0.34	0.25		2.86	0.6	4	56.5	3.6	0.5	25.1		1.3	0.015	3.54	1.3	71.1	0.05	514	0.15	3.07	59.4	1.4	2300	17.4	940			0.12
UNK	69517	Glen Wills Peg	OUT	543483	5926025	1213	DORCHAP	1.5	PEG_GRAN	PEG_GRAN			1.5m thick granitic pegmatite vein within a larger granite body (approx 10m wide) exposed in road cutting on Omeo highway. Quartz, feldspar, bioite, pyroxene, muscovite? (weathered). Grainsize varies from 1-80mm, dominanlty 5-20mm.	Chip		AD18286818	0.08	8.1	1.7	10	1.04	0.98	0.09	0.06	1.21	0.2	3	25.4	1.7	0.5	16.5		0.3	0.021	5.71	0.6	77.1	0.03	121	0.18	2.33	17.3	0.9	1470	25	760			0.09
ERE	69518	Glen Wills Peg	EL006277	546249	5923048	1179	DORCHAP	12	PEG_GRAN	PEG_GRAN			Weathered granitic pegmatite in road cutting on omeo highway sampled over a 12m wide transect. Dyke is 12x20m. Sediment contact on east side 317/SW/45. Quartz, feldspar. Feldspar typically weathered to clay. Quartz typically 5-20mm. Exceptionally weather	Chip		AD18286818	0.03	7.17	4.5	30	2.21	0.6	0.06		2.59	0.9	3	38.4	2.6	0.35	22.5		1.8		1.55	1.6	266	0.03	315	0.18	3.87	38.6	3.4	950	23.6	660			0.06
ERE	69519	Glen Wills Peg	EL006277	543270	5919983	872	DORCHAP	7	PEG	PEG			7x20m dyke, sampled across 7 m. Grainsize from 5-100mm, commonly 10-40mm. Quartz, fledspar, muscovite. Muscovite books upto 50mm thick. Moderately to strongly weathered. Rare small mm cassiderite. Workings on western side.	Chip		AD18286818	0.02	7.96	3.9	50	5.02	0.6	0.04		2.99	0.9	3	33.6	2.6	0.55	25.6		1.3	0.014	3.28	1.9	25.3	0.03	521	0.19	2.93	82.8	1.7	1280	15.8	750			0.06
ERE	69520	Quartz blow	EL006277	543818	5918648	1244	DORCHAP	5	QTZ				Area of moderately abundant quartz float. Grab sample from multiple blocks showing common pyrite. Typically ~95% quartz of greater.	Grab		AD18286818	0.03	0.3	4.4	10	0.14	0.48	0.01		1.29	0.5	6	0.22	3.2	0.5	0.9				0.06	0.5	2.8	0.05	87	0.42	0.03	0.2	1.6	20	1.3	3.9			0.05
ERE	69521	Quartz blow	EL006277	543825	5918642	1248	DORCHAP	1	QTZ				Area of moderately abundant quartz float. Grab sample from multiple blocks showing common pyrite. Typically ~95% quartz of greater.	Grab		AD18286818	0.03	0.62	5.2		0.27	3.36	0.01		3.03	0.5	8	0.15	3.5	0.67	1.97		0.1	0.008	0.02	1.7	3.8	0.12	93	0.4	0.06	0.1	1.4	10	1.5	2		0.01	0.06
ERE	69522	Gneiss	EL006277	543772	5918497	1287	DORCHAP	20	GRN_M		GRN_M		20x20m subcrop. Sampled over 15m. Grainsize 1-15mm, dominantly 5mm. Granite. Quartz, fledspar, biotite. Approx 30% biotite up to 15 mm diameter. Quartz abundant, minor feldspar. Moderately weathered.	Chip		AD18286818	0.05	7.18	5.8	430	1.14	1.61	0.2		46.8	6.4	23	16.45	4.6	2.02	17.5	0.08	1.8	0.055	3.55	23.8	47	0.51	234	0.2	0.76	11.8	11.6	750	32.9	222			0.15
ERE	69523	Gneiss	EL006277	543771	5917463	1324	DORCHAP	30	GRN_M		GRN_M		30x60m subcrop comprosed of boulders 0.2-1m diameter. Sampled over 20m. Grainsize consisently 2-5mm. Granite. Quartz, fledspar, biotite. Approx 30% biotite up to 15 mm diameter. Quartz abundant, minor feldspar. Large scattered feldspars upto 60mm diamete	Chip		AD18286818	0.03	7.56	1.7	370	1.14	1.69	0.25	0.02	48.9	6	37	20.9	8.9	2.2	18.95	0.07	2.2	0.092	3.64	24.7	33.5	0.53	255	8.17	1.03	16.5	46.9	520	33	274	0.008		0.06
ERE	69524	Andesite	EL006277	543787	5917513	1323	DORCHAP	7	AND	AND			Andesite at helitarget 481. 7x14m. Fine grained, homogenous, mm grainsize. Quartz, feldspar, hornblende, pyroxene?	Chip		AD18286818	0.04	8.53	2.3	80	0.52	0.07	6.52	0.07	14.25	42.9	124	6.25	46.9	6.5	16.25	0.1	2.4	0.063	0.43	4.9	40.3	4.65	1260	0.2	2.28	1.6	74.6	590	4.4	31.4		0.06	0.69
ERE	69525	Gneiss	EL006277	543792	5917509	1322	DORCHAP	10	GRN_M			GRN_M	Granite/Gneiss float from around andesite. Very altered. Quartz, feldspar, biotite. Very white, chalky appearance. Quartz and bitoite up to 5mm. Collected from a 10x10 area.	Grab		AD18286818	0.02	7.9	1.6	600	1.08	1.56	0.15		45.6	4.9	20	7.77	4.8	1.22	20.4	0.08	1.7	0.04	3.52	27.5	22	0.31	251	0.12	0.44	7.4	9.4	330	25.9	182			0.05
ERE	69526	Quartz blow	EL006277	543806	5917508	1326	DORCHAP	4	QTZ				Quartz float with trace pyrite. Quartz float concentrated uphill from andesite dyke. Trace amounts of muscovite in quartz.	Grab		AD18286818	0.02	0.35	4.2	20	0.12	0.55	0.01		0.76	2	6	0.32	4.5	0.54	0.7				0.21	0.5	2.2	0.02	82	0.37	0.05	0.2	5.8	30	2.9	9.2			0.12
ERE	69527	Quartz blow	EL006277	543775	5917533	1318	DORCHAP	20	QTZ				Quartz float collected across a 20x20m area. Minor muscovite, and common pyrite. Float occurs as 5-20mm blocks	Grab		AD18286818	0.03	0.95	8.9	40	0.51	3.42	0.06		2.85	9.1	6	0.34	2.9	0.89	2.39		0.1	0.007	0.25	1.5	6.7	0.15	97	0.36	0.13	0.2	12.8	50	3.1	10.1		0.01	0.53
ERE	69528	Gneiss	EL006277	543777	5917542	1318	DORCHAP	5	GNEISS				Very altered sediment (Gneiss) adjacent to dyke intrusion. Quartz, occasional feldspar, large abundant biotite to 15mm. Dominant grainsize 2-3mm. Collected over a 5x5 m area	Chip		AD18286818	0.02	3.76	1.1	320	1.41	1.2	0.03		28.1	4.8	25	7.17	6.9	1.36	8.47	0.05	0.9	0.029	1.62	15.2	20.5	0.34	342	0.67	0.24	5	11.5	100	14.7	110
ERE	69529	Quartz blow	EL006277	543828	5917532	1333	DORCHAP	5	QTZ				Quartz float collected across a 5x5m area. common pyrite. Float occurs as 5-20mm blocks	Grab		AD18286818	0.08	1.18	2	50	0.57	4.41	0.03		7.14	0.8	9	0.4	5.4	0.89	3.51		0.2	0.016	0.18	4.4	3.5	0.2	136	0.72	0.08	0.5	2.8	60	3	8.5			0.06
ERE	69530	Quartz blow	EL006277	543745	5917531	1308	DORCHAP	0.5	QTZ				single quartz float block 30 cm long. common pyrite and vugs of yellow sulphurous material. Minor additional vugs containing orange powdery rust	Grab		AD18286818	0.02	0.23	23.6	20	1.39	1.27			2.07	34.1	10	0.22	1	2.33	0.62				0.1	1	22.5	0.01	70	0.34	0.02	0.1	27	130	4.3	3.4		0.29	3.52
ERE	69531	Quartz blow	EL006277	543852	5917516	1326	DORCHAP	1	QTZ				Quartz float from 1m area. Common pyrite and vugs of yellow sulphurous material. Minor additional vugs containing orange powdery rust. Limonite and Mn coatings in some places	Chip		AD18286818	0.07	0.05	1.3		0.08	0.7	0.01		0.29	1.2	9	0.2	6	0.83	0.25				0.01		1.1		92	0.51	0.01	0.1	3.9	20	1	0.9		0.02	0.06
ERE	69532	Quartz blow	EL006277	543754	5917508	1316	DORCHAP	10	QTZ				Quartz float collected from across granitic outcrop. Sampled over 10X5m area. Abundnant pyrite.	Chip		AD18286818	0.06	0.57	19.8	10	0.31	7.33	0.02		3.27	4.6	7	0.18	6.6	0.71	1.71		0.1	0.013	0.07	1.6	4.4	0.1	88	0.4	0.04	0.2	6.9	40	2.3	3.6		0.01	0.39
ERE	69533	Quartz blow	EL006277	543722	5917400	1316	DORCHAP	4	QTZ				100m south of helitarget 481. Large quartz reef approx 100x10 m narrowing to 4m at the top and bottom. Abundant pyrite in clusters and vugs, with minor muscovite. Sample collected across 4m at top of dyke (near road). ~80% quartz, common to abundnat vugs	Chip		AD18286818	0.02	1.36	148	40	1.12	4.1	0.01		34	8.1	13	0.81	20	6.95	5.38	0.06	0.5	0.009	0.56	19	14.9	0.05	56	0.57	0.02	2	3.2	530	4.4	37.8		0.03	5.04
ERE	69534	Quartz blow	EL006277	543712	5917414	1311	DORCHAP	12	QTZ				100m south of helitarget 481. Large quartz reef approx 100x10 m narrowing to 4m at the top and bottom. Abundant pyrite in clusters and vugs, with minor muscovite. Sample collected across 12m, 15m below previous sample. ~80% quartz, common to abundnat vug	Chip		AD18286818	0.02	2.26	124	30	1.47	1.92	0.01		35.3	6.9	11	1.76	11.2	3.84	8.97	0.06	0.6	0.026	0.94	18.8	19.9	0.08	75	0.71	0.03	3.9	3.5	300	2.1	69.3		0.02	4.58
ERE	69535	Quartz blow	EL006277	543697	5917421	1304	DORCHAP	12	QTZ				100m south of helitarget 481. Large quartz reef approx 100x10 m narrowing to 4m at the top and bottom. Sample collected across 12m ransect approx 16 m below previous sample. Edge of dyke marked by moderately to strongly weathered, granular (2-3mm), weakl	Chip		AD18286818	0.02	0.81	77.6	10	1.56	2.3			7.08	24.2	7	0.6	14.3	3.49	3.17		0.2	0.006	0.31	3.7	24.6	0.02	67	0.48	0.02	1.4	15.7	130	1.4	21.3		0.57	5.28
ERE	69536	Quartz blow	EL006277	543692	5917417	1303	DORCHAP	3	QTZ				Grab sample from 3m wide vein. 3m thick quartz vein in the centre of the reef has up to 5cm pyrite masses showing a brassy colour when fresh. Pyrite forms upt o 30% of the vein. Pyrite occurs throughout the outcrop as clusters, bands/striations and void	Grab		AD18286818	0.01	0.24	18.5		1.43	0.9	0.01		3.46	104	7	0.2	2.3	3.09	0.63		0.1		0.06	1.7	26.9	0.01	69	0.36	0.02	0.4	73.8	10	1.7	3.7		2.59	4.58
ERE	69537	Quartz blow	EL006277	543675	5917423	1299	DORCHAP	7.5	QTZ				100m south of helitarget 481. Large quartz reef approx 100x10 m narrowing to 4m at the top and bottom. Abundant pyrite in clusters and vugs, with minor muscovite. Sample collected across 7.5m transect, 18m below previous sample. ~80% quartz, common to ab	Chip		AD18286818	0.04	0.97	81.2	10	1.68	53.8			14.7	11	12	0.84	9	4.74	3.66	0.05	0.4	0.01	0.36	7.6	25.4	0.03	59	0.71	0.02	2.2	6	400	3.6	26.1		0.06	5.45
ERE	69538	Quartz blow	EL006277	543665	5917428	1293	DORCHAP	9	QTZ				100m south of helitarget 481. Large quartz reef approx 100x10 m narrowing to 4m at the top and bottom. Abundant pyrite in clusters and vugs, with minor muscovite. Sample collected across 9m transect, 15m below previous sample. ~80% quartz, common to abun	Chip		AD18286818	0.02	1.17	281	20	1.11	26.3			15.6	14.6	12	0.91	49.2	7.4	4.72	0.06	0.3	0.017	0.47	8.4	14.7	0.04	51	0.52	0.02	0.9	5	780	5.3	36.7		0.04	4.93
ERE	69539	Quartz blow	EL006277	543658	5917429	1287	DORCHAP	4	QTZ				100m south of helitarget 481. Large quartz reef approx 100x10 m narrowing to 4m at the top and bottom. Abundant pyrite in clusters and vugs, with minor muscovite. Sample collected across 4m transect, 15m below previous sample. Lower proportion of quartz	Chip		AD18286818	0.02	0.97	106.5	30	1.48	5.31			16.05	10.3	12	0.65	9.8	4.91	3.46	0.05	0.3	0.009	0.38	8.5	24.1	0.03	70	0.48	0.02	1.6	4.4	590	3.8	25.6		0.05	5.17
ERE	69540	Quartz blow	EL006277	543632	5917447	1279	DORCHAP	6	QTZ				100m south of helitarget 481. Large quartz reef approx 100x10 m narrowing to 4m at the top and bottom. Abundant pyrite in clusters and vugs, with minor muscovite. Sample collected across 6m transect, 18m below previous sample. Lower proportion of quartz	Chip		AD18286818	0.02	1.84	56.5	30	1.36	6.89	0.01		63	3.8	18	1.37	12.3	4.6	8.22	0.1	0.8	0.011	0.77	31.4	16.3	0.07	69	0.62	0.02	3.4	2.8	500	3.5	56.3		0.02	3.79
UNK	69541	Glen Wills Peg	OUT	544241	5921122	913	DORCHAP	26	PEG	PEG			26m long dyke sampled across 26m in road cutting on Omeo Highway in Glen Valley north of cemetery. Moderateky to well weathered. Grainsize varies between 3-40mm, dominantly 10-20mm. Quartz, fledspar, muscovite, common tourmaline (schorl).	Chip		AD18286818	0.07	7.61	79.5	60	3.18	1.52	0.04		3.32	0.5	4	24.5	7	0.69	22.3		1.5	0.077	2.97	1.7	19.5	0.03	314	0.25	2.75	52	1.6	1220	11.2	610		0.01	0.18
ERE	69542	Glen Wills Peg	EL006277	547207	5920113	1365	DORCHAP	16	PEG	PEG			16m wide dyke in road cutting sampled across 16m transect. Moderately to strongly weathered. Grainsize 3-100mm, commonly 20-80mm. Quartz, abundant feldspar, muscovite. Common small tourmaline (schorl, <4mm). Occasional garnet.	Chip		AD18286818	0.07	7.28	11.1	50	1.12	0.98	0.07		7.33	1.9	6	11.5	9	0.64	19.85		1.4	0.051	2.55	3.8	12.3	0.06	214	0.25	2.31	22.2	2.4	1770	9.8	348			0.17
ERE	69543	Glen Wills Peg	EL006277	547152	5920076	1390	DORCHAP	25	PEG	PEG			Approximately halfway up same dyke as previous sample. 25m wide transect. Moderately to strongly weathered. Variable grainsize from 2-200mm, dominantly 2-40mm. Quartz, feldspar, muscovite, possible petalite, minor muscovite. Common garnet and common tour	Chip		AD18286818	0.04	7.37	9	20	0.81	0.56	0.09	0.09	1.71	0.5	5	16.1	1.4	0.74	17.65		0.7	0.049	3.79	0.7	8.5	0.03	470	0.26	2.52	11.1	1.4	1370	12.3	470			0.12
ERE	69544	Glen Wills Peg	EL006277	547125	5920045	1407	DORCHAP	18	PEG	PEG			18m wide transect sampled at top dyke sampled at 69542 and 69543. Grainsize ranges from 2-400mm, dominantly 5-20mm. Quartz, feldspar, possible petalite. Common muscovite, common tourmaline, minor garnet. 5-10cm thick quartz veins, % of outcrop.	Chip		AD18286818	0.03	7.69	13	30	0.98	1.16	0.08		1.12	0.4	6	22.6	6.7	0.93	27.6		0.5	0.121	3.65	0.5	14.4	0.03	741	0.47	2.18	38.3	2	1240	9.2	650			0.11
ERE	69545	Glen Wills Peg	EL006277	547339	5920008	1341	DORCHAP	18	PEG	PEG			36m wide dyke in road cutting. East (69545) and west (69547) sides of dyke sampled as two 18m transects. East Transect - Strongly weathered pegmatite. Quartz, feldspar, muscovite. Common to abundant tourmaline. Grainsize ranges from 2-40mm, dominantly 5-	Chip		AD18286818	0.01	7.04	5.5	40	0.94	0.82	0.07		2.96	0.7	5	11.85	4.1	0.6	16.6		0.4	0.065	4.11	1.7	9.4	0.05	99	0.25	1.8	12.9	1.5	920	21.1	370			0.11
ERE	69546	Quartz blow	EL006277	547329	5920005	1340	DORCHAP	1	QTZ				Approximate centre of dyke. Grab sample from quartz vein 10-50cm thick. Small cm vugs filled with ex-sulphide boxwork and limonite.	Chip		AD18286818	0.03	0.52	7.5		0.16	0.83			0.7	0.7	10	0.99	5.3	1.02	1.51		0.1	0.013	0.21		4.7	0.01	219	1.22	0.08	1.4	3	80	3.3	24			0.18
ERE	69547	Glen Wills Peg	EL006277	547330	5920021	1342	DORCHAP	18	PEG	PEG			36m wide dyke in road cutting. East (69545) and west (69547) sides of dyke sampled as two 18m transects. West Transect - Strongly weathered pegmatite. Quartz, feldspar, abundant muscovite, abundant tourmaline. Grainsize ranges from 1-120mm, dominantly 5	Chip		AD18286818	0.02	6.98	6.7	30	0.88	4.23	0.09		3.97	1	6	8.67	2.8	0.76	18.25		1.1	0.089	2.45	1.9	13.9	0.06	147	0.4	2.47	16.5	2.7	840	10.5	256			0.15
ERE	69548	Glen Wills Peg	EL006277	547249	5920002	1369	DORCHAP	6	PEG	PEG			Top of dyke sampled in samples 69455, 69546, and 69547. Sampled across a 6x6m area. Strongly weathered. Grainsize 2-350mm, dominanlty 5-25mm. Quartz, feldspar, muscovite. Common tourmaline (schorl), possible petalite. Common garnet.	Chip		AD18286818	0.04	7.46	11.1	40	1.12	1.08	0.11	0.05	2.11	0.4	3	17.4	2.8	0.65	17.75		1.2	0.034	4.02	0.9	10.8	0.03	701	0.23	2.58	30.7	1.2	1460	16.2	470			0.12
ERE	69549	Glen Wills Peg	EL006277	547825	5919968	1270	DORCHAP	4	GRN_M	GRN_M			very weathered granite outcrop exposed in road cutting. Quartz and feldspar. Dominanlty 4-7mm, some feldspars to 100mm across, quartz to 20mm. Most feldspar severly degraded and clay-like.	Chip		AD18286818	0.08	8.68	1.4	100	1.36	0.45	0.01		11.35	7.3	3	23.1	7.5	0.5	24.3	0.11	1	0.085	3.92	38	11.6	0.06	143	0.15	0.17	33.3	26.7	640	10.3	580			0.08
ERE	69550	Glen Wills Peg	EL006277	548344	5920320	1265	DORCHAP	8	PEG	PEG			8x20m outcrop of pegmatite. Sampled across 8m. Common tourmaline (schorl) up to 5x20cm. Quartz up to 250mm, feldspar to 300mm, abundant muscovite to 100mm. Quartz, muscovite and tourmaline domninant. Moderately weathered. Possible spodumene crystals upto	Chip		AD18286818	0.02	7.79	62.8	40	1.88	0.47	0.09	0.05	1.05	0.9	5	34.8	4.5	1.01	30.6	0.11	0.8	0.119	3.47	0.7	21.1	0.06	897	0.33	2.12	56.3	2.7	1180	9.7	750			0.1
ERE	69551	Glen Wills Peg	EL006277	549065	5921551	1114	DORCHAP	10	PEG	PEG			18x30m dyke sampled across 10m transect. Striking 320 degrees. 10-400mm crystals, dominantly 20-100mm. Dominantly quartz (~60%), common muscovite to 50mm, less abundant feldspar. Quartz veins to 2cm wide, forming 1% of outcrop. Possible petalite.	Chip		AD18286818	0.02	6.59	2.1	20	3.48	0.16	0.51		2.4	1.1	5	46.3	1.1	0.56	19.35	0.07	0.6		1.42	1.3	7.1	0.05	160	0.23	2.97	53.1	1.5	3360	3.3	384
ERE	69552	Glen Wills Peg	EL006277	548492	5920667	1234	DORCHAP	18	PEG	PEG			Transect at top of large dyke approx 120x40m. Transect over 18m. Sediment contact on east side 340/SW/80. Grainsize ranges from 2-250mm, dominantly 10-40mm. Quartz, feldspar, abundant muscovite. Possible petalite. Tourmaline (schorl) <3mm common on west	Chip		AD18286818	0.02	7.39	128.5	10	3.35	0.83	0.22		1.58	0.7	4	81.2	1.5	0.68	26.8	0.11	2	0.048	3.15	1.2	29.8	0.02	394	0.27	2.68	81.6	2	2290	6	970			0.19
ERE	69553	Glen Wills Peg	EL006277	547000	5920300	1381	DORCHAP	15	PEG_GRAN	PEG_GRAN			Granitic pegmatite in road cutting. Approximately 40m long, sampled over 15m. Quartz, feldspar, muscovite, common tourmaline (schorl). Grainsize 1-40mm, dominantly 5-15mm. Moderately to strongly weathered. Strongly weathered outside of sampled zone	Chip		AD18286818	0.07	7.54	3.4	60	1.04	0.84	0.08	0.02	6.01	1.3	5	12.95	3	0.7	18.75	0.14	0.6	0.078	4.06	7.1	12	0.06	142	0.25	1.97	15.2	3.2	1010	15	392			0.09
ERE	69554	Glen Wills Peg	EL006277	547455	5921199	1284	DORCHAP	16	PEG	PEG			Bluejacket dyke. Sample transect 15m wide across adit/trench below road. Quartz, feldspar and muscovite common. Minor lepetelite and obligonite. (sample includes two fust-sized pieces of lepetilite and obligonite). Feldspars to 900mm, quartz to 200mm, mu	Chip		AD18286818	0.06	7.63	24	20	5.38	0.37	0.18		1.8	0.5	6	500	1.1	0.7	36.8	0.12	0.9	0.037	3.12	1	1470	0.05	365	0.23	1.9	84	1.3	1920	5.3	1990			0.47
ERE	69555	Glen Wills Peg	EL006277	547494	5921174	1292	DORCHAP	12	PEG	PEG			Bluejacket dyke. Sample transect through road cutting done as two 12m wide transects west (69555) and east (69556). West side - feldspars to 400mm, quartz to 150mm, muscovite to 40mm. Grainsize dominantly 10-50mm. Rare tourmaline mm. Moderately to stro	Chip		AD18286818	0.04	8.06	3.1	40	3.59	0.19	0.2		2.67	1.1	5	172	2.3	0.56	22.4	0.12	1	0.01	3.57	1.5	71.4	0.03	140	0.29	3.33	95.8	2.6	3100	9.3	1020			0.34
ERE	69556	Glen Wills Peg	EL006277	547508	5921182	1292	DORCHAP	12	PEG	PEG			Bluejacket dyke. Sample transect through road cutting done as two 12m wide transects west (69555) and east (69556). East side - feldspars to 400mm, quartz to 150mm, muscovite to 40mm. Grainsize dominantly 10-50mm. Rare tourmaline mm. Moderately to stro	Chip		AD18286818	0.09	7.67	25.2	30	2.76	0.78	0.16		1.52	1.1	5	64.8	4.8	0.77	26.8	0.11	0.7	0.077	2.7	1	90	0.07	214	0.37	2.92	100	2.6	2040	9.1	650			0.42
ERE	69557	Glen Wills Peg	EL006277	547383	5921462	1211	DORCHAP	6	PEG	PEG			Below Bluejacket dyke. 6m wide dyke exposed in road cutting. Sampled across 6m. Feldspars up to 200mm, quartz to 80mm, muscovite to 35mm. Possible green tourmaline/dark mineral - not ID'd. Strongly weathered. Possible obligonite.	Chip		AD18286818	0.02	6.96	13.7	80	1.72	3.34	0.08		4.64	1.5	9	14.15	5.3	1.32	18.65	0.13	0.4	0.054	2.67	2.8	13	0.15	95	0.32	2.65	44.7	2.6	1280	7.6	343		0.01	0.11
ERE	69558	Glen Wills Peg	EL006277	547389	5921464	1210	DORCHAP	10	PEG			PEG	Below Bluejacket dyke. Float collected from roadside over 8m at same site as 69557. Feldspars up to 200mm, quartz to 80mm, muscovite to 35mm. Possible green tourmaline/dark mineral - not ID'd. Strongly weathered. Possible obligonite.	Chip		AD18286818	0.02	7.59	14.6	20	2.29	1.82	0.08		3.5	1.4	10	14.95	3.2	1.26	23	0.09	0.5	0.068	1.3	1.8	12.1	0.18	207	0.85	3.72	84.8	3.9	1230	6.9	255			0.12
ERE	69559	Glen Wills Peg	EL006277	547437	5921851	1194	DORCHAP	8	PEG	PEG			8m wide dyke exposed in road cutting. Strongly weathered. Quartz to 200mm, feldspar to 80mm, muscovite to 60mm, tourmaline to 5x50mm. Tourmaline (schorl) abundant. Quartz, feldspar, muscovite possible obligonite. Grainsize dominantly 10-40mm.	Chip		AD18286818	0.03	7.58	33.3	60	1.76	1.78	0.04		2.78	1.6	5	16.55	10.1	0.85	22.5	0.1	0.8	0.068	2.82	2.3	22.7	0.12	201	0.33	2.41	222	2.8	1160	7.1	470			0.07
ERE	69560	Glen Wills Peg	EL006277	547414	5922008	1182	DORCHAP	8	PEG_GRAN	PEG_GRAN			8m wide dyke in road cutting. Grainsize 1-200mm, dominantly 2-5mm. 1cm banding of minerals evident. Strike and dip of dyke = 225/W/80. Granitic pegmatite. Quartz, feldspar, muscovite, common tourmaline (schorl). Feldspars to 300mm.	Chip		AD18286818	0.06	7.84	417	40	2.07	1.29	0.07		4.58	1	5	36.4	2.3	0.83	21.7	0.12	1.4	0.084	3.85	3.1	23.5	0.05	262	0.29	2.41	47.2	2.2	1170	14.2	520		0.01	0.25
ERE	69561	Glen Wills Peg	EL006277	547636	5921179	1301	DORCHAP	8	PEG	PEG			Dyke 100m east of Bluejacket. Approximately 12X40m. Sampled over 8m on west side of dyke. Grainsize 2-240mm, dominantly 10-60mm. Quartz, feldspar, muscovite. Moderately to strongly weathered.	Chip		AD18286818	0.08	7.94	11	30	3.92	0.29	0.15		1.16	0.5	4	133	2.5	0.57	29.9	0.14	2	0.065	4.01	0.7	84.5	0.03	185	0.21	2.38	105.5	1.8	2290	10	1130			0.57
ERE	69562	Glen Wills Peg	EL006277	547634	5921185	1299	DORCHAP	6	PEG	PEG			Dyke 100m east of Bluejacket. Approximately 12X40m. Sampled over 6m on east side of dyke. Grainsize 2-240mm, dominantly 10-60mm. Quartz, feldspar, muscovite. Common tourmaline, some with a dark blue hue. Rare blue phosphate minerals with common garnet to	Chip		AD18286818	0.05	8.12	3	20	3.2	0.15	0.16		1.17	0.6	5	131	1.8	0.83	32.1	0.13	3.1	0.04	3.34	0.5	89.7	0.03	1020	0.28	2.8	98.9	1.6	2100	10	1070			0.48
ERE	69563	Glen Wills Peg	EL006277	547603	5921197	1302	DORCHAP	12	PEG	PEG			Dyke 100m east of Bluejacket. Approximately 12X40m. Top of dyke sampled over 12m. Grainsize 2-600mm, dominantly 5-60mm. Quartz, feldspar, muscovite. Common tourmaline, some with a dark blue hue. Rare garnet to 6mm. Most tourmaline is schorl. strongly w	Chip		AD18286818	0.04	7.8	13.8	30	3.58	0.94	0.17		1.25	0.7	5	105.5	1.8	0.76	29.7	0.12	1.7	0.045	2.96	0.6	81.2	0.05	246	0.24	2.65	164	1.3	1930	7.4	980			0.28
SRE	69564	Dorchap Peg	EL006300	521909	5956005	475	DORCHAP	10	PEG		PEG		10x15m dyke. Dominantly subcropping. Sampled over 10m. Grainsize varies from 1-250mm, dominantly 5-40mm. Quartz, feldspar, muscovite, abundant tourmaline. Common garnet in fine fraction. Moderately to strongly weathered.	Chip		AD18286818	0.08	7.22	71.9	10	13.1	0.92	0.16	0.24	1.36	0.2	4	38.1	1.2	0.69	20.8	0.11	2.3	0.036	2.31	0.6	51.8	0.02	959	0.27	3.42	63.2	1.2	1660	9.1	570			0.16
SRE	69565	Dorchap Peg	EL006300	521909	5956020	478	DORCHAP	11	PEG	PEG			11x15m dyke. Sampled over 11m. Grainsize varies from 1-250mm, dominantly 5-40mm. Quartz, feldspar, muscovite, abundant tourmaline. Common garnet in fine fraction. Moderately to strongly weathered.	Chip		AD18286818	0.08	8.49	30.7	30	3.41	0.61	0.12	0.07	1.29	0.3	5	56.8	2.1	0.73	18.7	0.17	1.2	0.027	4.56	0.6	21.2	0.01	555	0.31	3.79	18.6	1.6	1930	13.7	790			0.21
SRE	69566	Dorchap Peg	EL006300	521832	5956133	532	DORCHAP	8	PEG	PEG			8x15m dyke. South end of dyke sampled over 8m. Grainsize varies from 2-100mm, dominantly 5-20mm. Quartz, feldspar, muscovite, common tourmaline. Dyke striking 340 deg. Moderately to strongly weathered.	Chip		AD18286818	0.07	8.05	46.6	40	3.29	1.97	0.07	0.06	1.67	0.4	5	58.2	1.6	0.67	22.7	0.15	1.3	0.048	3.72	0.9	65.5	0.03	658	0.32	3.05	28.4	1.4	1400	13.1	760			0.5
SRE	69567	Dorchap Peg	EL006300	521803	5956135	524	DORCHAP	7	PEG	PEG			8x30m dyke. South end of dyke sampled over 7m. Grainsize varies from 2-180mm, dominantly 10-40mm. Quartz, feldspar, muscovite, abundant tourmaline. Moderately to strongly weathered.	Chip		AD18286818	0.04	7.85	18.5	40	2.14	0.57	0.08	0.09	3.43	0.6	6	18.75	1.9	1.03	18.15	0.15	2.2	0.036	3.94	1.6	24.4	0.03	1640	0.34	2.79	14.5	2	1500	18.7	610			0.12
SRE	69568	Dorchap Peg	EL006300	521794	5956146	525	DORCHAP	8	PEG	PEG			8x30m dyke. North end of dyke sampled over 8m. Grainsize varies from 2-180mm, dominantly 10-40mm. Quartz, feldspar, muscovite, abundant tourmaline. Moderately to strongly weathered.	Chip		AD18286818	0.02	7.42	11.4	20	2.79	0.56	0.05		2.4	0.8	5	28.5	2.4	0.88	23	0.14	1.5	0.047	2.68	1.2	30.7	0.03	733	0.29	2.88	28.3	3.6	970	10.8	610			0.15
SRE	69569	Dorchap Peg	EL006300	521779	5956108	498	DORCHAP	5	PEG	PEG			12x20m dyke. Sampled over 12m. Grainsize varies from 0.5-100mm, dominantly 5-15mm. Quartz, feldspar, muscovite, common tourmaline. Faint blue colour to occasional tourmalines? occasional garnet mm diameter. Moderately to strongly weathered.	Chip		AD18286818	0.09	7.73	41.5	10	4.96	0.82	0.1		1.37	0.2	3	87	1.9	0.66	22.6	0.12	1.9	0.028	2.35	0.6	46.9	0.02	1160	0.17	3.57	28.5	0.9	1530	9.3	560			1
MIRE	69570	Dorchap Peg	EL5315	523912	5959631	827	DORCHAP	12	PEG	PEG			12x20m dyke. Sampled over 12m. Grainsize varies from 2-200mm, dominantly 10-30mm. Quartz, feldspar, muscovite. Moderately to strongly weathered.	Chip		AD18286818	0.06	6.7	7.8	50	87.7	0.21	0.09		2.67	1	4	30.7	1.2	0.57	20.6	0.11	1		2.17	1.8	127.5	0.03	334	0.19	2.11	64.1	2.9	1010	17.6	470			0.08
MIRE	69571	Dorchap Peg	EL5315	523893	5959647	826	DORCHAP	9	PEG	PEG			9x15m dyke. Sampled over 12m. Grainsize varies from 2-200mm, dominantly 10-30mm. Sediment contact striking 320deg. Quartz, feldspar, muscovite. Moderately to strongly weathered.	Chip		AD18286818	0.05	7.86	45.1	30	80.9	0.27	0.1		1.26	1.3	4	21.4	1.8	0.61	20.2	0.11	1.1		2.06	1.2	71.9	0.02	230	0.28	3.78	65.3	3.3	1090	23.8	381			0.1
MIRE	69572	Dorchap Peg	EL5315	526991	5949736	721	DORCHAP	5	PEG	PEG			Approximately 10 x 50m dyke. Sampled over 5m at top of dyke. Grainsize varies from 0.5-100mm, dominantly 1-15mm. Quartz, feldspar, muscovite. Moderately to strongly weathered. Striking 292deg.	Chip		AD18286818	0.05	7.86	5.2	80	58.1	0.83	0.19		0.94	0.2	4	22.7	9.5	0.69	16	0.1	1.4		2.04		1430	0.01	253	0.27	4.1	68.1	1.4	1690	29.1	510		0.01	0.36
MIRE	69573	Dorchap Peg	EL5315	526946	5949753	695	DORCHAP	10	PEG	PEG			Approximately 10 x50m dyke. Sampled over 10m at base of dyke. Grainsize varies from 1-150mm, dominantly 5-20mm. Quartz, feldspar, muscovite. Moderately to strongly weathered.	Chip		AD18286818	0.07	7.52	2.6	20	71.8	0.66	0.06		0.34	0.3	6	34.3	4.8	0.64	14.25	0.1	0.9		1.95		5670		292	0.44	3.11	55.5	1.7	820	41.4	630			0.17
MIRE	69574	Dorchap Peg	EL5315	524842	5948069	935	DORCHAP	10	PEG		PEG		10x20m dyke. Dominantly subcropping. Sampled over 10m. Grainsize varies from 1-80mm, dominantly 3-15mm. Quartz, feldspar, muscovite. Moderately to strongly weathered.	Chip		AD18286818	0.02	7.82	12.6	40	6.98	0.67	0.06	0.19	1.03	1.5	3	35.9	2.1	0.63	24.3		1.1	0.008	2.66	0.5	23.8	0.01	758	0.17	3.39	68.9	1.5	2530	17.1	730			0.1
MCRE	69579	Dorchap Peg	EL006486	520303	5952187	924	DORCHAP	6	PEG	PEG			6x28m dyke. Sampled over 6 m. Moderately to strongly weathered. Grainsize varies from 1-40mm, dominantly 1-10mm. Quartz, feldspar, muscovite, common garnet, minor tourmaline.	Chip		AD18286818	0.06	7.72	34.8	10	2.65	1.12	0.05		1.3	0.3	4	14.15	6.8	0.61	18.25	0.08	1.1	0.026	3.02	0.6	22.3	0.02	618	0.26	3.11	29.1	1.4	1350	16.4	450		0.01	0.11
MCRE	69580	Dorchap Peg	EL006486	520437	5952149	914	DORCHAP	8	PEG	PEG			8x10m dyke. Sampled over 8 m. Strongly weathered. Grainsize varies from 1-20mm, dominantly 1-10mm. Quartz, feldspar, muscovite, rare tourmaline.	Chip		AD18286818	0.03	7.66	18.1	10	27.4	0.89	0.07	0.63	1.28	0.3	4	17.6	2.4	0.91	20.9	0.1	1.1	0.015	2.43	0.6	55	0.01	895	0.27	3.37	56.3	1.5	2570	9.9	510			0.07
MCRE	69581	Dorchap Peg	EL006486	520452	5952132	918	DORCHAP	8	PEG	PEG			8x8m area of dyke sampled at 69580 - sample collected 20 up hill. Sampled over 8 m. Moderately to strongly weathered. Grainsize varies from 2-180mm, dominantly 10-20mm. Quartz, feldspar, muscovite.	Chip		AD18286818	0.04	7.84	8.3	10	10.6	0.8	0.1	2.36	0.61	0.3	4	22.2	1.4	0.8	20.3	0.11	0.9	0.009	3.3		65.3	0.01	1300	0.23	3.37	43.3	1	3320	10.9	740			0.07
MCRE	69582	Dorchap Peg	EL006486	520425	5951995	909	DORCHAP	5	PEG	PEG			5x15m dyke. Sampled over 5 m. strongly weathered. Grainsize varies from 2-40mm, dominantly 5-20mm. Quartz, feldspar, muscovite, common tourmaline mm.	Chip		AD18286818	0.05	7.87	47.7	50	22.7	1.03	0.07	0.71	1.01	0.7	3	25.4	4	0.76	21.7	0.09	1		2.32	0.5	78	0.02	781	0.21	3.33	55.4	1.9	2500	13.3	510			0.09
MCRE	69583	Dorchap Peg	EL006486	520085	5951943	880	DORCHAP	8	PEG	PEG			8x20m dyke striking 292 deg. Sampled over 8 m. strongly weathered. Grainsize varies from 1-40mm, dominantly 5-20mm. Quartz, feldspar, muscovite, common garnet, common tourmaline.	Chip		AD18286818	0.03	7.74	7.2	10	4.28	0.99	0.05	0.26	1.98	0.7	4	13.45	8.2	0.96	19.9	0.09	0.9	0.016	2.71	0.8	17.4	0.03	1730	0.25	3.1	34.7	1.9	1250	13.3	391			0.08
MIRE	69584	Dorchap Peg	EL5315	518915	5952104	491	DORCHAP	10	PEG	PEG			30x200 m dyke. Sampled over 10 m near top. Moderately weathered. Grainsize varies from 1-50mm, dominantly 5-20mm. Quartz, feldspar, muscovite, abundant tourmaline.	Chip		AD18286818	0.06	7.42	7.9	30	3.52	3	0.1	0.02	3.58	0.6	7	7.46	2.9	0.75	14.95	0.1	0.5	0.029	3.23	1.9	18.2	0.05	177	0.39	2.79	9.3	1.5	630	29.9	224			0.09
MIRE	69585	Dorchap Peg	EL5315	518887	5952120	487	DORCHAP	10	PEG	PEG			30x200 m dyke. Sampled over 10 m, 30m down from previous sample. Moderately weathered. Grainsize varies from 1-40mm, dominantly 2-10mm. Quartz, feldspar, muscovite, abundant tourmaline	Chip		AD18286818	0.04	7.19	3.9	20	1.44	1.98	0.08		2.46	0.4	5	9.54	2.7	0.6	14.35	0.1	0.7	0.019	3.37	1.3	9.8	0.04	322	0.22	2.74	9.1	1.2	650	22.6	244			0.1
MIRE	69586	Dorchap Peg	EL5315	518857	5952139	482	DORCHAP	10	PEG	PEG			30x200 m dyke. Sampled over 10 m, 50m down from previous sample. Moderately weathered. Grainsize varies from 1-40mm, dominantly 2-10mm. Quartz, feldspar, muscovite, abundant tourmaline, common garnet	Chip		AD18286818	0.02	7.36	8.5	20	2.1	1.66	0.13	0.13	3.27	0.5	6	9.17	2.2	0.95	13.85	0.12	1.3	0.019	3.02	1.7	11.6	0.04	1110	0.33	2.88	7.8	1.7	680	25.8	246			0.09
MIRE	69587	Dorchap Peg	EL5315	518781	5952177	453	DORCHAP	8	PEG_GRAN	PEG_GRAN			30x200 m dyke. Sampled over 10 m, 70m down from previous sample. Moderately to strongly weathered. Grainsize varies from 1-40mm, dominantly 1-4mm. Granitic pegmatite. Quartz, feldspar, muscovite, biotite. abundant tourmaline.	Chip		AD18286818	0.06	7.76	5	40	0.9	1.22	0.25		6.23	0.6	4	11.15	5.3	0.66	16.6	0.16	0.5	0.1	4.44	3.6	37.3	0.06	355	0.2	2.16	10.6	1.3	840	34.8	322			0.08
MCRE	69588	Dorchap Peg	EL006486	523414	5947990	1004	DORCHAP	12	PEG	PEG			30m wide dyke. Two sample transects across width. Sample 69588 over top 12m, sample 69589 over lower 12 m. Grain size 5-400mm, dominantly 20-100mm. Quartz, feldspar, muscovite, minor cassiderite. Moderately to stongly weathered.	Chip		AD18287984	0.1	6.94	34	10	4.19	0.78	0.08	2.37	1.02	0.5	2	53.1	2.6	0.62	22.3		1.7	0.017	2.84		133.5	0.01	1040	0.2	3.32	65.6	1.4	3110	7.7	850			0.17
MCRE	69589	Dorchap Peg	EL006486	523414	5947984	1002	DORCHAP	12	PEG	PEG			30m wide dyke. Two sample transects across width. Sample 69588 over top 12m, sample 69589 over lower 12 m. Grain size 5-400mm, dominantly 20-100mm. Quartz, feldspar, muscovite, minor cassiderite. Moderately to stongly weathered.	Chip		AD18287984	0.08	7.24	34.1	70	5.31	0.36	0.21	0.72	0.91	0.4	3	45	2.1	0.61	23.8		1.9	0.011	2.31		219	0.01	690	0.24	3.2	78.8	1.2	3470	8	710			0.28
MCRE	69590	Dorchap Peg	EL006486	523175	5948168	1040	DORCHAP	20	PEG	PEG			20x40m dyke exposure on strike line between OC441 and 441. Sample collected across 20 m transect. Quartz and feldspar dominated. Minor muscovite. Rare tourmaline and cassiderite. Grain size 1-400mm, dominantly 20-60mm. Moderately to strongly weathered.	Chip		AD18287984	0.07	7.55	21.2	40	129	0.37	0.11	0.23	3.18	0.4	5	52.2	1.6	0.65	22.3	0.05	2.5	0.005	2.45	1.5	325	0.05	601	0.23	4.08	84.7	1.8	3110	19.6	680			0.09
MCRE	69591	Dorchap Peg	EL006486	523156	5948224	1059	DORCHAP	17	PEG	PEG			17m wide transect downhill on strike line. Grainsize 1-60mm, domianntly 1-20mm. Quartz dominant, feldspar, common muscovite. Moderately to strongly weathered.	Chip		AD18287984	0.05	7.76	5.5	20	41.1	0.45	0.15	0.02	0.66	0.3	2	19.25	1.5	0.49	23		1.3	0.009	1.56		45.7	0.01	740	0.16	4.34	90.2	1.3	2350	8.6	428			0.05
MCRE	69592	Dorchap Peg	EL006486	523085	5948210	1043	DORCHAP	11	PEG	PEG			Northwestern extension of dyke previously mapped at 441. Sampled over 11m transect. Quartz, feldspar, muscovite. Minor possible cassiderite - weathered. Grainsize 1-100mm, dominantly 1-20mm, moderately to strongly weathered.	Chip		AD18287984	0.04	8.63	28	20	21.5	0.54	0.17	0.22	0.59	0.2	3	41.8	3.3	0.54	22.8		1.8	0.013	2.27		87.2	0.01	734	0.22	4.12	94.3	2	1700	16.2	710			0.13
MIRE	69593	Dorchap Peg	EL5315	523960	5949341	1045	DORCHAP	25	PEG	PEG			25 x 15m dyke. Sampled over 25m. Grainsize varies from 1-60mm. Dominantly 2-10mm, feldspars up to 60mm. Quartz, feldspar, muscovite. Moderately to strongly weathered	Chip		AD18287984	0.03	7.76	31	20	28.3	1.19	0.21	0.4	0.79	0.2	3	44	1.2	0.51	19.8	0.05	1.4	0.016	2.81		47.8	0.01	666	0.24	3.51	72.7	1.2	2420	16.9	750			0.06
MIRE	69594	Dorchap Peg	EL5315	523957	5949439	997	DORCHAP	10	PEG	PEG			25m area of boulders in gully. Sampled over 10x5m. Quartz, feldspar, muscovite. Grainsize dominanlty 5-10mm, ranges from 1-40mm. Moderately to strongly weathered	Chip		AD18287984	0.08	7.27	18.5	10	78.8	0.39	0.05	0.46	0.68	0.4	3	40.4	1.5	0.38	20		1.6		2.13		444	0.01	582	0.28	3.75	65.6	1.5	920	14.3	660			0.09
MIRE	69595	Dorchap Peg	EL5315	526542	5956701	987	DORCHAP	2.5	PEG	PEG			2x2.5m pegmatite. Sampled over 2.5m. Quartz, feldspar, muscovite. Minor cassiderite. Grainsize 1-20mm, dominalty 2-5mm. Moderately to strongly weathered. Quartz and feldspar dominant.	Chip		AD18287984	0.07	7.66	68.9	40	17.95	0.42	0.13		1.08	0.3	4	49.4	2.3	0.5	19.45		1.9		1.39	0.7	19.8	0.02	168	0.22	4.43	63.8	1.6	1510	19.1	470			0.12
MCRE	69596	Dorchap Peg	EL006486	534342	5943389	961	DORCHAP	10	PEG	PEG			45x10 m dyke. Sample collected from eastern side over 10m. Quartz, feldspar, muscovite. Grainsize 1-100mm, dominantly 10-20mm. Moderately to strongly weathered.	Chip		AD18287984	0.05	7.65	22.6	60	84.3	0.61	0.22		1.2	0.7	4	39.3	1.3	0.42	18.55		0.9		2.42	0.7	680	0.02	290	0.21	3.8	64.1	1.9	1940	19	710			0.11
MCRE	69597	Dorchap Peg	EL006486	534346	5943373	967	DORCHAP	9	PEG	PEG			45x10 m dyke. Sample collected from large protruding central part of outcrop over 9m. Sediment contact with dyke 317/SW/30. Quartz, feldspar, muscovite, rare tourmaline. Grainsize 1-200mm, dominantly 10-20mm. Moderately weathered.	Chip		AD18287984	0.05	8.06	8.3	70	98.2	0.46	0.07		0.63	0.6	4	46.4	1	0.44	21.2		2.3		1.9	0.5	77.7	0.01	198	0.2	4.41	150	1.3	1570	15.6	690			0.12
MCRE	69598	Dorchap Peg	EL006486	534364	5943377	956	DORCHAP	10	PEG	PEG			45x10 m dyke. Sample collected downhill from dyke over 10m. Quartz, feldspar, muscovite. Grainsize 1-100mm, dominantly 5-15mm. Moderately to strongly weathered.	Chip		AD18287984	0.03	7.85	9.8	20	342	0.17	0.12	0.17	0.77	0.5	3	112	1	0.39	31.3		5.5		1.21	0.7	96.4	0.01	214	0.19	4.82	161.5	1.6	1700	14.3	860			0.12
MIRE	69599	Dorchap Peg	EL5315	522095	5950317	981	DORCHAP	8	PEG	PEG			Approximately 20x8m dyke. Sampled over 8m. Grainsize ranges from 2-400mm, dominantly 10-40mm. Quartz, feldspar, muscovite. Dyke striking 320deg. Sediment contact 321/NE/46. Moderately weathered.	Chip		AD18287984	0.03	8.27	121.5	30	10.5	0.54	0.11	0.6	1.09	0.5	4	34	1.2	0.71	24.2		0.8	0.015	3.6	0.5	93.8	0.01	976	0.24	3.12	59.8	1.4	2750	17.6	750		0.01	0.13
MIRE	69600	Dorchap Peg	EL5315	522051	5950367	967	DORCHAP	7	PEG	PEG			approximately 25x15m dyke. Sampled across 7m in centre. Quartz, feldspar, minor muscovite, minor cassiderite. Grainsize 1-250mm, dominantly 5-15mm. Moderately to strongly weathered.	Chip		AD18287984	0.08	8.33	6.2	30	31.4	0.56	0.17	0.27	1.9	0.5	3	39.3	0.5	0.61	25.7	0.05	0.6		3.1	1	154	0.02	969	0.18	3.04	72.1	1.4	2750	11.5	780			0.05
MIRE	69601	Dorchap Peg	EL5315	521963	5950424	992	DORCHAP	8	PEG	PEG			65x20m dyke. Sample from southest side over 8m. Moderately to strongly weathered. Quartz, fledspar, muscovite. Minor cassiderite, rare garnet. Grainsize 1-200mm, dominantly 1-30mm. Dyke trending 320 deg.	Chip		AD18287984	0.02	7.64	85.1	50	155.5	0.57	0.1		1.77	0.5	6	28.2	1.2	0.61	19.2		1.3	0.017	2.33	0.8	138.5	0.02	240	0.52	3.75	71.5	2.1	1200	15	490			0.12
MIRE	69602	Dorchap Peg	EL5315	521943	5950426	993	DORCHAP	20	PEG	PEG			65x20m dyke. Sample from northeastern side of dyke over 20m. Moderately weathered. Dominantly feldspar, some quartz, minor muscovite. Rare cassiderite, fine sub-mm needles of tourmaline. Feldspars to 900mm, commonly to 300mm. Grainsize dominantly 1-30mm.	Chip		AD18287984	0.05	8.42	11.4	50	49.4	0.54	0.08	0.06	0.69	0.3	5	22.3	0.3	0.65	16		0.2		3.43		213	0.02	383	0.31	3.59	29.8	1.5	1370	14.5	580			0.35
ERE	69603	Glen Wills Peg	EL006277	546856	5921613	1294	DORCHAP	13	PEG	PEG			30x 13 m dyke sampled across 13m. Pegmatite dyke. Grainsize 1-30mm, dominantly 5-20mm. Quartz, feldspar, muscovite, abundant tourmaline. Quartz veins upto 10 cm thick forming % of the outcrop. Moderately weatered. Some biotite or weathered muscovite? Rare feldspars to 450mm. Dyke striking 320 deg.	Chip		AD18287984	0.04	7.77	39.6	160	2.79	1.03	0.13	0.02	11.85	0.6	8	48.8	1.4	1.05	28.3		1.2	0.074	3.56	5.7	186	0.16	738	0.18	2.09	62.3	2.2	1130	17.4	600			0.21
ERE	69604	Glen Wills Peg	EL006277	547369	5922579	1172	DORCHAP	5	PEG	PEG			5x15m dyke sampled across 5 m. Very weathered. Quartz, feldspar and amblygonite, possible lepetilite. Occasional dark green tourmaline. Common cassiderite. Common to minor muscovite, occasional tourmaline (schorl). Grainsize 10-100mm, dominanlty 10-50mm.	Chip		AD18287984	0.02	8.25	17.3	70	100.5	0.7	0.07		4.22	1.1	4	356	1.7	0.5	22.5	0.11	2.1		3.96	5.9	58.8	0.03	260	0.18	2.59	50.9	4	2380	8.8	1480			0.64
ERE	69605	Glen Wills Peg	EL006277	547259	5922581	1199	DORCHAP	0.5	PEG	PEG			5x15m dyke sampled across 5 m. Very weathered. Quartz, feldspar and amblygonite, possible lepetilite. Occasional dark green tourmaline. Common cassiderite. Common to minor muscovite, occasional tourmaline (schorl). Grainsize 10-100mm, dominanlty 10-50mm.	Grab		AD18287984	0.07	7.71	7	140	49	0.14	0.11		1.8	0.6	3	349	0.3	0.31	14.4		2		4.08	1.4	16	0.01	72	0.15	3.42	46.5	1.6	2870	6.4	1390			0.51
ERE	69606	Glen Wills Peg	EL006277	547262	5922510	1218	DORCHAP	4	PEG	PEG			8x4m dyke striking 340deg sampled over 4 m. Series of dsitrupted blocks from forestry work and track building. Moderately weathered. Grainsize dominantly 2-15mm. Quartz, eldspar, muscovite, abundant tourmaline, plumerose muscovite.	Chip		AD18287984	0.05	7.26	12.3	30	2.63	0.85	0.25	0.04	4.69	0.6	4	20	1.8	0.6	20.8		0.6	0.077	3.23	2.4	19.1	0.05	292	0.26	2.64	17.2	2.3	1090	22.8	336			0.05
ERE	69607	Glen Wills Peg	EL006277	547182	5922640	1233	DORCHAP	9	PEG	PEG			9m wide outcrop in road cutting, sampled over 9m. 2.5 m wide sheared sediment interval in middle of dyke. Grainsize 2-60mm, dominantly 5-20mm. Quartz, feldspar, muscovite, amblygonite, lepetilite?, minor tourmaline, rare garnet. Moderately to strongly weathered.	Chip		AD18287984	0.06	7.38	5.8	60	3.38	0.97	0.08	0.09	5.31	0.8	7	21.6	3.9	0.84	21	0.05	1.5	0.061	2.78	3.3	26.1	0.07	451	0.27	2.67	35.1	2.2	1080	15.1	409			0.1
ERE	69608	Glen Wills Peg	EL006277	547313	5922820	1220	DORCHAP	15	PEG	PEG			50x20m dyke sampled over 15m. Disturbed by forestry work. Dyke striking 312deg. Moderately to strongly weathered. Quartz, feldspar, muscovite, Abundnant fine tourmaline, common garnet. Grainsize dominantly 2-15mm, ranging from 1-30mm. Quartz veins up to 4cm wide forming % of the outcrop.	Chip		AD18287984	0.03	7.75	11	30	6.55	1.45	0.12	0.05	1.65	1.1	5	41.3	3.1	0.73	21.4		1.2	0.051	3.07	1.1	21.4	0.03	659	0.36	3.03	32.8	2.5	1850	9.6	610			0.06
ERE	69609	Glen Wills Peg	EL006277	547661	5923045	1181	DORCHAP	8	PEG	PEG			15x8m dyke on the edge of skid pad. Strongly weathered. Grainsize 1-60mm, dominantly 5-10mm. Quartz, feldspar, minor muscovite, possible amblygonite.	Chip		AD18287984	0.02	7.51	11	100	3.68	0.84	0.06		1.93	0.9	3	18.95	3.3	0.56	24.2		1	0.067	2.41	2.6	11.4	0.06	200	0.15	3.37	48.5	3	870	7.6	420			0.06
ERE	69610	Glen Wills Peg	EL006277	547607	5922997	1174	DORCHAP	12	PEG		PEG		20x12m dyke, sampled over 12m. Dominanlty subcropping. Moderately to strongly weathered. Quartz, feldspar, muscovite, monir tourmaline. Grainsize 1-80mm, dominanlty 10-25mm.	Chip		AD18287984	0.01	7.74	9.8	40	4.08	0.65	0.08		2.74	0.6	4	31.1	2.1	0.64	26.3		1.5	0.058	2.71	1.6	31.3	0.03	536	0.21	3.21	63.3	1.8	940	13.1	580			0.07
ERE	69611	Glen Wills Peg	EL006277	547804	5925043	1146	DORCHAP	14	PEG		PEG		Large distributed area of subcropping pegmatite dispersed by bulldozer track. Sampled collected across 14m. Strongly weathered. Grainsize 1-200mm, dominantly 1-20mm, Quartz, feldspar, muscovite, possible petalite, possible ambligonite, minor tourmaline.	Chip		AD18287984	0.02	7.51	84.4	40	3.51	1.45	0.07		2.25	0.7	3	25.5	3.9	0.59	22.1		0.8	0.051	2.85	2.1	11.6	0.03	757	0.18	3.08	40.6	2.4	1150	11.8	540			0.07
ERE	69612	Glen Wills Peg	EL006277	547767	5923061	1156	DORCHAP	10	PEG				Large distributed area of subcropping pegmatite dispersed by bulldozer track. Sampled collected across 10m. Strongly weathered. Grainsize 1-200mm, dominantly 1-20mm, Quartz, feldspar, muscovite, possible petalite, possible ambligonite, minor tourmaline.	Chip		AD18287984		8.52	2.4	50	3.78	0.78	0.06		1.62	1	5	23	1.8	0.62	24.8		1	0.034	2.93	1.2	9.7	0.06	342	0.19	3.47	54	2.5	1130	8.6	640			0.06
ERE	69613	Glen Wills Peg	EL006277	546935	5921581	1309	DORCHAP	12	PEG	PEG			30x 40m dyke, sampled over 12m at north end. Grainsize 1-80mm, dominantly 5-20mm. Quartz, fledspar, muscovite. Dark green mica - chloritised? Abundant to common tourmaline (schorl), possible ambligonite.	Chip		AD18287984	0.03	7.89	3.3	180	2.09	0.66	0.1		3.28	1.2	4	23.4	0.4	0.53	20		0.8	0.032	3.37	1.7	50.2	0.08	197	0.2	2.85	27.7	1.9	1360	17.6	440			0.14
ERE	69614	Glen Wills Peg	EL006277	546951	5921557	1303	DORCHAP	10	PEG	PEG			30x 40m dyke, sampled over 10m at southeast end. Grainszie 1-80mm, dominantly 5-20mm. Quartz, fledspar, muscovite. Dark green mica - chloritised? Abundant to common tourmaline (schorl), possible ambligonite.	Chip		AD18287984	0.05	7.56	4	70	1.82	0.43	0.15	0.02	2.23	1	3	13.75	0.6	0.36	18.45		0.6	0.016	1.99	1.3	33.5	0.04	199	0.15	3.96	15.9	2.2	1310	17.9	263			0.08
ERE	69615	Glen Wills Peg	EL006277	546989	5921594	1292	DORCHAP	6	PEG	PEG			30x 40m dyke, sampled over 6m at east end. Grainsize 1-80mm, dominantly 5-20mm. Quartz, fledspar, muscovite. Abundant tourmaline (schorl), Very weathered	Chip		AD18287984	0.11	8.66	3	180	2.24	0.36	0.08	0.02	2.41	1.3	3	38.1	1.2	0.45	17.65		0.7	0.014	4.91	1.5	58.5	0.04	271	0.2	2.75	17.6	2.1	1620	32.7	770			0.22
ERE	69616	Glen Wills Peg	EL006277	547173	5921380	1288	DORCHAP	7	PEG		PEG		20x20m area of subcropping pegmatite, sampled over 7 m adjacent to old trenching. Centre is mullock heap and shaft. Quartz, feldspar, muscovite. Common to abundant tourmaline (schrl), some with a green tinge. Grainsize 2-80mm, dominantly 5-20mm. Strongly weathered.	Chip		AD18287984	0.08	7.72	15.9	40	2.95	0.18	0.07		3.37	2.3	6	44.8	1.4	0.8	31		1.5	0.139	2.89	3.4	76.5	0.07	363	0.24	2.12	50.9	3.2	1110	11.9	550			0.25
ERE	69617	Glen Wills Peg	EL006277	547294	5920724	1344	DORCHAP	25	PEG	PEG			25x90m dyke. Sampled at northwest end over 25m. Grainsize 2-250mm, dominantly 5-35mm. Quartz and muscovite dominant, feldspar, common to abundant tourmaline (schorl). Moderately weathered.	Chip		AD18287984		6.25	112.5	20	1.38	0.4	0.13		2.21	0.3	4	34.9	2.7	0.68	21.1		1.1	0.093	1.85	0.9	13.2	0.04	185	0.22	2.64	40.1	1.1	850	7.6	510			0.11
ERE	69618	Glen Wills Peg	EL006277	547248	5920730	1367	DORCHAP	14	PEG	PEG			25x90m dyke. Sampled at southeast end over 14m. Grainsize 2-250mm, dominantly 5-35mm. Quartz and muscovite dominant, feldspar, common to abundant tourmaline (schorl). Moderately weathered. Quartz veins to 15cm thick, typically % of the outcrop, but locally up to 50%.	Chip		AD18287984	0.01	6.31	17.7	10	1.42	0.65	0.15	0.04	2.95	0.5	4	31.7	4.6	0.69	22.2		1.4	0.129	1.31	1.3	39.9	0.04	338	0.26	2.74	37	2.3	940	6.7	346			0.15
ERE	69619	Glen Wills Peg	EL006277	546434	5919681	1419	DORCHAP	15	PEG_GRAN	PEG_GRAN			15x50m dyke sampled across 15m. Grainsize 1-90mm, dominantly 1-15mm. Quartz, fledspar, muscovite, abundant tourmaline, common garnet. Strongly weathered. Quartz veins up to 10cm thick forming less then 1% of the outcrop.	Chip		AD18287984	0.13	7.1	7		0.56	0.78	0.17	0.07	1.91	0.2	4	17.05	1.6	0.56	15.9		0.6	0.038	3.85	0.9	17.2	0.03	217	0.14	2.62	13.6	0.6	1380	15.7	449			0.15
ERE	69620	Glen Wills Peg	EL006277	548191	5919875	1275	DORCHAP	15	PEG	PEG			60x25m dyke. Tw samples collected, 69620 from west, 69621 from east side. Sample clllected over 15m. Grain size 2-400mm, dominantly 2-30mm. Quartz, fledspar, muscovite, common garnet, tourmaline. Occasional quartz veins 2-10cm thick forming % of outcrop. moderately to strongly weathered.	Chip		AD18287984	0.05	7.56	95.6	20	1.88	1.55	0.08	0.09	2.91	0.3	3	41.1	3.6	0.62	23.3		1.2	0.054	3.12	1.2	22.3	0.03	670	0.13	2.86	33.8	0.7	1280	6.1	640			0.3
ERE	69621	Glen Wills Peg	EL006277	548193	5919902	1272	DORCHAP	12	PEG	PEG			60x25m dyke. Tw samples collected, 69620 from west, 69621 from east side. Sample clllected over 12m. Grain size 2-400mm, dominantly 2-30mm. Quartz, fledspar, muscovite, abundant garnet, common tourmaline. Occasional quartz veins 2-10cm thick forming % of outcrop. moderately to strongly weathered.	Chip		AD18287984	0.02	7.07	79.8	40	2.35	1.1	0.14	0.16	1.15	0.2	3	31.6	4.7	0.59	22.1		0.8	0.038	2.55	0.5	8.6	0.02	808	0.18	3.78	36.2	1.4	1590	6.4	490			0.27
ERE	69622	Glen Wills Peg	EL006277	548142	5919822	1261	DORCHAP	16	PEG	PEG			90x30m dyke. Sampled across 16m at northwest end of dyke. Grainsize 1-200m, dominantly 5-25 mm. Quartz, feldspar, muscovite, abundant tourmaline, minor garnet. Moderately to strongly weathered	Chip		AD18287984	0.05	7.2	17	20	0.91	1.4	0.12	0.06	2.08	0.4	5	14.6	2.3	0.82	19.5		0.8	0.056	3	1	10	0.04	329	0.2	2.86	29	1.1	1140	10.7	429			0.1
ERE	69623	Glen Wills Peg	EL006277	548179	5919807	1276	DORCHAP	16	PEG	PEG			90x30m dyke. Sampled across 16m at southeast end of dyke. Grainsize 1-100m, dominantly 5-60 mm. Quartz, feldspar, muscovite, abundant tourmaline, abundant garnet. Moderately weathered	Chip		AD18287984	0.03	7.52	12.9	20	1.01	1.12	0.15	0.19	2.36	0.4	4	11.4	1.7	0.73	17.35		1.4	0.04	3.41	1.1	9	0.03	851	0.2	3.13	13.8	1.3	1370	12.4	439			0.08
ERE	69624	Glen Wills Peg	EL006277	548014	5919700	1249	DORCHAP	25	PEG	PEG			30x90m dyke Sampled across 25 m near base of outcrop. Quartz, feldspar, muscovite, abundant tourmaline. Grainsize 1-100mm, dominantly 5-15mm. Moderately weathered.	Chip		AD18287984	0.03	7	5.4	30	1.25	0.62	0.2	0.03	2.66	0.9	4	8.27	2.2	0.59	16.7		0.8	0.06	2.48	1.4	3.1	0.05	134	0.36	3.06	16.1	1.4	1060	10.9	260			0.09
ERE	69625	Glen Wills Peg	EL006277	547978	5919668	1273	DORCHAP	7	PEG	PEG			30x90m dyke Sampled across 7 m near top of outcrop. Quartz, feldspar, muscovite, abundant tourmaline (schorl). Plumerose muscovite. Tourmaline inclusions in quartz. Grainsize 1-150mm, dominantly 5-15mm. Moderately weathered.	Chip		AD18287984	0.04	7.65	17.7	40	0.96	0.78	0.16		3.34	1.3	11	8.13	5.3	0.56	17.4		0.5	0.052	3.43	1.9	4.7	0.06	155	0.63	3	14.1	2.1	1060	18.3	323			0.08
ERE	69626	Glen Wills Peg	EL006277	548439	5920332	1261	DORCHAP	10	PEG	PEG			40x70 m dyke in forestry clearing. Sample from northwest end of dyke sampled over 10m. Quartz, feldspar, abundant muscovite, minor tourmaline (schorl), some with a green tinge. Blue iron phospate minerals. Feldspars upt o 400mm, grainsize dominantly 10-35mm. Moderately to strongly weathered.	Chip		AD18287984	0.06	7.06	1.9	20	1.59	0.42	0.19		1.17	1.5	5	30.2	1.8	0.52	17.15		0.5	0.025	2	1	6.7	0.7	183	0.55	3.01	34.5	2.9	1860	4.5	416			0.09
ERE	69627	Glen Wills Peg	EL006277	548437	5920335	1260	DORCHAP	0.5	PEG	PEG			40x70 m dyke in forestry clearing. Sample from northwest end of dyke -grab sample. Quartz, feldspar, abundant muscovite, minor tourmaline (schorl), some with a green tinge. Blue iron phospate minerals. Feldspars upt o 400mm, grainsize dominantly 10-35mm. Moderately to strongly weathered.	Grab		AD18287984		6.71	0.2	20	2.1	0.1	0.6	0.04	1.26	0.9	4	25.8	0.5	0.71	22.4		0.3	0.048	0.99	0.9	4.5	0.06	868	0.2	3.53	54	1.7	5780	2.6	292			0.07
ERE	69628	Glen Wills Peg	EL006277	548461	5920307	1256	DORCHAP	9	PEG	PEG			40x70 m dyke in forestry clearing. Sample from southeast end of dyke sampled over 9m. Quartz dominant, feldspar, muscovite, common tourmaline (schorl). Minor garnet. Grainsize 5-400mm, dominantly 20-200mm. Moderately to strongly weathered. Outcrop is upt o 50% quartz in places.	Chip		AD18287984	0.01	7.06	24.9	10	1.55	0.33	0.12	0.07	1.43	0.5	4	28.2	3	0.69	22.9		1	0.064	2.72	0.6	14.6	0.03	684	0.36	2.84	51.4	1	1360	6.3	590			0.14
ERE	69629	Glen Wills Peg	EL006277	548358	5920403	1249	DORCHAP	9	PEG	PEG			15x50m dyke alongside road. Sampled across 9m at top of dyke. Grainsize 1-100mm, dominanalty 5-30mm. Quartz, feldspar, muscovite, abundant tourmaline. Strongly weathered.	Chip		AD18287984	0.02	7.22	19.9	20	1.75	0.26	0.15	0.11	2	0.5	5	14.25	2.5	0.83	20.9		1.5	0.046	1.88	0.9	9.3	0.04	585	0.31	3.77	41.9	1.9	1540	8	337			0.08
ERE	69630	Glen Wills Peg	EL006277	548345	5920440	1241	DORCHAP	12	PEG	PEG			15x50m dyke alongside road. Sampled across 12m at base of dyke. Grainsize 1-100mm, dominanalty 5-30mm. Quartz, feldspar, muscovite, abundant tourmaline. Strongly weathered.	Chip		AD18287984	0.01	8.23	1.1	20	1.8	0.05	0.17		2.14	0.7	4	16.2	1	0.53	27.2		1.2	0.078	1.45	1	2.9	0.11	124	0.21	4.11	43.1	2.1	1400	4.4	343			0.05
ERE	69631	Glen Wills Peg	EL006277	548444	5920695	1222	DORCHAP	25	PEG	PEG			25x70m dyke previously sampled at sample 69552. Sampled across 25m at roadside. Grainsize 1-400mm, variable grainsize but dominantly 2-80mm. Quartz, fledspar, muscovite, abundant tourmaline (schorl). Moderately to strongly weathered.	Chip		AD18287984	0.02	7.88	36.1	20	2.39	0.54	0.15	0.07	1.12	0.4	4	44.1	1.6	0.7	24.4		0.8	0.086	3.36	0.7	9.7	0.03	861	0.25	3.14	50.2	1.6	1950	6.4	790			0.09
ERE	69632	Glen Wills Peg	EL006277	546315	5919764	1439	DORCHAP	10	PEG_GRAN	PEG_GRAN			100x55m dyke at helitarget 473. Sampled across 10m at top of dyke. Grainsize 2-200mm, dominantly 5-30mm. Quartz, feldspar, muscovite, abundant fine tourmaline, common garnet.	Chip		AD18287984	0.1	6.93	128	30	0.92	2.03	0.17	0.18	2.31	0.3	6	12.8	4.5	1.05	17.9		1.3	0.043	2.53	1.1	11.4	0.04	1800	0.24	2.68	14.9	1.1	990	13.1	316			0.21
ERE	69633	Glen Wills Peg	EL006277	547625	5919927	1240	DORCHAP	20	GRN_C	GRN_C			granite dyke. Approx 200m wide. Sampled over 20m near core. Approximate east-west orientation of granite body. Vague pegmatitic core. Grainsize consistently 2-5mm, quartz, fledspar, muscovite, biotite. Moderately to strongly weathered.	Chip		AD18287984	0.08	7.52	8.9	120	1.77	2.34	0.28	0.09	18.55	0.8	6	38.1	2.6	0.68	22.3	0.06	1.7	0.134	3.74	9.1	67.5	0.1	163	0.14	2.03	19.1	1.7	1130	25.5	431			0.33
ERE	69634	Glen Wills Peg	EL006277	547704	5919893	1256	DORCHAP	7	PEG_GRAN	PEG_GRAN			Pegmatite core within granite dyke. Sampled across 7m. Grainsize 2-400mm, dominantly 5-20mm. Quartz, feldspar, muscovite, common tourmaline (schorl). Moderately to strongly weathered.	Chip		AD18287984	0.04	7.26	32	20	0.77	1.73	0.17		2.91	0.3	7	13.95	3	0.71	16.2		0.5	0.061	4.1	1.4	6.4	0.04	170	0.57	2.46	13.5	1.8	1050	23.5	389			0.12
ERE	69635	Glen Wills Peg	EL006277	546704	5922362	1196	DORCHAP	5	PEG	PEG			5m wide pegmaite near the base of Knocker track exposed in roadside outcrop. Grainisze 1-35mm, dominantly 5-25mm. Quartz, fledspar, muscovite, abundnant tourmaline. Moderately ot strongly weathered.	Chip		AD18287984	0.12	7.68	28.1	60	2.16	1.13	0.12		4.16	1.2	4	16.75	4.3	0.64	18.4	0.05	0.7	0.071	3.82	2.8	11.9	0.05	184	0.15	2.48	14.6	3.9	820	25.3	397			0.12
ERE	69636	Glen Wills Peg	EL006277	546782	5922263	1204	DORCHAP	12	PEG_GRAN	PEG_GRAN			Granitic pegmatite exposed in cutting on Knocker track. 12m wide, sampled over 12m. Grainisize 1-25mm, dominantly 2-10mm. Quartz, feldspar, muscovite, abundnant tourmaline (schorl). Moderately to strongly weathered.	Chip		AD18287984	0.08	7.56	40.7	30	1.76	1.7	0.25		4.24	0.8	5	10.95	2.8	0.66	16.5	0.06	0.7	0.059	3	2.6	10.1	0.05	198	0.25	2.7	14.3	1.6	990	20.3	271			0.13
ERE	69637	Glen Wills Peg	EL006277	546669	5921988	1238	DORCHAP	1	PEG	PEG			1m wide pegmatite vein. Hosted within sheared sediment. Grainsize 1-30mm, dominantly 5-15mm. Abundant quartz, feldspar, minor muscovite, abunandnt tourmaline (schorl). Moderately weathered.	Chip		AD18287984	0.06	7.97	50.7	90	1.48	1.95	0.18		5.63	1.2	5	17.4	2.7	0.7	19.6	0.06	0.4	0.083	4.59	5.6	17.3	0.06	174	0.22	1.94	16.4	2.6	880	34.1	377			0.13
ERE	69638	Glen Wills Peg	EL006277	546667	5921715	1268	DORCHAP	18	PEG_GRAN	PEG_GRAN			18m wide pegmatite in road cutting, hosted within strongly weathered granite. Grainisze 2-60mm, dominantly 10-25mm. Quartz, fledspar, muscovite, abundnant arge tourmaline (schorl). Moderately to strongly weatehred. Total width of granitic pegmatite body is 40m.	Chip		AD18287984	0.07	7.72	31.4	20	0.63	1.19	0.17		3.87	0.5	4	18.35	1.1	0.55	15.3		0.5	0.053	4.8	2	17.5	0.04	132	0.19	2.22	11.3	1.6	850	30.5	396			0.14
ERE	69639	Glen Wills Peg	EL006277	548131	5921655	1214	DORCHAP	16	PEG	PEG			60x20m dyke sampled over 16m. Common sediment rafts within pegmatite. Grainisze 2-100mm, dominantly 10-40mm. Quartz, feldspar, muscovite, minor fien tourmaline. Strongly weathered. Dyke strikes 315 deg.	Chip		AD18287984	0.03	7.41	15.9	50	4.82	0.34	0.24		1.88	0.4	6	201	1.6	0.68	25.9		0.4	0.014	2.06	0.9	450	0.09	352	0.18	2.76	50.8	1.7	1760	9.7	790			0.17
MIRE	69640	Dorchap Peg	EL5315	532419	5947911	533		11	PEG	PEG			Road cutting in pylon track. 11m wide dyke sampled across 11m. Quartz, dominated, feldspar, minor muscovite. Grainsize 1-20mm, dominantly 2-6mm, strongly weathered.	Chip		AD18323999		7.43	5.9	40	133	0.2	0.04		5.91	0.8	6	49	1.9	0.44	24.4	0.07	1.5		1.52	5.6	1740	0.03	101	0.21	3.77	105	4.9	1070	21.2	660			0.17
MIRE	69641	Dorchap Peg	EL5315	526974	5949741	698		9	PEG	PEG			60x14m dyke previously sampled (69572). Sampled across 9m approximately quarter of the way down the outcrop - ~15m below 69572. Grainsize 1-200mm, dominantly 1-20mm. Centre of the dyke is coarser over 4 m span, commonly 20-90mm. Quartz, fledspar, muscovite, possible petalite in centre of dyke. Moderately weathered	Chip		AD18323999	0.02	8.01	1.6	50	77.9	1.07	0.15		0.75	0.3	5	25.3	6.9	0.52	16.25	0.06	0.9	0.01	2.19		1650	0.02	241	0.25	4.15	70.9	1.2	1380	34.2	590			0.43
MIRE	69642	Dorchap Peg	EL5315	526961	5949754	692		9	PEG	PEG			60x14m dyke sampled at 69641. sample colledtec approx 15m below across a 9m length (full width of dyke). Grainsize 2-100mm, dominantly 5-30mm. Quartz, feldspar, muscovite. Possible petalite/weathered feldspar. Moderately weathered.	Chip		AD18323999		7.76	1.6	50	55.6	0.63	0.1		1.64	1	3	21.5	9.1	0.44	16.85	0.07	1		1.89	1.1	650	0.02	159	0.16	3.98	63.6	1.1	830	19.2	490		0.01	0.22
MIRE	69643	Dorchap Peg	EL5315	526927	5949756	674		3	PEG	PEG			25m downhill from the previously mapped extent of the dyke sampled at 696441 and 69642. 3m wide and smapled across 3m. Feldspars up to 300mm, quartz up to 450mm. Minor muscovite. Grainsize 1-450mm, dominantly 20-80mm. Moderately to strongly weathered.	Chip		AD18323999	0.03	7.38	1.4	110	101	0.52	0.21	0.05	0.38	0.2	4	35.5	8.4	0.54	14.75	0.07	0.4		3.11		850	0.01	242	0.18	3.78	71.4	0.7	1840	32	770		0.01	0.19
MIRE	69644	Dorchap Peg	EL5315	524008	5947518	1020		3	PEG	PEG			3m wide dyke outcropping alongside Dorchap track. Grainsize 1-20mm, dominantly 1-7mm. Quartz, fledpsar, muscovite. Moderately to strongly weathered. Large amount of float on opposite side of road (not sampled).	Chip		AD18323999	0.06	7.72	73.3	60	12.5	3.38	0.06		1.3	0.6	5	40.7	6.3	0.55	22.7	0.72	2.2		2.92	0.7	23.3	0.02	197	0.24	3.8	78.5	1.6	1700	17.8	710			0.11
MIRE	69645	Dorchap Peg	EL5315	524189	5947289	996		10	PEG	PEG			30x10m dike alongside Dorchap track. Sampled across 10m. Grainsize 5-90mm, dominantly 10-300mm. Quartz, feldspar, muscovite, strongly weathered.	Chip		AD18323999		8.14	5	30	13.3	0.19	0.29		1.17	0.5	5	41.8	4.2	0.54	26.3	0.07	1.5		1.58	0.6	35.7	0.02	631	0.23	4.17	104	1.4	3220	18.3	490			0.08
UNK	69646	Qtz reef	OUT	535840	5954758	533		0.5	QTZ			Qtz	Quartz float with pyrite on disappointment track	Grab		AD18323999	0.17	0.22	23.4	10	0.44	0.06			2.13	0.4	11	0.31	5.7	0.9	0.62	0.06	0.1		0.06	1	12.4	0.01	89	0.38	0.02	0.8	2.2	30	4.3	6.5		0.02	0.35
UNK	69647	Qtz reef	OUT	535942	5954863	494		5	Breccia	Breccia			Brecciated sediment with silica cement in 5m wide zone. Appears to show possible cassiderite and Fe-Mn oxides	Chip		AD18323999	0.03	1.84	167	90	1.35	0.42	0.01		12.85	0.4	19	2.18	5.6	1	5.37	0.06	0.5	0.011	0.74	6.9	170.5	0.1	70	0.63	0.02	2.2	2.1	90	6.6	73.1			3.08
MIRE	69648	Dorchap Peg	EL5315	529434	5949783	551		5	PEG	PEG			Resample of locality 69490. Edge of Trappers Gap Track. Historical trenching. Grainsize 2-60mm, dominantly 5-20mm. Quartz, feldspar, muscovite. Occasional cassiderite. Possible petalite, possible ambligonite. Strongly weathered. Outcrops over 5x15m, sampled over 5m.	Chip		AD18323999		7.41	2.9	70	223	0.2	0.26		0.73	0.5	4	43.7	8.7	0.45	27.3	0.07	1.3		1.31	0.6	1710	0.01	229	0.18	3.98	172	1	10000	58.5	580			0.1
MIRE	69649	Dorchap Peg	EL5315	529525	5949727	551		5	PEG	PEG			Edge of Trappers Gap Track. Historical trenching. Grainsize 1-100mm, dominantly 5-20mm. Quartz, feldspar, muscovite. Occasional cassiderite. Possible petalite, possible ambligonite. Strongly weathered. Outcrops over 5x8m, sampled over 5m.	Chip		AD18323999		6.74	1	20	205	0.05	0.1		0.52	0.2	4	49.6	1.2	0.37	21	0.08	1.3	0.005	2.54		1340		249	0.22	3.61	145	1	6020	23.4	950			0.11
MIRE	69650	Dorchap Peg	EL5315	529485	5949746	553		3	PEG	PEG			Edge of Trappers Gap Track. Historical trenching. Grainsize 2-25mm, dominantly 5-20mm. Quartz, feldspar, muscovite. Rare cassiderite. Feldspars weathered to clay. Extremely weathered. Outcrops over 3x7m, sampled over 3m.	Chip		AD18323999		8.74	3.2	40	283	0.2	0.08		1.11	0.6	3	74.7	3.8	0.48	32.8	0.07	1		2.53	0.8	77.2	0.02	202	0.13	3.54	168	2.3	2000	23.5	1130			0.11
MIRE	69651	Dorchap Peg	EL5315	530061	5949093	537		20	PEG		PEG		Edge Trappers Gap Track. Subcrop/float sample distributed over 20m. Moderately to strongly weathered. Quartz, feldspar, muscovite, rare cassiderite. Grainisze 1-30mm, dominantly 2-10mm.	Chip		AD18323999		8.05	5.6	60	60.1	0.14	0.02		3.23	0.8	4	20.3	6.5	0.47	20	0.07	1.4		2.34	4.3	12.9	0.02	113	0.17	3.35	89.3	2.1	420	19.2	470			0.11
MIRE	69652	Dorchap Peg	EL5315	527367	5946791	854		6	PEG	PEG			Trappers Gap Track, subcrop over width of 6m. Grainsize 1-90mm, dominantly 2-15mm. Quartz, fledspar, muscovite. Moderately to strongly weathered.	Chip		AD18323999		7.52	1	20	55.5	0.92	0.08		1.2	0.4	6	101.5	2.5	0.44	20.4	0.07	1.6		1.85	0.6	23.6	0.01	164	0.24	3.84	101	2.4	1190	15	1235			0.09
MIRE	69653	Dorchap Peg	EL5315	526108	5945426	998		6	PEG	PEG			Trappers Gap Track. 6m wide dykein road cutting, sampled over 6m. Quartz, feldspar, muscovite. Grainsize 1-50mm, dominantly 5-10mm. Strongly weathered.	Chip		AD18323999		8.24	51.4	70	6.72	1.95	0.09		1.65	1.6	5	26.6	8.9	0.76	23.6	0.08	1.5		2.2	1.1	37.8	0.02	567	0.64	3.05	58.5	3.6	2190	23.4	570			0.09
MIRE	69654	Dorchap Peg	EL5315	524777	5958441	822		5	PEG	PEG			25m below helitarget PH3_4. 5-20m dyke. Sampled over 5m. Quartz, feldspar, muscovite. Grainsize 1-20mm, dominantly 2-5mm. Moderately weathered.	Chip		AD18323999	0.01	7.88	4.2	20	4.67	0.62	0.28	0.07	1.14	0.5	5	38.9	0.9	0.55	24.6	0.07	1.7		3	1.2	61.1	0.01	672	0.2	3.35	60.8	1.2	2940	17.2	830			0.12
MIRE	69655	Dorchap Peg	EL5315	524823	5958248	853		8	PEG			PEG	Float spread over 6x8m area. Grainsize 5-350mm, dominantly 10-40mm. Quartz, feldspar, muscovite, possible petalite. Sampled over 6m. Strongly weathered.	GRAB		AD18323999	0.01	8.1	5.9	40	10.5	0.66	0.16	0.08	0.91	0.4	3	38.6	0.8	0.4	17.15	0.08	0.8		4.66	0.5	45.1	0.01	460	0.21	3.06	57.5	1	2110	40	820			0.1
MIRE	69656	Dorchap Peg	EL5315	524815	5958247	861		5	PEG	PEG			5m wide dyke sampled over 5m. Grainsize 5-350mm, dominantly 10-40mm. Quartz, feldspar, muscovite, possible petalite. Strongly weathered.	CHIP		AD18323999	0.02	7.76	3.8	40	5.73	0.6	0.19	0.05	0.55	0.3	5	34.7	1.1	0.64	19.9	0.07	0.7		3.51		65.2	0.01	564	0.26	3.28	60.5	1.1	2520	32.2	650			0.09
MIRE	69657	Dorchap Peg	EL5315	524715	5958238	903		9	PEG		PEG		Subcrop over 9x15m. Strongly weathered. Quartz, feldspar, muscovite.	CHIP		AD18323999		8.01	5.9	20	38.2	0.19	0.1		1.12	0.3	3	32.3	1	0.34	23.9	0.08	2.6		1.54	0.6	98.5	0.01	191	0.18	4.49	83.2	1.3	1430	18.5	480			0.07
MIRE	69658	Dorchap Peg	EL5315	524610	5958190	945		6	PEG		PEG		6m wide subcrop, quartz, feldspar, muscovite. Grainsize 1-60mm, dominantly 5-20mm. Strongly weathered	CHIP		AD18323999	0.03	7.46	9.3	40	3.97	0.57	0.06		7.56	0.9	6	37.1	2.2	0.61	23.5	0.1	1.3		2.67	4.1	50.6	0.03	412	0.19	2.88	52	2.7	1110	11.9	790			90.6
MIRE	69659	Dorchap Peg	EL5315	524601	5958187	954		6	PEG		PEG		8m wide dyke, quartz, feldspar, muscovite. Grainsize 1-60mm, dominantly 5-20mm. Strongly weathered	CHIP		AD18323999	0.04	7.86	12.2	20	4.51	0.42	0.06		0.63	0.9	4	61.7	2.4	0.52	27.8	0.07	1.5		3.61		44.8	0.01	425	0.18	2.45	72	1.8	1540	12.8	1200			0.29
SRE	69660	Dorchap Peg	EL006300	521783	5952837	803		3	PEG	PEG			Helitarget PH3_11. 3x30m dyke. Sampled over 3m. Quartz, feldspar, muscovite, rare pyrite in nodules 1-5cmm diameter. Grainsize 1-60mm, dominantly 5-30mm. Moderately to strongly weathered.	CHIP		AD18323999		7.84	141	70	6.83	0.29	0.21		1.03	0.2	4	36.6	2.6	0.56	24.1	0.08	1.6		3.05	0.5	23.6	0.01	559	0.18	3.38	57.6	1	2320	15.3	770			0.13
SRE	69661	Dorchap Peg	EL006300	521289	5953002	788		15	PEG	PEG			Helitarget PH3_12. 15x50m dyke. Sampled over 15m. Grainisze 1-90mm, dominanlty 5-25mm. Quartz, feldspar, muscovite. Moderately to strongly weathered	CHIP		AD18323999		8.06	6	10	5.86	0.42	0.08	0.49	0.79	0.3	3	17.3	3.9	0.62	27.6	0.08	0.6	0.014	2.48		56	0.01	901	0.67	3.31	65.2	0.9	2360	10.9	560			0.24
SRE	69662	Dorchap Peg	EL006300	521282	5953182	745		20	PEG	PEG			120m above BIG13. 20x50m dyke. Sampled over 20m. Grainsize 1-150mm, dominantly 2-25mm. Quartz, fledspar, muscovite, possble orthoclae along with albite. Strongly weathered.	CHIP		AD18323999	0.02	7.96	51.4	20	3.51	0.53	0.1	0.4	0.62	0.4	3	24.5	2.6	0.63	24.5	0.08	1	0.014	3.01		79	0.01	954	0.2	3.06	52.7	1.2	1850	13.4	660			0.09
SRE	69663	Dorchap Peg	EL006300	521248	5953421	730		10	PEG	PEG			85x25m dyke. Sampled across 10m. Grainsize 1-50mm, dominantly 2-10mm. Quartz, feldspar, muscovite. Strongly weathered.	CHIP		AD18323999	0.01	8.02	34.4	20	4.06	0.46	0.07	0.17	1.18	0.3	4	20.3	2.4	0.53	23.2	0.07	0.9	0.012	2.48	0.9	39.8	0.01	473	0.19	3.58	52.9	1.1	1360	12.8	570			0.07
SRE	69664	Dorchap Peg	EL006300	521227	5953591	665		11	PEG	PEG			11x20m dyke, sampled over 11m. Grainsize 2-70mm, dominantly 5-20mm. Quartz, feldspar, muscovite. Strongly weathered.	CHIP		AD18323999	0.01	7.29	68.7	30	5.21	0.67	0.13	0.17	4.34	0.3	5	20.2	6.1	0.73	20.4	0.07	1	0.017	2.26	2.3	52	0.03	634	0.2	3.59	40	1	1780	13.2	470			0.12
SRE	69665	Dorchap Peg	EL006300	520078	5953418	845		15	PEG	PEG			Large dyke near tin mine. Base of dyke sampled previously. Sample collected near top of dyke over 15m. Quartz, feldspar, muscovite. Minor garnet. Grainsize 1-400mm, domianntly 2-70mm.	CHIP		AD18323999		7.93	26.6	20	6.98	0.69	0.03		1.96	0.4	4	19.3	7.2	0.66	26.7	0.12	2.3	0.013	2.66	1	24.7	0.02	801	0.23	2.87	49	1.3	1500	12	550		0.01	0.09
UNK	69666	Glen Wills Peg	OUT	540849	5932472	1040		5	PEG	PEG			Duncans Log track. 5m wide pegmatite sampled over 5m. Grainsize 1-20mm, dominantly 2-5mm. Quartz, feldspar, muscovite. Moderately to strongly weathered.	CHIP		AD18323999		7.3	2	10	159	0.23	0.15		0.58	0.4	5	59.8	0.9	0.47	25.8	0.08	2.9		1.64		45.7	0.01	224	0.26	3.83	110.5	1.3	1540	12	870			0.09
UNK	69667	Glen Wills Peg	OUT	540902	5932377	1053		12	PEG	PEG			Duncans Log track. 12m wide pegmatite. Trench on west side of dyke. Grainisze 1-30mm, dominantly 10-18mm. Quartz, feldspar, muscovite. Moderately weathered.	CHIP		AD18323999		8.23	2	20	112	0.41	0.05		0.95	0.3	3	88	1.4	0.4	30	0.08	2.9		2.28		107	0.02	156	0.17	3.61	85.6	1.2	970	13.4	1250			0.1
ERE	69668	Migmatite	EL006277	543149	5917514	1117		8	GNEISS	GNEISS			80m above GPS point for Ivanhoe Reef. 40x8m quartz rich dyke within gneiss/migmatite. Sampled over 8m. Dominantly quartz, some fledspar. Common biotite, minor tourmaline. Grainsize 2-100mm, dominantly 10-25mm. Strongly weathered. Strikin approx 260deg.	CHIP		AD18323999	0.03	7.17	1.5	630	0.77	2.53	0.56		7.79	1.1	4	4.76	5	0.46	11.65	0.08	0.5	0.01	4.84	4.2	11.6	0.06	78	0.2	1.59	1.9	2.1	640	62.1	189.5
ERE	69669	Migmatite	EL006277	542966	5917169	1111		5	GNEISS	GNEISS			15x5m dyke. Pale grey within gneiss/migmatite. Quartz, feldspar, biotite. Feldspar dominated. Sampled over 5m. Moderately to strongly weathered. Striking 260 deg.	CHIP		AD18323999	0.04	7.57	2.3	1310	0.69	1.56	0.13	0.02	10.9	1.3	6	4.56	7	0.81	12.15	0.09	0.8	0.021	5.98	6.4	6.2	0.11	118	0.36	0.99	3.6	3.4	950	86.4	192			0.05
ERE	69670	Glen Wills Peg	EL006277	549001	5921044	1137		13	PEG		PEG		subcrop over 13m on forestry coup. Pegmatite. Grainsize 5-80mm, dominantly 10-30mm, Quartz, fledspar, muscovite. Minor lepitilite and ambligonite. Strongly weathered.	CHIP		AD18323999		7.74	7.7	80	3	0.83	0.35		2.03	1.2	6	30.4	1.8	0.61	28.7	0.08	1.8	0.02	2.54	1.1	18.3	0.03	167	0.28	3.56	85.9	2.5	2850	6.4	620			0.11
ERE	69671	Glen Wills Peg	EL006277	549478	5921491	1039		3	PEG		PEG		Helitarget H45 - 60m east. Subcropping dyke 12x3m, sampled over 3m. Quartz, fledspar, muscovite. Possible ambligonite - likely weathered feldspar. Moderately to strongly weathered. Rare iron phosphate. Grainsize 2-250mm, dominantly 5-30mm.	CHIP		AD18323999		7.62	2.6	100	3.04	1.79	0.79		1.23	1.4	4	18	1.8	0.6	32.3	0.08	0.9	0.009	2.91	1	33.2	0.08	432	0.21	2.3	84.5	1.5	5100	7.2	610			0.06
ERE	69672	Glen Wills Peg	EL006277	549852	5921795	1056		6	PEG	PEG			6m wide dyke in forestry coup. Sampled over 6m. Grainsize 3-40mm, dominantly 5-20mm. Quartz, feldspar, muscovite. Moderately to strongly weathered.	CHIP		AD18323999		8.13	27.6	70	3.11	0.34	0.27		4.69	2	5	23.7	4.3	0.56	25.2	0.08	1.3	0.016	2.13	2.4	15.2	0.05	187	0.2	3.99	76.4	2.6	2400	8.1	500			0.05
ERE	69673	Glen Wills Peg	EL006277	549396	5921978	976		5	PEG	PEG			Lanmans track near ridge. 5m wide outcrop in road cutting. Grainsize 2-50mm, dominantly 5-15mm. Quartz, fledspar, muscovite. Moderately to strongly weathered.	CHIP		AD18323999		7.38	2.4	20	3.55	0.05	0.24		4.04	0.8	4	38.3	1	0.52	22	0.09	4.1		1.01	2.5	4.1	0.07	209	0.21	4.23	96	2.2	1630	5.1	348			0.12
ERE	69674	Glen Wills Peg	EL006277	548146	5919074	1410		15	PEG	PEG			50m below Helitarget 352. 15x30m dyke. Sampled over 15m. Quartz, feldspar, muscovite. Grainsize 2-40mm, dominantly 5-20mm. Minor tourmaline (schorl). Minor to common garnet. Rare cassiderite. Strongly weathered.	CHIP		AD18323999		7.45	23	60	1.47	2.53	0.13	0.26	1.03	0.4	4	29.5	2.2	0.95	19.9	0.08	1	0.026	2.77		7.3	0.04	1690	0.21	2.84	47.9	0.5	1620	5.4	640			0.11
ERE	69675	Glen Wills Peg	EL006277	548041	5919091	1444		20	PEG	PEG			80m northeast of 352. 65x30m dyke. Sampled over 20m. Grainisze 1-40mm, dominantly 2-15mm. Quartz, feldspar, muscovite, common tourmaline. Strongly weathered.	CHIP		AD18323999	0.1	7.46	36.2	20	1.57	0.73	0.19	0.07	2.07	0.3	4	15.05	4.3	0.74	16.6	0.07	1.4	0.032	2.67	1	14.7	0.04	314	0.24	3.55	25	1.3	1720	12.8	354			0.11
ERE	69676	Glen Wills Peg	EL006277	548221	5918479	1362		25	PEG	PEG			Helitarget H39. 100x60m dyke. Sampled over 25m in core of outcrop. Grainisze 1-40mm, dominantly 2-10mm. Quartz, feldspar, muscovite. Common to abundant tourmaline. Strongly to moderately weathered. Rare garnet.	CHIP		AD18323999		7.72	10.9	40	1.2	0.63	0.19		2	0.4	5	10.4	3.5	0.73	15.35	0.09	0.8	0.035	3.72	1.1	3.1	0.05	159	0.25	3.13	17.9	0.7	1250	15.6	366			0.05
ERE	69677	Glen Wills Peg	EL006277	548142	5918407	1343		12	PEG	PEG			50m west of helitarget H39. 30x12m dyke sampled over 12m. Grainsize 2-90mm, dominantly 3-20mm. Quartz, feldspar, muscovite, common tourmaline. Moderately to strongly weathered.	CHIP		AD18323999	0.02	7.86	47.2	50	1.06	0.67	0.18		2.2	0.7	5	15.7	2.3	0.71	16.65	0.07	0.9	0.049	3.73	1.5	3.8	0.05	118	0.21	3	13.5	1.3	1270	11.8	449			0.07
ERE	69678	Glen Wills Peg	EL006277	548328	5918451	1381		30	PEG	PEG			55x30m dyke. Sampled ober 30m. Grainsize 2-150mm, dominantly 2-20mm. Quartz, feldspar, muscovite, minor garnet, common tourmaline. Moderately to strongly weathered	CHIP		AD18323999	0.03	7.34	23.2	20	1.32	0.49	0.12	0.03	1.76	0.2	3	14.1	3.2	0.58	20.7	0.08	1.2	0.05	2.47	0.8	14	0.03	394	0.2	3.02	35.6	0.8	1090	6.9	460			0.1
ERE	69679	Glen Wills Peg	EL006277	548343	5918376	1327		0.5	QTZ			QTZ	20cm wide quartz vein with 1mm thick pyrite laminations at Helitarget 37	GRAB		AD18323999
ERE	69680	Glen Wills Peg	EL006277	548347	5918371	1325		25	PEG	PEG			Helitarget H37. 10x40m dye. Sampled at northwest end over 25m. Quartz, feldspar, muscovite, common tourmaline. Grainsize 1-100mm, dominantly 2-15mm. Moderately to strongly weathered.	CHIP		AD18323999	0.01	7.15	68.4	80	1.23	1.06	0.21		3.16	0.4	4	4.08	5.6	0.67	17	0.08	1.3	0.026	2.67	1.4	5	0.06	134	0.18	3.24	19	1.5	1300	9.2	272			0.08
ERE	69681	Glen Wills Peg	EL006277	548369	5918313	1304		1	PEG	PEG			Grab sample near Southeast end of dyke. Possible petalite crystals 400-800mm.	CHIP		AD18323999	0.01	7.19	48.6	70	1.1	1.32	0.06		0.52	0.3	4	15.45	7.1	0.53	15.45	0.09	0.2	0.023	5		4.7	0.01	61	0.22	2.32	21.4	0.5	1720	12.4	670			0.13
ERE	69682	Glen Wills Peg	EL006277	548354	5918311	1302		30	PEG	PEG			Chip sample over 30m. H37. Quartz, feldspar, muscovite. Feldspars up to 1.2 m long. Grainsize 1-1200mm, dominantly 3-40mm. Strongly weathered.	CHIP		AD18323999	0.05	7.28	57.7	70	0.9	0.99	0.16		2.25	0.4	4	8.8	4.8	0.58	16	0.08	0.8	0.036	3.69	1.1	5.7	0.04	99	0.2	2.76	13.9	0.7	1250	13.8	400			0.07
ERE	69683	Glen Wills Peg	EL006277	548385	5918652	1403		15	PEG		PEG		Sucropping dyke beside Knocker Link Track. 60x25m, sampled over 15m. Quartz, feldspar, muscovite. Abundnat tourmaline, minor garbnet. Moderately to strongly weathered. Grainisze 1-400mm, dominantly 2-30mm.	CHIP		AD18323999	0.02	7.63	1000	30	1.17	1.32	0.14	0.03	2.15	0.3	6	18.65	3	0.98	16.9	0.07	1.3	0.027	3.57	1	6.4	0.03	316	0.29	3.06	14.9	0.7	1370	11.3	510		0.03	0.34
ERE	69684	Glen Wills Peg	EL006277	548301	5918672	1409		20	PEG		PEG		Subcropping dyke and float beside Knocker Link Track. 30x35m. Grainisze 1-200mm, dominantly 2-20mm. Quartz, feldspar, muscovite, abundant tourmaline. Strongly weathered. sampled over 20m.	CHIP		AD18323999	0.01	7.85	41.4	40	1.76	1.39	0.1		0.98	0.4	4	35.4	5.1	0.7	18.7	0.07	0.7	0.021	3.45	0.5	8.2	0.02	262	0.26	3.09	41.6	1.5	1890	10	630			0.13
ERE	69685	Glen Wills Peg	EL006277	546820	5919271	1406		5	PEG	PEG			10x5m. Pegmatite dyke southwest of BIG30. Sampled over 5m. Grainsize 5-80mm, dominantly 15-25mm. Quartz, feldspar, muscovite, abundant tourmaline. Moderately to strongly weathered.	CHIP		AD18323999	0.03	4.95	21.1	20	1.03	0.77	0.09		1.27	0.4	6	16.05	2.8	0.72	17.45	0.09	0.8	0.104	1.66	0.6	24.5	0.04	158	0.27	1.77	26.4	0.9	650	5.4	251			0.16
ERE	69686	Glen Wills Peg	EL006277	546826	5919308	1424		20	GRN PEG	GRN PEG			BIG30. Top of granite/granitic pegmatite dyke. Sampled over 20m. Quartz, feldspar, muscovite, abundant fine tourmaline. Grainsize 2-60mm, dominantly 2-10mm. Quartz veins 10-50cm thick, forming % of the outcrop. Common to minor garnet. Moderately to strongly weathered.	CHIP		AD18323999	0.03	7.16	17.3	10	0.68	0.67	0.13		1.94	0.3	5	10.35	1.8	0.73	14.65	0.07	0.6	0.053	3.98	1	6.2	0.03	214	0.26	2.58	10	0.5	1120	20.7	379			0.07
ERE	69687	Glen Wills Peg	EL006277	546782	5919296	1401		30	GRN PEG	GRN PEG			BIG30. Base of granite/granitic pegmatite dyke. Sampled over 30m. Quartz, feldspar, muscovite, abundant fine tourmaline. Grainsize 2-60mm, dominantly 2-10mm. Quartz veins 10-50cm thick, forming % of the outcrop. Common to minor garnet. Moderately to strongly weathered.	CHIP		AD18323999	0.05	6.75	35.6	30	0.69	0.78	0.17	0.08	7.62	0.4	4	9.99	2.9	0.61	14.4	0.1	1	0.042	3.14	3.8	7.5	0.06	300	0.18	2.85	9.1	1	1180	15.3	305			0.09
UNK	69688	Glen Wills Peg	OUT	542048	5927874	1335		12	PEG	PEG			Omeo highway. 12x30m dyke striking 321 deg. Grainsize 1-150mm, dominantly 2-20mm. Quartz, feldspar, muscovite. Moderately to strongly weathered.	CHIP		AD18323999		7.73	56	20	4.62	0.4	0.18		0.48	0.2	3	59.7	1.8	0.59	26.8	0.07	1.5		2.54		25.5	0.01	309	0.16	2.91	69.9	0.4	1810	9.8	1070			0.12
UNK	69689	Glen Wills Peg	OUT	542169	5927349	1363		8	PEG	PEG			Omeo highway. 45x8m dyke. 50m uphill from road. Sampled over 8m. Striking 328deg. Grainsize 2-150mm, dominantly 10-90mm. Quartz, feldspar, muscovite. Strongly weathered. Minor to common tourmaline and garnet.	CHIP		AD18323999	0.05	7.92	6.1	40	3.09	1.12	0.16		2.19	0.3	6	30.8	3.8	0.82	25.1	0.08	0.9	0.027	4.19	1	96.3	0.03	431	0.3	2.57	50.6	0.7	2100	12.7	1090			0.09
UNK	69690	Glen Wills Peg	OUT	542183	5927409	1338		4	PEG	PEG			12m long x 4m high outcrop in road cut on Omeo Highway. Sampled over 4m. Quartz, feldspar, muscovite. Grainsize 1-35mm, dominantly 2-10mm. Moderately to strongly weathered.	CHIP		AD18323999	0.04	7.69	6.7	80	3.8	1.05	0.16	0.2	2.15	1	4	37.4	5.1	0.74	24.4	0.08	1.2	0.008	3.35	1	76.5	0.02	1010	0.24	2.6	63.7	1.4	2080	13.9	980			0.12
ERE	69691	Glen Wills Peg	EL006277	546576	5922687	1152		4	PEG	PEG			Knocker track near omeo highway intersection. 4x10m dyke. Grainsize 5-70mm, dominantly 10-30mm. Quartz, feldspar, muscovite, common tourmaline (schorl). Possible amblygonite. Strongly weathered	CHIP		AD18323999	0.05	8.13	8.9	150	3.55	1.28	0.08		4.12	1	4	38	2.9	0.55	23.2	0.08	1.5	0.024	3.3	2.8	62.3	0.05	171	0.15	2.76	36.9	3	1090	23.8	790			0.12
ERE	69692	Glen Wills Peg	EL006277	547813	5916480	1307		9	PEG	PEG			Granitic pegmatite. Knocker track road cutting. 9m wide. Grainsize 2-40mm, dominantly 5-20mm. Quartz, muscovite, feldspar, abundant tourmaline (schorl). Plumerose muscovite. Moderately to strongly weathered. Quartz veins up to 50 cm wide forming less than 1% of the outcrop.	CHIP		AD18323999	0.01	7.47	1.7	30	1.29	0.27	0.16		11.25	2.6	6	2.65	1.4	0.61	15.15	0.08	1	0.05	0.98	9.2	5.1	0.19	63	0.19	3.54	10.8	3.9	590	4	78.5			0.05
ERE	69693	Glen Wills Peg	EL006277	547865	5916104	1285		10	PEG	PEG			10m wide pegmatite in road cutting on Knocker track. Grainisze 2-90mm, dominantly 5-20mm. Quartz, feldspar, muscovite, abundant tourmaline (schorl). Moderately to strongly weathered.	CHIP		AD18323999		7.47	2.5	30	1.02	0.29	0.21		8.92	2.2	4	3.08	1.6	0.41	13.3	0.08	0.6	0.028	0.79	5.2	3.9	0.06	77	0.13	4	18.9	3.5	590	6.1	66.1
ERE	69694	Glen Wills Peg	EL006277	546977	5916969	1369		8	PEG	PEG			Helitarget BIG31. 20x8m. Sampled over 8m. Quartz veins 50 x 300 cm making up 20% of the outcrop. Feldspar, muscovite, quartz. Abundant tourmaline (schorl) upt ot 5cm. Grainsize 5-1200mm, dominantly 30-200mm. Strongly to moderately weathered.	CHIP		AD18323999		6.79	4	20	1.86	0.75	0.1		2.48	0.4	2	63	1	0.54	27.1	0.07	1	0.164	3.31	1.5	8.8	0.04	221	0.1	1.64	174	0.2	850	7.7	610			0.33
ERE	69695	Glen Wills Peg	EL006277	547127	5920553	1361		20	GRN PEG	GRN PEG			Beside Knocker track near lanman track intersection. 40x20m dyke striking 321deg. Sampled over 20m. Grainsize 2-50mm, dominantly 5-15mm. Quartz, feldspar, muscovite. Abundant tourmaline (schorl). Strongly to moderately weathered.	CHIP		AD18323999	0.02	7.42	35.3	100	0.81	0.61	0.15		1.97	0.2	3	7.74	3	0.61	17.25	0.08	0.7	0.079	4.44	1	5.7	0.05	108	0.19	2.4	16.3	0.4	1500	17.4	421			0.09
UNK	69696	Glen Wills Peg	OUT	544553	5923057	1192		6	PEG	PEG			Omeo highway. 6m wide outcrop in road cutting. Grainsize 1-20mm, dominantly 2-15mm. Quartz, feldspar, muscovite. Exceptionally weathered. Feldspar becoming clay. Granitic pegmatite	CHIP		AD18323999		8.33	30.8	30	5.8	0.74	0.07		1.82	1.1	4	60.9	1.4	0.51	23.5	0.07	2.5		1.96	1	28	0.03	154	0.16	3.63	68.4	1.2	2010	10.2	790			0.12
MIRE	69699	Dorchap Peg	EL5315	524327	5947676	1033		1	PEG	PEG			1x4m pegmatite in road plus float blocks nearby. Quartz, feldspar, muscovite. Grainsize 5-100mm, dominantly 10-40mm. Strongly to moderatley weathered.	CHIP		AD19024693	0.03	8.95	14.8	70	9.23	1.6	0.09	0.06	3.11	2.1	3	25.7	14	0.5	27.1		1.2	0.016	2.62	1.9	53.6	0.07	436	0.21	2.33	80.9	6.1	2160	30.3	660			2.29
MIRE	69700	Dorchap Peg	EL5315	524576	5946686	1004		1	PEG	PEG			1m wide dyke exposed in road cutting. Quartz, muscovite, feldspar. 5-50mm grainsize, dominantly 10-30mm. Moderately weathered .	CHIP		AD19024693		8.04	12.7	30	6.22	0.43	0.09		2.65	1.4	5	29.1	12	0.82	22.8		2.2		1.5	1.3	10.2	0.05	851	1.36	3.9	73.4	2.2	1290	22.5	399			0.1
MIRE	69701	Dorchap Peg	EL5315	525332	5945406	1027		1	PEG	PEG			1x7m dyke in road. Grainsize 2-70mm, dominantly 10-20mm. Quartz, fledspar, muscovite. Moderately to strongly weathered.	CHIP		AD19024693	0.01	8.4	12.3	30	4.05	1.74	0.06		1.78	0.5	5	25.8	8.3	0.62	23.5		2.2		1.75	0.8	17.5	0.03	361	0.29	4.44	78.6	1.2	1120	18.8	550			0.08
MIRE	69702	Dorchap Peg	EL5315	525852	5945277	1032		6	APLITE	APLITE			6m wide aplite outcrop in road cutting. Quartz and feldspar. Grainisze mm. Exceptionally weathered to strongly weathered.	CHIP		AD19024693	0.07	9.09	2	350	2.46	0.43	0.01		61.1	3.7	2	3.9	6.2	1.07	21.3	0.05	3.8	0.046	2.17	32.4	18.9	0.05	84	0.63	0.63	12.1	9.5	110	22.1	142			0.37
SRE	69747	Dorchap Peg	EL006277	546362	5920357	1291		8	GRN PEG	GRN PEG			Granitic pegmatite 70m north of 353. Muscovite, quartz, feldspar. Grainsize 2-20mm, dominantly 5-15mm. Rare biotite. Moderately weathered. Chipped over 8m.	CHIP		AD19027922	0.04	7.27	12.9	80	1.13	3.16	0.28	0.02	12.65	0.6	4	15.95	1.9	0.62	18.85		0.9	0.11	3.24	6.2	14.2	0.05	158	0.14	2.3	11.8	1.3	720	24.2	303			0.28
SRE	69748	Dorchap Peg	EL006277	547420	5917848	1330		10	GRN PEG	GRN PEG			Helitarget H411. Granitic pegmatite striking 240deg. Chipped over 10m. Grainsize 2-40mm, doinantly 5-10mm. Quartz, feldspar, muscovite, common schorl. Strongly weathered.	CHIP		AD19027922	0.01	7.38	8.2	110	0.62	0.77	0.22	0.02	6.18	0.9	6	5.2	7.5	0.69	15.2		0.5	0.04	3.85	3.5	2.7	0.1	229	0.19	2.54	10.8	2	760	24.9	215			0.06
SRE	69749	Dorchap Peg	EL006277	547499	5921173	1295		6	PEG	PEG			Bluejacket dyke. Small drive on east side of road. Chipped over 6m. Quartz, feldspar, muscovite, possible a\mbligonite, rare cassiderite. Fresh sample.	CHIP		AD19027922	0.04	8.68	8.8	70	2.81	0.41	0.05		3.42	4.2	3	191	2.9	0.49	23.3	0.05	0.4	0.02	5.07	2.1	68.4	0.09	89	0.19	1.73	26.2	1.4	1940	8.6	1200			0.43
SRE	69750	Dorchap Peg	EL006277	547399	5921260	1245		12	PEG	PEG			Downhill, base of Bluejactet dyke. Sampled over 12m. Quartz, feldspar, muscovite. Minor to common lepetilite. Possible ambligonite. Rare bluejacket tourmaline. Moderately to strongly weathered. Grainsize 5-400mm, dominantly 10-50mm.	CHIP		AD19027922	0.04	6.08	20.6	10	7.2	0.25	0.34		2.06	0.5	5	316	1.3	0.68	26.6		1.9	0.013	1.52	1	700	0.03	492	0.21	2.52	137	1.2	2510	5.5	1080			0.74
SRE	69753	Dorchap Peg	EL006277	545594	5917283	1334		5	PEG	PEG			5m wide pegmatite. Grainsize 1-70mm diameter, dominantly 2-15mm. Quartz, fledspar, muscovite, common biotite. Strongly weathered. Chipped across 5m width.	CHIP		AD19027922	0.05	7.12	19.5	170	0.32	1.33	0.28		3.81	1.2	5	10.25	3.6	0.7	14.7		0.5	0.016	4.87	2.3	9.3	0.08	115	0.2	1.54	6.7	2.6	730	51.9	237			0.09
SRE	69755	Dorchap Peg	EL006486	531772	5944062	576		8	PEG	PEG			8m wide pegmatite dyke. Grainsize 2-60mm, dominantly 5-10mm. Abundant quartz veins, 1-2cm wide forming 5% of outcrop. Quartz, fledspar, muscovite. Sampled across 8m.	CHIP		AD19027922	0.02	7.7	7.6	50	105	0.24	0.12		1.29	0.5	4	25.9	2.2	0.47	23.4		0.8		1.57	0.6	850	0.02	384	0.21	4.57	50.5	2.4	1400	14.5	500			0.07
SRE	69756	Dorchap Peg	EL006486	531862	5944340	580		15	PEG	PEG			Helitarget PH5_7. 15x50m dyke. Quartz, feldspar, common to abundant muscovite. Grainisze 1-60mm, dominantly 5-20mm. Moderately weathered. Narrow intervals of aplite and sediment within dyke. Common quartz veins to 50cm wide forming 5% of outcrop. Sampled over 15m. Sediment strike dip = 320/SW/82	CHIP		AD19027922	0.01	7.9	33.3	160	67.3	0.13	0.15		2.98	0.7	5	52.6	1.2	0.43	21.1		1.3		2.46	1.5	86.8	0.04	165	0.12	3.82	68.9	1.2	1350	23.3	600			0.07
SRE	69757	Dorchap Peg	EL006486	532226	5944800	537		15	PEG	PEG			25m wide dyke, sampled on the south side over 15m. Quartz, feldspar, muscovite. Rare possible petalite. Moderately to strongly weathered. Grainsize 1-200mm diameter, dominantly 2-5mm. Helitarget PH5_6	CHIP		AD19027922	0.02	8.16	4.3	60	106	0.22	0.32		1.26	0.3	3	42.1	1.3	0.47	24.4		1.1		2.71	0.8	167	0.01	151	0.14	2.83	119.5	1.6	2420	17.9	860			0.1
SRE	69758	Dorchap Peg	EL006486	532232	5944815	537		10	PEG	PEG			25m wide dyke, sampled on the north side over 10m. Quartz, feldspar, muscovite. Rare possible petalite. Moderately to strongly weathered. Grainsize 1-180mm diameter, dominantly 5-20mm. Helitarget PH5_6	CHIP		AD19027922	0.01	8.05	2.9	50	15.6	0.26	0.06		0.47	0.4	3	30	1.9	0.5	16.45		0.5		3.11		1910	0.01	157	0.24	2.52	39.9	1.8	1390	13.5	620			0.09
SRE	69759	Dorchap Peg	EL006486	532250	5944767	543		5	PEG	PEG			5m wide pegmatite near river bend. Sampled over 5m. Quartz, feldspar, muscovite. Moderately weathered. Grainisze 1-20mm, dominantly 2-5mm.	CHIP		AD19027922	0.02	7.71	6.9	50	90.2	0.26	0.24		0.54	0.4	4	35.6	1	0.48	27.4		0.3		2.43		184.5	0.01	124	0.16	2.65	68.1	1.1	1730	13.9	800			0.08
SRE	69760	Dorchap Peg	EL006486	532340	5944736	585		5	PEG	PEG			5m wide pegmatite at helitarget PH5_5. 1m wide quartz vein 4m NE of dyke. Grainsize 1-20mm, dominantly 2-10mm. Quartz dominant, feldspar, muscovite. Moderately to strongly weathered. Sampled over 5m.	CHIP		AD19027922	0.02	7.55	30.9	30	61.2	0.23	0.13		3.46	0.5	4	37.4	1.2	0.39	22.1		1.2	0.03	1.54	1.8	48.3	0.02	262	0.13	4.05	66.9	1.5	1190	12.5	620			0.07
SRE	69761	Dorchap Peg	EL006486	532123	5944927	534		5	PEG	PEG			5m wide pegmatite in riverbank sampled over 5m. Grainsize 1-20mm, dominantly 2-5mm diameter. Quartz, feldspar, muscovite. Quartz veins upto 5cm thick forming % of the outcrop. Sediment strike dip 154/E/80	CHIP		AD19027922	0.01	5.3	2	20	101.5	0.5	0.06		0.33	0.4	4	33	3	0.47	14.95		1.6		1.29		345	0.01	97	0.26	2.18	43.4	1.3	900	14.8	421			0.11
SRE	69762	Dorchap Peg	EL006486	532069	5944953	545		6	PEG	PEG			Helitarget PH5_4. 20x 6m pegmatite dyke sampled over 6m. Quartz, feldspar, muscovite. Strongly weathered. Abundant quartz, minor muscovite, grainisze 1-70mm, dominantly 2-5mm. Possible petalite upto 60mm diameter.	CHIP		AD19027922	0.05	6.47	1540	20	50.2	6.88	0.05	0.13	0.53	0.2	3	21.1	0.7	0.5	14.55		1.4	0.012	1.94		178	0.01	202	0.14	3.54	64.5	0.6	1250	15.5	530		0.04	0.23
SRE	69763	Dorchap Peg	EL006486	531833	5944569	624		7	PEG	PEG			7m wide dyke. Grainsize 1-20mm, dominantly 2-5mm. Quartz, fledspar, minor muscovite. Strongly weathered.	CHIP		AD19027922	0.01	7.66	3.7	10	15.8	0.68	0.06	0.35	0.94	0.2	4	27.3	0.7	0.59	22.7		0.8		2.33		88.7		780	0.17	3.68	72.8	0.8	1510	12.2	640			0.06
MMD	69767	Mullengendra Peg	ELA5703	524091	6025248	577		7	PEG	PEG			Fine grained aplitic, with K-feldspar, mica, quartz. Mod. weathered. Boulders (generally 4x3 m exposed). Sharp contacts with Sed to North and Sed Flt to south - appears to lens out both ends.	CHIP		AD19027922	0.01	7.79	36.9	40	110.5	0.68	0.14		3.48	0.3	5	183	2.9	0.49	17.1	0.07	0.9		2.34	2	4180	0.02	278	0.32	3.04	69.2	1.3	1820	16.3	1180		0.01	0.54
MMD	69768	Mullengendra Peg	ELA5703	524133	6025234	586		10	PEG	PEG			Fine grained aplitic, with K-feldspar, mica, quartz. Mod. weathered. Boulders (generally 4x3 m exposed). Sharp contacts with Sed to North and Sed Flt to south - appears to lens out both ends.	CHIP		AD19027922		7.55	10.7	20	112.5	0.54	0.1		0.92	0.3	5	162	1.4	0.58	18.1	0.06	1.4		2.41		3320	0.01	321	0.26	3.2	69.4	0.5	1820	16.3	1270			0.19
MCRE	69799	Dorchap Peg	EL006486	525504	5941033	913		4	PEG	PEG			Pegmatite in road cutting sampled across 4m. Scattered subcrop and outcrop. Outcrop striking 333deg. Grainsize 5-25mm, dominantly 10-15mm. Quartz, fledspar, muscovite, common tourmaline (schorl). Feldspar dominant. Strongly weathered.	CHIP		AD19055167	0.03	7.47	124	50	1.35	0.62	0.11		6.58	0.7	7	8.67	8.5	0.76	15.9		1.1	0.02	3.14	3.4	7.4	0.05	220	0.29	2.2	10.3	2.6	790	21.7	244		0.01	0.11
MCRE	69800	Dorchap Peg	EL006486	525278	5940763	961		6	PEG	PEG			Pegmatite in road cutting sampled across 6m. Quartz, feldspar, muscovite, common tourmaline. Grainisze 2-45mm, dominantly 5-10mm. Strongly weathered.	CHIP		AD19055167	0.03	6.89	25.4	20	0.75	1.12	0.08	0.02	5.2	1.1	8	10.7	5.6	0.8	15.6	0.05	0.8	0.032	3.84	3.5	13.9	0.05	392	0.56	1.56	9.7	4.9	470	32.1	299		0.01	0.1
MCRE	69801	Dorchap Peg	EL006486	526914	5944811	906		3	PEG		PEG		3m wide pegmatite subcrop on the SEC track. Chipped over 3m. Grainsize 10-50mm, dominantly 20-30mm. Quartz, feldspar, muscovite. Dominanted by quartz and muscovite. Moderately to strongly weathered.	CHIP		AD19055167	0.02	8.11	25.9	30	27.7	0.95	0.05	0.11	0.88	0.6	6	38.9	5.6	0.55	25.3		1.5	0.012	1.96		27.2	0.01	475	0.6	4.04	42.2	2.8	1330	25.3	620			0.12
MCRE	69802	Dorchap Peg	EL006486	531439	5947319	568		4	PEG		PEG		2x4m pegmatite at PH5_1. Sampled across whole outcrop. Subcropping pegmatite. Quartz, feldspar, muscovite. Grainsize 5-20mm, dominantly 10-15mm. Strongly weathered.	CHIP		AD19055167	0.03	7.6	3.5	10	8.86	0.59	0.03		5.04	0.4	6	50	3.6	0.54	21.8		0.3		3.18	3.7	62.2	0.01	293	0.29	2.82	52.3	1.8	810	13	1020			0.38
MCRE	69841	Mt Wills Granite	EL006486	537728	5936375	888		8	GRN PEG	GRN PEG			Granitic pegmatite in road cutting. 8m wide, chipped over 8m. Crystals 5-60 mm diameter, dominantly 10-12mm. Quartz, feldspar, biotite, muscovite. Strongly weathered.	CHIP		AD19064170	0.04	7.36	4.6	160	2.05	2.26	0.21		32.6	3.3	12	19.4	9	1.83	20.2	0.06	2.5	0.069	3.65	15.8	35	0	368	0.37	1.85	16.6	4.4	590	34.5	291		0.01	0.14
MCRE	69842	Dorchap Peg	EL006486	533980	5940710	1233		7	PEG	PEG			20x10m dyke sampled across 7m. Granitic pegmatite. Quartz, feldspar, muscovite. Crystals 2-100mm, dominantly 5-10mm diameter. Strongly weathered. Sampled at northern end.	CHIP		AD19064170	0.04	7.53	14.4	10	2.53	1.21	0.08	0.5	1.15	0.8	6	30.1	8.3	1.1	30		0.5	0.02	2.92	0.6	76	0	1160	0.44	2.78	85.6	2	2350	6.7	770		0.01	0.12
MCRE	69843	Dorchap Peg	EL006486	533965	5940910	1223		10	PEG	PEG			20x10m dyke sampled across 10m. Same dyke as previous. Sampled at southern end. Granitic pegmatite. Quartz, feldspar, muscovite. Crystals 2-100mm, dominantly 5-10mm diameter. Strongly weathered.	CHIP		AD19064170	0.06	7.29	28.7	10	2.36	0.87	0.08	0.18	0.72	0.5	7	37.4	8.7	0.83	24.7		0.4	0.021	3.19		52	0	887	0.36	3.1	46.9	1.5	2130	8.3	730		0.01	0.11
MCRE	69844	Dorchap Peg	EL006486	533816	5940374	1198		5	PEG	PEG			5m wide pegmatite dyke on old forestry track. Crystals 2-40mm, dominantly 3-10mm. Quartz, feldspar, muscovite. Strongly weathered.	CHIP		AD19064170	0.07	6.69	15	50	1.97	0.91	0.07	0.17	1.63	1	10	37.1	12.7	0.75	19.3		1	0.018	4.5	0.8	25	0	234	0.61	1.92	32.1	5.7	1440	13.6	820		0.01	0.12
MCRE	69845	Dorchap Peg	EL006486	533794	5940063	1273		8	PEG	PEG			8x20m dyke. Pegmatite. Sampled over 8m. Quartz, feldspar, muscovite. Large feldspars upto 400 mm, strongly weathered.	CHIP		AD19064170		8.17	12.5	20	378	0.87	0.04		0.61	0.4	4	312	3.3	0.62	29.8	0.05	2.7	0.016	6.21		1020	0	643	0.2	1.86	977	1.5	1560	14.7	1740		0.01	0.19
MCRE	69846	Dorchap Peg	EL006486	534144	5939933	1165		5	PEG	PEG			5m wide pegmatite at end of unmarked forestry track. Strongly weathered, Quartz, feldpsar, muscovite. 5-80mm diamter, dominantly 10-20mm.	CHIP		AD19064170	0.1	7.51	16.5	30	3.74	0.28	0.06		0.65	0.5	5	54.4	8.5	0.64	20.7	0.05	0.5	0.028	6.1		50	0	104	0.36	1.81	27.4	1.9	1940	19.4	1060			0.19
MCRE	69847	Dorchap Peg	EL006486	534172	5939828	1143		5	PEG		PEG		5m wide pegmatite subcrop. Strongly weathered. Quartz, feldspar, muscovite, tourmaline. 1-20mm diamter, dominantly 2-10mm.	CHIP		AD19064170	0.08	7.1	65.6	20	2.96	0.8	0.15	0.28	2.37	1.1	8	23.5	6.2	1.05	19	0.05	1.4	0.024	1.94	1.1	48	0	1080	0.44	3.42	17.3	2.3	1470	10.6	325		0.01	0.24
MCRE	69848	Dorchap Peg	EL006486	534185	5939803	1145		15	PEG	PEG			Continuation of same pegmatite sampled at 69847. 50x15m dyke. Sampled over 15m. Quartz, fledspar, muscovite, common tourmaline. Crystals 2-70mm, dominantly 10-20mm. Moderately to strongly weathered.	CHIP		AD19064170	0.04	6.79	54.6	10	2.37	0.76	0.13	0.07	1.21	0.4	6	18.8	4.9	0.69	15.95	0.05	0.9	0.014	2.28	0.5	25	0	354	0.3	3.85	10.2	1.5	1380	14.7	327		0.01	0.15
MCRE	69849	Dorchap Peg	EL006486	534273	5939835	1102		7	PEG	PEG			Very large dyke approx 15x 30m and 20m high. Quartz, tourmaline, feldspar, muscovite. Crystals 1-150mm, dominantly 2-5mm. Moderately to strongly weathered. Sampled over 7 m on western side	CHIP		AD19064170	0.04	6.92	18.7	10	1.91	0.32	0.05	0.16	0.6	0.2	3	51.8	2.7	0.6	15.35	0.05	0.5	0.008	4.46		89	0	1010	0.21	2.55	10.3	1.2	1470	12.8	810			0.29
MCRE	69850	Dorchap Peg	EL006486	534284	5939835	1102		10	PEG	PEG			Very large dyke approx 15x 30m and 20m high. Quartz, tourmaline, feldspar, muscovite. Crystals 1-150mm, dominantly 2-5mm. Moderately to strongly weathered. Sampled over 10 m on eastern side	CHIP		AD19064170	0.07	7.35	23.1	10	2.26	0.32	0.06	0.12	0.65	0.4	7	54.8	5.2	0.8	21.1		0.6	0.028	4.34		132	0	970	0.38	2.53	21.6	1.6	1420	12.1	810		0.01	0.27
ERE	69879	Glen Wills Peg	EL006277	546365	5923198	1086		2	APL PEG	APL PEG			Alpitic pegmatite. Quartz and feldspar rich. Pale green greissenised material. Crystals 1-2mm diameter with 40mm diameter quaryz blebs and 1cm thick quartz veins. Sampled along 2m along drive at very end.	CHIP
ERE	69880	Glen Wills Peg	EL006277	546377	5923200	1086		3	PEG	PEG			Pegmatite. 1-20 mm diameter crystals. Quartz, fledspar, muscovite. Quartz and feldspar dominant. Possible cassiderite. Pale green 1mm diameter greissenised material.	CHIP
ERE	69881	Glen Wills Peg	EL006277	546353	5923354	1079		5.5	PEG	PEG			Pegmatite 10-25mm diamter crystals. Quartz, feldspar, muscovite. Quartz and feldspar dominant.	CHIP
ERE	69882	Glen Wills Peg	EL006277	546366	5923365	1113			PEG			PEG	Grab sample from fall material beneath stopes and ore chutes. 20-30mm diameter crystals. Quartz and feldspar domianted	GRAB
ERE	69883	Glen Wills Peg	EL006277	546364	5923264	1113		2.5	PEG	PEG			2.5m wide chip sample across brow of stope. 20-30mm diameter crystals. Quartz and feldspar domianted. Minor muscovite. Rare possible cassiderite.	CHIP
ERE	69884	Glen Wills Peg	EL006277	546336	5923342	1113		0.7	PEG	PEG			0.7m wide chip sample of soft, altered pegmatite. Quartz, feldspar, muscovite. Faulted with Fe and Mn stains along fault planes. Most feldspar altered towards clay.	CHIP
ERE	69885	Glen Wills Peg	EL006277	546373	5923325	1147		4	PEG	PEG			Pegmatite chip sampled across 4m. Chalky feldspathic and quartzose pegmatite. Minor to rare muscovite. Rare cassiderite. Crystals 20-400mm diameter. Grieseenous, porous texture to quartz.	CHIP
ERE	69886	Glen Wills Peg	EL006277	546388	5923345	1141			PEG			PEG	Mullock sample from mullock heap of apx 50m deep shaft dipping at 75 deg. Dominant;ly clay altered feldspar, with selveges of sericite greissen. Cassiderite minor. Possible ambligonite. Dominantly comprised of altered feldspar/ambligonite. Some highly silicifed silica flood and muscovite.	GRAB
ERE	69887	Glen Wills Peg	EL006277	546378	5923351	1142			PEG			PEG	Mullock sample - last ore dump from shaft? Abundant cassiderite, and apx 1% iron phosphate. Possible ambligonite. Weathered feldspar dominant. Muscovite common. Crystal size 1-10mm diameter. Sericite common.	GRAB
ERE	69888	Glen Wills Peg	EL006277	546886	5919824	1412		12	GRN_PEG	GRN_PEG			Granitic pegmatite 12x25m. Chipped over 12m. Quartz, feldspar, muscovite. Abundant tourmaline. Crystal size 4-90mm, dominantly 4-12mm. Moderately to strongly weathered. Iron staining prevalent. Outcrop strike 290deg, Quartz veins up to 10 cm thick forming % of the outcrop. Plumerous muscovite present.	CHIP		AD19179452	0.01	6.1	33.4	40	0.91	1.65	0.17		2.27	0.4	5	8.89	9	0.62	16.85		0.6	0.07	2.94	1.1	9.5	0.08	87	0.48	2.04	17.7	2.3	850	15.1	298		0.01	0.12
ERE	69889	Glen Wills Peg	EL006277	547227	5921510	1266		2	GRN_PEG	GRN_PEG			Granitic pegmatite. Crystal size 2-40mm, dominantly 4-10mm. Quartz, feldspar muscovite, abundnant tourmaline. Quartz and feldspar dominant. Moderately to strongly weathered. 274/N/66 - pegmatite. Quartz veins >20cm thick, forming % of outcrop. 2x3 m outcrop chipped over 2 m.	CHIP		AD19179452	0.06	6.9	74.2	20	1.69	1.35	0.14		1.91	0.4	4	19.95	6.6	0.6	19.1		1.3	0.042	2.99	1.4	11.8	0.05	685	0.52	2.87	23.6	3.6	1080	13.2	412			0.12
ERE	69890	Glen Wills Peg	EL006277	547231	5921516	1264		20	GRN_PEG			GRN_PEG	Granitic pegmatite. Crystal size 2-40mm, dominantly 4-10mm. Quartz, feldspar muscovite, abundnant tourmaline. Quartz and feldspar dominant. Moderately to strongly weathered. 274/N/66 - pegmatite. Quartz veins >20cm thick, forming % of outcrop. Float sampled over 20m area	GRAB		AD19179452	0.04	6.97	60.1	20	1.74	1.23	0.11		3.36	0.6	5	16.65	8.8	0.61	18.95	0.05	1.1	0.048	2.69	2.7	11.6	0.06	354	0.54	2.79	20.8	3	1070	14.1	365			0.14
ERE	69891	Glen Wills Peg	EL006277	547061	5921617	1274		5	PEG	PEG			Pegmatite. 20x5m. Chipped over 5m. Quartz, feldspar, muscovite. Crystals 2-30mm, dominantly 5-10mm. Some large books of muscovite and plumerous muscovite. M<oderately weathered. Some possible ambligonite. Occasional 1-5mm garnets. Outcrop strikes 302deg, 285/S/84 sediment-peg contact on south edge of dyke.	CHIP		AD19179452	0.03	7.08	7.9	60	3.15	0.39	0.15	0.02	1.41	0.8	5	35.5	5.4	0.53	22.7	0.06	0.7	0.005	2.48	1	49.8	0.04	488	0.46	3.29	47.2	1.8	1540	17	510			0.17
ERE	69892	Glen Wills Peg	EL006277	547712	5921518	1242		2	GRN	GRN			Granite. Dominated by pyroxene and potassium feldspar. 5x2m. Orange. Moderately weathered. Grainsize 1-10mm, dominantly/consistently 2-3mm. Quartz, k-spar, pyroxene.	CHIP		AD19179452	0.04	6.84	0.8	580	2.12	0.07	0.35	0.02	64.4	3.7	6	1.25	5	2.45	17.4	0.11	4	0.054	3.16	33.1	11.3	0.33	498	0.66	3.19	12.2	5.7	510	2.8	180.5
ERE	69893	Glen Wills Peg	EL006277	547836	5923064	1120		3	PEG		PEG		Pegmatite. Scattered subcrop over 3x10m. Chipped over 3m. Very quartz rich. Grainsize 2-300mm, dominantly 10-30mm. Quartz and feldspar laths to 300mm, contains quartz, feldspar, muscovite and minor sercite. Quartz veins up to 50cm thick forming 20% of outcrop. Strongly weathered	CHIP		AD19179452		6.76	9.2	30	3.34	1.02	0.05		1.31	0.7	3	26.5	6	0.38	20.4	0.06	0.8	0.008	3.57	0.6	7.5	0.01	276	0.37	2.9	45.3	2.4	1300	15.5	620			0.09
ERE	69894	Glen Wills Peg	EL006277	546622	5921524	1277		12	PEG	PEG			Pegmatite-granitic pegmatite. Quartz, feldspar, muscovite, tourmaline. Grainsize 3-20mm, dominantly 5-10mm. Strongly weathered. Quartz veins 2-5 cm forming 1% of outcrop. Chipped over 12m, 12x20m dyke. 312deg outcrop strike	CHIP		AD19179452	0.06	7.36	52.2	40	1.24	0.86	0.17	0.02	8.7	0.4	9	20.2	8.3	0.89	22.8	0.08	0.9	0.093	3.04	4.1	19.8	0.09	374	0.62	3.06	32.7	2	1400	11.8	412			0.2
ERE	69895	Glen Wills Peg	EL006277	546582	5921807	1239		8	PEG	PEG			Pegmatite. 35x8m outcrop. Chipped over 8m. Outcrop strike 310deg. Pegmatite 290/N/70. quartz, feldspar, muscovite, abundant tourmaline. Crystals 1-20mm, dominantly 5-12mm, Moderately to strongly weathered.	CHIP		AD19179452	0.04	6.76	47.9	30	1.54	0.7	0.18		3.07	0.3	3	15.75	4.9	0.48	19.45	0.06	0.6	0.045	2.54	1.4	19.6	0.04	231	0.41	3.07	23.1	1.7	1180	11.3	355			0.14
ERE	69896	Glen Wills Peg	EL006277	546560	5921965	1196		8	PEG	PEG			Pegmatite. Very siliceous. Quartz, feldspar, muscovite, abundant tourmaline up to 10mm diameter. Strongly weathered. Crystals 4-50mm, domiantly 5-30mm. Pegmatire 312/NE/72. 30x8m dyke sampled over 8m	CHIP		AD19179452	0.08	6.95	118.5	20	2.32	1.24	0.17		2.78	0.5	3	27.8	5.6	0.52	15	0.07	0.7	0.037	3.37	1.7	17.9	0.04	278	0.37	2.7	10.9	4.5	1100	21.3	353		0.01	0.42
ERE	69897	Glen Wills Peg	EL006277	546583	5921977	1200		3	PEG	PEG			Pegmatite. 4x3m outcrop. Grainsize 1-300mm, dominantly 10-30mm. Quartz, feldspar, muscovite, abundant tourmaline. Feldspars up to 300mm. Strongly weathered	CHIP		AD19179452	0.03	7.96	60.9	90	1.75	0.43	0.13		4.09	0.6	4	16.75	5.4	0.46	14.8	0.06	0.9	0.006	4.95	2	15.9	0.03	341	0.36	2.96	14	2	1580	30.5	470			0.25
ERE	69898	Glen Wills Peg	EL006277	546719	5921921	1269		7	PEG	PEG			Pegmatite. 20x7m. Chipped over 7m. Strongly weathered. Grainsize 2-30mm, dominantly 5-10mm. Quartz, feldspar, muscovite, abundant tourmaline. Outcrop strike 305deg.	CHIP		AD19179452	0.03	7	65	20	2.61	0.59	0.11	0.18	2.49	0.3	3	24.1	5.1	0.79	22	0.06	1.1	0.022	2.35	1.1	34.2	0.04	1400	0.5	3.01	32.6	1.9	1260	10.8	365			0.16
ERE	69899	Glen Wills Peg	EL006277	546678	5922431	1172		5	PEG	PEG			Pegmatite. 12x5m, chipped over 5m. Pegamtite = 266/N/57. Grainsize 2-100mm, dominatly 3-30mm. Quartz, feldspar, muscovite, common tourmaline. Strongly weathered.	CHIP		AD19179452	0.07	7	25.4	40	1.23	1.43	0.25	0.03	3.99	0.4	3	13.05	6.7	0.53	17.5	0.06	0.3	0.082	3.21	2.2	27	0.05	127	0.5	2.74	12.1	1.7	790	28.3	292			0.15
ERE	69900	Glen Wills Peg	EL006277	546883	5920288	1354		10	GRN_PEG	GRN_PEG			Pegmatite. 20x10m, chipped over 10m. Quartz, feldspar, muscovite, abundant tourmaline. Very siliceous. Grainsize 2-100mm, dominantly 5-50mm. Strongly weathered.	CHIP		AD19179452	0.05	6.88	12.6	40	0.97	1.24	0.11		2.42	0.5	6	14.75	8.5	0.63	19.3	0.07	0.9	0.082	3.3	1.2	21.4	0.04	191	0.58	2.5	18.5	2	960	17.5	354			0.18
ERE	69901	Glen Wills Peg	EL006277	546801	5920372	1314		20	GRN_PEG	GRN_PEG			Pegmatite. 300/N/86 - peg. Granitic pegmatite. Grainsize 1-30mm, dominantly 5-10mm. Quartz, feldspar, muscovite, abundant tourmaline. Moderately weathered. 20x40m, chipped over 20m.	CHIP		AD19179452	0.03	7.08	4	40	1.14	0.51	0.17	0.03	1.66	0.3	3	13.65	5.5	0.56	20.9	0.06	0.8	0.051	3.05	0.7	17.7	0.03	328	0.52	2.94	27.4	1.6	1360	10.1	402			0.13
SRE	69902	Dorchap Peg	EL006277	547202	5922859	1167		2.8	PEG	PEG			Pegmatite. Sub-outcrop exposed where old logging track has been bulldozed. FeOX aplitic texture, K-Spar, Tourmaline, weathered mica, 60%Plag/30% Qtz	CHIP	PEG	AD19179452	0.04	7.08	28.2	30	4.73	1.92	0.11		1.97	0.3	3	26.2	6.7	0.68	23.9	0.06	1.3	0.031	2.65	1	32.5	0.03	1090	0.56	3.12	31.4	2	1080	14.8	470			0.14
SRE	69903	Dorchap Peg	EL006277	547201	5922852	1167		3.5	PEG	PEG			Pegmatite. Sub-outcrop exposed where old logging track has been bulldozed. FeOX aplitic texture, K-Spar, Tourmaline, weathered mica, 60%Plag/30% Qtz	CHIP	PEG	AD19179452	0.03	7.04	12.4	20	8.34	1.18	0.1		0.99	0.3	4	46.7	5.1	0.47	23.8	0.05	1.2	0.029	3.18	0.5	32.3	0.02	719	0.4	2.99	30.1	1.4	1150	17.2	640			0.07
SRE	69904	Dorchap Peg	EL006277	547203	5922891	1162		3	PEG		PEG		Sub-cropping PEG, possibly continuation along strike from sample 69902/69903. Silica rich 'sugary' textured part of PEG	CHIP	PEG	AD19179452	0.03	7.09	30.2	10	6.2	0.86	0.18		1.29	0.5	3	32.3	7.9	0.62	20.7	0.07	1.8	0.026	2.49	0.6	19.4	0.02	922	0.53	3.33	24.3	3.6	1880	8.5	520			0.09
SRE	69905	Dorchap Peg	EL006277	547205	5922890	1161		2.5	PEG	PEG			2nd sample along chip line sample 69904, PEG here is more K-spar rich, 5-10mm crystals, random tourmaline	CHIP	PEG	AD19179452	0.03	7.48	53	10	8.34	1.97	0.14		1.23	0.3	3	33.3	7.4	0.67	23.1	0.07	1.3	0.047	2.6	0.6	25.7	0.03	408	0.48	2.99	20.9	2.2	1480	12.7	500			0.14
SRE	69906	Dorchap Peg	EL006277	547142	5922828	1161		5.5	PEG	PEG			aplitic(fine crystal 1mm) PEG, V.F tourmaline needles, Qtz rich groundmass, muscovite flakes, patchy MnOx films on fractures, outcrop represented by a 'blob' at edge of hillside, around 20m x 6m area.	CHIP	PEG	AD19179452	0.02	7.29	95.8	10	15.25	0.96	0.16	0.06	0.92	0.2	4	45	6.8	0.51	18.55	0.06	1.2	0.041	3.33	0.5	20.2	0.01	289	0.34	3.11	29.8	1.1	1720	11.7	640			0.1
SRE	69907	Dorchap Peg	EL006277	547019	5922826	1116		3.5	GRN_PEG	GRN_PEG			Granitic looking PEG, plagioclase-qtz evenly crystallised groundmass, 2mm crystals, Poorly developed tourmaline blades. Edge of PEG outcrop in GPX file.	CHIP	GRN	AD19179452	0.09	7.08	86.6	20	3.31	1.44	0.11		1.38	0.3	3	30.8	11.4	0.61	17.4	0.06	0.9	0.04	3.3	0.7	14.4	0.03	362	0.55	2.93	14.6	2	1160	17.3	449			0.19
SRE	69908	Dorchap Peg	EL006277	547005	5922831	1109		7	GRN_PEG	GRN_PEG			Bouldery end of outcrop, western end of 69907 outcrop. Dyke may plunge under soil cover towards the ESE. Plagioclase rich, minor K-Spar, Partly granitic textures, Minor patchy fine tourmaline needles.	CHIP	GRN	AD19179452	0.03	6.65	91.2	10	2.38	0.89	0.15		1.52	0.3	3	25.2	5.1	0.56	15.6	0.06	0.8	0.035	2.91	0.8	11.3	0.02	435	0.54	3.04	10.2	1.8	1170	13	374			0.17
SRE	69909	Dorchap Peg	EL006277	547256	5923043	1155		4.5	GRN_PEG	GRN_PEG			outcrop strikes approx 240 (mag azi), Granitic texture, minor zone tourmaline needles, equigranular 2mm plagioclase/muscovite/qtz.	CHIP	GRN	AD19179452	0.05	7.23	46.6	10	4.25	0.51	0.09		1.47	0.3	6	38.2	7.2	0.71	22.7	0.06	1.5	0.049	2.51	0.7	43.3	0.02	511	0.57	3.26	30.9	2.9	1270	9.5	490			0.22
SRE	69910	Dorchap Peg	EL006277	547255	5923039	1160		5	GRN_PEG	GRN_PEG			2nd sample along chip line to sample 69909. SE end of outcrop-coarser plagioclase and possible petalite samples?	CHIP	PEG	AD19179452	0.03	7.07	17.6	10	3.81	1.4	0.19		3.05	0.3	4	30.9	6.6	0.67	23.6	0.05	1.1	0.039	2.45	1.5	47.4	0.03	376	0.68	3.16	43.6	2.5	1280	15.5	440			0.16
SRE	69911	Dorchap Peg	EL006277	547268	5923043	1159		5	PEG	PEG			Sampling across coarser PEG zone of outcrop. 10-30mm plagioclase crystals, Lith at edges of outcrop consist of K-Spar, tourmaline and more granitic texture	CHIP	PEG	AD19179452	0.07	7.16	657	20	5.69	7.66	0.18	0.03	1.24	0.3	4	51.4	9.7	0.66	24.5	0.06	1.3	0.057	2.61	0.6	67.1	0.02	499	0.61	3.11	53.7	2.6	1550	10.1	620		0.01	0.71
SRE	69912	Dorchap Peg	EL006277	547244	5923034	1154			PEG	PEG			Grab from specific coarser grained 'petalite looking' part of outcrop over 5m area, NW end of outcrop. Coarse plagioclase, tourmaline, K-Spar	GRAB	PEG	AD19179452	0.05	6.49	46.1	10	2.52	0.93	0.08		1.31	0.4	5	38.3	6.3	0.55	18.95	0.06	0.5	0.043	3.46	0.7	44.8	0.02	241	0.47	2.33	19	1.8	1010	11.9	600			0.19
SRE	69913	Dorchap Peg	EL006277	547486	5923291	1113		3.5	PEG	PEG			Very small outcrop of PEG on west side of ridge.	CHIP	PEG	AD19179452	0.02	6.71	6.3	20	2.37	4.6	0.12		1.85	0.3	4	20.8	6.3	0.6	19.45	0.06	0.7	0.035	2.6	0.9	17.5	0.02	633	0.68	2.99	22.6	3	860	13.1	449			0.14
SRE	69914	Dorchap Peg	EL006277	546360	5920071	1396		5	GRN_PEG	GRN_PEG			PEG phase of granite? 60% plagioclase-20mm crystals, 30% qtz, muscovite flakes, petalite textures? (see photo)	GRAB	PEG	AD19179452	0.04	7.25	3.2	90	0.86	1.04	0.06		1.89	0.4	4	16.95	5.7	0.48	20.2	0.07	0.4	0.052	5.33	0.9	11.4	0.03	170	0.62	1.49	14.4	2.5	1230	18	440			0.17
SRE	69915	Dorchap Peg	EL006277	546715	5920061	1319		7.5	PEG	PEG			2 distinct types of crystallisation. 1-Granitic similar to site H622, 2-20-50mm plagioclase, Qtz, Tourmaline, muscovite. Outline of outcrop edge in GPX file. Seds noted on slope above outcrop	CHIP	PEG	AD19179452	0.05	6.33	13.6	10	1.14	0.89	0.21	0.02	2.68	0.4	4	9.09	5.8	0.51	19.35	0.06	1	0.103	1.82	1.3	15.5	0.03	243	0.46	2.98	13.4	1.5	790	15.3	204			0.09
SRE	69916	Dorchap Peg	EL006277	546717	5920055	1319			PEG	PEG			Grab of coarser grained 2nd type of PEG crystallisation related to sample 69915	GRAB	PEG	AD19179452	0.09	6.98	148.5	40	0.48	0.93	0.06		0.75	0.3	3	12.8	8.8	0.39	11.9	0.05	0.5	0.026	5.95		7.3	0.01	85	0.6	1.71	4.2	1.8	1140	45.5	421			0.12
SRE	69917	Dorchap Peg	EL006277	546834	5920058	1360			PEG		PEG		Sub-outcropping PEG, 120m uphill from H620 site. Qtz dominant PEG, possibly 'core' of PEG, tabular/sheeted textures. Grab sample. Outline of outcrop in GPX file.	GRAB	PEG	AD19179452	0.02	0.1	2		0.1	8.66			0.33	0.6	5	0.26	4.7	0.49	0.34			0.005	0.04		3.9	0.01	102	0.85	0.01	0.2	2.8	30	0.5	3.6			0.16
SRE	69918	Dorchap Peg	EL006277	547703	5923585	1146			PEG	PEG			Sth end of outcrop. PEG edge with adjacent granite. Border of outcrop-20mm plagioclase crystals, qtz, silvery muscovite flakes undergoing green sericite alteration. Core of outcrop- Granitic-equi-granular plagioclase, minor K-Spar, patchy VF tourmaline, mica, disseminated red garnet 0.2mm crystals	CHIP	PEG	AD19179452	0.05	6.76	32.4	10	2.92	1.02	0.1		1.65	0.3	6	27.2	6.6	0.71	21.4	0.05	1	0.028	2.05	0.8	34.1	0.01	1120	0.62	3.58	31.9	1.8	900	7.4	470			0.13
SRE	69919	Dorchap Peg	EL006277	547702	5923592	1144		3.8	PEG	PEG			NW end of outcrop. PEG edge with adjacent granite. Border of outcrop-20mm plagioclase crystals, qtz, silvery muscovite flakes undergoing green sericite alteration. Core of outcrop- Granitic-equi-granular plagioclase, minor K-Spar, patchy VF tourmaline, mica, disseminated red garnet 0.2mm crystals	CHIP	PEG	AD19179452	0.02	6.87	25.5	10	2.65	1.03	0.09		1.63	0.2	3	39.3	4.7	0.64	22.8	0.05	1.5	0.017	3.16	0.7	35.5	0.01	1720	0.51	2.8	35.4	1.7	1060	9.5	730			0.11
SRE	69920	Dorchap Peg	EL006277	547680	5923561	1142		5	PEG	PEG			Small outcrops of PEG up to 5m x 5m diameter. Plagioclase, Qtz, minor tourmaline	GRAB	PEG	AD19179452	0.06	7.37	86.3	30	1.91	1.2	0.09		1.15	0.3	4	27	7.1	0.59	20.1	0.05	0.6	0.023	4.18	0.8	21.8	0.01	289	0.6	2.84	22.1	2.2	1210	12.6	730			0.16
SRE	69921	Dorchap Peg	EL006277	548126	5923806	1169			PEG	PEG			Small outcrop found enroute to H643 site. 20-30mm plagioclase crystals, 60%Plag/30%Qz, Mica and minor tourmaline.	GRAB	PEG	AD19179452		6.78	15.9	30	2.72	1.25	0.08		0.78	0.4	6	35.9	8.5	0.73	24.9	0.05	0.5	0.008	2.43	0.5	65.6	0.02	193	0.59	2.99	62.6	2.4	1250	9.3	700			0.14
SRE	69922	Dorchap Peg	EL006277	548208	5923860	1141		6	PEG	PEG			Plagioclase rich PEG, sparse tourmaline, similar to sample 69921. Small outcrop that 'points' out of north side of ridge.	CHIP	PEG	AD19179452	0.01	6.71	17.9	10	2.28	0.83	0.12		0.96	0.5	4	31.2	5.7	0.71	27.3		0.7	0.019	2.71	0.6	31.5	0.01	327	0.69	2.6	63.8	3.7	1360	7.7	810			0.15
SRE	69923	Dorchap Peg	EL006277	547939	5921616	1218			PEG			PEG	PEG float boulders up to 2m diameter adjacent track from bulldozed logging track along spur. Likely narrow PEG, outcrop not found. 20-30mm plagioclase crystals, rare pale disseminated 2-5mm poorly formed red garnets? Throughout groundmass. 30% qtz	GRAB	PEG	AD19179452		7.44	38.6	20	2.33	0.77	0.2		0.79	0.4	4	24.8	8.3	0.63	24.3		1.1	0.022	3.02		8.2	0.01	277	0.77	3.84	81.3	2.8	2670	9.3	760			0.19
SRE	69924	Dorchap Peg	EL006277	549365	5923636	953			PEG	PEG			20mm Qtz/Plag crystals, 5-10mm muscovite flakes (sericte altered), possible fleck of cassiterite?. No tourmaline noted. SW edge of outcrop.	GRAB	PEG	AD19179452		7.48	30.3	30	3.6	0.63	0.15		0.9	0.4	4	44.9	5.1	0.55	33.6	0.05	2.1		1.86		80.9	0.01	699	0.39	3.91	72.2	2.2	2010	6	900			0.07
SRE	69925	Dorchap Peg	EL006277	549339	5923665	941		4	PEG	PEG			North face of outcrop, chips across part of escarpment where PEG consists of coarse Qtz/Plagioclase crystallisation. Photo of escarpment. H633 and H634 are probably of the same huge outcrop. See GPX file for edge of outcrop points	CHIP	PEG	AD19179452		7.56	33.7	10	2.28	0.37	0.11		0.25	0.3	3	56.7	4.2	0.43	24.4		0.6		5.15		19.7		198	0.54	2.49	43.5	2	1830	10.1	1790			0.07
SRE	69926	Dorchap Peg	EL006277	549340	5923662	942			PEG	PEG			Hollow/eroded part of PEG on Nth escarpment showing greissen textures. Coarse-book leaved muscovite, minor (garnet?), possible spodumene? Or cleaved plagioclase (photo)	GRAB	PEG	AD19179452		7.51	55.6	20	3.33	0.29	0.35		0.71	0.3	3	59.6	4.8	0.64	29.8		0.5		4.23		41	0.01	439	0.45	2.32	50	1.8	3090	10.1	1640			0.1
SRE	69927	Dorchap Peg	EL006277	549384	5923631	970			PEG	PEG			Coarse muscovite flakes (20-30mm), sericite alteration, Rare red/FeOx laths (after tourmaline/garnet or cassiterite?), Weathering of outcrop shows plagioclase well	GRAB	PEG	AD19179452		7.25	23.4	10	3.11	0.43	0.14		0.94	0.4	7	43.7	5.7	0.78	34.3	0.05	1.4		2.3	0.5	66.9	0.01	305	0.57	2.82	74.7	2.3	1550	5.5	1070			0.08
SRE	69928	Dorchap Peg	EL006277	549394	5923636	984			PEG	PEG			Boulder field/outcrop. 10-20mm Qtz/Plagioclase crystal phases, muscovite with sericite alteration	GRAB	PEG	AD19179452		7.46	26.2	10	3.27	0.68	0.06		0.42	0.4	3	53.1	4.6	0.69	39		0.7		2.54		112.5		1080	0.5	2.56	63.7	1.8	1690	4.6	1290			0.08
SRE	69929	Dorchap Peg	EL006277	549408	5923637	984			PEG	PEG			Boulder field/outcrop. Nth side of outcrop. Here, granitic phases with patchy PEG are more common. Fractionation? K-spar granitic, no tourmaline noted. Random patches of charcoal black (manganese oxides?) as films.	GRAB	PEG	AD19179452		7.75	104.5	10	3.52	0.34	0.15		1	0.5	4	40.4	5.9	0.77	34.4		0.8		2.02	0.5	37.5	0.01	432	0.68	3.48	79.1	2.7	1800	5	940			0.15
SRE	69930	Dorchap Peg	EL006277	549387	5923615	980			PEG	PEG			Outlying 'arm' of sth edge of outcrop. Fractionated? Phases of coarse Plagioclase, potentially Petalite (photo)	GRAB	PEG	AD19179452		7.8	47	20	2.84	1.81	0.16		1.26	0.6	7	56.4	6.6	0.89	34.8	0.05	0.6		3.99	0.8	113	0.01	386	0.72	2.35	59.1	2.7	1590	9.6	1500			0.1
ERE	69953	Qtz reef	EL006277	546245	5930225	1139		1	QTZ	QTZ			2x 1m diameter Qtz boulders on inside of bend of Razorback Track, Bucky looking quartz, no sulphides, Quartz does not intrude into road	GRAB	QTZ	AD19179452	0.01	0.04	1.3						0.31	0.3	4	0.09	6.1	0.34	0.13				0.01		3.3		64	0.58	0.01		2	10		0.7			0.16
ERE	69954	Qtz reef	EL006277	546246	5930226	1139		1	QTZ	QTZ			2x 1m diameter Qtz boulders on inside of bend of Razorback Track, Bucky looking quartz, no sulphides, Quartz does not intrude into road	GRAB	QTZ	AD19179452	0.01	0.04	1.6						1.16	1	9	0.1	7.6	0.74	0.19				0.01		3.3		90	1.15	0.01	0.1	3.9	10	0.5	1			0.32
ERE	69955	Glen Wills Peg	EL006277	545325	5921207	951		5	PEG_GRN	PEG_GRN			Granitic looking PEG, Plag/Qtz, Random flakes of biotite	CHIP	GRN_PEG	AD19179452	0.07	7.1	2.6	70	0.54	3.24	0.31	0.04	4.36	0.8	4	4.61	7	0.73	15.6	0.05	0.7	0.032	3.23	2.2	8.9	0.06	121	0.81	2.65	9.4	2.8	710	28.7	190			0.14
ERE	69956	Glen Wills Peg	EL006277	545320	5921186	945		4	PEG_GRN	PEG_GRN			Granitic looking PEG, Plag/Qtz, Coarse tourmaline on this side of outcrop	CHIP	GRN_PEG	AD19179452	0.08	7.05	1.2	20	0.36	2.94	0.27	0.03	10.25	1.2	6	4.55	7.4	0.85	15.3	0.06	0.6	0.022	3.35	5.9	6.4	0.05	167	1.22	2.71	5.8	4.2	850	20.5	200			0.27
ERE	70440	Anglers Rest Granite	EL006277	549524	5914676	989			GRN								0.01	6.62	2.4	550	2.56	0.08	0.53		44.3	1.2	2	3.19	31.9	1.26	15.5	0.21	4.4	0.026	3.38	26	9.4	0.08	147	4.06	2.76	12.8	1.2	130	14.2	196			0.08
ERE	70441	Anglers Rest Granite	EL006277	548765	5915429	1123			GRN								0.01	6.34	3.7	360	3.14	0.2	0.38	0.02	22.2	1.3	2	10.3	2.2	1.19	15.65	0.2	3.9	0.02	3.69	15.4	9	0.09	162	1.53	2.66	10.5	1.6	60	16.6	287			0.25
ERE	70443	Mt Wills Granite	EL006277	541714	5927869	1456			GRN								0.08	7.24	5.2	20	2.89	1.05	0.05	0.05	4.16	0.8	3	18.55	3.5	0.7	24	0.16	1.4	0.023	2.29	2.1	31.7	0.02	538	0.14	3.04	35.9	3.5	1670	10.7	518		0.01	0.2
SRE	70446	Boorgunyah Granite		518808	5951819	483			GRN								0.03	7.56	20.9	180	2.04	1.82	0.13		16.95	0.8	5	20.5	1.3	0.88	18.3	0.17	1.5	0.096	4.25	8.3	36	0.1	190	0.09	1.7	12.4	1.7	800	41.4	353			0.23
SRE	70447	Boorgunyah Granite		518811	5951040	504			GRN									7.7	7.3	140	1.48	2.77	0.07		19.55	1.5	8	17.15	3	0.82	18.05	0.15	1.7	0.105	3.81	11.2	65.5	0.12	116	0.24	0.38	12.6	2.7	260	34.5	307	0.002		0.67
SRE	70455	Dorchap Peg		521438	5950354	1095			PEG	PEG								7.39	88.9	290	9.15	1.02	0.35	0.29	1.18	0.4	1	53	0.7	0.6	30	0.1	1.4	0.026	1.8	0.6	73.2	0.01	858	0.08	3.6	95.4	0.6	4510	8.8	684			0.24
SRE	70305	Tallandoon Peg	EL006300	517872	5969966	376		1.5	PEG	PEG			1.5m chip pegmatite. Qtz, albite muscovite. Qtz veins cm wide forming 10% of the rock. Iron oxides abundant. Crystal size 0.5-1.5 cm. Fine needles of tourmaline.			AD20090716	0.09	7.13	251	40	1.57	1.77	0.06	0.05	4.28	0.9	11	13.4	8.4	0.99	17.95	0.06	1.1	0.03	3.69	2.8	11.3	0.04	491	1.27	2.36	12.7	5.5	1060	30.8	502			1.01
SRE	70315	Tallandoon Peg	EL006300	518289	5969888	426			PEG	PEG			Pegmatite/qtz float block. Minor stibnite. FeOx. Qtz with muscovite. 0.5m diamter block			AD20090716	0.13	3.28	55.7	20	0.82	6.27	0.03	0.09	1.03	0.4	5	3.5	12.8	0.99	7.37		0.3	0.01	0.85	0.8	10.6	0.01	139	0.34	1.71	9	1.3	530	25.1	115		0.01	9.86
SRE	70317	Tallandoon Peg	EL006300	518437	5969971	505			PEG	PEG			Pegmatite subcrop. 2x8m. Garnet, possible petalite. Quartz muscovite. Crystals to 10-25cm diameter. Dominantly 10-20mm. Garnet to 3mm diameter.			AD20090716	0.1	7.91	56.4	60	2.67	0.49	0.05	0.2	2.24	0.5	7	32.1	5.8	0.78	19.2	0.05	0.9	0.02	3.64	1.1	13.2	0.03	2390	0.72	2.95	28.7	3.1	1200	61	696		0.01	6.74
SRE	70060	Yabba Granite	EL006300	512810	5979743	646		1.6	GRN	GRN			1.6m chip sample across Moun tain View stope. Weathered granitic gneiss. 10cm pug zone with strong iron staining. Fault 121/SW/85. Possible dextral movement.			AD19242029	0.03	7.47	163	420	2.6	0.84	0.3	0.03	65.9	7.3	42	10.45	17.4	3.48	21	0.14	1.5	0.07	3.08	32.6	31.8	0.41	214	0.69	0.85	13.3	15.2	770	30.9	196			1.17
SRE	69985	Yabba Granite	EL006300	514322	5974854	684			GRN				Granite sample from Right Bower workings.			AD19189608	0.06	7.34	67.6	180	0.68	2.12	0.14	0.04	15.1	1.4	6	6.63	4	0.79	14.95	0.05	0.9	0.03	4.3	7.3	11.8	0.1	148	0.3	1.26	6.8	3.2	430	75.8	198		0.01	0.45
SRE	69704	Omeo Metamorphics		514396	5974849	586		2	SCH	SCH			Sample from open stope in 15.2 workings. Chip sampled over 2m perpendicular to the strike of the stope. Silicified schist (50cm wide)quartz 30cm wide and 1.2m of schist.			AD19024693	0.21	6.04	548	300	2.86	7.45	0.01	0.05	83.2	4.9	44	9.55	9.6	2.36	17.5	0.08	2.4	0.08	2.61	42.4	34.6	0.43	153	0.19	0.09	11.4	11.2	240	803	171		0.01	1.76
OUT	69705	Omeo Metamorphics		512522	5978108	566			SCH	SCH			Silicified gneiss. Abundant feldspars, minor biotite. Stringers of quartz abundant. Minor pyrite. Quartz dominant. Grainsize 1-10mm. Occasional large biotite and feldspars.			AD19024693	0.04	7.65	106	610	1.05	0.51	0.25	0.03	59.3	1.4	25	3.26	7.3	0.99	17.35	0.06	1.6	0.04	3.02	30.6	14.2	0.21	69	0.28	1.7	9.2	5.7	550	41.1	156.5			1.43
OUT	69707	Omeo Metamorphics		512511	5978138	574			SCH	SCH			Silicified schist with abundnat quartz veins			AD19024693	0.08	8.18	82.1	670	2.18	0.82	0.57	0.06	107.5	13.5	76	10.75	40	4.15	22.8	0.11	2	0.07	3.67	53.2	54	1.21	605	0.27	1.2	16.7	32.1	700	36	244		0.09	3.08
OUT	69709	Yabba Granite		512510	5978160	550			GRN	GRN			Representative mullock sample from Grasshopper No 2 Adit mullock heap. Altered granite, unaltered granite, gneiss, silicified gneiss.			AD19024693	0.44	6.68	61.2	300	1.45	1.84	0.14	0.23	7.38	0.9	4	5.25	6.8	0.6	10.15		0.7	0.02	3.52	3.9	34.6	0.1	73	0.18	0.76	1	1.3	440	76.9	176			4.32
SRE	69716	Omeo Metamorphics		514265	5975048	650		5	SCH	SCH			O'Dells drive, southern drive wall, chip sampled over 5m in schist from 0-5m.			AD19024693	0.09	7.19	114.5	520	3.12	0.41	0.47	0.14	90	11.1	50	10	21.2	3.28	18.75	0.09	2.8	0.06	2.6	44.5	57.7	0.87	445	0.2	1.01	13	27.5	630	28.5	169.5		0.01	0.58
SRE	69717	Omeo Metamorphics		514265	5975044	650		5	SCH	SCH			O'Dells drive, southern drive wall, chip sampled over 5m in schist from 5-10m. Schist, with occasional fine (cm) strigers of quartz and/or granite			AD19024693	0.05	7.54	113	600	2.89	0.39	0.36	0.08	104.5	11.9	56	9.86	9.6	3.54	19.8	0.1	3.3	0.06	2.81	51.4	43.4	0.72	388	0.15	1.02	13.5	25.2	590	34	175		0.01	1.29
SRE	69720	Omeo Metamorphics		514263	5975051	655		5	SCH	SCH			O'Dells drive, northern drive wall, chip sampled over 5m in schist from 0-5m. Schist			AD19024693	0.05	8.29	95.2	680	3.19	0.42	0.24	0.06	87.9	12.7	63	12.6	20.3	3.76	22	0.12	2.6	0.07	3.48	43.2	73.5	1.08	339	0.18	0.79	14.6	29.2	640	28.4	215		0.03	0.75
SRE	69721	Yabba Granite		514264	5975052	653			GRN	GRN			O'Dells drive, fall at end of northern drive. Sample collected across fall including altered granite and schist.			AD19024693	0.07	7.85	28.3	570	2.28	0.57	0.2	0.05	39.2	5	26	9.97	9.6	1.98	16.9	0.06	1.5	0.05	3.67	19.7	16.6	0.45	263	0.2	1.27	9.4	12.7	810	47.1	221		0.07	2.59
SRE	69722	Tallandoon Peg		514206	5975069	650		12	GRN_PEG	GRN_PEG			O'Dells adit. Chip sampled over 12 m of weathered and altered granitic pegmatite			AD19024693	0.02	8.05	34.5	750	2.05	0.93	0.03	0.03	59.4	9.4	35	11.1	13.4	2.41	20.5	0.08	1.7	0.05	3.29	30.7	50.2	0.56	256	0.12	0.27	12.5	21.4	270	41.4	174.5			0.21
SRE	69723	Tallandoon Peg		514189	5975076	650		6	GRN_PEG	GRN_PEG			O'Dells adit. Chip sampled over 6 m of weathered and altered granitic pegmatite			AD19024693	0.03	7.38	8.2	780	1.87	1.2	0.04		50.1	4.7	22	5.23	10	1.82	17.25	0.08	1.3	0.04	3.86	29.3	31.5	0.39	155	0.15	0.38	9.4	10.7	420	64.6	168.5			0.16
SRE	69724	Tallandoon Peg		514177	5975106	675		4	GRN_PEG	GRN_PEG			Granitic pegmatite. Grainsize dominantly 2-20mm. Quartz, plagioclase, orthoclase, tourmaline, muscovite, biotite. Sampled over 4m.			AD19024693	0.05	7.72	6.7	360	2.39	1.37	0.21	0.04	9.79	1.4	6	3.45	5.9	0.75	15.9		0.9	0.02	4.05	5.2	13.4	0.09	100	0.18	1.28	4.4	3	570	49.9	157.5			0.08
SRE	69728	Tallandoon Peg		514328	5975094	736			PEG	PEG			Mullock - pegmatite dominantly 20-40mm diameter, quartz dominanted, feldspar, muscovite, biotite			AD19024693	0.04	7.97	35	250	4.69	1.9	0.03		23.5	2	16	21	7.6	1.04	21.2	0.07	0.9	0.04	3.5	13	17.6	0.15	136	0.22	0.78	12.1	5.5	460	43.7	217			0.58
SRE	69729	Tallandoon Peg		514513	5975076	724		3	PEG	PEG			Pegmatite from base of 5x3m stope. Deeply weathered, quartz rich			AD19024693	0.01	6.65	129.5	140	1.98	0.28		0.03	80.2	4.7	31	6.52	22.6	2.56	13.4	0.08	2.3	0.04	1.13	48.5	11.5	0.13	54	0.35	0.02	9.3	18.1	290	33.9	91.9			1.59
SRE	69735	Omeo Metamorphics		513772	5977782	809			SCH	SCH			Mullock - Try Again workings. Silicified gneiss. Abundant quartz veinlets. Dominantly quartz, common feldspar. Abundant to minor biotite. Grainsize 2-3mm diameter			AD19024693	0.04	7.83	120	420	3.23	0.56	0.08	0.03	80.2	18.4	43	10.6	31	2.71	22	0.09	1.8	0.07	2.9	40.9	29.3	0.33	493	0.37	0.32	16.4	27.6	430	29.1	219			3.76
SRE	69736	Omeo Metamorphics		513771	5977782	808			SCH	SCH			Mullock - Try Again workings. Silicified gneiss. Abundant quartz veinlets. Dominantly quartz, common feldspar. Abundant to minor biotite. Grainsize 2-3mm diameter			AD19024693	0.03	2.88	26.2	180	1.15	0.29	0.15		25.5	3.1	19	5.12	6.9	1.35	7.41		0.6	0.02	1.22	12.7	20.1	0.26	162	0.3	0.37	5	7.6	280	12.8	85.4			0.89
SRE	69738	Yabba Granite		512480	5977457	621			GRN	GRN			Mullock from Prospect 15. Altered granite. Dominant quartz, common to abundant orthoclase, common muscovite. Tourmaline common. Quartz veins up to 5cm wide. Grainsize dominantly 5-20mm. Some pegmatite present. Minor pyrite and limonite. Occasional epidote			AD19024693	0.1	7.33	148	220	1.19	1.55	0.17	0.03	6.24	0.7	4	6.02	3.2	0.54	11.95		0.7	0.01	4.43	3.4	7.3	0.09	75	0.19	1.4	1.9	1.1	790	35.7	213		0.02	0.4
OUT	69740	Yabba Granite		512514	5978247	600		5	ALT_GRN	ALT_GRN			Chip sample from crosscut in Grasshopper No.1 adit at far end of what is currently accessable. Dominantly weathered granite and unaltered biotite granite, with rare silicified material from fault planes.			AD19024693	0.07	7.53	59.2	430	2.66	1.2	0.25	0.05	79.8	11.3	44	13.15	18.3	3.24	19.45	0.1	1.7	0.05	2.98	40.9	43.4	0.75	391	0.62	0.86	14.2	19.5	290	26.8	232			0.74
OUT	69743	Yabba Granite		512521	5978251	580			GRN	GRN			Granite in far end wall of Grasshopper No 2 Adit. Chipped over 8m.			AD19027922	0.05	7.05	310	430	3.17	0.71	0.17	0.06	70.6	14	43	11.8	30.2	3.21	19.05	0.08	1.6	0.05	2.82	36.8	40.1	0.69	371	0.35	0.44	14.3	20.5	280	34.9	224			2.98
OUT	69744	Yabba Granite		512518	5978247	580			GRN	GRN			Granite in fall material in shaft at far end of Grasshopper No 2 adit.			AD19027922	0.04	7.4	27.1	480	3.16	0.74	0.45	0.04	79	10.1	49	13.1	5.5	3.42	20.4	0.09	1.7	0.05	3.35	40.1	59.5	0.99	522	0.25	1.03	14.4	24.5	840	28.2	242		0.01	0.97
OUT	69745	Yabba Granite		512512	5978241	580		3.5	GRN	GRN			Granite in furtherest, western crosscut in Grasshopper. Chipped over 3.5m			AD19027922	0.06	7.38	9	520	2.5	0.99	0.66	0.04	70.3	9.6	38	15.3	16.8	3.05	19.05	0.08	1.5	0.04	3.39	36	57.1	0.85	510	0.18	1.23	14	20.7	1130	33.2	233		0.01	0.09
ERE	69747	Glen Wills Peg		546362	5920357	1291		8	GRN PEG	GRN PEG			Granitic pegmatite 70m north of 353. Muscovite, quartz, feldspar. Grainsize 2-20mm, dominantly 5-15mm. Rare biotite. Moderately weathered. Chipped over 8m.			AD19027922	0.04	7.27	12.9	80	1.13	3.16	0.28	0.02	12.65	0.6	4	15.95	1.9	0.62	18.85		0.9	0.11	3.24	6.2	14.2	0.05	158	0.14	2.3	11.8	1.3	720	24.2	303			0.28
ERE	69748	Glen Wills Peg		547420	5917848	1330		10	GRN PEG	GRN PEG			Helitarget H411. Granitic pegmatite striking 240deg. Chipped over 10m. Grainsize 2-40mm, doinantly 5-10mm. Quartz, feldspar, muscovite, common schorl. Strongly weathered.			AD19027922	0.01	7.38	8.2	110	0.62	0.77	0.22	0.02	6.18	0.9	6	5.2	7.5	0.69	15.2		0.5	0.04	3.85	3.5	2.7	0.1	229	0.19	2.54	10.8	2	760	24.9	215			0.06
ERE	69749	Glen Wills Peg		547499	5921173	1295		6	PEG	PEG			Bluejacket dyke. Small drive on east side of road. Chipped over 6m. Quartz, feldspar, muscovite, possible a\mbligonite, rare cassiderite. Fresh sample.			AD19027922	0.04	8.68	8.8	70	2.81	0.41	0.05		3.42	4.2	3	191	2.9	0.49	23.3	0.05	0.4	0.02	5.07	2.1	68.4	0.09	89	0.19	1.73	26.2	1.4	1940	8.6	1200			0.43
ERE	69750	Glen Wills Peg		547399	5921260	1245		12	PEG	PEG			Downhill, base of Bluejactet dyke. Sampled over 12m. Quartz, feldspar, muscovite. Minor to common lepetilite. Possible ambligonite. Rare bluejacket tourmaline. Moderately to strongly weathered. Grainsize 5-400mm, dominantly 10-50mm.			AD19027922	0.04	6.08	20.6	10	7.2	0.25	0.34		2.06	0.5	5	316	1.3	0.68	26.6		1.9	0.01	1.52	1	700	0.03	492	0.21	2.52	137	1.2	2510	5.5	1080			0.74
ERE	69751	Omeo Metamorphics		547399	5921268	1245		0.2	SCH	SCH			Silicified fault gouge collected from far reaches of mine adit below bluejacket dyke on eastern drive. Quartz, pyrite			AD19027922	0.11	6.61	5	540	2	0.58	0.27	0.08	79.8	7.5	52	36.9	27.3	3.16	17.75	0.08	2.9	0.05	2.57	40.7	102	0.91	349	0.27	0.62	13.1	22.7	510	25.4	181		0.06	0.11
ERE	69752	Omeo Metamorphics		547399	5921266	1245		0.2	SCH	SCH			Fault gouge from beneath first shaft in adit below Bluejacket dyke. Quartz.			AD19027922	0.16	6.06	80	320	3.26	2.43	0.72	0.03	71.5	8.3	86	25	55.7	3.3	17.3	0.1	2	0.07	2.61	40.4	67.7	1.11	92	6.76	0.09	7.1	64.1	3680	8.3	250	0.022	0.65	0.31
ERE	69753	Glen Wills Peg		545594	5917283	1334		5	PEG	PEG			5m wide pegmatite. Grainsize 1-70mm diameter, dominantly 2-15mm. Quartz, fledspar, muscovite, common biotite. Strongly weathered. Chipped across 5m width.			AD19027922	0.05	7.12	19.5	170	0.32	1.33	0.28		3.81	1.2	5	10.25	3.6	0.7	14.7		0.5	0.02	4.87	2.3	9.3	0.08	115	0.2	1.54	6.7	2.6	730	51.9	237			0.09
SRE	69754	Tallandoon Peg		512480	5977708	580		10	PEG	PEG			Chipped over 10m from start of Wombat burrow to towards entrance. Weathered pegmatite, altered aplite with siricite/epidote. Abundant limonite. Biotite schist dominated shear zone. Rare to minor quartz.			AD19027922	0.08	9.49	101	580	3.58	1.66	0.11	0.03	94.4	9.2	71	7.39	9.1	2.14	25.5	0.12	1.9	0.08	3.44	47.1	41.4	0.51	196	0.19	1.93	13.3	20.5	450	26.7	209		0.03	0.84
SRE	69755	Dorchap Peg		531772	5944062	576		8	PEG	PEG			8m wide pegmatite dyke. Grainsize 2-60mm, dominantly 5-10mm. Abundant quartz veins, 1-2cm wide forming 5% of outcrop. Quartz, fledspar, muscovite. Sampled across 8m.			AD19027922	0.02	7.7	7.6	50	105	0.24	0.12		1.29	0.5	4	25.9	2.2	0.47	23.4		0.8		1.57	0.6	850	0.02	384	0.21	4.57	50.5	2.4	1400	14.5	500			0.07
SRE	69756	Dorchap Peg		531862	5944340	580		15	PEG	PEG			Helitarget PH5_7. 15x50m dyke. Quartz, feldspar, common to abundant muscovite. Grainisze 1-60mm, dominantly 5-20mm. Moderately weathered. Narrow intervals of aplite and sediment within dyke. Common quartz veins to 50cm wide forming 5% of outcrop. Sampled over 15m. Sediment strike dip = 320/SW/82			AD19027922	0.01	7.9	33.3	160	67.3	0.13	0.15		2.98	0.7	5	52.6	1.2	0.43	21.1		1.3		2.46	1.5	86.8	0.04	165	0.12	3.82	68.9	1.2	1350	23.3	600			0.07
SRE	69757	Dorchap Peg		532226	5944800	537		15	PEG	PEG			25m wide dyke, sampled on the south side over 15m. Quartz, feldspar, muscovite. Rare possible petalite. Moderately to strongly weathered. Grainsize 1-200mm diameter, dominantly 2-5mm. Helitarget PH5_6			AD19027922	0.02	8.16	4.3	60	106	0.22	0.32		1.26	0.3	3	42.1	1.3	0.47	24.4		1.1		2.71	0.8	167	0.01	151	0.14	2.83	119.5	1.6	2420	17.9	860			0.1
SRE	69758	Dorchap Peg		532232	5944815	537		10	PEG	PEG			25m wide dyke, sampled on the north side over 10m. Quartz, feldspar, muscovite. Rare possible petalite. Moderately to strongly weathered. Grainsize 1-180mm diameter, dominantly 5-20mm. Helitarget PH5_6			AD19027922	0.01	8.05	2.9	50	15.6	0.26	0.06		0.47	0.4	3	30	1.9	0.5	16.45		0.5		3.11		1910	0.01	157	0.24	2.52	39.9	1.8	1390	13.5	620			0.09
SRE	69759	Dorchap Peg		532250	5944767	543		5	PEG	PEG			5m wide pegmatite near river bend. Sampled over 5m. Quartz, feldspar, muscovite. Moderately weathered. Grainisze 1-20mm, dominantly 2-5mm.			AD19027922	0.02	7.71	6.9	50	90.2	0.26	0.24		0.54	0.4	4	35.6	1	0.48	27.4		0.3		2.43		184.5	0.01	124	0.16	2.65	68.1	1.1	1730	13.9	800			0.08
SRE	69760	Dorchap Peg		532340	5944736	585		5	PEG	PEG			5m wide pegmatite at helitarget PH5_5. 1m wide quartz vein 4m NE of dyke. Grainsize 1-20mm, dominantly 2-10mm. Quartz dominant, feldspar, muscovite. Moderately to strongly weathered. Sampled over 5m.			AD19027922	0.02	7.55	30.9	30	61.2	0.23	0.13		3.46	0.5	4	37.4	1.2	0.39	22.1		1.2	0.03	1.54	1.8	48.3	0.02	262	0.13	4.05	66.9	1.5	1190	12.5	620			0.07
SRE	69761	Dorchap Peg		532123	5944927	534		5	PEG	PEG			5m wide pegmatite in riverbank sampled over 5m. Grainsize 1-20mm, dominantly 2-5mm diameter. Quartz, feldspar, muscovite. Quartz veins upto 5cm thick forming % of the outcrop. Sediment strike dip 154/E/80			AD19027922	0.01	5.3	2	20	101.5	0.5	0.06		0.33	0.4	4	33	3	0.47	14.95		1.6		1.29		345	0.01	97	0.26	2.18	43.4	1.3	900	14.8	421			0.11
SRE	69762	Dorchap Peg		532069	5944953	545		6	PEG	PEG			Helitarget PH5_4. 20x 6m pegmatite dyke sampled over 6m. Quartz, feldspar, muscovite. Strongly weathered. Abundant quartz, minor muscovite, grainisze 1-70mm, dominantly 2-5mm. Possible petalite upto 60mm diameter.			AD19027922	0.05	6.47	1540	20	50.2	6.88	0.05	0.13	0.53	0.2	3	21.1	0.7	0.5	14.55		1.4	0.01	1.94		178	0.01	202	0.14	3.54	64.5	0.6	1250	15.5	530		0.04	0.23
SRE	69763	Dorchap Peg		531833	5944569	624		7	PEG	PEG			7m wide dyke. Grainsize 1-20mm, dominantly 2-5mm. Quartz, fledspar, minor muscovite. Strongly weathered.			AD19027922	0.01	7.66	3.7	10	15.8	0.68	0.06	0.35	0.94	0.2	4	27.3	0.7	0.59	22.7		0.8		2.33		88.7		780	0.17	3.68	72.8	0.8	1510	12.2	640			0.06
ERE	70330	Banimboola Quartz Monzodiorite		540418	5949608	498			GRN DIO	GRN DIO			Granodiorite. Silica rich with 3mm groundmass. Feldspar 20-30%, decomposed to clay. Abundant malachite and tyrolite. Common to abundant FeOx. 2-3mm thick quartz veins forming 10% of rock mass. Very fine disseminated sulphide.			AD20255517	1.83	8.06	19.2	310	1.58	9.83	0.2	0.19	83.9	16	74	19.15	12000	3.44	16.95	0.08	4.7	0.14	3.2	38.7	26.2	1.35	713	6.54	0.2	10.7	23.6	650	39.5	202		0.02	10.25
ERE	70332	Banimboola Quartz Monzodiorite		540424	5949606	499			GRN DIO	GRN DIO			Silicified granodiorite. 2-3mm granodiorite. Fine disseminated sphalerite and chalcocite. Fresh, unweathered.			AD20255517	0.1	7.12	17.1	810	1.6	1.18	2.33	0.06	61.2	11.7	53	12.8	191	3.14	15.35	0.12	4.3	0.05	3.56	31.8	12	1.18	486	0.8	1.68	8.8	21.1	550	9.9	191		0.03	2.21
ERE	70333	Banimboola Quartz Monzodiorite		540425	5949623	499			DIO	DIO			Diorite, Fresh. Unaltered. Unmineralised. 3mm groundmass. Biotite, quartz amd feldspar.			AD20255517	0.06	7.8	8.5	820	1.45	0.32	5.1	0.08	55.5	25.2	90	6.27	67.4	5.01	17.9	0.11	1.9	0.05	1.8	27.5	27.2	2.86	854	1.32	2.13	7.6	41.1	750	14.7	79.5			0.53
SRE	70337	Omeo Metamorphics		512799	5977193	676			SCH	SCH			Morning Star mullock. Biotite schist. Dominantly 80%+ biotite foliated schist. Gneissic texture. Pegmatite veins to 20mm thick, forming 0% of rock. Weakly weathered.			AD20255517	0.06	9.37	226	730	21	0.66	0.12	0.07	50.2	10.3	92	31.8	23.2	5.07	31.9	0.17	2.3	0.1	4.47	19.5	80.9	1.45	641	0.26	0.68	32.7	33.1	470	33.2	281		0.01	0.33
SRE	70341	Omeo Metamorphics		512799	5977191	679			SCH	SCH			Crenulated biotite schist			AD20255517	0.1	9.77	168	810	7.24	0.81	0.12	0.2	49.3	15.8	103	33.7	48.6	5.61	33.9	0.25	1.7	0.11	4.72	18.7	79.3	1.69	724	0.2	0.72	20.8	51.2	460	35.4	275		0.04	0.27
SRE	70342	Yabba Granite		512802	5977189	675			GRN	GRN			Morning Star mullock. Pink granite. 40x40cm block. Orthoclase 60%, qtz 20%, 15% tourmaline, Trace muscovite. Sericite alteration on fault planes with slickenlines. Tourmaline dominantly as fine mm needles - schorl. Groundmass 3mm diameter. Zones of foliation with elongates qtz and orthoclase crystals. Fresh, weak weathering. Unmineralised.			AD20255517	0.07	7.13	102	100	1.2	1.75	0.21	0.03	2.44	0.4	3	3.33	6.5	0.53	10.3	0.14	1.5	0.01	4.23	1.2	2.9	0.05	209	0.26	2.44	0.4	0.8	740	69.6	141			0.49
SRE	70343	Yabba Granite		512802	5977191	675			ALT GRN	ALT GRN			Morning Star Altered granite. 15x15cm block. 40% orthoclase, 20% qtz, 40% sericite altered muscovite. Groundmass 3-4mm diameter. Qtz veins up to 20mm thick fomring 5-10% of rock. Fine mm sulphides, likely galena cubes disseminated throughout. Rare sphalerite 2-5mm blobs and cubes. Weakly mineralised. Fresh with trace of possible weak weathering.			AD20255517	0.16	6.39	47.4	180	4.22	3	0.34	0.05	2.17	1.6	2	2.26	15.2	0.62	10.75	0.14	0.7	0.03	1.69	1.1	4	0.17	132	0.31	2.57	2.1	1.9	170	57.6	87.7		0.06	8.87
SRE	70344	Tallandoon Peg		512804	5977188	675			GRN	GRN			Fresh, unmineralised pegmatite. Crystals 3-60mm diameter, 70% orthoclase, 10% qtz, 5-10% tourmaline (schorl), % muscovite. 20x20cm block.			AD20255517	0.04	7.22	6.7	100	1.13	0.72	0.21		2.3	0.3	2	3.09	2.5	0.42	9.6	0.16	0.7	0.01	6.09	1.1	2.4	0.07	78	0.11	1.71	0.4	0.6	970	89.7	165		0.01	1.5
ERE	70360	Banimboola Quartz Monzodiorite		538761	5950350	347			DIO	DIO			Representative mullock sample. Occasional malachite and tyrolite. Silver sulphide mineral? In diorite.			AD20255520	0.99	7.44	207	480	1.2	4.25	1.85	0.22	50.4	28.8	167	10.6	881	5.32	16.25	0.13	1.3	0.16	1.91	24.8	28.7	1.92	860	1.24	1.61	6.8	67.8	680	69.9	106.5	0.002	0.17	6.57
ERE	70361	Banimboola Quartz Monzodiorite		538756	5950353	347			GRN DIO	GRN DIO			Granodiorite with fine disseminated sulphides. Possible chalcocite.			AD20255520	0.23	7.3	33.5	880	1.28	1.5	3.07	0.12	53.1	27.3	163	7.97	168	5.43	16.5	0.14	1.3	0.08	2.13	25.6	19	3.07	782	1.72	1.79	7.6	67	680	16.9	106	0.003	0.12	1.31
ERE	70364	Banimboola Quartz Monzodiorite		538861	5950367	396			GRN DIO	GRN DIO			East along strike from previous sample. Granodiorte outcrop. Chip sampled across 7m. Biotite and hornblende forming 40%, occasional orthoclase present. 4mm groundmass.			AD20255520	0.07	7.72	4.2	630	1.43	0.29	4.75	0.1	49.3	27.6	112	4.71	108.5	5.43	17.85	0.16	1	0.06	1.51	23.3	26.7	2.94	965	0.79	1.94	7.4	45.8	770	11.9	70.4		0.01	0.28
ERE	70365	Banimboola Quartz Monzodiorite		539031	5950292	413			GRN DIO	GRN DIO			8m subcrop of granodiorite. Biotite rich, 3-5mm groundmass			AD20255520	0.07	7.54	7.1	720	1.41	0.48	4.29	0.08	48.6	24.3	87	5.92	85.3	4.97	17.25	0.15	1.1	0.05	1.83	23.2	22.8	2.52	870	1.06	1.98	7.5	37	690	12.3	73.2		0.01	0.39
ERE	70366	Banimboola Quartz Monzodiorite		540774	5949839	560			GRN DIO	GRN DIO			Hodders Adit. Mullock Grab. Chlorite altered granodiorite. 1mm vein of chalcocite and sphalerite. Orthoclase and biotite granodiorite. 3-4mm Groundmass.			AD20255520	0.36	8.04	13.7	540	1.39	6.87	3	0.31	57.3	21.3	99	14.7	863	4.34	17.8	0.15	2	0.09	1.9	27.4	27.5	2.11	601	1.81	2.26	7.6	35.5	720	22.2	97.3		0.07	2.92
ERE	70370	Banimboola Quartz Monzodiorite		540773	5949849	560			GRN DIO	GRN DIO			Hodderrs Adit Mullock. Unaltered, unmineralised granodiorite.			AD20255520	0.05	7.6	8.6	820	1.45	0.24	4.7	0.12	55.6	24.5	95	6.81	49.7	4.87	17.05	0.14	1.7	0.05	2	26.9	13.8	2.82	829	1.84	2.09	7.1	40.6	720	14.3	75.7		0.01	0.75
ERE	70383	Banimboola Quartz Monzodiorite		539095	5950748	430			GRN DIO	GRN DIO			Empress of India workings. Mullock. Granodiorite block. Appears unmineralised and fresh. Slickenlines and possible epidote alteration on one surface.			AD20255520	0.18	7.49	10.5	360	1.48	1.01	2.7	0.1	48.6	23.5	99	6.29	192.5	5.04	16.95	0.15	1.1	0.08	1.39	22.7	21.9	2.36	741	1.82	1.86	7.4	41.6	680	11.8	73.7		0.11	2.93
ERE	70384	Banimboola Quartz Monzodiorite		540565	5950425	553			GRN DIO	GRN DIO			Strogly silicified granodiorite float block. 10-20mm thick quartz veins common. Possible fine disseminated chalcocite.			AD20255520	0.39	5.29	2.8	1060	0.6	2.23	0.99	0.02	54.2	5.8	25	3.45	317	1.78	9.52	0.18	2.8	0.04	4.9	44.4	1.6	0.54	340	4.71	0.81	5.9	8.3	290	6.9	163.5	0.002	0.01	0.79
ERE	70386	Banimboola Quartz Monzodiorite		540554	5950589	556			DAC	DAC			1m chip across unaltered dacite near small work in 70385. Slight porphyritic texture. Large slightly weatheredd feldspars within a fine groundmass. Plae blue grey. Groundmass 1-3mm. Fresh, weakly weathered, unmineralised.			AD20255520	0.11	7.02	1.3	1020	1.42	0.22	1.56	0.08	51.7	10	31	2.72	265	2.29	13.9	0.15	3.1	0.04	4.2	31.8	6	0.82	313	0.25	1.85	7	13.6	330	6.5	144			0.25
ERE	70387	Basalt		541307	5950042	679			BAS	BAS			Subcrop of limburgite/basalt dyke near top of hill at Granite Flat. Rare 4-5mm diamter crystals of olivine or epidote set within a very fine grained mafic matrix			AD20255520	0.04	6.65	1.8	810	2.29	0.07	6.78	0.13	143	46.5	255	2.93	59.6	8.47	20.3	0.29	8.4	0.08	1.71	69.5	13.9	5.22	1320	3.33	2.29	109.5	226	5010	6	54.2		0.04	0.21
SRE	70390	Omeo Metamorphics		512799	5977189	665			SCH	SCH			Foliated biotite schist from Morning Star Mullock. Abundant biotite. Thin pehamtite vein 1-20mm thick intruded along bedding planes.			AD20255520	0.02	8.07	6.6	570	3.02	0.99	0.16	0.03	98.9	14.6	83	12.5	25.7	4.71	23.7	0.24	2.5	0.09	3.04	44.9	62.5	1.41	495	0.3	0.3	19.3	32.7	510	23.2	220			0.12
MIRE	68923	Dorchap Peg	EL5315	523924	5949230	1116	EAGLE DYKE	10	PEG	PEG			Coarse F/Spar/Qtz/SPOG? As PEG (No Tourmaline) - pockets / zones of strong Mn staininig - poss associat with with strong areas of spodumene?	CHIP	PEG	AD21125751				45.1					4.5		10	47.8			17.5		0.9			2.7						39.8				906
MIRE	68936	Dorchap Peg	EL5315	527434	5953366	640	BHP28		PEG	PEG			PEGMATITE OUTCROP APPROX. 1.8m WIDE. THIS OUTCROP IS PROBABLY DYKE SEEN IN LEFT WALL OF ADIT BELOW. MICA, FELDSPAR (KAOLIN), OXIDISED CASSITERITE? (BLEBS), NO OUTCROP VISIBLE IN ROAD ABOVE SITE, ALONG STRIKE.	CHIP	PEG	AD21125751				28.1					1.9		0	93.4			26.3		3.4			4.5						115.5				875
MIRE	68938	Dorchap Peg	EL5315	526237	5954441	829	BLAIRS DYKES		PEG_SN			PEG_SN	BOULDERS OF GREISENISED PEGMATITE, POSSIBLY THROWN OUT FROM OLD SHAFT SUNK UP HILL FROM THIS SITE. MUSCOVITE RICH MATRIX, COARSE CASSITERITE BLEBS AND WITHIN LAYERS THAT HAVE GREISEN. ONE SPECIMEN HAD TWINNED RUTILE NEEDLES ON META-SCHIST BEDDING PLANE.	GRAB	PEG	AD21125751				31.3					0.7		0	91.2			42.1		9.6			0.6						762				1355
MIRE	68943	Dorchap Peg	EL5315	523716	5953071	700	GOSPORT		PEG	PEG			LARGE SILICA RICH PEGMATITE. MASS OF STRINGERS INTRUDED INTO PSAMMITE. MINOR GREISEN. PEGMATITE NOT TOO COARSE. FELDSPARS 0mm IN SIZE. POSSIBLE SN02. OUTCROP APPROX. 4m THICK HERE. SAME PEG AS SITE 608503.	CHIP	PEG	AD21125751				39.4					3.6		10	61.9			20.6		1.4			1.9						82				693
MIRE	68948	Dorchap Peg	EL5315	525563	5959619	852	SPRINGTIME LEASES		PEG	PEG			SMALL NARROW TRENCH/CUT ABOUT 15m LONG WITH A POSSIBLE COLLAPSED UNDERLIE SHAFT AT THE SOUTHERN END. WORKINGS AVERAGE 1.5-2m WIDE, MINING OUT PEG/GREISEN ZONE TO AROUND 3m IN DEPTH. MULLOCK SHOWS GREISEN, FELDSPAR, SERICITE (GREENISH), RARE SNO2 IN VUGS	CHIP	PEG	AD21125751				31.6					3.7		10	45.3			26.7		1.4			2.6						65.7				878
MIRE	68949	Dorchap Peg	EL5315	525570	5959587	851	SPRINGTIME LEASES		PEG			PEG	SITE OF DEEP SHAFT APPROX. 20m DEEP, SUNK ON SOUTHERLY STRIKE CONTINUATION OF PEGMATITE FROM SITE 608518. MULLOCK CONTAINS GREISEN PEG, COARSE GRAINED FELDSPAR, SERICITE/MUSCOVITE, COARSE SNO2 DISSEMINATED IN GREISEN.	GRAB	PEG	AD21125751				54.7					10.6		10	107			39.4		1.5			16.7						129				1780
MIRE	68951	Dorchap Peg	EL5315	526147	5954165	819	BLAIRS DYKES		PEG	PEG			DEEPER COSTEAN SUNK INTO PEG. OUTCROP ABOUT 2m THICK. SAMPLE TAKEN ACROSS EXPOSURE. PARTLY WEATHERED SCHISTS ON DYKE CONTACT. DYKE SEEMS TO PINCH OUT IN A S.E STRIKE FROM THIS SITE.	CHIP	PEG	AD21125751				16.2					0.7		0	27.5			19.4		1.2			0.4						58.9				516
MIRE	69010	Dorchap Peg	EL5315	523830	5952598	703	GOSPORT		PEG						PEG	AD21125751				13.8					0.6		10	28.5			13.3		0.4			0.4						42.5				684
MIRE	69036	Dorchap Peg	EL5315	524062	5949148	1163	EAGLE DYKE	5	PEG.	PEG.					PEG	AD21125751				19.2					0.6		0	36.1			17.4		1.1			0.3						58.1				517
MCRE	69050	Dorchap Peg	EL006486	523295	5948570	1164	EAGLE WEST	6	PEG.	PEG.			PEG-Fine-Med grain, GPS=west Contact see sample description *tace ASP.? (P.gey sulphide ) on w-wall contact	CHIP	PEG	AD21125751				60.9					1.8		10	48.1			28		1.3			0.9						52.3				783
MIRE	69078	Omeo Metamorphics	EL5315	521444	5956683	519	SD1	11	SED	SED			Highly micaceous dark schistose siltstone wedge b/ween two dyke bars. No veining.	CHIP	SED	AD21125751				523					85.5		70	61.9			20.6		6			42.2						15.7				238
MIRE	69100	Dorchap Peg	EL5315	527130	5955084	784	SD8	3.2	PEG	PEG			SANDSTONE RICH PART OF PEGMATITE. 30% PLAGIOCLASE GROUNDMASS WITHIN OXIDISED SANDSTONE HOST ROCK. OUTCROP 3.2m WIDE HERE. BOULDERY OUTCROP	CHIP	PEG	AD21125751				41.9					3.8		10	37.3			23.2		2.8			2.2						93.1				460
MIRE	69102	Dorchap Peg	EL5315	527252	5955072	752	SD7	5	PEG	PEG			LARGE WIDE PEGMATITE 'BLOB' STICKING OUT OF RIDGE. PEG INTERPRETED TO PINCH AND SWELL ALONG STRIKE. MED CRYSTALLINE PLAGIOCLASE GROUNDMASS (70%), MED-COARSE MUSCOVITE DISSEMINATED FLAKES, <30% QTZ, Mn STAINING ON FRACTURES	CHIP	PEG	AD21125751				45					0.8		10	113.5			23		0.7			0.4						38.5				1905
MIRE	69133	Dorchap Peg	EL5315	524611	5950421	994	FERGUSSONS	5.6	PEG_SN	PEG_SN			SnO2 seen in numerous chips as fine aggregates. Brownish tin bandings or Mn stainings. Feldspar partly Kaolinised, Sericitic alteration. Greissen. Handspecimen possibly shows tabular-striated crystals of Spodumene	CHIP	PEG	AD21125751				18.9					1.4		0	33.6			19.9		1.1			0.9						65.9				613
MIRE	69162	Dorchap Peg	EL5315	523404	5954446	583	GOSPORT	7	PEG_SN	PEG_SN			Boulder outcrop-subcrop running sub-parallel to small gully. True outcrop at site 6-8m wide. Blackberries made sampling nearly impossible. SnO2 visible, heavy samples. Partially greissenised PEG, Fine-Med crystallised kaolinsed Plagioclase, patchy FEOX,	GRAB	PEG	AD21125751				15.6					1.1		10	46.2			21.6		0.9			0.7						96.1				832
MIRE	69191	Dorchap Peg	EL5315	515366	5949496	1080	ESKDALE SPUR	2.2	PEG_SN	PEG_SN			Patcy FEOX-Manganese, Coarse >10mm muscovite flakes, Plag rich groundmass (Partly kaolinised), Rare cassiterite, Patch of greissen?	CHIP	PEG	AD21125751				19					1.3		10	110			33.1		1.7			0.6						85.8				855
MIRE	69201	Dorchap Peg	EL5315	515326	5949556	1079	ESKDALE SPUR		PEG	PEG			Boulder field of PEG below intruded adjacent GRN. 10mm muscovite flakes, 40% Qtz: Plag. Random coarse 5mm tourmaline crystals.	GRAB	PEG	AD21125751				21.3					2		10	88.6			29.4		2.5			0.9						56.4				780
MIRE	69241	Dorchap Peg	EL5315	524438	5957969	897		1.5	PEG	PEG			PEG strong foliation along 330G strike - elongate fspar in foln but most vis petalite (+100 x 10mm) is 90 to foln direction and not rotated. Petalite xtals alos in clusters, O/C shows less than 10% petlaite . Xtals loo to dip appr 70 S internally (irre	CHIP	PEG	AD21125751				12					0.5		10	26.5			18.9		0.9			0.3						76				630
MIRE	69245	Dorchap Peg	EL5315	524488	5957916	897		2.5	PEG	PEG			Coarse PEG, well foliated. 100% O/C	CHIP	PEG	AD21125751				15.1					0.5		0	47.3			22.6		1.9			0.3						102.5				744
MIRE	69332	Dorchap Peg	EL5315	523898	5952540	709	DORCHAP		PEG	PEG			>30mm petalite in minor aplite component	Grab		AD21125751				14.4					0.3		10	412			17		0.1			0.2						10.8				4240
MIRE	69335	Dorchap Peg	EL5315	524713	5959197	861	DORCHAP	10	PEG	PEG			3x1.2m outcrop. Dominantly quartz. Minor muscovite. Feldspars appear weathered. Some pink coloured feldspar - either oxidation/weathering or K-feldspar? Homogenous, fine grained ~2 mm diameter. Dominantly white coloured with flecks of yellow from weather	Grab		AD21125751				20.9					0.7		10	91.5			26.3		2			0.5						76.8				1115
SRE	69373	Dorchap Peg	EL006300	522604	5960612	484	DORCHAP	7	PEG	PEG			7x12m dyke striking 318deg. Smaller 0.5-1m dykes running adjacent. Crystals typically 3-10 mm. Moderately weathered. Muscovite, quartz, feldspar.	Grab		AD21125751				44.1					3.3		10	18.1			24.6		1.3			1.7						42.1				389
SRE	69393	Dorchap Peg	EL006300	522138	5969024	372	DORCHAP	4	PEG	PEG			7x4 m granite outcrop located directly beneath an additional granite outcrop 30 m south (456). Inferred to be the same deposit, with central part of granite subcropping. Quartz (5 mm), feldspar (20 mm), pyroxene/tourmaline (2.5 mm long laths). Sharp non-	Chip		AD21125751				578					75.5		10	3.16			17.7		4.7			37.5						17.2				157
SRE	69394	Dorchap Peg	EL006300	521490	5969488	335	DORCHAP	2	PEG	PEG			1x2 m pegmatite boulders distributed over 40 m^2 area. Samples collected from five lithologically similar outcrops in this area. Intergranular coarse grained pegmatites. Predominantly quartz + feldspar, minor tourmaline laths (5 mm).	Chip		AD21125751				94.2					3.2		10	94.7			27.9		5.1			1.9						111.5				956
SRE	69395	Dorchap Peg	EL006300	521517	5969455	327	DORCHAP	1	PEG	PEG			1x1 m muscovite rich pegmatite boulders. Boulders dominated by coarse muscovite books (30 mm), in a fine siliceous matrix.	Chip		AD21125751				362					1.4		0	844			73.7		2.8			0.9						73.9				6690
MCRE	69468	Dorchap Peg	EL006486	534249	5943476	977	DORCHAP	5	PEG		PEG		10x5 m subcrop. Large petalite crystals to 250mm, quartz, feldspar and muscovite typiclly 5-20mm. Rare cassidurite elbows. Moderately weathered	Chip		AD21125751				14.5					0.9		10	65.1			21		2.4			0.5						86.9				1245
MCRE	69469	Dorchap Peg	EL006486	534233	5943473	981	DORCHAP	4	PEG	PEG			8x4 m dyke. Large petalite crystals to 250mm, quartz, feldspar and muscovite typiclly 5-20mm. Moderately weathered	Chip		AD21125751				11.6					0.7		10	54			21.7		1.4			0.6						80.4				1230
MCRE	69470	Dorchap Peg	EL006486	534238	5943464	990	DORCHAP	10	PEG		PEG		subcrop sampled over a 10m area. Quartz to 80 mm, petalite to 250mm, muscovite to 20mm.	Chip		AD21125751				9.5					0.6		10	64.7			18.4		1.1			0.4						68.9				1240
SRE	69392	Dorchap Peg	EL006300	522155	5969033	382	DORCHAP	2	PEG	PEG			5x2 m granite outcrop located directly above an additional granite outcrop 30 m north (457). Inferred to be the same deposit, with central part of granite subcropping. Quartz (5 mm), feldspar (20 mm), tourmaline (2.5 mm long laths). Sharp non-conformable	Chip		AD21125751				619					65.8		10	3.42			17.2		4.7			34.2						17.5				175
ERE	69496	Glen Wills Peg	EL006277	548145	5918634	1425	DORCHAP	16	PEG	PEG			Helitarget 463. 16m wide sample transect across dyke. Large dyke, approx 80x12m. Grainsize ranges from 10-300mm, commonly 30-100mm. Abundant quartz and muscovite. Common tourmaline (schorl) and feldspar. Minor blue phosphate minerals. Possible obligonite	Chip		AD21125751				26.6					3.4		10	89			35.1		1.2			1.5						171				583
ERE	69502	Glen Wills Peg	EL006277	547980	5918567	1413	DORCHAP	6	PEG	PEG			Top of outcrop. Sampled across 6m transect. Moderately to strongly weathered. Grain size from 5-70mm, dominantly 5-20mm. Abundant quartz, muscovite, feldspar, common tourmaline (schorl).	Chip		AD21125751				32.1					1.6		10	16.35			25.9		1.4			0.7						106.5				529
ERE	69515	Glen Wills Peg	EL006277	547278	5918708	1436	DORCHAP	5	PEG	PEG			5x5 m dyke above Knocker Track. Grainsize varies from 5-250mm, dominantly 10-35mm. Quartz, feldspar, muscovite. Abundant tourmaline mm diameter. Possible petalite. Quartz veins 10-20cm wide forming approximately 5% of the outcrop. Moderately to strong	Chip		AD21125751				76.9					3.1		10	252			19.5		1.5			1.5						55.8				1145
ERE	69549	Glen Wills Peg	EL006277	547825	5919968	1270	DORCHAP	4	GRN_M	GRN_M			very weathered granite outcrop exposed in road cutting. Quartz and feldspar. Dominanlty 4-7mm, some feldspars to 100mm across, quartz to 20mm. Most feldspar severly degraded and clay-like.	Chip		AD21125751				99.9					12.4		10	21.7			26.7		1.1			40.3						33.9				596
ERE	69554	Glen Wills Peg	EL006277	547455	5921199	1284	DORCHAP	16	PEG	PEG			Bluejacket dyke. Sample transect 15m wide across adit/trench below road. Quartz, feldspar and muscovite common. Minor lepetelite and obligonite. (sample includes two fust-sized pieces of lepetilite and obligonite). Feldspars to 900mm, quartz to 200mm, mu	Chip		AD21125751				17.9					1.6		10	526			40.3		1.3			1.1						76.7				2010
ERE	69559	Glen Wills Peg	EL006277	547437	5921851	1194	DORCHAP	8	PEG	PEG			8m wide dyke exposed in road cutting. Strongly weathered. Quartz to 200mm, feldspar to 80mm, muscovite to 60mm, tourmaline to 5x50mm. Tourmaline (schorl) abundant. Quartz, feldspar, muscovite possible obligonite. Grainsize dominantly 10-40mm.	Chip		AD21125751				55.8					2.7		10	15.1			23.9		0.8			2.3						215				436
ERE	69561	Glen Wills Peg	EL006277	547636	5921179	1301	DORCHAP	8	PEG	PEG			Dyke 100m east of Bluejacket. Approximately 12X40m. Sampled over 8m on west side of dyke. Grainsize 2-240mm, dominantly 10-60mm. Quartz, feldspar, muscovite. Moderately to strongly weathered.	Chip		AD21125751				28.2					1		10	110.5			30.1		2			0.7						120				1125
ERE	69563	Glen Wills Peg	EL006277	547603	5921197	1302	DORCHAP	12	PEG	PEG			Dyke 100m east of Bluejacket. Approximately 12X40m. Top of dyke sampled over 12m. Grainsize 2-600mm, dominantly 5-60mm. Quartz, feldspar, muscovite. Common tourmaline, some with a dark blue hue. Rare garnet to 6mm. Most tourmaline is schorl. strongly w	Chip		AD21125751				26.1					1.2		10	91			32.4		1.3			0.7						150.5				1025
MIRE	69573	Dorchap Peg	EL5315	526946	5949753	695	DORCHAP	10	PEG	PEG			Approximately 10 x50m dyke. Sampled over 10m at base of dyke. Grainsize varies from 1-150mm, dominantly 5-20mm. Quartz, feldspar, muscovite. Moderately to strongly weathered.	Chip		AD21125751				15.2					0.5		10	30.7			15.9		0.8			0.3						55.1				604
MCRE	69590	Dorchap Peg	EL006486	523175	5948168	1040	DORCHAP	20	PEG	PEG			20x40m dyke exposure on strike line between OC441 and 441. Sample collected across 20 m transect. Quartz and feldspar dominated. Minor muscovite. Rare tourmaline and cassiderite. Grain size 1-400mm, dominantly 20-60mm. Moderately to strongly weathered.	Chip		AD21125751				42.4					3.6		10	51.2			24.5		2.5			1.7						110.5				725
MCRE	69598	Dorchap Peg	EL006486	534364	5943377	956	DORCHAP	10	PEG	PEG			45x10 m dyke. Sample collected downhill from dyke over 10m. Quartz, feldspar, muscovite. Grainsize 1-100mm, dominantly 5-15mm. Moderately to strongly weathered.	Chip		AD21125751				16					0.8		0	102			32.9		5.4			0.8						210				949
ERE	69605	Glen Wills Peg	EL006277	547259	5922581	1199	DORCHAP	0.5	PEG	PEG			5x15m dyke sampled across 5 m. Very weathered. Quartz, feldspar and amblygonite, possible lepetilite. Occasional dark green tourmaline. Common cassiderite. Common to minor muscovite, occasional tourmaline (schorl). Grainsize 10-100mm, dominanlty 10-50mm.	Grab		AD21125751				135					2		10	333			14.6		1.9			1.7						62.9				1435
ERE	69616	Glen Wills Peg	EL006277	547173	5921380	1288	DORCHAP	7	PEG		PEG		20x20m area of subcropping pegmatite, sampled over 7 m adjacent to old trenching. Centre is mullock heap and shaft. Quartz, feldspar, muscovite. Common to abundant tourmaline (schrl), some with a green tinge. Grainsize 2-80mm, dominantly 5-20mm. Strongly weathered.	Chip		AD21125751				39.7					3.2		10	41.5			31		1.4			3.2						59.3				525
UNK	69666	Glen Wills Peg	OUT	540849	5932472	1040		5	PEG	PEG			Duncans Log track. 5m wide pegmatite sampled over 5m. Grainsize 1-20mm, dominantly 2-5mm. Quartz, feldspar, muscovite. Moderately to strongly weathered.	CHIP		AD21125751				12.4					0.7		10	53.9			26		2.8			0.4						119				929
UNK	69667	Glen Wills Peg	OUT	540902	5932377	1053		12	PEG	PEG			Duncans Log track. 12m wide pegmatite. Trench on west side of dyke. Grainisze 1-30mm, dominantly 10-18mm. Quartz, feldspar, muscovite. Moderately weathered.	CHIP		AD21125751				18.5					1.1		10	84.3			30.5		2.9			0.6						85.5				1365
ERE	69673	Glen Wills Peg	EL006277	549396	5921978	976		5	PEG	PEG			Lanmans track near ridge. 5m wide outcrop in road cutting. Grainsize 2-50mm, dominantly 5-15mm. Quartz, fledspar, muscovite. Moderately to strongly weathered.	CHIP		AD21125751				17.9					4.1		10	35.4			22.7		3.1			2.6						106.5				346
ERE	69694	Glen Wills Peg	EL006277	546977	5916969	1369		8	PEG	PEG			Helitarget BIG31. 20x8m. Sampled over 8m. Quartz veins 50 x 300 cm making up 20% of the outcrop. Feldspar, muscovite, quartz. Abundant tourmaline (schorl) upt ot 5cm. Grainsize 5-1200mm, dominantly 30-200mm. Strongly to moderately weathered.	CHIP		AD21125751				17.8					2.3		0	56.5			31.1		0.8			1.4						153.5				613
UNK	69696	Glen Wills Peg	OUT	544553	5923057	1192		6	PEG	PEG			Omeo highway. 6m wide outcrop in road cutting. Grainsize 1-20mm, dominantly 2-15mm. Quartz, feldspar, muscovite. Exceptionally weathered. Feldspar becoming clay. Granitic pegmatite	CHIP		AD21125751				30.7					1.9		10	52.5			25.1		2			1.2						70.8				795
SRE	69750	Dorchap Peg	EL006277	547399	5921260	1245		12	PEG	PEG			Downhill, base of Bluejactet dyke. Sampled over 12m. Quartz, feldspar, muscovite. Minor to common lepetilite. Possible ambligonite. Rare bluejacket tourmaline. Moderately to strongly weathered. Grainsize 5-400mm, dominantly 10-50mm.	CHIP		AD21125751				10.2					2.3		10	292			27.4		1.9			1.1						139.5				1170
MCRE	69845	Dorchap Peg	EL006486	533794	5940063	1273		8	PEG	PEG			8x20m dyke. Pegmatite. Sampled over 8m. Quartz, feldspar, muscovite. Large feldspars upto 400 mm, strongly weathered.	CHIP		AD21125751				18.3					0.8		10	299			31.1		3.9			0.5						1020				1960
SRE	69925	Dorchap Peg	EL006277	549339	5923665	941		4	PEG	PEG			North face of outcrop, chips across part of escarpment where PEG consists of coarse Qtz/Plagioclase crystallisation. Photo of escarpment. H633 and H634 are probably of the same huge outcrop. See GPX file for edge of outcrop points	CHIP	PEG	AD21125751				12.7					0.3		10	53.3			23.2		0.7			0.2						38.1				1920
SRE	69930	Dorchap Peg	EL006277	549387	5923615	980			PEG	PEG			Outlying 'arm' of sth edge of outcrop. Fractionated? Phases of coarse Plagioclase, potentially Petalite (photo)	GRAB	PEG	AD21125751				23.4					0.9		10	50			31.2		0.6			0.8						53.9				1525
MMD	mull1	Mullengendra Peg	ELA5703	524091	6025248	577		7	PEG	PEG			Fine grained aplitic, with K-feldspar, mica, quartz. Mod. weathered. Boulders (generally 4x3 m exposed). Sharp contacts with Sed to North and Sed Flt to south - appears to lens out both ends.	CHIP		AD21125751	0.02	6.9	38.4	32.8	121.5	0.6	0.13		4.7	0.3	10	170	1.8	0.46	18.5	0.09	1		2.32	2.8	4210	0.02	260	0.23	3.06	66.4	1.2	1760	14.9	1190			0.64
MMD	mull2	Mullengendra Peg	ELA5703	524133	6025234	586		10	PEG	PEG			Fine grained aplitic, with K-feldspar, mica, quartz. Mod. weathered. Boulders (generally 4x3 m exposed). Sharp contacts with Sed to North and Sed Flt to south - appears to lens out both ends.	CHIP		AD21125751				21.3					1.5		10	153.5			19		1.3			0.7						72.2				1270
Walwa	70416	Walwa Pegmatite		563996	6021520	294			PEG	PEG						AD21159924	0.02	7.54	2.5	20	19.7	0.27	0.05		4.35	2.9	2	87.7	2.1	0.37	21.8	0.15	1.6		2.16	4.5	69.7	0.02	93	0.18	3.6	57.4	1.7	620	8.3	1390			0.06
Walwa	70417	Walwa Pegmatite		563675	6021428	326			PEG	PEG						AD21159924
Walwa	70418	Walwa Pegmatite		563655	6021399	333			PEG	PEG						AD21159924	0.04	6.69	1.2	10	506	0.2	0.14	0.03	1.64	3.2	3	179.5	1.4	0.28	24	0.16	0.4	0.038	1.33	1.4	69.1	0.02	118	0.42	4.45	89.2	1.7	1000	8.8	1515			0.07
Walwa	70419	Walwa Pegmatite		563652	6021396	333			PEG	PEG						AD21159924	0.01	6.22	1.8	10	158	0.14	0.13	0.07	0.75	3.9	1	125	1.2	0.26	17.15	0.15	0.5	0.015	1.05		35.5	0.02	86	0.07	4.97	42.2	1.5	1010	8.2	1015			0.05
Walwa	70420	Walwa Pegmatite		563614	6021434	302			PEG	PEG						AD21159924	0.08	0.54	9	20	2.16	1.2	0.02	0.04	6.58	1	8	2.12	2.5	1	1.25	0.15	0.1	0.011	0.18	3.3	59.8	0.03	129	0.29	0.03	0.9	4	150	22.6	21.6			0.22
Walwa	70421	Walwa Pegmatite		563932	6021141	285			PEG	PEG						AD21159924		6.94	1.8	10	5.05	0.38	0.01		1.72	0.7	4	93	1.4	0.48	27.8	0.2	0.8	0.051	2.85	0.9	83.1	0.01	147	0.48	1.64	41.8	2.7	560	11.5	1705			0.07
Walwa	70422	Walwa Pegmatite		563933	6021135	285			PEG	PEG						AD21159924	0.04	6.99	1.9	30	5.34	0.58	0.08	0.05	2.98	0.8	2	70.5	1.2	0.46	24.6	0.24	1.1	0.042	2.21	1.5	62.6	0.01	207	0.09	3.29	45.3	1.9	1050	11.5	1345			0.07
Walwa	70423	Walwa Pegmatite		563944	6021103	289			PEG	PEG						AD21159924	0.03	7.36	1.8	20	6.31	1.24	0.09	0.03	1.49	0.5	2	70.9	1.2	0.38	23.2	0.29	2.8	0.021	2.3	0.7	290	0.01	192	0.22	3.61	93.5	1.6	1130	13.2	1300			0.06
Walwa	70424	Walwa Pegmatite		563937	6021112	287			PEG	PEG						AD21159924		7.5	1.2	20	5.7	0.52	0.04		2.68	0.6	4	114	1.3	0.39	24.7	0.25	1.7	0.021	2.8	1.2	57.6	0.01	137	0.53	3.85	100	2.5	850	10.4	2040			0.07
Walwa	70425	Walwa Pegmatite		564081	6021055	295			PEG	PEG						AD21159924	0.06	6.87	1.6	10	5.05	0.52	0.17	0.06	1.06	0.3	1	66.5	0.9	0.28	18.85	0.27	1.5	0.016	2.56	0.5	228	0.01	295	0.05	3.9	48	1.2	1560	10.5	1410			0.07
Walwa	70426	Walwa Pegmatite		564007	6021545	290			PEG	PEG						AD21159924	0.01	7.63	1.5	30	3.83	0.23	0.04		2.73	1.5	1	232	1.3	0.25	17.9	0.32	0.3	0.006	6.52	3.7	55.9		57	0.16	2.53	76.9	1.2	1820	19.2	4200			0.05
SRE	70390	Yabba Diorite		516672	5976127	520			DIO							AD21137138	0.03	7.12	3.1	580	2.14	0.53	1.14	0.05	72.7	7.7	31	8.7	7.2	2.65	17.05	0.13	1.8	0.05	3	34.6	40.8	0.77	400	0.59	1.69	11.6	18.4	680	33.7	170.5		0.01	0.06
SRE	70391	Yabba Diorite		516445	5975943	580			DIO							AD21137138	0.05	7.33	4.6	480	3.09	0.93	0.58	0.04	77.6	9.9	42	11.95	12.9	3.11	19.3	0.14	1.6	0.065	3.18	37.8	40.7	0.9	474	0.57	1.08	13	23.5	730	31.6	197.5		0.02	0.07
SRE	70392	Tallandoon Peg		516662	5976135	520			PEG							AD21137138	0.05	7.29	1.5	60	1.25	0.61	0.49	0.05	5.6	1.1	6	5.92	3	0.87	15.05	0.06	0.6	0.017	3.37	3	18	0.08	96	0.78	2.46	6.7	2.6	580	43.1	157.5			0.07
SRE	70393	Yabba Granite		516160	5975722	662			GRN							AD21137138	0.03	7.34	0.6	310	3.14	1.07	0.13		65.5	6	21	14.55	18.9	2.32	23.9	0.13	3.5	0.129	4	31.7	85.4	0.48	268	0.58	0.84	15.1	12.3	570	35	309			0.17
SRE	70394	Tallandoon Peg		512580	5977807	591			PEG							AD21137138	0.03	6.94	4.4	170	1.81	2.5	0.29		4.14	0.5	4	9.41	2.2	0.51	11.3	0.07	0.9	0.01	4.25	2.2	9.7	0.05	59	0.51	2.14	2.9	1.2	700	44.9	174.5			0.09
SRE	70395	Omeo Metamorphics		512538	5977290	591			SED							AD21137138	0.02	5.15	1.1	340	1.15	0.58	0.25	0.02	81.1	6.9	27	6.44	4.4	1.92	11.75	0.13	2.8	0.04	2.17	39.3	17	0.42	131	0.34	0.58	9.4	13.3	220	26.7	143.5
SRE	70396	Yabba Granite		512698	5977941	554			GRN							AD21137138	0.03	7.32	0.5	640	1.45	0.59	0.62	0.02	83.8	12.4	54	14.45	14.9	3.88	20	0.15	1.9	0.112	4.2	40.7	56.2	1.13	631	0.47	1.36	17.5	28.5	690	40.4	273
SRE	70397	Basalt		512681	5977971	558			BAS							AD21137138	0.1	8.32	4.3	1160	3.54	0.16	4.12	0.06	59.3	20.5	25	3.64	79.2	5.67	21.6	0.11	4.2	0.067	2.57	27.9	19	2.15	1080	0.56	2.16	17.1	20.5	1830	14.7	89.3		0.04	0.16
SRE	70398	Omeo Metamorphics		512251	5977651	604			SED							AD21137138	0.01	6.21	2.6	340	3	0.21	0.11	0.04	90	15.9	48	12	21.8	3.54	16.25	0.13	2.7	0.065	2.07	43	30.9	0.96	261	0.29	0.27	15.1	21.8	220	19.8	178			0.05
SRE	70399	Tallandoon Peg		513317	5976823	806			PEG							AD21137138	0.03	6.39	0.9	380	1.67	7.48	0.26		15.45	2.5	10	4.77	8	1.21	12.05	0.06	0.6	0.025	3.39	8.6	17.5	0.14	147	0.92	1.3	4.7	4.9	340	49.6	146			0.2
SRE	70400	Yabba Granite		513778	5976841	912			GRN							AD21137138	0.04	7.91	148.5	470	4.41	3.47	0.16		72	8	48	15.15	22.9	3.25	22.8	0.12	2.1	0.075	3.83	34.3	48.1	0.78	382	0.91	0.7	16.6	21.1	680	33.8	281		0.01	0.7
SRE	70401	Omeo Metamorphics		514160	5974477	731			SED							AD21137138		6.9	5.6	280	2.72	0.75	0.01	0.02	126	14	57	26.3	15.7	4.2	23.2	0.17	2.3	0.083	2.61	64.1	75.8	1.1	346	0.31	0.1	17.4	23.9	300	24.7	248			0.07
SRE	70402	Tallandoon Peg		513833	5974255	665			PEG							AD21137138	0.07	7.15	1.6	60	0.52	0.07	0.77	0.06	4.43	0.3	2	3.39	4.4	0.33	14.1	0.05	0.3	0.009	2.09	2.2	14.2	0.05	47	0.18	3.33	4.1	0.8	610	33	89.7			0.05
SRE	70403	Yabba Granite		514834	5974681	833			GRN							AD21137138	0.02	7.21	2.8	100	0.51	0.81	0.13	0.02	4.52	1.2	5	9.51	12.1	0.9	13.45	0.08	1.6	0.019	4.57	2.6	15.5	0.07	228	0.59	0.84	6.7	2.5	580	54.3	193		0.01	0.42
UNK	ESK001	Dorchap Peg		524244	5959606				PEG				Peg exposed on track. qz, feld, musc.					6.73		20	7	0.3	0.039		1	5		33.5		0.443	20		1.5	0.1	21500	0.5	22	155	110		38400	68		875	30	533.5
UNK	ESK002	Dorchap Peg		522095	5960822				APL				peg/aplite qz, feld, greenish musc and possible minor greenish to white feld, (microcline?)					5.519			60.5	0.7	0.063	1.5	2		5	24.5		0.9835	20		1	0.1	15700	1	63	70	720		40700	29		3220	30	366
UNK	ESK003	Dorchap Peg		521731	5961289				PEG				peg exposed on track with perthitic textured feld xtals to 7cm , v weathered with qz, feld, musc.					6.48		120	19	0.2	0.1195		2	5		48.5		0.374	15		1	0.1	67200	1.5	55	120	80		18600	11		2070	30	715.5		50
UNK	ESK004	Dorchap Peg		523840	5959722				PEG				3 adjacent pegs to 3m in meta seds. Qz, feld, musc, very weathered, possible minor Sn.					6.241		35	95.5	0.1	0.0565		1	10		54.5		0.491	20		1.5	0.1	44200	0.5	72	105	105		27600	59		1085		917
UNK	ESK005	Dorchap Peg		524244	5959784				APL				narrow aplite to 6m width on road. Strike 300*, qz, feld , musc, fe staining on fracture planes.					6.225			3.5	0.7	0.037			10		55		0.5395	25		2		33300		43	30	375		32400	50		1125	30	975			0.5
UNK	ESK006	Dorchap Peg		520883	5967717				PEG				narrow qz, musc greisen to 3m in Sn workings. Match head size euhedral cassiterite disseminated. Muscovite					7.342		85	8.5	1.3	0.015		5	10		221		0.5735	40		2	0.1	36400	3	110	590	85		3700	105		255		1722
UNK	ESK007	Dorchap Peg		518809	5965729				PEG				Peg on track. 10m wide, qz, feld, musc tour (schorl). Minor spessartite and apatite					6.13		20	3	1.4	0.0445		4	10		105		0.583	15		1.5		34000	2	54	220	665		27800	9		1160		436
UNK	ESK008	Dorchap Peg		517204	5962141				PEG				Narrow peg on road. Qz, feld, musc, minor tour (schorl). Small grain of clear yellow topaz displaying perfect basal cleavage					6.299		55	39.5	0.4	0.023		5.5		15	24.5	20	0.6065	15		1.5	0.1	38100	3	17	185	390		26200	36	15	880	30	474		50
UNK	ESK009	Dorchap Peg		513514	5960470				PEG				Peg/aplite exposed on road25m wide, qz, feld, musc, tour (schorl). Numerous greisens, aplite and pegs to the west for 2km.				2	5.57		10	2	1.4	0.047		5	10	10	27		0.766	20		2	0.1	34600	2	38	315	475	3	16500	26		880		416.5		50
UNK	ESK010	Dorchap Peg		510041	5960112				PEG				V large peg 110m wide exposed on road cutting. Qz, feld Musc, minor biotite, spessartite, minor apatite					6.608		85	19.5	1.4	0.0485		4.5	15	15	39	10	2.078	20		2	0.1	47100	2	32	460	880		19400	25	5	795	50	706			1
UNK	ESK011	Dorchap Peg		524473	5957937				PEG				2 parralel dykes to 20m width. Western dyke displaying very large crystals of grey to white petalite to 40cm with lath shaped habit on western face of central dyke. Qz, feld, musc. Weathered.					6.314		25	14.5	0.5	0.044		1	10	10	87		0.282	15		1	0.1	56400		4066	100	85		16500	29		935	120	1376			2
UNK	ESK012	Dorchap Peg		524467	5957303				APL				float pf peg and fine grain aplite.					6.261		45	7	0.2	0.04		0.5	5		60.5		0.2775	25		4	0.1	14600		42	275	455		44500	36		515	80	474.5		50
UNK	ESK013	Dorchap Peg		523704	5957416				PEG				Coarse to medium grain peg. Xtals of petalite to 15cm. Fine grain spodumene (? Heavier SG) in finer grain areas with chlorite alt. Qz, feld, greenish musc in part. Possible eucryptite. 20m wide approx					4.87			104	0.3	0.033	0.5	0.5		10	25	10	2.005	15		1.5	0.1	18200		11170	60	350		14300	120	5	675		621
UNK	ESK014	Dorchap Peg		523748	5957106				PEG				Peg outcrop and subcrop. Width possibly up to 30m. Highly weathered. Possible minor petalite and minor spodumene in part in qz, feld and musc. Possibly down strike of ESK 013				2	5.954		10	38	0.7	0.0755	0.5	2	5	5	32.5		0.4495	20		1		38000	1.5	61	60	120		32200	48		1300		845.5		100
UNK	ESK015	Dorchap Peg		514858	5975079				GRN				Med to FG greisenized two mica granite. Altered and partly kaolinized. Musc, Biotite, feld qz, minor cassiterite and tour (schorl)																								90					10
UNK	ESK016	Dorchap Peg		519223	5977373				PEG				Blocky Albite rich peg exposed on track qz, musc and unidentifiable very oxidized Fe rich grains disseminated. Possibly Fe rich garnet, (almandite?) Minor tour (schorl)																								20					25
UNK	ESK017	Dorchap Peg		513025	5958279				PEG				Peg exposed on road possibly within zone extention. Test for Li and follow up if anomalous. Adjacent dykes are of the tour rich variety so possible limit of mineralized zone to the west..																								20					5
UNK	ESK018	Dorchap Peg		524580	5958546				PEG				Peg float near 361, Qz, feld musc and minor green/yellow spod(?)																								0					65
UNK	ESK019	Dorchap Peg		522823	5957401				APL				Narrow aplite dyke adj to meta sed outcrop. Petalite, possibly minor hiddenite, green musc, chrome rich in part, blocky microcline and Qz.																								160					60
UNK	ESK020	Dorchap Peg		522816	5957381				PEG				multiple narrow peg dykes interbedded with meta seds, feld rich (microcline?) weathered with qz, green musc and minor petalite.																								140					55
UNK	ESK021	Dorchap Peg		522823	5957371				PEG				15m wide peg adj to esk020. Very large xtals of microcline (var amazonite-bleached and weathered) in some areas comprising 80% of dyke mass in areas. Minor petalite intergrown. Qz, green musc.																								160					30
UNK	ESK022	Dorchap Peg		522800	5957334				PEG				21m wide dyke adj to esk021. large blocky Xtals of microcline and possible minor petalite intergrowths, qz, greenish to silver musc and feld.																								90					80
UNK	ESK023	Dorchap Peg		523268	5957146				PEG				2 x dykes exposed on track. Very weathered, kaolinized, qz, feld and musc.																								20					55
UNK	ESK024	Dorchap Peg		523181	5957174				PEG				Peg exposed on track. V weathered, qz, feld, musc and possible V weathered minor petalite?																								120					45
UNK	ESK025	Dorchap Peg		522863	5957199				APL				Narrow aplite/peg dyke exposed on track. Minor petalite in aplite? V weathered. Qz, feld, musc.																								60					60
UNK	ESK026	Dorchap Peg		522812	5957173				APL				Peg/aplite adj to ESK 025. Qz, feld, musc and possible minor weathered petalite (?)																								30					70
UNK	ESK027	Dorchap Peg		522768	5957159				PEG				As above. Peg on track, possibly 15 to 20m wide. Highly weathered																								80					50
UNK	ESK028	Dorchap Peg		521913	5957634				PEG				Narrow peg on trackQz, large blocky feld, greenish to silver musc and possible minor petalite (?)																								80					60
UNK	ESK029	Dorchap Peg		521736	5957928				PEG				Narrow peg, poor exposure, qz, feld - blocky, greenish to bright chrome muscovite ( fuchsite(?)), chlorite in qz, minor cassiterite.																								90					25
UNK	ESK030	Dorchap Peg		523932	5958232				PEG				Peg float, possible extention of the 10-15. Qz, Feld, musc.																								40					75
UNK	ESK031	Dorchap Peg		523259	5957423				PEG				peg/aplite dyke, possibly large size as float surrounding for 50m uphill across strike.Qz, feld, green musc, biotite, very altered, chlorite rich in part, v fine disseminated Ta (?) in aplite.																								110					60
UNK	ESK032	Dorchap Peg		523276	5957476				PEG				Peg, poor exposure, qz fe oxide stains on fracture planes, blocky microcline (?) silver to green musc, minor aplite, very weathered.																								270					70
UNK	ESK033	Dorchap Peg		523151	5957731				PEG				large outcrop of peg, blocky feld, qz, green musc, minor cassiterite, minor petalite (?), very weathered																								150					30
UNK	ESK034	Dorchap Peg		523131	5957735				PEG				17m wide peg and aplite. Qz, blocky feld, green musc, minor tour (schorl), minor cassiterite in aplite, possible minor petalite , very weathered.																								210					50
UNK	ESK035	Dorchap Peg		523117	5957647				APL				large peg/aplite 30m + wide, mostly aplite with disseminated Sn, peg - qz, green and silver musc, feld. Very weathered.																								420					65
UNK	ESK036	Dorchap Peg		523271	5957868				APL				27m wide peg/aplite, qz, feld, musc, very weathered. Finely disseminated tour (schorl) in aplite, chlorite alt in aplite very weathered.																								50					45
UNK	ESK037	Dorchap Peg		523402	5957819				PEG				Tin workings in greisen and peg. Narrow but rich in cassiterite workings over large area, shafts and shallow cuttings. Green beryl xtal to 8mm diam and 4cm long.																								60					165
UNK	ESK038	Dorchap Peg		523432	5957757				PEG				minor peg and greisen outcrop. Size unknown due to scree cover, Qz, feld and musc. Very weathered																								10					90
UNK	ESK039	Dorchap Peg		523212	5957654				PEG				peg outcrop. Size unknown due to scree cover. Qz, blocky feld, musc bright chrome green in part due to chlorite (fuchsite) possible petalite but very weathered.																								100					50
UNK	ESK040	Dorchap Peg		523126	5957483				PEG				Narrow peg, qz, feld, musc. Possible minor weathered petalite.																								30					35
UNK	ESK041	Dorchap Peg		522812	5957594				PEG				Peg outcropSize unknown due to scree cover, qz, feld and musc. Minor Sn.																								240					30
UNK	ESK042	Dorchap Peg		522804	5957555				PEG				Peg outcrop, size unknown due to scree, qz, feld, musc, minor Ta (?) Tour (elbaite, var indicolite - blue)																								130					60
UNK	ESK043	Dorchap Peg		522870	5957504				PEG				narrow peg/aplite, possibly 8m wide, qz, feld, musc, possible minor petalite, minor cassiterite in aplite with tour (schorl)																								70					45
UNK	ESK044	Dorchap Peg		524473	5957937				PEG				Petalite and spodumene rich pegmatite 10-15 dyke.																								910					55
UNK	ESK045	Dorchap Peg		524473	5957938				PEG				as above.,																								170					55
UNK	ESK046	Dorchap Peg		524473	5957939				PEG				as above.,																								190					50
UNK	ESK047	Dorchap Peg		534256	5943478				PEG				Pegmatite exposed on road. Qz, Feld and musc. Very weathered petalite? Very rich In part.																								4850					110
UNK	ESK048	Dorchap Peg		533991	5942772				PEG				Pegmatite exposed on road. Qz, Feld and musc. Minor elbaite, var rubellite. Very weathered																								70					75
UNK	ESK049	Dorchap Peg		533991	5942773				PEG				Pegmatite exposed on road. Small workings, possibly Sn, Qz, Feld, Musc, apatite and chlorite alt.																								80					65
UNK	ESK050	Walwa Pegmatite		WALWA TIN MINE					PEG				Large extensive alluvial and elivial tin workings. Cupola of granite exposed with disseminated cassiterite throughout.																								60					70
UNK	ESK051	Dorchap Peg		555023	5974215				PEG				Pegmatite exposed on road. Very weathered. Qz, Feld, Musc.																								20					10
UNK	ESK052	Dorchap Peg		556561	5971587				PEG				Pegmatite exposed on road. Poor exposure. Numerous pegmatites in the general area. Qz, Musc and feld x 2.
ERE	GW001	Glen Wills Peg		547575	5918378				APL				Aplite with minor peg 30m wide, strike 300*, dip 85*, feld, musc, tour (schorl) xtals to 3mm, coarser in peg, minor Sn and possible Ta in Qz, minor almandite and zircon.					5.086		30	1	0.5	0.164		3.5	10	5	11		0.6965	15		7	0.1	27900	1.5	3	365	160		34000	11	5	1050	20	274		100
ERE	GW002	Glen Wills Peg		547871	5918477				PEG				Peg, strike 300*, feld, musc, qz, greenish/black tour (schorl-elbaite? Series)Minor Sn disseminated, lge blocky albite in part + muscovite books in coarser peg sections possible weathered amblygonite?				2	4.374		50	1.5	0.4	0.0975		4.5		10	22		1.0775	20		3.5	0.1	29000	2.5	11	650	145		25900	31	5	955	10	444.5		50
ERE	GW003	Glen Wills Peg		547948	5918524				PEG				Feld, qz, musc tour (schorl) in coarse to med grain peg to 80m width. Disseminated spessartite - almandite series (dodecahedral) to 3mm minor Sn, minor aplite with disseminated tour (schorl)					5.254		60	1	0.7	0.113		1	5		16.5		0.5145	20		3		37200		7	375	320		32500	40		1575	10	532.5		100
ERE	GW004	Glen Wills Peg		547884	5918859				PEG				Peg outcrop, qz, feld, musc, tour (schorl) possible amblygonite? Weathered					5.152		20	2	0.2	0.0895		2.5		5	25		0.98	25		3.5	0.1	31700	1	30	325	1175		32300	37		1415	20	584.5		50
ERE	GW005	Glen Wills Peg		546819	5919313				PEG				Lge peg with aplite bands approx 50m + wide, strike + 200m, strike 275* (?), blocky feld, acicular radiating muscovite xtals, blocky qz to 1m, possible zoning - moss covered, minor pale pink spessartite to 2mm					5.081		10	1	2	0.0965		2.5	5	5	12.5	10	0.533	20		3	0.2	33900	1	4	250	280	1	26600	18		885		425.5		50
ERE	GW006	Glen Wills Peg		546952	5919321				PEG				peg exposed on rd, kaolinized, hornblende on contact, qz, feld, musc, minor apatite, tour (schorl) minor green petalite (?) with pearly lustre.					5.143		15	1.5		0.07		1.5		5	6.5		0.8785	20		2.5	0.1	14400	1	5	1790	75		32100	22		925		193
ERE	GW007	Glen Wills Peg		546320	5919771				PEG				Peg + aplite dyke, 25 to 30m wide, strike 340*, qz, feld, musc, tour (schorl), minor Sn in aplite, possible minor greenish mineral (eucryptite?)				1	5.397		35	1	0.6	0.1405		3	10	5	11		0.5875	15		2	0.1	37300	1.5	6	335	155		26400	11		945	30	363.5
ERE	GW008	Glen Wills Peg		546164	5920420				PEG				greisen on contacvt with meta seds, qz, minor feld + greenisg muscovite, Minor Sn, hornblende on contact with minor tour (dravite)					5.827		150	1	1.3	0.186		14	5		9.5		0.826	15		2.5	0.1	34900	7	7	1420	75		19700	8		650	30	231.5			0.5
ERE	GW009	Glen Wills Peg		548139	5919071				PEG				Peg and aplite dyke 35m wide, feld, qz, musc, minor tour (schorl)					6.645		40	1.5	0.3	0.1125		1.5	5		28.5		0.804	20		2.5	0.1	41400	0.5	3	290	910		32700	26		1860	10	816.5		50
ERE	GW010	Glen Wills Peg		548311	5918673				PEG				Peg and aplite float on road, qz, feld, musc and tour (schorl)					5.719		35	2.5	2.2	0.097		1		5	32		0.6725	20		2	0.1	32700	0.5	6	305	145	1	29000	43		1735		549		100
ERE	GW011	Glen Wills Peg		548138	5918680				PEG				Lge Peg with Sn workings, strike 340* and 310* side spur? 40m + width, qz + feld fine to blocky, musc books to 10cm, Tour (schorl), weathered blue and green elbaite(?) secondary minor blue scorzalite, dk green mineral lining vugh, weathered amblygonite (?)					6.323	100	35	3	0.4	0.9525		6	10	5	59.5	10	1.2	25		6	0.1	12700	2.5	70	615	1565		38100	317		7560		359.5		100	0.5
ERE	GW012	Glen Wills Peg		547551	5918910				PEG				Peg/aplite exposed on rd, qz, feld, musc, tour (schorl) strike 340*					5.533	50	25	1	1.1	0.16		4			11		0.8735	15		3	0.1	18700	2	2	540	265		33800	14		910	20	239.5		100
ERE	GW013	Glen Wills Peg		547301	5918416				APL				Peg and aplite dyke, mostly aplite, qz, feld, tour (schorl) and musc displaying radiating habit.					5.573		10	1	0.1	0.083		3.5	5		7.5		0.543	25		2	0.2	16600	2.5	4	745	65		31400	35	5	445	40	172		50
ERE	GW014	Glen Wills Peg		547262	5918430				APL				Aplite dyke, minor peg veins, qz, feld, musc and tour (schorl), extensive in strike >300m at 270*, 40m wide, dip 80*					5.142		5	0.5	0.5	0.1075		2.5	10	10	17.5		0.741	15		1.5	0.1	36900	1.5	7	300	95		27900	13		1080	40	310.5
ERE	GW015	Glen Wills Peg		547269	5917202				PEG				Peg down strike from Big 6?, qz, fgeld, musc, tour (schorl), adjacent to granite on Burnsdale track, Check for elements.					5.827		45	1.5	0.3	0.1295		7.5	5	15	6		2.371	15		2	0.1	16700	5	0	705	290		38200	8	5	665		116.5
ERE	GW016	Glen Wills Peg		546816	5916357				APL				fine grain aplite with minor peg, blue grey fine grain accicular xtals, possibly holmquistite(?)minor green transparent mineral possibly hiddenite (?) minor tour (schorl) in fine grain qz, feld, musc matrix.				1	6.266		40	1.5	0.4	0.0965		6.5			7.5	10	0.777	15		2	0.1	11800	3	0	3375	75		36800	8		345		79.5		50	0.5
ERE	GW017	Glen Wills Peg		546830	5916286				GRN				fg leuco granite, qz, feld and biotite. Minor tour (schorl) . Biotite could be zinnwaldite/protolithianite (?) check for Li content.					6.713		90	1.5	1.8	0.2435		30		10	12		0.8415	20		3	0.2	19900	14.5	4	4840	65		33500	13	5	900	30	147
ERE	GW018	Glen Wills Peg		547012	5920098				PEG				Coarse grained Peg exposed on knocker track, qz, feld , musc, tour (schorl)					5.814		60	1	0.8	0.114		3			9		0.8195	20		1.5	0.2	18700	1.5	10	535	105	2	30100	16	10	755	30	201
ERE	GW019	Glen Wills Peg		547224	5920099				PEG				Peg 15 to 20m wide, exposed on logging access track, qz, musc, feld, tour (schorl)					5.627		20	1	1.2	0.071		2		5	7.5		0.692	20		1	0.1	20100	1.5	14	755	95		18700	24		1440	20	276
ERE	GW020	Glen Wills Peg		547317	5920024				PEG				Peg exposed on logging access track. 40 to 50m wide. Qz, musc, feld, tour (schorl)				1	6.601		25	1	0.9	0.097		5			10.5		0.7115	20		1.5	0.2	31300	3	10	535	85		25500	17		890	20	291
ERE	GW021	Glen Wills Peg		546944	5921875				PEG				Peg in logging area, possible extention of blue jacket dyke. Qz, feld, musc - green and reddish in part, possible amblygonite (?) weathered, blue scorzalite and green mineral lining vughs, width unknown, tour vitreous and greenish in thin section (scorl-elbaite series), minor Sn and possible Ta.					6.88		55	25	0.5	0.7635		2	10		146.5		0.6145	25		2	0.1	20300	1	70	610	865		36000	150	5	5665		492			1.5
ERE	GW022	Glen Wills Peg		546661	5921700				PEG				Peg 35m wide exposed on road cutting, qz, musc, tour (schorl) and feld.					5.348		25	1	0.8	0.177		2			17.5		0.525	15		1	0.2	42000	1	28	495	110		23400	13		800	30	356
ERE	GW023	Quartz Reef		543709	5917415				QTZ				Qz breccia epithermal, 8 to 10m wide, strike in excess of 200m, qz banding surrounding breccia clasts, gossanous in part with boxwork ex sulphides, on granite and meta sed contact.					6.582		35	5	0.8	0.0465		2.5			30	10	0.4415	30		2	0.1	28200	1	11	120	120		43800	67		1425	30	853.5
ERE	GW024	Glen Wills Peg		543596	5920016				PEG				Peg exposed on logging track, size unknown due to cover, Qz, feld, musc, very weathered. Possible small grains of greenish spodumene(?) and weathered amblygonite(?). Very tiny grains of either cassiterite or tantalite (?)					6.37	220	15	7	0.7	0.027		4.5	5		53.5	40	0.5265	35		2.5	<0.1	24500	3.5	50	85	420		28700	100	5	1005		1147
ERE	GW025	Glen Wills Peg		543428	5919948				PEG				As above. Poor exposure. Very weathered. Minor zircon grains.
ERE	GW026	Glen Wills Peg		547361	5922569				PEG				Narrow dyke in clear fell logging area. Highly weathered, qz, feld, musc possible highly weathered montebrasite (?) green apatite, blue scorzalite, minor elbaite and schorl tour.																								90					55
ERE	GW027	Glen Wills Peg		547503	5921890				PEG				Peg to 10m wide, qz, feld (v weathered) - albite, var clevelandite, green muscovite, minor green apatite and minor cassiterite.																								50					90
ERE	GW028	Glen Wills Peg		543176	5926782				PEG				greisen on road, qz, feld and musc. Test for Li potential. Possible extention to blue jacket (?)																								140					15
ERE	GW029	Mt Wills Granite		541700	5927869				GR				Leuco granite and peg at base of mt wills. Qz, feld and white musc. Check for chemistry as source granite.																								30					20
ERE	GW030	Porphyry		548579	5917345				BRECCIA				Silicious breccia in epithermal in qz porphry , gossanous in part with sub-hedral and euhedral qz xtals
ERE	GW031	Quartz Reef		543643	5917434				QTZ				epithermal qz vein to 8m wide approx 100m long gossanous, brecciated sinter layered around breccia clasts and textbook epithermal layering.
ERE	GW032	Quartz Reef		543649	5917427				QTZ				as above.
ERE	GW033	Quartz Reef		543674	5917420				QTZ				as above.
ERE	GW034	Quartz Reef		543708	5917420				QTZ				as above.
UNK	1-848	East Kiewa Granodiorite		528515	5916075				GRN				Sourced from Bogong 1:100,00 map report				0.15	8.09209		805	1.5	0.2	1.83676		40.16		8	5.23	8	2.0284	15.3	2.6	2.7		3.47003	19.52		0.711615	464.684		1.73591	9.2		698.202	31	143.3			9.3
UNK	R45144	East Kiewa Granodiorite		524115	5921585				GRN				Sourced from Bogong 1:100,00 map report					9.57925					4.37393							3.62314					1.56899			1.76698	619.579		1.75816			610.927		80
UNK	R45145	East Kiewa Granodiorite		525615	5920185				GRN				Sourced from Bogong 1:100,00 map report					9.19291					3.81647							3.11954					1.61049			1.38102	464.684		1.95846			741.84		97
UNK	R45146	East Kiewa Granodiorite		526915	5919185				GRN				Sourced from Bogong 1:100,00 map report					8.77481					3.10177							3.04959					2.02557			1.1217	619.579		1.99555			698.202		112
UNK	50801	East Kiewa Granodiorite		521315	5925885				GRN				Sourced from Bogong 1:100,00 map report					8.32495		435			2.81589		54		11		0	2.95866	19.2				1.76822	25		0.85635	619.579		1.6543	10.5	8	741.84	16	99
UNK	48175	East Kiewa Granodiorite		526815	5917385				GRN				Sourced from Bogong 1:100,00 map report					8.5684		480			2.98742		54	10	8		1	2.9097	17.2				1.99236	24		1.10964	697.026		1.83976	10	4	654.564	16	101
UNK	48176	East Kiewa Granodiorite		524215	5921385				GRN				Sourced from Bogong 1:100,00 map report					9.84387	0.5	355			4.80989		35	19	19		15	4.37854	18.4				1.33654	15		2.09866	774.473		1.72107	6.5	10	654.564	9	66
UNK	48177	East Kiewa Granodiorite		521115	5921185				GRN				Sourced from Bogong 1:100,00 map report					8.35671	0.5	625			2.73013		82	10	10		1	3.11954	18.6				2.34933	37		0.940779	619.579		1.66914	11	5	872.753	19	119
UNK	50802	East Kiewa Granodiorite		528615	5918185				GRN				Sourced from Bogong 1:100,00 map report					8.26674	1	465			2.67296		63		10		4	2.54599	16.6				2.08368	27		0.958871	619.579		1.81009	10	7	654.564	18	112
UNK	R45147	East Kiewa Granodiorite		528115	5918985				GRN				Sourced from Bogong 1:100,00 map report					8.35142					2.8016							2.72785					1.94255			1.15185	464.684		1.78042	10	8	698.202		120
UNK	LTU2868	East Kiewa Granodiorite		528515	5917885				GRN				Sourced from Bogong 1:100,00 map report					8.25615					2.31561							2.17528					2.45725			0.916657	464.684		2.04748			741.84
UNK	HPE12	East Kiewa Granodiorite		521315	5925885				GRN				Sourced from Bogong 1:100,00 map report					8.16618					2.82304							3.00063					1.77652			0.85635	542.131		1.64688	9.5	6	741.84	17	103
UNK	HPE13	East Kiewa Granodiorite		528615	5918185				GRN				Sourced from Bogong 1:100,00 map report					8.13972					2.72298							2.56697					2.10858			0.964902	619.579		1.84718	10.5	5	698.202	19	116
UNK	1_7	Mt Wills Granite		543209	5923496				GRN				Sourced from Bogong 1:100,00 map report						1.03						24.9		13.6	11.1					6.22			13.4										181			13.7
UNK	4-224	Mt Wills Granite		541623	5926713				GRN				Sourced from Bogong 1:100,00 map report												12.4	0.51	16.9	37.8					0.88			5.99						15.3				348
UNK	4-224	Mt Wills Granite		541623	5962713				GRN				Sourced from Bogong 1:100,00 map report				0.06	7.40408		12	0.8	6.9	0.400229		8.873			31.95		0.720431	16.8	3.5	1.1		3.90171	4.4		0.102521	232.342		2.36647	13.3		916.39	3.28	316.7			0.2
UNK	4-223	Mt Wills Granite		541476	5927639				GRN				Sourced from Bogong 1:100,00 map report						1.14						17.3		136	27.6					1.98			7.61										321
UNK	R45129	Mt Wills Granite		535715	5929785				GRN				Sourced from Bogong 1:100,00 map report					7.72162					0.264437							1.1331					4.48282			0.331685	77.4473		1.80267	14	6	1134.58		332
UNK	50790	Mt Wills Granite		541415	5927085				GRN				Sourced from Bogong 1:100,00 map report					8.49431		6			0.214408		10		1			0.881304	25.2				3.58625	5		0.0904595	1626.39		2.52967	18	3	1352.77	16	520
UNK	50790	Mt Wills Granite		539315	5925685				GRN				Sourced from Bogong 1:100,00 map report					8.19794	2	44			0.200114		7		1			0.370707	20.6				3.8353	4		0.102521	0		1.95846	18	3	1265.49	31	337
UNK	HPE1	Mt Wills Granite		541415	5927085				GRN				Sourced from Bogong 1:100,00 map report					8.80127					0.221555							0.867315					3.55305			0.0904595	1858.74		2.55193	16.5	2	1352.77	19	535
UNK	HPE2	Mt Wills Granite		539315	5925685				GRN				Sourced from Bogong 1:100,00 map report					8.06033					0.200114							0.622508					3.8436			0.108551	77.4473		1.97329	16.5	2	1265.49	33	347
UNK	HPE4	Mt Wills Granite		534515	5932385				GRN				Sourced from Bogong 1:100,00 map report					7.35644					0.571755							0.909282					3.95982			0.217103	232.342		1.99555	9	4	829.115	51	267
UNK	3-246	Denderang Granite		515884	5944798				GRN				Sourced from Bogong 1:100,00 map report							555					61.9	7.75	20	4.38					4.26			31.2						12.3				125
UNK	3-287	Denderang Granite		512485	5943328				GRN				Sourced from Bogong 1:100,00 map report							411					40.5	2.93	12.9	6.65					2.71			22.1						15.3				237
UNK	1-825	Denderang Granite		501250	5966595				GRN				Sourced from Bogong 1:100,00 map report				0.19	7.67928	0.6	744	3.6		1.27216		47.2		6	4.6		1.24502	14.7	2.7	2.2		2.65648	24.91		0.307562	464.684		2.2997	9.9		523.652	44.4	120.5			1.8
UNK	1-828	Denderang Granite		510555	5946235				GRN				Sourced from Bogong 1:100,00 map report				0.14	7.54168		460	2	0.6	0.564608		35.31		6	5.68		1.16108	16	2.6	2.8		3.78549	16.26		0.235195	309.789		2.04006	13.3		872.753	41	200.3			5.3
UNK	4_295	Cobungra Granite		531732	5947802				GRN				Sourced from Bogong 1:100,00 map report							515					84.6	15.1	326	14.8					5.45			42						17.9				222
UNK	3_211	Cobungra Granite		522843	5927671				GRN				Sourced from Bogong 1:100,00 map report							406					51.5	6.36	38.5	6.03					3.58			25.9						14.6				176
UNK	3_211	Cobungra Granite		522843	5927671				GRN				Sourced from Bogong 1:100,00 map report				0.29	7.86451	0.8	417	1	0.3	0.428816		46.99		17	5.24	3	1.81856	17.9	2.8	3		2.79761	23.19		0.500543	232.342		1.82493	13.4	7	741.84	31.8	161.2			0.7
UNK	5_34	Cobungra Granite		507709	5959427				GRN				Sourced from Bogong 1:100,00 map report						2.4	413					60.1	9.33	161	19.9					4.2			31.8						15.8				250			0.22
UNK	LTU2862	Cobungra Granite		529215	5920085				GRN				Sourced from Bogong 1:100,00 map report					7.93861					0.636078							3.70008					3.41192			1.31468	542.131		1.0905			1047.3
UNK	HPE7	Cobungra Granite		525915	5931385				GRN				Sourced from Bogong 1:100,00 map report					7.00714					0.471698						8	3.18948					3.13797			1.02521	464.684		8.49407	13.5	24	610.927	23	216
UNK	4-257	Anglers Rest Granite		544805	5913605				GRN				Sourced from Bogong 1:100,00 map report							507					89.8	0.63	15.5	2.27		1.07715			3.64			42						15.1				139
UNK	4-257	Anglers Rest Granite		544805	5913605				GRN				Sourced from Bogong 1:100,00 map report				0.04	6.74252		627	3.8		0.628931		97.35			2.24		0.636497	13.4	2.3	4		3.35381	45.32		0.120613	77.4473		2.95994	13.8		130.913	10.9	140.5			0.5
UNK	48174	Anglers Rest Granite		543915	5907285				GRN				Sourced from Bogong 1:100,00 map report					6.9013	1	590			0.814751		56	4	2			1.09813	13.4				3.47003	31		0.19298	929.368		2.82641	12		174.551	15	181
UNK	LFB1420	Anglers Rest Granite		543915	5907285				GRN				Sourced from Benambra 1:100,00 map report					6.9013	1	590			0.814751		56	4	2			1.09593	13.4				3.47003	31		0.19298	309.789		2.82641	12		174.551	15	181
UNK	LFB1421	Anglers Rest Granite		546315	5905085				GRN				Sourced from Benambra 1:100,00 map report					6.6896	1	185			0.521727		41	3			6	0.77881	13.6				3.827	21		0.126643	309.789		2.69288	16.5		87.2753	23	259
UNK	LFB1422	Anglers Rest Granite		546315	5905485				GRN				Sourced from Benambra 1:100,00 map report					6.67372	1.5	160			0.500286		39	3				0.761707	14.8				3.79379	18		0.120613	309.789		2.81899	20		130.913	25	264
UNK	LFB1423	Anglers Rest Granite		548115	5905085				GRN				Sourced from Benambra 1:100,00 map report					6.63668	1.5	405			0.3502		69					0.658334	14.8				4.01793	32		0.0603064	77.4473		2.67804	18.5		43.6376	22	232
UNK	GVA-4	Anglers Rest Granite		553658	5920310				GRN				Sourced from Benambra 1:100,00 map report					6.65785		116.6			0.18582		53.1		3.5			0.552563	16.3				3.99303	22.9		0.0422144	77.4473		2.78932	14.8		43.6376	27.6	269.9
UNK	GVA-5	Anglers Rest Granite		551127	5911381				GRN				Sourced from Benambra 1:100,00 map report					6.91188	1.6	1148			0.557461		29					0.832342	15.2				3.79379			0.0964902	77.4473		2.93769	7.5		87.2753	18.9	202.2
UNK	GVA-9	Anglers Rest Granite		555054	5918002				GRN				Sourced from Benambra 1:100,00 map report					6.70548	0.4	381.7			0.300172		53.8		3.5			0.811359	14.6				3.80209	26.4		0.0783983	154.895		2.95252	10.4		130.913	16.1	248.8
UNK	GVA-10	Anglers Rest Granite		555632	5918181				GRN				Sourced from Benambra 1:100,00 map report					6.9013	0.8	451.7			0.543168		52.1		3.9			0.853326	15				3.64436	32.2		0.114582	154.895		3.07122	10		130.913	17.4	237.7
BRE	70438	Bendoc Shale		481040	5927079	989			SHALE				Biuffalo Granite Contact aureole				0.01	8.19	7.4	560	2.74	0.29	0.08	0.02	73.8	12.8	77	13	26.2	4.08	22.9	0.19	3.4	0.088	3.14	33.1	46.6	1.6	533	0.55	0.8	14.4	34.6	700	12.2	140			0.22
[truncated: 87 more columns]

## Sheet: File 2 XRD Data  
Hines et al. (2023). Supplemental dat
Australian Journal of Earth Sciences, 70(6), https://doi.org/10.1080/08120099.2023.2209649
Supplementary File 2. X-Ray Diffraction Data.
Quantitative X-ray Diffraction Data: Normalised weight% - should be considered semi-quantitative.
Comments: Detection levels are approximately 0.4 wt% , however are phase and sample dependant.
Sample No.	Easting (MGA Z55)	Northing (MGA Z55)	RL (m)	Pegmatite Group	Quartz	Albite	Microcline	Muscovite	Petalite	Spodumene	Amblygonite	Cookeite	Apatite	Tourmaline	Clinochlore	Biotite	Cassiterite	SUM
68923	523924	5949230	1116	North Dorchap	45	7.6	21.9	11.9	-	8.6	-	4.6	0.4	-	-	-	-	100
68927	524504	5942813	1165	North Dorchap	44.3	25.4	10.4	19.3	-	0.6	-	-	-	-	-	-	-	100
68930	523944	5949218	1109	North Dorchap	39.6	38.4	8.5	11.2	-	2.2	-	-	-	0.1	-	-	-	100
68933	524593	5950425	991	North Dorchap	37	33.9	13.8	10.4	-	2.6	-	2	0.3	-	-	-	-	100
68938	526237	5954441	829	North Dorchap	45.6	5.3	1.3	38.3	-	-	-	-	-	-	-	-	9.5	100
68941	524813	5959400	946	North Dorchap	36.6	38.6	11.6	12.9	-	0.3	-	-	-	-	-	-	-	100
68942	523746	5953848	577	North Dorchap	45.1	37.2	4.3	12.6	-	0.8	-	-	-	-	-	-	-	100
68943	523716	5953071	700	North Dorchap	37.4	24.5	11.1	8.9	-	13.5	-	4.3	0.3	-	-	-	-	100
68944	523694	5953087	708	North Dorchap	31.2	43	13.6	6.9	-	1.7	-	3.3	0.3	-	-	-	-	100
68949	525570	5959587	851	North Dorchap	60.9	10.3	1.8	24.5	-	1.5	-	-	0.3	-	-	-	0.7	100
68951	526147	5954165	819	North Dorchap	41.3	40.1	6	6.4	-	4	-	1.9	0.3	-	-	-	-	100
68956	523938	5949229	1104	North Dorchap	60.9	11.4	5.3	9.3	0.3	9.6	-	3.2	-	-	-	-	-	100
69007	523818	5952615	695	North Dorchap	39.5	35.6	14	6.5	-	1.7	-	2.3	0.4	-	-	-	-	100
69010	523830	5952598	703	North Dorchap	41.7	22.1	15.8	3.3	-	12	-	4.8	0.3	-	-	-	-	100
69036	524062	5949148	1163	North Dorchap	42.9	32.6	8.8	5.1	-	7.1	-	3.1	0.4	-	-	-	-	100
69052	524066	5949152	1550	North Dorchap	39	35.8	16.6	5.4	0.7	-	-	1.6	0.9	-	-	-	-	100
69122	523099	5953083	701	North Dorchap	34.4	36.4	15.1	8.7	-	2.4	-	2.7	0.3	-	-	-	-	100
69123	523712	5953064	708	North Dorchap	42	31.3	9.1	8.1	-	9.2	-	0.3	-	-	-	-	-	100
69126	523857	5952821	673	North Dorchap	36.6	38.5	10.4	10.2	-	1.5	-	2.5	0.3	-	-	-	-	100
69129	523827	5952605	700	North Dorchap	37.8	25.6	13.6	8.1	-	10.6	-	4.3	-	-	-	-	-	100
69133	524611	5950421	994	North Dorchap	41.4	39.9	7.9	3.6	-	4.9	-	2	0.3	-	-	-	-	100
69162	523404	5954446	583	North Dorchap	40.4	31.5	11.5	6.6	-	7.1	-	2.6	0.3	-	-	-	-	100
69167	523707	5952428	649	North Dorchap	41.1	37.9	12.8	3.4	-	2.3	-	2.2	0.3	-	-	-	-	100
69174	523843	5952533	694	North Dorchap	36.6	37.8	14	5.3	-	3	-	3	0.3	-	-	-	-	100
69175	523855	5952533	699	North Dorchap	39.7	25.6	16.9	8.8	-	5.5	-	3.5	-	-	-	-	-	100
69240	524482	5957927	893	North Dorchap	43.7	39.7	3.2	8	5.4	-	-	-	-	-	-	-	-	100
69241	524438	5957969	897	North Dorchap	34.6	38.8	9.3	5.6	11.7	-	-	-	-	-	-	-	-	100
69242	524425	5958006	900	North Dorchap	43.7	35.4	3.4	7.7	9.1	-	-	0.7	-	-	-	-	-	100
69245	524488	5957916	897	North Dorchap	37.8	36.5	13.3	7.6	4.8	-	-	-	-	-	-	-	-	100
69250	524566	5957801	918	North Dorchap	31.1	37.8	16.8	4.7	8.4	-	-	1.2	-	-	-	-	-	100
69252	524496	5957891	908	North Dorchap	33.1	45.1	5.1	9.1	7.6	-	-	-	-	-	-	-	-	100
69253	524493	5957907	908	North Dorchap	35.3	46.3	6.3	10.1	2	-	-	-	-	-	-	-	-	100
69254	524476	5957921	886	North Dorchap	38.6	48.1	6.3	5.5	1.5	-	-	-	-	-	-	-	-	100
69277	523695	5957386	665	North Dorchap	35.4	43.8	12.5	5.6	1.5	-	-	1.2	-	-	-	-	-	100
69300	523707	5953090	688	North Dorchap	42.4	19.5	22.6	3.4	-	5.9	-	5.8	0.4	-	-	-	-	100
69301	523718	5953080	691	North Dorchap	32	44	9	2	-	11	1	-	-	-	1	1	-	101
69302	523856	5952820	667	North Dorchap	45.3	36.2	7.3	4.5	-	3.6	-	2.7	0.4	-	-	-	-	100
69326	523790	5953831	552	North Dorchap	57.2	15.4	1.7	23.1	-	0.9	-	0.4	-	-	-	-	1.3	100
69332	523898	5952540	709	North Dorchap	15	11	69.2	2.5	1.5	0.3	-	0.1	0.4	-	-	-	-	100
69395	521517	5969455	327	North Dorchap	4.4	0.1	0.8	92.3	0.7	0.3	-	-	0.4	-	-	-	1	100
69445	534217	5943476	990	North Dorchap	32.2	41.4	11	6.9	0	8.1	-	0.4	0	-	-	-	-	100
69468	534249	5943476	977	North Dorchap	20.2	32	14.2	4.6	22.9	3.9	-	1.9	0.3	-	-	-	-	100
69469	534233	5943473	981	North Dorchap	23.8	37.4	16.2	5.1	7.6	7.7	-	1.9	0.3	-	-	-	-	100
69470	534238	5943464	990	North Dorchap	22.1	32.6	12	4.1	24.3	2.9	-	1.7	0.3	-	-	-	-	100
69490	529414	5949769	563	North Dorchap	39	38.3	2.9	12.4	-	1.7	3.6	1.2	0.9	-	-	-	-	100
69554	547455	5921199	1284	Glen Wills	40	38	5	15	-	-	-	-	-	-	-	2	-	100
69572	526991	5949736	721	North Dorchap	31.6	46.9	8.9	8	-	3	-	1.3	0.3	-	-	-	-	100
69573	526946	5949753	695	North Dorchap	34.9	35.5	8.6	5.1	-	14.5	-	1.1	0.3	-	-	-	-	100
69604	547369	5922579	1172	Glen Wills	29	38.3	27	3.1	-	-	0.1	2.1	0.4	-	-	-	-	100
69605	547259	5922581	1199	Glen Wills	27	39.9	29.5	2.9	-	-	0.1	0.2	0.4	-	-	-	-	100
69639	548131	5921655	1214	Glen Wills	42	44	2	8	2	-	-	-	-	-	-	1	-	99
69640	532419	5947911	533	North Dorchap	35.9	41.8	6.4	9.9	-	4.8	-	1.2	-	-	-	-	-	100
69641	526974	5949741	698	North Dorchap	31.4	45.5	11.9	6	-	3.1	0.1	1.7	0.3	-	-	-	-	100
69648	529434	5949783	551	North Dorchap	24.4	62.3	2	6.7	-	-	4.2	-	0.4	-	-	-	-	100
69649	529525	5949727	551	North Dorchap	28.8	45.9	9.8	7.6	-	3.9	2.6	1.4	-	-	-	-	-	100
69750	547399	5921260	1245	Glen Wills	57.9	25.9	4.2	9.7	-	1.4	0.1	0.5	0.3	-	-	-	-	100
69758	532232	5944815	537	North Dorchap	44.1	27.5	13.4	8.9	-	5.3	-	0.8	-	-	-	-	-	100
69845	533794	5940063	1273	North Dorchap	29	15.9	36.8	13.8	1.1	2.2	0.2	0.6	0.4	-	-	-	-	100
70423	563944	6021103	289	Walwa	31.8	46.5	9.9	9.6	-	0.6	-	1.1	0.3	-	-	-	0.2	100
70425	564081	6021055	295	Walwa	28.3	40.7	21.3	6.9	-	0.7	-	1.5	0.3	-	-	-	0.2	99.9
70426	564007	6021545	290	Walwa	25.3	39	30.6	2.6	-	0.3	0.2	1.7	0.3	-	-	-	-	100
BNPET01	524491	5957924		North Dorchap	3.3	2	-	-	94.7	-	-	-	-	-	-	-	-	100
ESK011	524473	5957937		North Dorchap	22.2	23.7	28.3	6.9	18.9	-	-	-	-	-	-	-	-	100
ESK013	523704	5957416		North Dorchap	27.9	19.5	6.9	5.1	50.6	-	-	-	-	-	-	-	-	110
ESK029	521736	5957928		North Dorchap	49.5	31.3	9.6	9.1	-	-	-	-	0.4	-	-	-	-	99.9
ESK031	523259	5957423		North Dorchap	45.8	50.1	0.9	3.2	-	-	-	-	-	-	-	-	-	100
ESK034	523131	5957735		North Dorchap	24.7	32.1	38.7	3.9	-	-	-	-	0.6	-	-	-	-	100
ESK035	523117	5957647		North Dorchap	44.2	38.6	12.3	4.9	-	-	-	-	-	-	-	-	-	100
ESK036	523271	5957868		North Dorchap	34.6	46.3	2.5	15.9	-	-	-	-	0.7	-	-	-	-	100
ESK039	523212	5957654		North Dorchap	49.3	40.2	2.1	8.4	-	-	-	-	-	-	-	-	-	100
ESK041	522812	5957594		North Dorchap	32.1	19.8	36.2	11.3	-	-	-	-	0.6	-	-	-	-	100
ESK042	522804	5957555		North Dorchap	34.2	64.8	-	1	-	-	-	-	-	-	-	-	-	100
ESK044	524473	5957937		North Dorchap	34.5	42.9	11.3	9.6	1.7	-	-	-	-	-	-	-	-	100
ESK045	524473	5957938		North Dorchap	33.1	58.7	4.6	3.6	-	-	-	-	-	-	-	-	-	100
ESK046	524473	5957939		North Dorchap	24.8	5.5	62.9	6.7	-	-	-	-	0.1	-	-	-	-	100
ESK047	534256	5943478		North Dorchap	25.5	40.3	5.1	3.8	24.7	0.1	-	-	0.5	-	-	-	-	100
GW011	548138	5918680		Glen Wills	42.7	35.9	2.3	17.3	-	-	-	-	1.8	-	-	-	-	100
MULL1	524091	6025248	577	Mullengandra	30.8	30	16	6.2	11.9	3.3	0.1	1.4	0.3	-	-	-	-	100
MULL2	524133	6025234	586	Mullengandra	36.5	31.2	16.1	7.1	-	7.2	0.2	1.4	0.3	-	-	-	-	100

## Sheet: File 3 Pb isotope data
Hines et al. (2023). Supplemental dat
Australian Journal of Earth Sciences, 70(6), https://doi.org/10.1080/08120099.2023.2209649
Supplementary File 3. Lead Isotope Data.
SAMPLE	Project / unit	Easting (MGA)	Northing (MGA)	206/204	207/204	208/204	208/206	208/207	206/207	Pb (ppm)
70440	Anglers Rest Granite	549524	5914676	17.18	15.51	37.2	2.166	2.399	1.108	14.2
70441	Anglers Rest Granite	548765	5915429	19.19	15.71	39.57	2.062	2.519	1.222	16.6
70360	Banimboola Quartz Monzodiorite	538761	5950350	18.33	15.58	38.34	2.092	2.461	1.176	69.9
70361	Banimboola Quartz Monzodiorite	538756	5950353	19.19	15.62	39.04	2.034	2.499	1.228	16.9
70366	Banimboola Quartz Monzodiorite	540774	5949839	18.95	15.66	39.23	2.07	2.506	1.21	22.2
70388	Banimboola Quartz Monzodiorite	541480	5949797	18.22	15.6	38.35	2.104	2.458	1.168	73.1
70446	Boorgunyah Granite	518808	5951819	20.33	15.7	38	1.869	2.42	1.293	41.4
70447	Boorgunyah Granite	518811	5951040	16.08	15.43	35.78	2.226	2.319	1.042	34.5
68960	Dorchap Pegmatite	520872	5950756	18.96	15.67	38.16	2.012	2.436	1.211	108.5
69006	Dorchap Pegmatite	523803	5952620	19.67	15.75	38.39	1.952	2.438	1.25	17.1
69110	Dorchap Pegmatite	526031	5944492	19.93	15.76	38.4	1.926	2.436	1.266	10.9
69237	Dorchap Pegmatite	522810	5957555	20.99	15.8	38.74	1.845	2.451	1.329	14.5
69240	Dorchap Pegmatite	524482	5957927	20.81	15.78	38.25	1.838	2.424	1.321	13.5
69252	Dorchap Pegmatite	524496	5957891	19.82	15.71	38.12	1.923	2.426	1.261	19.2
69299	Dorchap Pegmatite	523744	5953851	24.83	16	38.21	1.539	2.389	1.553	12.2
69301	Dorchap Pegmatite	523718	5953080	19.78	15.68	38.1	1.927	2.43	1.261	15.9
69652	Dorchap Pegmatite	527367	5946791	20.15	15.73	38	1.886	2.416	1.28	15
69845	Dorchap Pegmatite	533794	5940063	22.19	15.98	38.56	1.738	2.413	1.39	14.7
68949	Dorchap Pegmatite	525570	5959587	20.77	15.73	38	1.829	2.416	1.32	8.5
69050	Dorchap Pegmatite	523295	5948570	24.59	16.79	40.5	1.647	2.412	1.469	16.7
69191	Dorchap Pegmatite	515366	5949496	23.94	16.1	38.56	1.611	2.395	1.488	16.8
69245	Dorchap Pegmatite	524488	5957916	21.68	15.86	38.1	1.757	2.403	1.365	19.7
69332	Dorchap Pegmatite	523898	5952540	18.02	15.6	37.76	2.095	2.421	1.152	59.9
69598	Dorchap Pegmatite	534364	5943377	32.69	16.32	37.51	1.148	2.299	1.993	14.3
69930	Dorchap Pegmatite	549387	5923615	33.01	16.36	37.9	1.148	2.317	2.014	9.6
69502	Glen Wills Pegmatite	547980	5918567	84.02	19.26	38.26	0.455	1.986	4.36	8.4
69559	Glen Wills Pegmatite	547437	5921851	42.22	17.03	38.16	0.904	2.241	2.473	7.1
69563	Glen Wills Pegmatite	547603	5921197	35.48	16.47	37.98	1.07	2.306	2.153	7.4
69605	Glen Wills Pegmatite	547259	5922581	36.15	16.6	37.94	1.05	2.285	2.176	6.4
69554	Glen Wills Pegmatite	547455	5921199	16.91	14.88	35.35	2.091	2.377	1.136	5.3
69639	Glen Wills Pegmatite	548131	5921655	19.21	15.76	38.22	1.989	2.425	1.217	9.7
70392	Tallandoon Pegmatite	516662	5976135	20.91	15.65	37.77	1.806	2.414	1.332	43.1
70394	Tallandoon Pegmatite	512580	5977807	18.75	15.62	37.7	2.01	2.414	1.196	44.9
70399	Tallandoon Pegmatite	513317	5976823	18.66	15.61	37.76	2.023	2.419	1.192	49.6
70402	Tallandoon Pegmatite	513833	5974255	19.05	15.68	38.36	2.013	2.446	1.217	33
68987	Mount Wills Granite	523961	5941348	20.66	15.76	37.99	1.838	2.41	1.308	33.3
68990	Mount Wills Granite	524034	5941479	19.93	15.75	38.16	1.915	2.423	1.265	52.4
69025	Mount Wills Granite	531218	5938232	18.8	15.65	38.36	2.04	2.45	1.202	65.8
69027	Mount Wills Granite	537397	5933683	18.59	15.71	38.5	2.071	2.451	1.186	60
69480	Mount Wills Granite	532856	5939692	20.52	15.83	38.49	1.876	2.431	1.297	33.6
69841	Mount Wills Granite	537728	5936375	21.47	15.79	38.81	1.807	2.458	1.361	34.5
70443	Mount Wills Granite	541714	5927869	38.58	16.94	38.7	1.003	2.285	2.285	10.7
70390	Yabba Granite (Diorite Phase)	516672	5976127	19.39	15.7	39.76	2.051	2.532	1.233	33.7
70391	Yabba Granite (Diorite Phase)	516445	5975943	19.02	15.7	38.74	2.036	2.468	1.209	31.6
70393	Yabba Granite (Granitic Phase)	516160	5975722	21.67	15.93	40.1	1.85	2.517	1.36	35
70396	Yabba Granite (Granitic Phase)	512698	5977941	21.29	15.65	40.73	1.913	2.602	1.358	40.4
70400	Yabba Granite (Granitic Phase)	513778	5976841	19.93	15.67	39.22	1.967	2.502	1.27	33.8
70403	Yabba Granite (Granitic Phase)	514834	5974681	21.96	15.78	37.79	1.721	2.396	1.388	54.3
70395	Omeo Metamorphic Complex	512538	5977290	20.06	15.71	41.08	2.048	2.614	1.272	26.7
70398	Omeo Metamorphic Complex	512251	5977651	18.91	15.71	39.75	2.103	2.53	1.201	19.8
70401	Omeo Metamorphic Complex	514160	5974477	18.9	15.64	39.07	2.067	2.499	1.206	24.7
70438	Bendoc Shale	481040	5927079	19.39	15.77	40.32	2.079	2.556	1.231	12.2
70416	Walwa Pegmatite	563996	6021520	19.01	15.37	35.7	1.878	2.323	1.239	8.3
70418	Walwa Pegmatite	563655	6021399	16.45	15.5	36.21	2.201	2.336	1.063	8.8
70420	Walwa Pegmatite	563614	6021434	17.9	15.64	38.05	2.126	2.433	1.146	22.6
70421	Walwa Pegmatite	563932	6021141	18.74	15.72	37.49	2.001	2.384	1.195	11.5
70423	Walwa Pegmatite	563944	6021103	21.94	15.86	37.8	1.723	2.384	1.385	13.2
70424	Walwa Pegmatite	563937	6021112	22.83	15.96	37.39	1.638	2.343	1.433	10.4
mull1	Mullengandra Pegmatite	524091	6025248	24.32	16.06	38.29	1.574	2.383	1.512	14.9
mull2	Mullengandra Pegmatite	524133	6025234	24.72	15.98	37.95	1.535	2.374	1.543	16.3
70442	Sunnyside Mine	543709	5923181	17.97	15.67	38.59	2.148	2.463	1.149	12.9
70448	Mt Elmo Goldfield	520400	5951297	17.82	15.67	38	2.133	2.425	1.137	2610
70449	Mt Elmo Goldfield	520435	5951232	17.93	15.56	37.94	2.116	2.438	1.149	147.5
70450	Mt Elmo Goldfield	520430	5951223	18.12	15.65	38.2	2.108	2.44	1.157	129
70451	Mt Elmo Goldfield	520252	5951182	17.83	15.64	37.95	2.128	2.427	1.14	94
70452	Mt Elmo Goldfield	520472	5951089	18.17	15.68	38.47	2.117	2.453	1.16	160.5
70453	Mt Elmo Goldfield	520465	5951088	18.12	15.67	38.29	2.113	2.444	1.157	168
70454	Mt Elmo Goldfield	520470	5951076	18.11	15.61	38.38	2.12	2.458	1.162	149.5
70310	Tallandoon Goldfield	517940	5969963	18.19	15.77	38.59	2.121	2.447	1.154	2130
70311	Tallandoon Goldfield	517953	5969965	18.24	15.79	38.72	2.123	2.453	1.157	3940
70313	Tallandoon Goldfield	517970	5969932	18.22	15.76	38.59	2.118	2.449	1.157	851
70314	Tallandoon Goldfield	517976	5969932	18.21	15.77	38.65	2.123	2.451	1.156	6790
69981	Sandy Creek Goldfield	513801	5975553	18.15	15.63	38.03	2.095	2.433	1.16	82.9
69697	Sandy Creek Goldfield	514272	5975048	18.11	15.62	37.99	2.098	2.433	1.158	170.5
69698	Sandy Creek Goldfield	514265	5975052	18.07	15.64	38.03	2.105	2.432	1.153	164.5
70323	Sandy Creek Goldfield	513351	5976748	18.53	15.66	38.86	2.097	2.482	1.183	33.4
70334	Sandy Creek Goldfield	514256	5975041	18.27	15.63	38.71	2.119	2.476	1.168	119.5
70338	Sandy Creek Goldfield	512802	5977185	18.61	15.61	37.9	2.036	2.429	1.189	34.1
70343	Sandy Creek Goldfield	512802	5977191	18.33	15.7	38.42	2.096	2.446	1.167	57.6
